# Supplementary material for: Partial Unlock Caseload Management for COVID-19 Can Save 1-2 Million Lives Worldwide
Source: Preprints.org preprint supplement (doi:10.20944/preprints202004.0239.v1), 2020-04-15
Supplement: Supplementary file 1 [file supplementary]

## Sheet: US
Date of Unlock ->	2020-06-01	2021-01-01	2022-07-01	2020-11-01	2021-02-01	2021-06-01	0-main region, 1-subregion, 2-without sub	Use Daily Partial Unlock->1	UNLOCK ALL->1	Initial & Unlocked R0	Use proportional vent. alloc.	Initial Known Cases on Vent.	Days on vent and days spreading	Vents per capita	Vents avail for current region	Vents main region	Vents subregion (if not auto alloc)	Pre-Peak Vent. Util. Target	MWFSa or late Vent. Util. Target	TTSu Vent. Util. Target	Total / Known case ratio	Population	Population main region	Population subregion (e.g. NY St.)	Name of main region	Name of sub-region	Ventil mfg rate/day	Change per day in crit cases on vent
Effective-ness->	0.05	0.4	RE- LOCK	0.6	0.75	1	0	1	0	2.5	0	0.03	14	0.000316176	100000	100000	7500	0.3	0.6	0.6	7.1	340000000	340000000	20000000	US	NY	300	3e-05
Date	Predicted Known cases	US known cases	US known cases	NY known cases	Target Vent. Util.	Known Active Cases	Total Active Cases	Total cum. cases	Total New Known cases	Replication Rate (R0)	Unlock this day of the week on:	Lock-down ON/OFF		US cases	historical active cases	unlock (%)	Ventilator Utilization	predicted active cases as of 3/21	predicted active cases	fraction of cases known	potential unlock effectiveness	Total Newly Cured	cum not spreading	susceptibility	Total recup-erating	last actual R0	current # ventils	current % known cases on vent	last 2-day avg R0	last locked R0	US pred	NY pred	US excl NY pred				date
2020-03-21	24000	24000	24000	10356	0	24000	170400	170400	2520.29	2.5	2021-01-01	0	2020-03-21	0.000501176	0.000501176	0.4	0.0072	0.000423529	0.000501176	0.140845	0.4	0	0	0.999499	170400	2.5	100000	0.03	2.5	2.5	0.00045	0.0072	0.00045					delta-cases
2020-03-22	32821	32821	32821	15168	0	32821	233029	233029	8821	1.52995	2021-01-01	1	2020-03-22	0.00068538	0.00068538	0	0.00980703	0.00049916	0.00068538	0.140845	0	0	0	0.999315	233029	1.53072	100300	0.02997	2.01498	1.52995	0.000615394	0.0086436	0.000525169				2020-03-22	8821
2020-03-23	43600	43600	43600	20875	0	43600	309560	309560	10779	1.48749	2021-01-01	1	2020-03-23	0.000910471	0.000910471	0	0.012976	0.000588258	0.000910471	0.140845	0	0	0	0.99909	309560	1.48851	100600	0.02994	1.50872	1.48749	0.0008175	0.0103557	0.000620269				2020-03-23	10779
2020-03-24	53870	53870	53870	25665	0	53870	382477	382477	10270	1.37592	2021-01-01	1	2020-03-24	0.00112493	0.00112493	0	0.0159688	0.000693251	0.00112493	0.140845	0	0	0	0.998875	382477	1.37717	100900	0.02991	1.4317	1.37592	0.00101006	0.0117927	0.000723019				2020-03-24	10270
2020-03-25	67857	67857	67857	30811	0	67857	481785	481785	13987	1.40644	2021-01-01	1	2020-03-25	0.00141701	0.00141701	0	0.0200352	0.000816973	0.00141701	0.140845	0	0	0	0.998583	481785	1.40803	101200	0.02988	1.39118	1.40644	0.00127232	0.0133365	0.000888787				2020-03-25	13987
2020-03-26	84773	84773	84773	37258	0	84773	601888	601888	16916	1.39347	2021-01-01	1	2020-03-26	0.00177026	0.00177026	0	0.0249308	0.00096276	0.00177026	0.140845	0	0	0	0.99823	601888	1.39545	101500	0.02985	1.39996	1.39347	0.00154224	0.0148581	0.0010636				2020-03-26	16916
2020-03-27	102738	102738	102738	44635	0	102738	729440	729440	17965	1.3448	2021-01-01	1	2020-03-27	0.00214541	0.00214541	0	0.0300948	0.00113454	0.00214541	0.140845	0	0	0	0.997855	729440	1.34718	101800	0.02982	1.36913	1.3448	0.00176094	0.0160401	0.00120844				2020-03-27	17965
2020-03-28	122070	122070	122070	52318	0	122070	866697	866697	19332	1.31228		1	2020-03-28	0.00254911	0.00254911	0	0.0356167	0.00133694	0.00254911	0.140845	0	0	0	0.997451	866697	1.3151	102100	0.02979	1.32854	1.31228	0.00208671	0.0180765	0.00140693				2020-03-28	19332
2020-03-29	140321	140321	140321	59513	0	140321	996279	996279	18251	1.25647		1	2020-03-29	0.00293023	0.00293023	0	0.0407808	0.00157541	0.00293023	0.140845	0	0	0	0.99707	996279	1.25968	102400	0.02976	1.28437	1.25647	0.00243846	0.0205101	0.00160658				2020-03-29	18251
2020-03-30	162417	162417	162417	66497	0	162417	1.15316e+06	1.15316e+06	22096	1.26826		1	2020-03-30	0.00339165	0.00339165	0	0.0470171	0.00185636	0.00339165	0.140845	0	0	0	0.996608	1.15316e+06	1.27198	102700	0.02973	1.26236	1.26826	0.00278306	0.0224985	0.00182691				2020-03-30	22096
2020-03-31	187500	187500	187500	75795	0	187500	1331250	1331250	25083	1.26378		1	2020-03-31	0.00391544	0.00391544	0	0.0540655	0.00218733	0.00391544	0.140845	0	0	0	0.996085	1331250	1.26808	103000	0.0297	1.26602	1.26378	0.00319845	0.0248976	0.00209235				2020-03-31	25083
2020-04-01	214465	214465	214465	83712	0	214465	1.5227e+06	1.5227e+06	26965	1.24792		1	2020-04-01	0.00447853	0.00447853	0	0.061599	0.0025772	0.00447853	0.140845	0	0	0	0.995521	1.5227e+06	1.25283	103300	0.02967	1.25585	1.24792	0.00372172	0.0277316	0.00243005				2020-04-01	26965
2020-04-02	244000	244000	244000	92381	0	244000	1732400	1732400	29535	1.23868		1	2020-04-02	0.00509529	0.00509529	0	0.0698085	0.00303641	0.00509529	0.140845	0	0	0	0.994905	1732400	1.24425	103600	0.02964	1.2433	1.23868	0.00432258	0.0311041	0.00280046				2020-04-02	29535
2020-04-03	276000	276000	276000	102863	0	276000	1959600	1959600	32000	1.22862		1	2020-04-03	0.00576353	0.00576353	0	0.078656	0.00357722	0.00576353	0.140845	0	17894	17894	0.994236	1959600	1.23491	103900	0.02961	1.23365	1.22862	0.00506565	0.0351032	0.00325968				2020-04-03	32000
2020-04-04	310500	310500	310500	113704	0	307980	2.18666e+06	2204550	34500	1.22089		1	2020-04-04	0.00648397	0.00643134	0	0.0874284	0.00419247	0.00643134	0.140845	0	62629.1	80523.1	0.993516	2.18666e+06	1.22796	104200	0.02958	1.22475	1.22089	0.00582735	0.0394481	0.00369804				2020-04-04	34500
2020-04-05	336327	336327	336327	123018	0	324986	2.3074e+06	2.38792e+06	25827	1.1567		1	2020-04-05	0.0070233	0.00678647	0	0.0918979	0.00486281	0.00678647	0.140845	0	76530.9	157054	0.992977	2.3074e+06	1.16425	104500	0.02955	1.18879	1.1567	0.00667846	0.0430488	0.00425124				2020-04-05	25827
2020-04-06	364028	364028	364028	130689	0	341908	2.42754e+06	2.5846e+06	27701	1.15976		1	2020-04-06	0.00760176	0.00713984	0	0.0963084	0.00563841	0.00713984	0.140845	0	72917	229971	0.992398	2.42754e+06	1.16796	104800	0.02952	1.15823	1.15976	0.00751546	0.0463399	0.00479501				2020-04-06	27701
2020-04-07	395000	395000	395000	139000	0	362610	2.57453e+06	2.8045e+06	30972	1.16842		1	2020-04-07	0.00824853	0.00757214	0	0.101745	0.00653529	0.00757214	0.140845	0	99307.7	329279	0.991751	2.57453e+06	1.17737	105100	0.02949	1.16409	1.16842	0.00843804	0.0496895	0.00539616				2020-04-07	30972
2020-04-08	426659	426659	426659	149316	0	380282	2.7e+06	3.02928e+06	31659	1.16416		1	2020-04-08	0.00890964	0.00794118	0	0.106291	0.00757178	0.00794118	0.140845	0	120104	449382	0.99109	2.7e+06	1.17384	105400	0.02946	1.16629	1.16416	0.00951214	0.0536966	0.00607706				2020-04-08	31659
2020-04-09	466546	466546	466546	161504	0	403253	2.86309e+06	3.31248e+06	39887	1.19504		1	2020-04-09	0.00974258	0.00842087	0	0.112277	0.00876887	0.00842087	0.140845	0	127552	576934	0.990257	2.86309e+06	1.20578	105700	0.02943	1.1796	1.19504	0.0106691	0.0580041	0.00678576				2020-04-09	39887
2020-04-10	502000	502000	502000	173258	0	420742	2.98727e+06	3.5642e+06	35454	1.16616		1	2020-04-10	0.0104829	0.00878608	0	0.116696	0.0101505	0.00878608	0.140845	0	137257	714191	0.989517	2.98727e+06	1.17763	106000	0.0294	1.1806	1.16616	0.0119453	0.06237	0.00756662				2020-04-10	35454
2020-04-11	531257	531257	531257	180458	0	430667	3.05773e+06	3.77192e+06	29257	1.13395		1	2020-04-11	0.0110939	0.00899333	0	0.11899	0.0117437	0.00899333	0.140845	0	129582	843773	0.988906	3.05773e+06	1.14597	106300	0.02937	1.15006	1.13395	0.0134098	0.0669861	0.00846725				2020-04-11	29257
2020-04-12	560402	560402	560402	189415	0	441561	3.13508e+06	3.97885e+06	29145	1.13015		1	2020-04-12	0.0117025	0.00922083	0	0.121533	0.0135795	0.00922083	0.140845	0	156882	1.00065e+06	0.988297	3.13508e+06	1.14283	106600	0.02934	1.13205	1.13015	0.015071	0.0719908	0.00947971				2020-04-12	29145
2020-04-13	596047	0			0	455110	3.23128e+06	4.23193e+06	35645	1.12945		1	2020-04-13	0.0124469		0	0.124783	0.0156927	0.00950376	0.140845	0	178089	1.17874e+06	0.987553	3.23128e+06	1.14283	106900	0.02931	1.1298	1.12945	0.0170033	0.0776175	0.0106538				2020-04-13	-560402
2020-04-14	632763	0			0	466743	3.31387e+06	4.49262e+06	36716.1	1.1286		1	2020-04-14	0.0132136		0	0.127483	0.0181227	0.00974669	0.140845	0	191452	1.3702e+06	0.986786	3.31387e+06	1.14283	107200	0.02928	1.12903	1.1286	0.0191521	0.0838717	0.0119209				2020-04-14	0
2020-04-15	670389	0			0	477404	3.38957e+06	4.75976e+06	37626.3	1.12773		1	2020-04-15	0.0139993		0	0.129898	0.0209135	0.00996932	0.140845	0	209698	1.57989e+06	0.986001	3.38957e+06	1.14283	107500	0.02925	1.12817	1.12773	0.0215645	0.0899982	0.0133618				2020-04-15	0
2020-04-16	708845	0			0	486325	3.45291e+06	5.0328e+06	38455.8	1.12683		1	2020-04-16	0.0148024		0	0.131822	0.0241145	0.0101556	0.140845	0	227200	1.80709e+06	0.985198	3.45291e+06	1.14283	107800	0.02922	1.12728	1.12683	0.0242533	0.0963638	0.0149612				2020-04-16	0
2020-04-17	747988	0			0	493468	3.50362e+06	5.31072e+06	39143.2	1.12591		1	2020-04-17	0.0156198		0	0.13325	0.0277805	0.0103048	0.140845	0	244950	2.05204e+06	0.98438	3.50362e+06	1.14283	108100	0.02919	1.12637	1.12591	0.0272453	0.102924	0.0167363				2020-04-17	0
2020-04-18	787674	0			0	498654	3.54044e+06	5.59249e+06	39685.8	1.12498		1	2020-04-18	0.0164485		0	0.13414	0.0319717	0.0104131	0.140845	0	183372	2.23542e+06	0.983552	3.54044e+06	1.14283	108400	0.02916	1.12544	1.12498	0.0305602	0.109611	0.0186983				2020-04-18	0
2020-04-19	827744	0			0	512897	3.64157e+06	5.87698e+06	40069.6	1.12403		1	2020-04-19	0.0172852		0	0.137449	0.0367583	0.0107105	0.140845	0	196677	2.43209e+06	0.982715	3.64157e+06	1.14283	108700	0.02913	1.1245	1.12403	0.0342386	0.116382	0.0208758				2020-04-19	0
2020-04-20	868923	0			0.3	526375	3.73726e+06	6.16935e+06	41179.4	1.12307		1	2020-04-20	0.0181452		0	0.140528	0.0422226	0.0109919	0.140845	0	219901	2.65199e+06	0.981855	3.73726e+06	1.14283	109000	0.0291	1.12355	1.12307	0.0383151	0.123308	0.0232813				2020-04-20	0
2020-04-21	911149	0			0	537628	3.81716e+06	6.46916e+06	42225.6	1.12209		1	2020-04-21	0.0190269		0	0.14299	0.048449	0.0112269	0.140845	0	224779	2.87677e+06	0.980973	3.81716e+06	1.14283	109300	0.02907	1.12258	1.12209	0.0428433	0.130422	0.0259465				2020-04-21	0
2020-04-22	954239	0			0.3	549060	3.89833e+06	6.7751e+06	43090.6	1.12108		1	2020-04-22	0.0199268		0	0.145481	0.0555282	0.0114657	0.140845	0	283198	3.15997e+06	0.980073	3.89833e+06	1.14283	109600	0.02904	1.12159	1.12108	0.0478676	0.137715	0.0288975				2020-04-22	0
2020-04-23	998207	0			0	553140	3.9273e+06	7.08727e+06	43967.3	1.12006		1	2020-04-23	0.0208449		0	0.146011	0.063557	0.0115509	0.140845	0	251723	3.41169e+06	0.979155	3.9273e+06	1.14283	109900	0.02901	1.12057	1.12006	0.0534262	0.145107	0.0321598				2020-04-23	0
2020-04-24	1.04246e+06	0			0.3	561940	3.98977e+06	7.40147e+06	44253.4	1.11901		1	2020-04-24	0.021769		0	0.147777	0.0726368	0.0117346	0.140845	0	207725	3.61942e+06	0.978231	3.98977e+06	1.14283	110200	0.02898	1.11953	1.11901	0.0595701	0.152552	0.0357693				2020-04-24	0
2020-04-25	1.08738e+06	0			0	577598	4.10095e+06	7.72037e+06	44915.3	1.11795		1	2020-04-25	0.022707		0	0.151325	0.0828717	0.0120616	0.140845	0	206930	3.82635e+06	0.977293	4.10095e+06	1.14283	110500	0.02895	1.11848	1.11795	0.0663487	0.160026	0.0397591				2020-04-25	0
2020-04-26	1.1335e+06	0			0	594576	4.22149e+06	8.04784e+06	46123.3	1.11688		1	2020-04-26	0.0236701		0	0.155191	0.094366	0.0124162	0.140845	0	253079	4.07943e+06	0.97633	4.22149e+06	1.14283	110800	0.02892	1.11741	1.11688	0.0738032	0.167481	0.0441587				2020-04-26	0
2020-04-27	1.18093e+06	0			0.3	606365	4.30519e+06	8.38462e+06	47433.5	1.6458		0	2020-04-27	0.0246606		0.4	0.157677	0.10722	0.0126623	0.140845	0.4	260684	4.34011e+06	0.975339	4.30519e+06	1.14283	111100	0.02889	1.38134	1.11688	0.0819743	0.17485	0.0490009				2020-04-27	0
2020-04-28	1.25221e+06	0			0	640931	4.55061e+06	8.89072e+06	71282.4	1.11465		1	2020-04-28	0.0261492		0	0.166044	0.121523	0.0133842	0.140845	0	267146	4.60726e+06	0.973851	4.55061e+06	1.14283	111400	0.02886	1.38022	1.11465	0.0908908	0.182038	0.0543138				2020-04-28	0
2020-04-29	1.30324e+06	0			0.3	654334	4.64577e+06	9.25303e+06	51029.3	1.64162		0	2020-04-29	0.0272148		0.4	0.168885	0.137353	0.013664	0.140845	0.4	273036	4.88029e+06	0.972785	4.64577e+06	1.14283	111700	0.02883	1.37813	1.11465	0.100587	0.188942	0.0601367				2020-04-29	0
2020-04-30	1.37997e+06	0			0	692605	4.91749e+06	9.79779e+06	76726.2	1.11173		1	2020-04-30	0.028817		0	0.178098	0.154761	0.0144632	0.140845	0	277917	5.15821e+06	0.971183	4.91749e+06	1.14283	112000	0.0288	1.37667	1.11173	0.111085	0.195535	0.0664996				2020-04-30	0
2020-05-01	1.43497e+06	0			0.3	708460	5.03007e+06	1.01883e+07	54999.1	1.63712		0	2020-05-01	0.0299655		0.4	0.1815	0.173768	0.0147943	0.140845	0.4	281769	5.43998e+06	0.970034	5.03007e+06	1.14283	112300	0.02877	1.37442	1.11173	0.122402	0.201754	0.0734354				2020-05-01	0
2020-05-02	1.51781e+06	0			0	751620	5.3365e+06	1.07765e+07	82845.3	1.10858		1	2020-05-02	0.0316955		0	0.191843	0.19435	0.0156956	0.140845	0	284494	5.72448e+06	0.968304	5.3365e+06	1.14283	112600	0.02874	1.37285	1.10858	0.134538	0.207537	0.0809745				2020-05-02	0
2020-05-03	1.57733e+06	0			0	771067	5.47458e+06	1.11991e+07	59516.6	1.10661		1	2020-05-03	0.0329384		0	0.196079	0.216431	0.0161017	0.140845	0	292374	6.01685e+06	0.967062	5.47458e+06	1.14283	112900	0.02871	1.10759	1.10661	0.147485	0.212832	0.0891451				2020-05-03	0
2020-05-04	1.63828e+06	0			0.3	790835	5.61493e+06	1.16318e+07	60947.6	1.63017		0	2020-05-04	0.0342111		0.4	0.200364	0.239872	0.0165145	0.140845	0.4	299802	6.31665e+06	0.965789	5.61493e+06	1.14283	113200	0.02868	1.36839	1.10661	0.161209	0.217588	0.0979696				2020-05-04	0
2020-05-05	1.73036e+06	0			0	840695	5.96894e+06	1.22856e+07	92085.6	1.10373		1	2020-05-05	0.0361341		0	0.212211	0.264455	0.0175557	0.140845	0	305943	6.62259e+06	0.963866	5.96894e+06	1.14283	113500	0.02865	1.36695	1.10373	0.17566	0.221754	0.107465				2020-05-05	0
2020-05-06	1.79664e+06	0			0.3	863883	6.13357e+06	1.27562e+07	66278.7	1.62479		0	2020-05-06	0.0375181		0.4	0.217261	0.289881	0.0180399	0.140845	0.4	312168	6.93476e+06	0.962482	6.13357e+06	1.14283	113800	0.02862	1.36426	1.10373	0.190758	0.225276	0.117639				2020-05-06	0
2020-05-07	1.8969e+06	0			0	920175	6.53324e+06	1.3468e+07	100259	1.09995		1	2020-05-07	0.0396118		0	0.230568	0.315764	0.0192154	0.140845	0	314199	7.24896e+06	0.960388	6.53324e+06	1.14283	114100	0.02859	1.36237	1.09995	0.206396	0.228104	0.12849				2020-05-07	0
2020-05-08	1.9692e+06	0			0.3	948218	6.73235e+06	1.39813e+07	72296.3	1.61892		0	2020-05-08	0.0411215		0.4	0.236723	0.341636	0.019801	0.140845	0.4	318899	7.56786e+06	0.958879	6.73235e+06	1.14283	114400	0.02856	1.35944	1.09995	0.222438	0.2302	0.140002				2020-05-08	0
2020-05-09	2.07885e+06	0			0	1.01295e+06	7.19196e+06	1.47598e+07	109649	1.09583		1	2020-05-09	0.0434112		0	0.251957	0.366951	0.0211528	0.140845	0	327475	7.89533e+06	0.956589	7.19196e+06	1.14283	114700	0.02853	1.35738	1.09583	0.238718	0.231534	0.152145				2020-05-09	0
2020-05-10	2.15814e+06	0			0	1.04612e+06	7.42743e+06	1.53228e+07	79287.6	1.09322		1	2020-05-10	0.0450669		0	0.259255	0.391103	0.0218454	0.140845	0	336778	8.23211e+06	0.954933	7.42743e+06	1.14283	115000	0.0285	1.09452	1.09322	0.25504	0.232084	0.164872				2020-05-10	0
2020-05-11	2.23982e+06	0			0.3	1.08037e+06	7.67063e+06	1.59027e+07	81688	1.60973		0	2020-05-11	0.0467728		0.4	0.266766	0.41345	0.0225607	0.140845	0.4	506105	8.73822e+06	0.953227	7.67063e+06	1.14283	115300	0.02847	1.35147	1.09322	0.27118	0.231838	0.178116				2020-05-11	0
2020-05-12	2.36404e+06	0			0	1.13331e+06	8.0465e+06	1.67847e+07	124222	1.08937		1	2020-05-12	0.0493668		0	0.278818	0.433343	0.0236662	0.140845	0	362308	9.10053e+06	0.950633	8.0465e+06	1.14283	115600	0.02844	1.34955	1.08937	0.286892	0.230794	0.191791				2020-05-12	0
2020-05-13	2.45223e+06	0			0.3	1.17047e+06	8.31031e+06	1.74108e+07	88185.7	1.60248		0	2020-05-13	0.0512083		0.4	0.286911	0.45016	0.0244421	0.140845	0.4	544756	9.64528e+06	0.948792	8.31031e+06	1.14283	115900	0.02841	1.34593	1.08937	0.301914	0.228965	0.205789				2020-05-13	0
2020-05-14	2.58621e+06	0			0	1.22772e+06	8.71678e+06	1.83621e+07	133975	1.08431		1	2020-05-14	0.0540061		0	0.29985	0.463339	0.0256376	0.140845	0	390493	1.00358e+07	0.945994	8.71678e+06	1.14283	116200	0.02838	1.34339	1.08431	0.315973	0.226376	0.219981				2020-05-14	0
2020-05-15	2.68129e+06	0			0.3	1.2678e+06	9.0014e+06	1.90372e+07	95087	1.08111		1	2020-05-15	0.0559917		0	0.308517	0.47241	0.0264747	0.140845	0	588202	1.0624e+07	0.944008	9.0014e+06	1.14283	116500	0.02835	1.08271	1.08111	0.328793	0.22306	0.234214				2020-05-15	0
2020-05-16	2.77919e+06	0			0	1.28286e+06	9.10831e+06	1.97323e+07	97902.3	1.07884		1	2020-05-16	0.0580361		0	0.31105	0.477028	0.0267891	0.140845	0	422568	1.10465e+07	0.941964	9.10831e+06	1.14283	116800	0.02832	1.07997	1.07884	0.340106	0.219059	0.248318				2020-05-16	0
2020-05-17	2.87805e+06	0			0	1.3222e+06	9.38762e+06	2.04342e+07	98857.1	1.0765		1	2020-05-17	0.0601005		0	0.319428	0.476985	0.0276107	0.140845	0	432728	1.14793e+07	0.9399	9.38762e+06	1.14283	117100	0.02829	1.07767	1.0765	0.349663	0.214421	0.262102				2020-05-17	0
2020-05-18	2.97972e+06	0			0.3	1.36292e+06	9.67674e+06	2.1156e+07	101668	1.58439		0	2020-05-18	0.0622236		0.4	0.328076	0.472227	0.028461	0.140845	0.4	653808	1.21331e+07	0.937776	9.67674e+06	1.14283	117400	0.02826	1.33044	1.0765	0.357239	0.209202	0.275364				2020-05-18	0
2020-05-19	3.13396e+06	0			0	1.42508e+06	1.01181e+07	2.22511e+07	154242	1.07172		1	2020-05-19	0.0654445		0	0.341801	0.462853	0.029759	0.140845	0	470578	1.26037e+07	0.934555	1.01181e+07	1.14283	117700	0.02823	1.32805	1.07172	0.362645	0.203462	0.287889				2020-05-19	0
2020-05-20	3.24305e+06	0			0.3	1.46789e+06	1.0422e+07	2.30257e+07	109091	1.06804		1	2020-05-20	0.0677226		0	0.350801	0.449111	0.030653	0.140845	0	711839	1.33155e+07	0.932277	1.0422e+07	1.14283	118000	0.0282	1.06988	1.06804	0.365736	0.197265	0.29946				2020-05-20	0
2020-05-21	3.35504e+06	0			0	1.47961e+06	1.05053e+07	2.38208e+07	111983	1.06543		1	2020-05-21	0.0700611		0	0.352331	0.431389	0.0308978	0.140845	0	513303	1.38288e+07	0.929939	1.05053e+07	1.14283	118300	0.02817	1.06673	1.06543	0.366415	0.190679	0.309863				2020-05-21	0
2020-05-22	3.46764e+06	0			0.3	1.51992e+06	1.07914e+07	2.46202e+07	112602	1.06276		1	2020-05-22	0.0724125		0	0.360629	0.410191	0.0317395	0.140845	0	778511	1.46073e+07	0.927588	1.07914e+07	1.14283	118600	0.02814	1.0641	1.06276	0.364639	0.183773	0.318893				2020-05-22	0
2020-05-23	3.58302e+06	0			0	1.52565e+06	1.08321e+07	2.54394e+07	115379	1.06007		1	2020-05-23	0.0748218		0	0.36069	0.386115	0.0318592	0.140845	0	562942	1.51703e+07	0.925178	1.08321e+07	1.14283	118900	0.02811	1.06142	1.06007	0.360423	0.176616	0.326362				2020-05-23	0
2020-05-24	3.69854e+06	0			0	1.56188e+06	1.10894e+07	2.62596e+07	115521	1.05732		1	2020-05-24	0.0772342		0	0.367934	0.359831	0.0326158	0.140845	0	579985	1.57502e+07	0.922766	1.10894e+07	1.14283	119200	0.02808	1.0587	1.05732	0.353835	0.169276	0.332104				2020-05-24	0
2020-05-25	3.8165e+06	0			0.3	1.59815e+06	1.13469e+07	2.70971e+07	117958	1.05456		1	2020-05-25	0.0796974		0	0.375132	0.332041	0.0333732	0.140845	0	881974	1.66322e+07	0.920303	1.13469e+07	1.14283	119500	0.02805	1.05594	1.05456	0.345	0.16182	0.335984				2020-05-25	0
2020-05-26	3.93688e+06	0			0	1.59431e+06	1.13196e+07	2.79518e+07	120382	1.05175		1	2020-05-26	0.0822113		0	0.372894	0.303452	0.033293	0.140845	0	626118	1.72583e+07	0.917789	1.13196e+07	1.14283	119800	0.02802	1.05316	1.05175	0.334094	0.154311	0.337904				2020-05-26	0
2020-05-27	4.05665e+06	0			0.3	1.6259e+06	1.15439e+07	2.88022e+07	119773	1.04887		1	2020-05-27	0.0847124		0	0.378926	0.274742	0.0339527	0.140845	0	951222	1.82096e+07	0.915288	1.15439e+07	1.14283	120100	0.02799	1.05031	1.04887	0.321335	0.146808	0.337802				2020-05-27	0
2020-05-28	4.17846e+06	0			0	1.61374e+06	1.14575e+07	2.96671e+07	121812	1.04602		1	2020-05-28	0.0872562		0	0.374752	0.246529	0.0336987	0.140845	0	675118	1.88847e+07	0.912744	1.14575e+07	1.14283	120400	0.02796	1.04745	1.04602	0.306981	0.139364	0.335659				2020-05-28	0
2020-05-29	4.29904e+06	0			0.3	1.63922e+06	1.16385e+07	3.05232e+07	120571	1.04311		1	2020-05-29	0.089774		0	0.379316	0.219345	0.0342308	0.140845	0	695107	1.95798e+07	0.910226	1.16385e+07	1.14283	120700	0.02793	1.04456	1.04311	0.291317	0.132028	0.3315				2020-05-29	0
2020-05-30	4.42117e+06	0			0	1.66346e+06	1.18105e+07	3.13903e+07	122135	1.04023		1	2020-05-30	0.0923244		0	0.383557	0.193618	0.0347369	0.140845	0	701886	2.02817e+07	0.907676	1.18105e+07	1.14283	121000	0.0279	1.04167	1.04023	0.274644	0.124843	0.325392				2020-05-30	0
2020-05-31	4.54477e+06	0			0	1.6882e+06	1.19862e+07	3.22679e+07	123599	1.03732		1	2020-05-31	0.0949055		0	0.387882	0.169668	0.0352535	0.140845	0	721843	2.10035e+07	0.905095	1.19862e+07	1.14283	121300	0.02787	1.03877	1.03732	0.257272	0.117844	0.317445				2020-05-31	0
2020-06-01	4.66985e+06	0			0.3	1.71161e+06	1.21525e+07	3.3156e+07	125085	1.09579		1	2020-06-01	0.0975175		0.05	0.39187	0.147699	0.0357425	0.140845	0	1.09512e+06	2.20986e+07	0.902482	1.21525e+07	1.14283	121600	0.02784	1.06655	1.09579	0.239506	0.111063	0.307802				2020-06-01	0
2020-06-02	4.80382e+06	0			0	1.69134e+06	1.20085e+07	3.41071e+07	133969	1.09262		1	2020-06-02	0.100315		0.05	0.385859	0.127816	0.0353192	0.140845	0	774549	2.28732e+07	0.899685	1.20085e+07	1.14283	121900	0.02781	1.0942	1.09262	0.221635	0.104524	0.296645				2020-06-02	0
2020-06-03	4.93582e+06	0			0.3	1.71425e+06	1.21712e+07	3.50443e+07	132000	1.08924		1	2020-06-03	0.103072		0.05	0.389704	0.110032	0.0357976	0.140845	0	795078	2.36683e+07	0.896928	1.21712e+07	1.14283	122200	0.02778	1.09093	1.08924	0.203925	0.098248	0.284178				2020-06-03	0
2020-06-04	5.0692e+06	0			0	1.73564e+06	1.2323e+07	3.59913e+07	133373	1.0859		1	2020-06-04	0.105857		0.05	0.393175	0.0942907	0.0362442	0.140845	0	799475	2.44677e+07	0.894143	1.2323e+07	1.14283	122500	0.02775	1.08757	1.0859	0.186613	0.0922486	0.270626				2020-06-04	0
2020-06-05	5.20382e+06	0			0.3	1.75766e+06	1.24794e+07	3.69471e+07	134624	1.08253		1	2020-06-05	0.108668		0.05	0.396762	0.0804839	0.0367041	0.140845	0	819193	2.52869e+07	0.891332	1.24794e+07	1.14283	122800	0.02772	1.08421	1.08253	0.169898	0.0865362	0.256229				2020-06-05	0
2020-06-06	5.33973e+06	0			0	1.77819e+06	1.26251e+07	3.79121e+07	135908	1.07912		1	2020-06-06	0.111506		0.05	0.399984	0.0684682	0.0371328	0.140845	0	820203	2.61071e+07	0.888494	1.26251e+07	1.14283	123100	0.02769	1.08083	1.07912	0.153941	0.0811168	0.241229				2020-06-06	0
2020-06-07	5.47679e+06	0			0	1.79973e+06	1.27781e+07	3.88852e+07	137063	1.07569		1	2020-06-07	0.114368		0.05	0.403408	0.0580811	0.0375826	0.140845	0	837501	2.69446e+07	0.885632	1.27781e+07	1.14283	123400	0.02766	1.07741	1.07569	0.138864	0.0759926	0.225863				2020-06-07	0
2020-06-08	5.61507e+06	0			0.3	1.82006e+06	1.29224e+07	3.9867e+07	138282	1.07222		1	2020-06-08	0.117256		0.05	0.406533	0.0491531	0.038007	0.140845	0	854715	2.77993e+07	0.882744	1.29224e+07	1.14283	123700	0.02763	1.07396	1.07222	0.124753	0.0711626	0.210361				2020-06-08	0
2020-06-09	5.75447e+06	0			0	1.83907e+06	1.30574e+07	4.08567e+07	139393	1.06873		1	2020-06-09	0.120167		0.05	0.409341	0.0415164	0.038404	0.140845	0	850386	2.86497e+07	0.879833	1.30574e+07	1.14283	124000	0.0276	1.07047	1.06873	0.111658	0.0666232	0.194933				2020-06-09	0
2020-06-10	5.89486e+06	0			0.3	1.85968e+06	1.32038e+07	4.18535e+07	140390	1.0652		1	2020-06-10	0.123098		0.05	0.412482	0.0350112	0.0388346	0.140845	0	864865	2.95146e+07	0.876902	1.32038e+07	1.14283	124300	0.02757	1.06696	1.0652	0.0995992	0.0623682	0.179768				2020-06-10	0
2020-06-11	6.03635e+06	0			0	1.87937e+06	1.33435e+07	4.28581e+07	141496	1.06165		1	2020-06-11	0.126053		0.05	0.415392	0.0294896	0.0392456	0.140845	0	856056	3.03706e+07	0.873947	1.33435e+07	1.14283	124600	0.02754	1.06343	1.06165	0.0885716	0.0583896	0.16503				2020-06-11	0
2020-06-12	6.17887e+06	0			0.3	1.90131e+06	1.34993e+07	4.387e+07	142517	1.05808		1	2020-06-12	0.129029		0.05	0.418776	0.0248169	0.0397039	0.140845	0	867158	3.12378e+07	0.870971	1.34993e+07	1.14283	124900	0.02751	1.05986	1.05808	0.0785498	0.0546782	0.150853				2020-06-12	0
2020-06-13	6.32256e+06	0			0	1.92287e+06	1.36524e+07	4.48902e+07	143695	1.05447		1	2020-06-13	0.13203		0.05	0.422049	0.0208729	0.0401541	0.140845	0	877550	3.21154e+07	0.86797	1.36524e+07	1.14283	125200	0.02748	1.05627	1.05447	0.0694926	0.0512232	0.137345				2020-06-13	0
2020-06-14	6.46739e+06	0			0	1.9441e+06	1.38031e+07	4.59185e+07	144830	1.05084		1	2020-06-14	0.135054		0.05	0.425225	0.0175513	0.0405975	0.140845	0	888106	3.30035e+07	0.864946	1.38031e+07	1.14283	125500	0.02745	1.05266	1.05084	0.061348	0.0480132	0.124586				2020-06-14	0
2020-06-15	6.61332e+06	0			0.3	1.96494e+06	1.39511e+07	4.69546e+07	145924	1.04718		1	2020-06-15	0.138102		0.05	0.428289	0.0147592	0.0410327	0.140845	0	951178	3.39546e+07	0.861898	1.39511e+07	1.14283	125800	0.02742	1.04901	1.04718	0.0540563	0.0450362	0.112627				2020-06-15	0
2020-06-16	6.76029e+06	0			0	1.97795e+06	1.40434e+07	4.79981e+07	146975	1.04349		1	2020-06-16	0.141171		0.05	0.429628	0.0124159	0.0413043	0.140845	0	937199	3.48918e+07	0.858829	1.40434e+07	1.14283	126100	0.02739	1.04533	1.04349	0.0475537	0.0422799	0.101498				2020-06-16	0
2020-06-17	6.90772e+06	0			0.3	1.99338e+06	1.4153e+07	4.90448e+07	147426	1.03977		1	2020-06-17	0.144249		0.05	0.431478	0.0104519	0.0416264	0.140845	0	946949	3.58388e+07	0.855751	1.4153e+07	1.14283	126400	0.02736	1.04163	1.03977	0.0417751	0.0397318	0.0912105				2020-06-17	0
2020-06-18	7.05577e+06	0			0	2.00805e+06	1.42572e+07	5.00959e+07	148047	1.03605		1	2020-06-18	0.147341		0.05	0.433149	0.00880762	0.0419328	0.140845	0	955827	3.67946e+07	0.852659	1.42572e+07	1.14283	126700	0.02733	1.03791	1.03605	0.0366556	0.0373796	0.081755				2020-06-18	0
2020-06-19	7.20437e+06	0			0.3	2.02203e+06	1.43564e+07	5.1151e+07	148602	1.0323		1	2020-06-19	0.150444		0.05	0.434657	0.00743219	0.0422247	0.140845	0	964949	3.77596e+07	0.849556	1.43564e+07	1.14283	127000	0.0273	1.03417	1.0323	0.0321323	0.035211	0.0731107				2020-06-19	0
2020-06-20	7.35347e+06	0			0	2.03522e+06	1.445e+07	5.22096e+07	149096	1.02855		1	2020-06-20	0.153558		0.05	0.435981	0.00628252	0.0425001	0.140845	0	973150	3.87327e+07	0.846442	1.445e+07	1.14283	127300	0.02727	1.03042	1.02855	0.0281453	0.0332141	0.0652456				2020-06-20	0
2020-06-21	7.50299e+06	0			0	2.04768e+06	1.45385e+07	5.32712e+07	149522	1.02478		1	2020-06-21	0.15668		0.05	0.437137	0.00532211	0.0427603	0.140845	0	981803	3.97145e+07	0.84332	1.45385e+07	1.14283	127600	0.02724	1.02666	1.02478	0.0246384	0.0313774	0.0581202				2020-06-21	0
2020-06-22	7.65287e+06	0			0.3	2.05928e+06	1.46209e+07	5.43354e+07	149886	1.021		1	2020-06-22	0.15981		0.05	0.4381	0.00452022	0.0430026	0.140845	0	989692	4.07042e+07	0.84019	1.46209e+07	1.14283	127900	0.02721	1.02289	1.021	0.0215596	0.0296896	0.0516897				2020-06-22	0
2020-06-23	7.80305e+06	0			0	2.07007e+06	1.46975e+07	5.54017e+07	150180	1.01721		1	2020-06-23	0.162946		0.05	0.43888	0.00385095	0.0432279	0.140845	0	996769	4.1701e+07	0.837054	1.46975e+07	1.14283	128200	0.02718	1.0191	1.01721	0.0188608	0.0281403	0.0459062				2020-06-23	0
2020-06-24	7.95346e+06	0			0.3	2.08008e+06	1.47686e+07	5.64696e+07	150406	1.01341		1	2020-06-24	0.166087		0.05	0.439488	0.00329257	0.043437	0.140845	0	1.00462e+06	4.27056e+07	0.833913	1.47686e+07	1.14283	128500	0.02715	1.01531	1.01341	0.0164985	0.0267191	0.0407206				2020-06-24	0
2020-06-25	8.10403e+06	0			0	2.08916e+06	1.4833e+07	5.75386e+07	150570	1.00961		1	2020-06-25	0.169231		0.05	0.439891	0.00282686	0.0436265	0.140845	0	1.01187e+06	4.37175e+07	0.830769	1.4833e+07	1.14283	128800	0.02712	1.01151	1.00961	0.0144333	0.0254166	0.0360838				2020-06-25	0
2020-06-26	8.25469e+06	0			0.3	2.0973e+06	1.48908e+07	5.86083e+07	150659	1.0058		1	2020-06-26	0.172377		0.05	0.440092	0.00243854	0.0437966	0.140845	0	1.02024e+06	4.47377e+07	0.827623	1.48908e+07	1.14283	129100	0.02709	1.0077	1.0058	0.0126298	0.0242236	0.0319478				2020-06-26	0
2020-06-27	8.40537e+06	0			0	2.10428e+06	1.49404e+07	5.96781e+07	150676	1.00199		1	2020-06-27	0.175524		0.05	0.440045	0.00211484	0.0439423	0.140845	0	1.02829e+06	4.5766e+07	0.824476	1.49404e+07	1.14283	129400	0.02706	1.0039	1.00199	0.0110563	0.0231317	0.0282664				2020-06-27	0
2020-06-28	8.55597e+06	0			0	2.11006e+06	1.49814e+07	6.07474e+07	150605	0.998182		1	2020-06-28	0.178669		0.05	0.439744	0.00184505	0.0440629	0.140845	0	1.03606e+06	4.68021e+07	0.821331	1.49814e+07	1.14283	129700	0.02703	1.00009	0.998182	0.00968456	0.0221329	0.024996				2020-06-28	0
2020-06-29	8.70642e+06	0			0.3	2.11458e+06	1.50135e+07	6.18155e+07	150444	0.994375		1	2020-06-29	0.18181		0.05	0.439181	0.00162024	0.0441573	0.140845	0	1.04352e+06	4.78456e+07	0.81819	1.50135e+07	1.14283	130000	0.027	0.996279	0.994375	0.00848956	0.0212197	0.0220956				2020-06-29	0
2020-06-30	8.85661e+06	0			0.6	2.11779e+06	1.50363e+07	6.28819e+07	150192	0.990571		1	2020-06-30	0.184947		0.05	0.438349	0.00143293	0.0442245	0.140845	0	1.04673e+06	4.88923e+07	0.815053	1.50363e+07	1.14283	130300	0.02697	0.992473	0.990571	0.00744919	0.0203851	0.0195272				2020-06-30	0
2020-07-01	9.00645e+06	0			0.6	2.12021e+06	1.50535e+07	6.39458e+07	149845	0.986774		1	2020-07-01	0.188076		0.05	0.437354	0.00127688	0.044275	0.140845	0	1.05113e+06	4.99434e+07	0.811924	1.50535e+07	1.14283	130600	0.02694	0.988673	0.986774	0.00654393	0.0196228	0.0172558				2020-07-01	0
2020-07-02	9.15589e+06	0			0.6	2.1216e+06	1.50634e+07	6.50068e+07	149441	0.982986		1	2020-07-02	0.191197		0.05	0.436153	0.0011469	0.0443041	0.140845	0	1.05508e+06	5.09985e+07	0.808803	1.50634e+07	1.14283	130900	0.02691	0.98488	0.982986	0.0057566	0.0189268	0.0152494				2020-07-02	0
2020-07-03	9.30486e+06	0			0.6	2.12197e+06	1.5066e+07	6.60645e+07	148965	0.979208		1	2020-07-03	0.194307		0.05	0.434745	0.00103862	0.0443117	0.140845	0	1.05858e+06	5.20571e+07	0.805693	1.5066e+07	1.14283	131200	0.02688	0.981097	0.979208	0.00507213	0.0182914	0.0134789				2020-07-03	0
2020-07-04	9.45327e+06	0			0.6	2.12129e+06	1.50611e+07	6.71182e+07	148418	0.975441		1	2020-07-04	0.197407		0.05	0.43313	0.000948434	0.0442975	0.140845	0	1.06161e+06	5.31187e+07	0.802593	1.50611e+07	1.14283	131500	0.02685	0.977325	0.975441	0.00447729	0.0177116	0.011918				2020-07-04	0
2020-07-05	9.60107e+06	0			0.6	2.11957e+06	1.50489e+07	6.81676e+07	147799	0.971689		1	2020-07-05	0.200493		0.05	0.431311	0.000873319	0.0442615	0.140845	0	1.06419e+06	5.41829e+07	0.799507	1.50489e+07	1.14283	131800	0.02682	0.973565	0.971689	0.00396051	0.0171826	0.010543				2020-07-05	0
2020-07-06	9.74819e+06	0			0.6	2.11679e+06	1.50292e+07	6.92121e+07	147111	0.967953		1	2020-07-06	0.203565		0.05	0.429287	0.000810759	0.0442036	0.140845	0	1.06628e+06	5.52492e+07	0.796435	1.50292e+07	1.14283	132100	0.02679	0.969821	0.967953	0.00351166	0.0167	0.00933259				2020-07-06	0
2020-07-07	9.89454e+06	0			0.6	2.11296e+06	1.5002e+07	7.02512e+07	146354	1.34255		0	2020-07-07	0.206621		0.4	0.427061	0.000758656	0.0441237	0.140845	0.4	1.06788e+06	5.63171e+07	0.793379	1.5002e+07	1.14283	132400	0.02676	1.15525	0.967953	0.00312192	0.0162599	0.00826774				2020-07-07	0
2020-07-08	1.00972e+07	0			0.3	2.16518e+06	1.53728e+07	7.16899e+07	202625	1.3374		0	2020-07-08	0.210853		0.4	0.436137	0.000715265	0.0452141	0.140845	0.4	1.06905e+06	5.73861e+07	0.789147	1.53728e+07	1.14283	132700	0.02673	1.33997	0.967953	0.00278356	0.0158586	0.00733146				2020-07-08	0
2020-07-09	1.0304e+07	0			0	2.22145e+06	1.57723e+07	7.31584e+07	206836	1.33026		0	2020-07-09	0.215172		0.4	0.44596	0.00067913	0.0463891	0.140845	0.4	1.06968e+06	5.84558e+07	0.784828	1.57723e+07	1.14283	133000	0.0267	1.33383	0.967953	0.00248987	0.0154926	0.00650862				2020-07-09	0
2020-07-10	1.05151e+07	0			0.3	2.28187e+06	1.62013e+07	7.46571e+07	211080	1.32298		0	2020-07-10	0.21958		0.4	0.456545	0.000649039	0.0476508	0.140845	0.4	1.0698e+06	5.95256e+07	0.78042	1.62013e+07	1.14283	133300	0.02667	1.32662	0.967953	0.00223498	0.0151589	0.00578579				2020-07-10	0
2020-07-11	1.07307e+07	0			0	2.34683e+06	1.66625e+07	7.61881e+07	215634	1.31555		0	2020-07-11	0.224083		0.4	0.46796	0.000623981	0.0490073	0.140845	0.4	1.0693e+06	6.05949e+07	0.775917	1.66625e+07	1.14283	133600	0.02664	1.31927	0.967953	0.00201381	0.0148546	0.00515104				2020-07-11	0
2020-07-12	1.09512e+07	0			0	2.41675e+06	1.71589e+07	7.77538e+07	220527	1.30796		0	2020-07-12	0.228688		0.4	0.480282	0.000603114	0.0504674	0.140845	0.4	1.06815e+06	6.1663e+07	0.771312	1.71589e+07	1.14283	133900	0.02661	1.31176	0.967953	0.00182191	0.0145771	0.00459384				2020-07-12	0
2020-07-13	1.1177e+07	0			0.3	2.49209e+06	1.76939e+07	7.93569e+07	225787	1.3002		0	2020-07-13	0.233403		0.4	0.49359	0.000585738	0.0520408	0.140845	0.4	1.06636e+06	6.27294e+07	0.766597	1.76939e+07	1.14283	134200	0.02658	1.30408	0.967953	0.00165542	0.014324	0.00410483				2020-07-13	0
2020-07-14	1.14085e+07	0			0	2.57334e+06	1.82707e+07	8.10002e+07	231444	1.29225		0	2020-07-14	0.238236		0.4	0.507973	0.000571269	0.0537375	0.140845	0.4	1.0639e+06	6.37933e+07	0.761764	1.82707e+07	1.14283	134500	0.02655	1.29622	0.967953	0.00151101	0.0140931	0.0036758				2020-07-14	0
2020-07-15	1.1646e+07	0			0.3	2.66103e+06	1.88933e+07	8.26866e+07	237529	0.922258		1	2020-07-15	0.243196		0.05	0.52352	0.00055922	0.0555686	0.140845	0	1.06103e+06	6.48543e+07	0.756804	1.88933e+07	1.14283	134800	0.02652	1.10725	0.922258	0.00138574	0.0138824	0.00329946				2020-07-15	0
2020-07-16	1.18213e+07	0			0	2.68689e+06	1.90769e+07	8.39312e+07	175297	0.916253		1	2020-07-16	0.246857		0.05	0.526836	0.000549186	0.0561085	0.140845	0	1.05765e+06	6.5912e+07	0.753143	1.90769e+07	1.14283	135100	0.02649	0.919255	0.916253	0.00127709	0.0136901	0.00296941				2020-07-16	0
2020-07-17	1.19971e+07	0			0.6	2.71377e+06	1.92678e+07	8.51797e+07	175848	0.911821		1	2020-07-17	0.250529		0.05	0.530327	0.00054083	0.0566699	0.140845	0	1.05376e+06	6.69657e+07	0.749471	1.92678e+07	1.14283	135400	0.02646	0.914037	0.911821	0.00118286	0.0135145	0.00268001				2020-07-17	0
2020-07-18	1.21739e+07	0			0.6	2.7421e+06	1.94689e+07	8.64346e+07	176748	0.907375		1	2020-07-18	0.25422		0.05	0.534073	0.000533871	0.0572615	0.140845	0	1.04938e+06	6.80151e+07	0.74578	1.94689e+07	1.14283	135700	0.02643	0.909598	0.907375	0.00110114	0.0133542	0.00242629				2020-07-18	0
2020-07-19	1.23516e+07	0			0.6	2.77202e+06	1.96814e+07	8.76965e+07	177722	0.902907		1	2020-07-19	0.257931		0.05	0.538098	0.000528075	0.0578863	0.140845	0	1.04449e+06	6.90596e+07	0.742069	1.96814e+07	1.14283	136000	0.0264	0.905141	0.902907	0.00103027	0.0132077	0.00220388				2020-07-19	0
2020-07-20	1.25304e+07	0			0.6	2.80369e+06	1.99062e+07	8.89658e+07	178777	0.898413		1	2020-07-20	0.261664		0.05	0.54243	0.000523248	0.0585476	0.140845	0	1.03911e+06	7.00987e+07	0.738336	1.99062e+07	1.14283	136300	0.02637	0.90066	0.898413	0.000968822	0.0130737	0.00200894				2020-07-20	0
2020-07-21	1.27103e+07	0			0.6	2.83725e+06	2.01445e+07	9.02432e+07	179919	0.893894		1	2020-07-21	0.265421		0.05	0.547095	0.000519228	0.0592485	0.140845	0	1.43864e+06	7.15374e+07	0.734579	2.01445e+07	1.14283	136600	0.02634	0.896153	0.893894	0.000915534	0.0129512	0.0018381				2020-07-21	0
2020-07-22	1.28915e+07	0			0.6	2.81578e+06	1.99921e+07	9.15294e+07	181157	0.889345		1	2020-07-22	0.269204		0.05	0.541149	0.000515879	0.0588002	0.140845	0	1.46854e+06	7.30059e+07	0.730796	1.99921e+07	1.14283	136900	0.02631	0.891619	0.889345	0.000869327	0.012839	0.00168838				2020-07-22	0
2020-07-23	1.30703e+07	0			0.6	2.78782e+06	1.97935e+07	9.27994e+07	178872	0.884765		1	2020-07-23	0.272939		0.05	0.533993	0.000513089	0.0582162	0.140845	0	1.49866e+06	7.45046e+07	0.727061	1.97935e+07	1.14283	137200	0.02628	0.887055	0.884765	0.000829262	0.0127362	0.0015572				2020-07-23	0
2020-07-24	1.32465e+07	0			0.6	2.75292e+06	1.95458e+07	9.40503e+07	176183	0.880243		1	2020-07-24	0.276619		0.05	0.525558	0.000510764	0.0574875	0.140845	0	1.531e+06	7.60356e+07	0.723381	1.95458e+07	1.14283	137500	0.02625	0.882504	0.880243	0.000794522	0.012642	0.00144225				2020-07-24	0
2020-07-25	1.34196e+07	0			0.6	2.71038e+06	1.92437e+07	9.52792e+07	173089	0.875788		1	2020-07-25	0.280233		0.05	0.515719	0.000508827	0.0565991	0.140845	0	1.56574e+06	7.76013e+07	0.719767	1.92437e+07	1.14283	137800	0.02622	0.878015	0.875788	0.000764401	0.0125556	0.00134155				2020-07-25	0
2020-07-26	1.35892e+07	0			0.6	2.6594e+06	1.88818e+07	9.64831e+07	169551	0.871412		1	2020-07-26	0.283774		0.05	0.504343	0.000507212	0.0555346	0.140845	0	1.60309e+06	7.92044e+07	0.716226	1.88818e+07	1.14283	138100	0.02619	0.8736	0.871412	0.000738284	0.0124762	0.00125333				2020-07-26	0
2020-07-27	1.37547e+07	0			0.6	2.59915e+06	1.84539e+07	9.76583e+07	165531	1.20734		0	2020-07-27	0.28723		0.4	0.491284	0.000505867	0.0542763	0.140845	0.4	1.64325e+06	8.08476e+07	0.71277	1.84539e+07	1.14283	138400	0.02616	1.03938	0.871412	0.00071564	0.0124032	0.00117604				2020-07-27	0
2020-07-28	1.39788e+07	0			0	2.59185e+06	1.84021e+07	9.92498e+07	224147	1.20151		0	2020-07-28	0.291911		0.4	0.488284	0.000504745	0.0541239	0.140845	0.4	1.68646e+06	8.25341e+07	0.708089	1.84021e+07	1.14283	138700	0.02613	1.20443	0.871412	0.000696006	0.0123359	0.00110834				2020-07-28	0
2020-07-29	1.42013e+07	0			0.3	2.57676e+06	1.8295e+07	1.00829e+08	222439	1.19362		0	2020-07-29	0.296556		0.4	0.483837	0.000503809	0.0538088	0.140845	0.4	1.24461e+06	8.37787e+07	0.703444	1.8295e+07	1.14283	139000	0.0261	1.19757	0.871412	0.000678982	0.012274	0.00104903				2020-07-29	0
2020-07-30	1.4421e+07	0			0	2.62115e+06	1.86102e+07	1.02389e+08	219691	1.18579		0	2020-07-30	0.301144		0.4	0.490549	0.000503028	0.0547359	0.140845	0.4	1.24852e+06	8.50272e+07	0.698856	1.86102e+07	1.14283	139300	0.02607	1.18971	0.871412	0.000664222	0.0122168	0.000997082				2020-07-30	0
2020-07-31	1.4643e+07	0			0.3	2.66732e+06	1.89379e+07	1.03965e+08	222010	0.846096		1	2020-07-31	0.30578		0.05	0.497542	0.000502376	0.0556998	0.140845	0	1.25491e+06	8.62821e+07	0.69422	1.89379e+07	1.14283	139600	0.02604	1.01594	0.846096	0.000651424	0.0121639	0.000951579				2020-07-31	0
2020-08-01	1.48042e+07	0			0	2.65177e+06	1.88276e+07	1.0511e+08	161200	0.840483		1	2020-08-01	0.309146		0.05	0.493013	0.000501831	0.0553752	0.140845	0	1.26183e+06	8.7544e+07	0.690854	1.88276e+07	1.14283	139900	0.02601	0.843289	0.840483	0.000640328	0.012115	0.000911724
2020-08-02	1.49634e+07	0			0.6	2.63324e+06	1.8696e+07	1.0624e+08	159198	0.836408		1	2020-08-02	0.312471		0.05	0.487958	0.000501376	0.0549883	0.140845	0	1.26932e+06	8.88133e+07	0.687529	1.8696e+07	1.14283	140200	0.02598	0.838445	0.836408	0.000630706	0.0120696	0.000876816
2020-08-03	1.51207e+07	0			0.6	2.61179e+06	1.85437e+07	1.07357e+08	157319	1.15897		0	2020-08-03	0.315756		0.4	0.48239	0.000500995	0.0545402	0.140845	0.4	1.27743e+06	9.00907e+07	0.684244	1.85437e+07	1.14283	140500	0.02595	0.997687	0.836408	0.000622362	0.0120275	0.000846241
2020-08-04	1.53369e+07	0			0.6	2.64808e+06	1.88014e+07	1.08892e+08	216212	0.828405		1	2020-08-04	0.320271		0.05	0.487487	0.000500677	0.0552981	0.140845	0	1.28622e+06	9.13769e+07	0.679729	1.88014e+07	1.14283	140800	0.02592	0.993686	0.828405	0.000615127	0.0119883	0.000819462
2020-08-05	1.54936e+07	0			0.6	2.62361e+06	1.86277e+07	1.10005e+08	156692	0.822939		1	2020-08-05	0.323543		0.05	0.481399	0.00050041	0.0547872	0.140845	0	1.26999e+06	9.26469e+07	0.676457	1.86277e+07	1.14283	141100	0.02589	0.825672	0.822939	0.000608853	0.0119517	0.000796007
2020-08-06	1.56478e+07	0			0.6	2.59896e+06	1.84526e+07	1.111e+08	154220	0.818978		1	2020-08-06	0.326763		0.05	0.475312	0.000500185	0.0542724	0.140845	0	1.2509e+06	9.38978e+07	0.673237	1.84526e+07	1.14283	141400	0.02586	0.820958	0.818978	0.000603411	0.0119175	0.000775463
2020-08-07	1.57999e+07	0			0.6	2.57481e+06	1.82812e+07	1.12179e+08	152035	0.815079		1	2020-08-07	0.329938		0.05	0.469354	0.000499997	0.0537682	0.140845	0	1.22893e+06	9.51267e+07	0.670062	1.82812e+07	1.14283	141700	0.02583	0.817028	0.815079	0.000598692	0.0118855	0.000757471
2020-08-08	1.59498e+07	0			0.6	2.55163e+06	1.81166e+07	1.13243e+08	149905	0.811235		1	2020-08-08	0.333069		0.05	0.463606	0.000499838	0.053284	0.140845	0	1.20381e+06	9.63306e+07	0.666931	1.81166e+07	1.14283	142000	0.0258	0.813157	0.811235	0.000594599	0.0118555	0.000741711
2020-08-09	1.60976e+07	0			0.6	2.52993e+06	1.79625e+07	1.14293e+08	147855	0.807445		1	2020-08-09	0.336156		0.05	0.458162	0.000499705	0.052831	0.140845	0	1.17527e+06	9.75058e+07	0.663844	1.79625e+07	1.14283	142300	0.02577	0.80934	0.807445	0.000591048	0.0118273	0.000727908
2020-08-10	1.62435e+07	0			0.6	2.51032e+06	1.78232e+07	1.15329e+08	145913	1.11904		0	2020-08-10	0.339203		0.4	0.453124	0.000499591	0.0524213	0.140845	0.4	1.59144e+06	9.90973e+07	0.660797	1.78232e+07	1.14283	142600	0.02574	0.963242	0.807445	0.000587968	0.0118007	0.000715818
2020-08-11	1.64442e+07	0			0.6	2.48682e+06	1.76564e+07	1.16754e+08	200653	1.1139		0	2020-08-11	0.343393		0.4	0.447419	0.000499495	0.0519307	0.140845	0.4	1.57931e+06	1.00677e+08	0.656607	1.76564e+07	1.14283	142900	0.02571	1.11647	0.807445	0.000585295	0.0117756	0.000705228
2020-08-12	1.6642e+07	0			0.3	2.46225e+06	1.7482e+07	1.18159e+08	197863	1.10684		0	2020-08-12	0.347525		0.4	0.441554	0.000499414	0.0514175	0.140845	0.4	1.55981e+06	1.02236e+08	0.652475	1.7482e+07	1.14283	143200	0.02568	1.11037	0.807445	0.000582976	0.0117519	0.000695951
2020-08-13	1.68367e+07	0			0	2.43722e+06	1.73043e+07	1.19541e+08	194665	1.09987		0	2020-08-13	0.35159		0.4	0.435643	0.000499344	0.0508949	0.140845	0.4	1.57627e+06	1.03813e+08	0.64841	1.73043e+07	1.14283	143500	0.02565	1.10336	0.807445	0.000580963	0.0117293	0.000687826
2020-08-14	1.70282e+07	0			0.3	2.40668e+06	1.70875e+07	1.209e+08	191474	1.09302		0	2020-08-14	0.355589		0.4	0.428785	0.000499284	0.0502572	0.140845	0.4	1.14452e+06	1.04957e+08	0.644411	1.70875e+07	1.14283	143800	0.02562	1.09645	0.807445	0.000579216	0.0117078	0.000680707
2020-08-15	1.72161e+07	0			0	2.43338e+06	1.7277e+07	1.22234e+08	187897	1.08628		0	2020-08-15	0.359512		0.4	0.432132	0.000499232	0.0508147	0.140845	0.4	1.1303e+06	1.06087e+08	0.640488	1.7277e+07	1.14283	144100	0.02559	1.08965	0.807445	0.000577699	0.0116874	0.000674471
2020-08-16	1.74049e+07	0			0	2.46299e+06	1.74873e+07	1.23575e+08	188810	1.07967		0	2020-08-16	0.363455		0.4	0.43597	0.000499187	0.0514331	0.140845	0.4	1.11696e+06	1.07204e+08	0.636545	1.74873e+07	1.14283	144400	0.02556	1.08298	0.807445	0.000576381	0.0116678	0.000669007
2020-08-17	1.75948e+07	0			0.3	2.49562e+06	1.77189e+07	1.24923e+08	189944	1.07302		0	2020-08-17	0.367422		0.4	0.440312	0.000499148	0.0521144	0.140845	0.4	1.53511e+06	1.0874e+08	0.632578	1.77189e+07	1.14283	144700	0.02553	1.07634	0.807445	0.000575236	0.0116491	0.00066422
2020-08-18	1.77861e+07	0			0	2.47068e+06	1.75418e+07	1.26281e+08	191275	1.06634		0	2020-08-18	0.371416		0.4	0.434499	0.000499114	0.0515936	0.140845	0.4	1.11251e+06	1.09852e+08	0.628584	1.75418e+07	1.14283	145000	0.0255	1.06968	0.807445	0.000574241	0.0116311	0.000660025
2020-08-19	1.79743e+07	0			0.3	2.50217e+06	1.77654e+07	1.27618e+08	188184	0.761018		1	2020-08-19	0.375346		0.05	0.438612	0.000499084	0.0522513	0.140845	0	1.09496e+06	1.10947e+08	0.624654	1.77654e+07	1.14283	145300	0.02547	0.913677	0.761018	0.000573376	0.0116139	0.000656349
2020-08-20	1.81103e+07	0			0.6	2.48397e+06	1.76362e+07	1.28583e+08	136014	0.756261		1	2020-08-20	0.378186		0.05	0.434012	0.000499056	0.0518711	0.140845	0	1.07945e+06	1.12026e+08	0.621814	1.76362e+07	1.14283	145600	0.02544	0.75864	0.756261	0.000572624	0.0115972	0.000653127
2020-08-21	1.82445e+07	0			0.6	2.46611e+06	1.75094e+07	1.29536e+08	134181	0.752822		1	2020-08-21	0.380988		0.05	0.429499	0.000499032	0.0514982	0.140845	0	1.06433e+06	1.13091e+08	0.619012	1.75094e+07	1.14283	145900	0.02541	0.754541	0.752822	0.000571969	0.0115811	0.000650302
2020-08-22	1.83771e+07	0			0.6	2.44882e+06	1.73866e+07	1.30477e+08	132610	0.74943		1	2020-08-22	0.383757		0.05	0.425109	0.00049901	0.0511371	0.140845	0	1.04977e+06	1.14141e+08	0.616243	1.73866e+07	1.14283	146200	0.02538	0.751126	0.74943	0.000571399	0.0115655	0.000647826
2020-08-23	1.85082e+07	0			0.6	2.43205e+06	1.72676e+07	1.31408e+08	131087	0.746077		1	2020-08-23	0.386495		0.05	0.420836	0.00049899	0.0507869	0.140845	0	1.03598e+06	1.15177e+08	0.613505	1.72676e+07	1.14283	146500	0.02535	0.747753	0.746077	0.000570902	0.0115504	0.000645655
2020-08-24	1.86378e+07	0			0.6	2.41574e+06	1.71518e+07	1.32328e+08	129607	0.742763		1	2020-08-24	0.389201		0.05	0.416666	0.000498971	0.0504464	0.140845	0	1.42464e+06	1.16601e+08	0.610799	1.71518e+07	1.14283	146800	0.02532	0.74442	0.742763	0.000570468	0.0115357	0.00064375
2020-08-25	1.8766e+07	0			0.6	2.34326e+06	1.66371e+07	1.33238e+08	128166	0.739486		1	2020-08-25	0.391877		0.05	0.402862	0.000498954	0.0489327	0.140845	0	1.40483e+06	1.18006e+08	0.608123	1.66371e+07	1.14283	147100	0.02529	0.741125	0.739486	0.00057009	0.0115213	0.000642079
2020-08-26	1.88897e+07	0			0.6	2.26917e+06	1.61111e+07	1.34117e+08	123772	0.736246		1	2020-08-26	0.394462		0.05	0.388868	0.000498938	0.0473855	0.140845	0	1.38212e+06	1.19388e+08	0.605538	1.61111e+07	1.14283	147400	0.02526	0.737866	0.736246	0.000571023	0.0115074	0.000640613
2020-08-27	1.90091e+07	0			0.6	2.19383e+06	1.55762e+07	1.34964e+08	119333	1.02075		0	2020-08-27	0.396954		0.4	0.374749	0.000498923	0.0458124	0.140845	0.4	1.35947e+06	1.20748e+08	0.603046	1.55762e+07	1.14283	147700	0.02523	0.8785	0.736246	0.000572026	0.0114938	0.000639326
2020-08-28	1.9169e+07	0			0.6	2.16231e+06	1.53524e+07	1.361e+08	159955	1.01655		0	2020-08-28	0.400294		0.4	0.368178	0.000498908	0.0451542	0.140845	0.4	1.33407e+06	1.22082e+08	0.599706	1.53524e+07	1.14283	148000	0.0252	1.01865	0.736246	0.000573093	0.0114804	0.000638195
2020-08-29	1.9326e+07	0			0	2.13142e+06	1.51331e+07	1.37215e+08	157008	1.01092		0	2020-08-29	0.403573		0.4	0.361753	0.000498894	0.0445092	0.140845	0.4	1.34055e+06	1.23422e+08	0.596427	1.51331e+07	1.14283	148300	0.02517	1.01374	0.736246	0.000572951	0.0114674	0.000637202
2020-08-30	1.94799e+07	0			0	2.09652e+06	1.48853e+07	1.38308e+08	153907	1.0054		0	2020-08-30	0.406787		0.4	0.354688	0.000498881	0.0437803	0.140845	0.4	1.3486e+06	1.24771e+08	0.593213	1.48853e+07	1.14283	148600	0.02514	1.00816	0.736246	0.000572838	0.0114546	0.00063633
2020-08-31	1.96305e+07	0			0.3	2.05714e+06	1.46057e+07	1.39377e+08	150560	0.999977		0	2020-08-31	0.409931		0.4	0.346909	0.000498868	0.0429579	0.140845	0.4	1.35805e+06	1.26129e+08	0.590069	1.46057e+07	1.14283	148900	0.02511	1.00269	0.736246	0.000571485	0.011442	0.000635562
2020-09-01	1.97774e+07	0			0	2.0128e+06	1.42909e+07	1.4042e+08	146935	0.994678		0	2020-09-01	0.412999		0.4	0.338344	0.000498855	0.042032	0.140845	0.4	1.33611e+06	1.27465e+08	0.587001	1.42909e+07	1.14283	149200	0.02508	0.997328	0.736246	0.000572659	0.0114296	0.000634887
2020-09-02	1.99204e+07	0			0.6	1.96762e+06	1.39701e+07	1.41435e+08	143006	0.989505		0	2020-09-02	0.415986		0.4	0.329692	0.000498843	0.0410885	0.140845	0.4	965701	1.28431e+08	0.584014	1.39701e+07	1.14283	149500	0.02505	0.992091	0.736246	0.000573881	0.0114174	0.000634292
2020-09-03	2.00595e+07	0			0.6	1.97068e+06	1.39918e+07	1.42422e+08	139069	0.984471		0	2020-09-03	0.41889		0.4	0.329148	0.000498831	0.0411523	0.140845	0.4	952682	1.29383e+08	0.58111	1.39918e+07	1.14283	149800	0.02502	0.986988	0.736246	0.000576419	0.0114055	0.000633768
2020-09-04	2.01981e+07	0			0.6	1.97507e+06	1.4023e+07	1.43406e+08	138577	0.979576		0	2020-09-04	0.421783		0.4	0.328828	0.00049882	0.0412441	0.140845	0.4	941533	1.30325e+08	0.578217	1.4023e+07	1.14283	150100	0.02499	0.982024	0.736246	0.00057776	0.0113936	0.000633306
2020-09-05	2.03363e+07	0			0.6	1.98066e+06	1.40627e+07	1.44388e+08	138195	0.700039		1	2020-09-05	0.424669		0.05	0.328705	0.000498808	0.0413608	0.140845	0	930717	1.31256e+08	0.575331	1.40627e+07	1.14283	150400	0.02496	0.839807	0.700039	0.000577865	0.011382	0.000632898
2020-09-06	2.04353e+07	0			0.6	1.94861e+06	1.38351e+07	1.45091e+08	99038.3	0.696545		1	2020-09-06	0.426737		0.05	0.322354	0.000498797	0.0406915	0.140845	0	920209	1.32176e+08	0.573263	1.38351e+07	1.14283	150700	0.02493	0.698292	0.696545	0.000576714	0.0113704	0.000632537
2020-09-07	2.05323e+07	0			0.6	1.91595e+06	1.36032e+07	1.45779e+08	96949.5	0.694041		1	2020-09-07	0.428762		0.05	0.315941	0.000498785	0.0400095	0.140845	0	909979	1.33086e+08	0.571238	1.36032e+07	1.14283	151000	0.0249	0.695293	0.694041	0.000576816	0.011359	0.000632218
2020-09-08	2.06272e+07	0			0.6	1.88277e+06	1.33676e+07	1.46453e+08	94982	0.69159		1	2020-09-08	0.430745		0.05	0.30948	0.000498774	0.0393166	0.140845	0	878780	1.33965e+08	0.569255	1.33676e+07	1.14283	151300	0.02487	0.692816	0.69159	0.00057821	0.0113478	0.000631935
2020-09-09	2.07203e+07	0			0.6	1.852e+06	1.31492e+07	1.47114e+08	93007.3	0.959591		0	2020-09-09	0.432688		0.4	0.303455	0.000498763	0.0386742	0.140845	0.4	847265	1.34812e+08	0.567312	1.31492e+07	1.14283	151600	0.02484	0.82559	0.69159	0.000579644	0.0113366	0.000631684
2020-09-10	2.08472e+07	0			0.6	1.85961e+06	1.32032e+07	1.48015e+08	126940	0.956317		0	2020-09-10	0.435338		0.4	0.303732	0.000498752	0.038833	0.140845	0.4	1.13568e+06	1.35948e+08	0.564662	1.32032e+07	1.14283	151900	0.02481	0.957954	0.69159	0.000581105	0.0113256	0.000631461
2020-09-11	2.09742e+07	0			0.6	1.82668e+06	1.29694e+07	1.48917e+08	127027	0.951848		0	2020-09-11	0.437991		0.4	0.297406	0.000498741	0.0381454	0.140845	0.4	1.11475e+06	1.37062e+08	0.562009	1.29694e+07	1.14283	152200	0.02478	0.954082	0.69159	0.000581296	0.0113146	0.000631262
2020-09-12	2.10984e+07	0			0.6	1.79387e+06	1.27365e+07	1.49799e+08	124194	0.947377		0	2020-09-12	0.440585		0.4	0.291136	0.00049873	0.0374602	0.140845	0.4	1.09274e+06	1.38155e+08	0.559415	1.27365e+07	1.14283	152500	0.02475	0.949612	0.69159	0.000580182	0.0113038	0.000631084
2020-09-13	2.12198e+07	0			0.6	1.76135e+06	1.25056e+07	1.50661e+08	121391	0.943005		0	2020-09-13	0.44312		0.4	0.284952	0.000498719	0.0367812	0.140845	0.4	1.06897e+06	1.39224e+08	0.55688	1.25056e+07	1.14283	152800	0.02472	0.945191	0.69159	0.000579035	0.011293	0.000630925
2020-09-14	2.13384e+07	0			0.6	1.72943e+06	1.2279e+07	1.51503e+08	118640	0.938732		0	2020-09-14	0.445597		0.4	0.278901	0.000498708	0.0361146	0.140845	0.4	1.04324e+06	1.40267e+08	0.554403	1.2279e+07	1.14283	153100	0.02469	0.940868	0.69159	0.000579144	0.0112823	0.000630783
2020-09-15	2.14544e+07	0			0.6	1.69846e+06	1.20591e+07	1.52326e+08	115962	0.934555		0	2020-09-15	0.448019		0.4	0.273038	0.000498697	0.0354678	0.140845	0.4	1.01534e+06	1.41283e+08	0.551981	1.20591e+07	1.14283	153400	0.02466	0.936644	0.69159	0.000580572	0.0112717	0.000630655
2020-09-16	2.15678e+07	0			0.6	1.66883e+06	1.18487e+07	1.53131e+08	113379	0.930473		0	2020-09-16	0.450386		0.4	0.267426	0.000498686	0.0348491	0.140845	0.4	987392	1.4227e+08	0.549614	1.18487e+07	1.14283	153700	0.02463	0.932514	0.69159	0.000580736	0.0112612	0.000630539
2020-09-17	2.16787e+07	0			0.6	1.64068e+06	1.16488e+07	1.53919e+08	110915	0.926482		0	2020-09-17	0.452702		0.4	0.262082	0.000498676	0.0342612	0.140845	0.4	983894	1.43254e+08	0.547298	1.16488e+07	1.14283	154000	0.0246	0.928478	0.69159	0.00058216	0.0112508	0.000630434
2020-09-18	2.17873e+07	0			0.6	1.61068e+06	1.14358e+07	1.5469e+08	108576	0.922578		0	2020-09-18	0.45497		0.4	0.256476	0.000498665	0.0336347	0.140845	0.4	981186	1.44235e+08	0.54503	1.14358e+07	1.14283	154300	0.02457	0.92453	0.69159	0.000582274	0.0112404	0.000630339
2020-09-19	2.18934e+07	0			0.6	1.57862e+06	1.12082e+07	1.55443e+08	106141	0.918756		0	2020-09-19	0.457186		0.4	0.250578	0.000498654	0.0329653	0.140845	0.4	703172	1.44938e+08	0.542814	1.12082e+07	1.14283	154600	0.02454	0.920667	0.69159	0.000581074	0.0112301	0.000630253
2020-09-20	2.1997e+07	0			0.6	1.58318e+06	1.12406e+07	1.56179e+08	103598	0.91502		0	2020-09-20	0.459349		0.4	0.250508	0.000498643	0.0330605	0.140845	0.4	688342	1.45627e+08	0.540651	1.12406e+07	1.14283	154900	0.02451	0.916888	0.69159	0.00057984	0.0112199	0.000630173
2020-09-21	2.21005e+07	0			0.6	1.58971e+06	1.12869e+07	1.56913e+08	103474	0.911373		0	2020-09-21	0.46151		0.4	0.250747	0.000498633	0.0331968	0.140845	0.4	674373	1.46301e+08	0.53849	1.12869e+07	1.14283	155200	0.02448	0.913196	0.69159	0.000579888	0.0112097	0.0006301
2020-09-22	2.2204e+07	0			0.6	1.59821e+06	1.13473e+07	1.57648e+08	103487	0.90773		0	2020-09-22	0.463671		0.4	0.251294	0.000498622	0.0333744	0.140845	0.4	660352	1.46961e+08	0.536329	1.13473e+07	1.14283	155500	0.02445	0.909552	0.69159	0.000581221	0.0111996	0.000630033
2020-09-23	2.23076e+07	0			0.6	1.60883e+06	1.14227e+07	1.58384e+08	103625	0.904088		0	2020-09-23	0.465835		0.4	0.252167	0.000498611	0.0335961	0.140845	0.4	901276	1.47863e+08	0.534165	1.14227e+07	1.14283	155800	0.02442	0.905909	0.69159	0.000581273	0.0111895	0.000629971
2020-09-24	2.24115e+07	0			0.6	1.58578e+06	1.12591e+07	1.59122e+08	103894	0.90044		0	2020-09-24	0.468005		0.4	0.247772	0.0004986	0.0331149	0.140845	0.4	901890	1.48764e+08	0.531995	1.12591e+07	1.14283	156100	0.02439	0.902264	0.69159	0.000582578	0.0111795	0.000629913
2020-09-25	2.25135e+07	0			0.6	1.56075e+06	1.10813e+07	1.59846e+08	101993	0.896783		0	2020-09-25	0.470135		0.4	0.243093	0.00049859	0.0325921	0.140845	0.4	881781	1.49646e+08	0.529865	1.10813e+07	1.14283	156400	0.02436	0.898611	0.69159	0.000582594	0.0111695	0.000629859
2020-09-26	2.26135e+07	0			0.6	1.53653e+06	1.09094e+07	1.60556e+08	99975.1	0.893192		0	2020-09-26	0.472222		0.4	0.238569	0.000498579	0.0320863	0.140845	0.4	861873	1.50508e+08	0.527778	1.09094e+07	1.14283	156700	0.02433	0.894988	0.69159	0.00058132	0.0111596	0.000629808
2020-09-27	2.27115e+07	0			0.6	1.51317e+06	1.07435e+07	1.61252e+08	98029.7	0.889673		0	2020-09-27	0.474269		0.4	0.234204	0.000498568	0.0315985	0.140845	0.4	842345	1.5135e+08	0.525731	1.07435e+07	1.14283	157000	0.0243	0.891433	0.69159	0.000580042	0.0111498	0.00062976
2020-09-28	2.28077e+07	0			0.6	1.49069e+06	1.05839e+07	1.61934e+08	96158.9	0.886222		0	2020-09-28	0.476277		0.4	0.23	0.000498558	0.031129	0.140845	0.4	823332	1.52174e+08	0.523723	1.05839e+07	1.14283	157300	0.02427	0.887948	0.69159	0.000580047	0.01114	0.000629714
2020-09-29	2.2902e+07	0			0.6	1.46909e+06	1.04305e+07	1.62604e+08	94362.8	0.882837		0	2020-09-29	0.478248		0.4	0.225956	0.000498547	0.030678	0.140845	0.4	804990	1.52979e+08	0.521752	1.04305e+07	1.14283	157600	0.02424	0.88453	0.69159	0.000581335	0.0111302	0.000629671
2020-09-30	2.29947e+07	0			0.6	1.44835e+06	1.02833e+07	1.63262e+08	92640.4	0.879516		0	2020-09-30	0.480183		0.4	0.222068	0.000498536	0.0302449	0.140845	0.4	787493	1.53766e+08	0.519817	1.02833e+07	1.14283	157900	0.02421	0.881177	0.69159	0.000581335	0.0111205	0.00062963
2020-10-01	2.30856e+07	0			0.6	1.42842e+06	1.01418e+07	1.63908e+08	90988.9	0.876255		0	2020-10-01	0.482083		0.4	0.218327	0.000498526	0.0298288	0.140845	0.4	770887	1.54537e+08	0.517917	1.01418e+07	1.14283	158200	0.02418	0.877885	0.69159	0.000582616	0.0111108	0.00062959
2020-10-02	2.31751e+07	0			0.6	1.40925e+06	1.00057e+07	1.64543e+08	89404.4	0.873052		0	2020-10-02	0.48395		0.4	0.214722	0.000498515	0.0294285	0.140845	0.4	753601	1.55291e+08	0.51605	1.00057e+07	1.14283	158500	0.02415	0.874653	0.69159	0.000582609	0.0111012	0.000629552
2020-10-03	2.32629e+07	0			0.6	1.39099e+06	9.87605e+06	1.65167e+08	87882.1	0.869905		0	2020-10-03	0.485785		0.4	0.211277	0.000498504	0.0290472	0.140845	0.4	735544	1.56026e+08	0.514215	9.87605e+06	1.14283	158800	0.02412	0.871478	0.69159	0.000581314	0.0110916	0.000629515
2020-10-04	2.33494e+07	0			0.6	1.37383e+06	9.75416e+06	1.6578e+08	86430.8	0.866811		0	2020-10-04	0.48759		0.4	0.208017	0.000498494	0.0286887	0.140845	0.4	734668	1.56761e+08	0.51241	9.75416e+06	1.14283	159100	0.02409	0.868358	0.69159	0.000580017	0.0110821	0.000629479
2020-10-05	2.34344e+07	0			0.6	1.35541e+06	9.62343e+06	1.66384e+08	85060.5	0.863769		0	2020-10-05	0.489366		0.4	0.204587	0.000498483	0.0283042	0.140845	0.4	734756	1.57496e+08	0.510634	9.62343e+06	1.14283	159400	0.02406	0.86529	0.69159	0.000580005	0.0110726	0.000629445
2020-10-06	2.35181e+07	0			0.6	1.33555e+06	9.48241e+06	1.66978e+08	83625.9	0.860774		0	2020-10-06	0.491112		0.4	0.20096	0.000498472	0.0278895	0.140845	0.4	735735	1.58231e+08	0.508888	9.48241e+06	1.14283	159700	0.02403	0.862271	0.69159	0.000581276	0.0110632	0.000629411
2020-10-07	2.36002e+07	0			0.6	1.31404e+06	9.3297e+06	1.67561e+08	82114.9	0.857831		0	2020-10-07	0.492827		0.4	0.197106	0.000498462	0.0274403	0.140845	0.4	737650	1.58969e+08	0.507173	9.3297e+06	1.14283	160000	0.024	0.859302	0.69159	0.000581259	0.0110537	0.000629378
2020-10-08	2.36807e+07	0			0.6	1.29066e+06	9.16371e+06	1.68133e+08	80516.1	0.85494		0	2020-10-08	0.494508		0.4	0.192996	0.000498451	0.0269521	0.140845	0.4	724150	1.59693e+08	0.505492	9.16371e+06	1.14283	160300	0.02397	0.856385	0.69159	0.000582526	0.0110444	0.000629346
2020-10-09	2.37595e+07	0			0.6	1.26749e+06	8.99916e+06	1.68692e+08	78817.1	0.852106		0	2020-10-09	0.496154		0.4	0.188939	0.00049844	0.0264681	0.140845	0.4	709823	1.60403e+08	0.503846	8.99916e+06	1.14283	160600	0.02394	0.853523	0.69159	0.000582507	0.011035	0.000629314
2020-10-10	2.38366e+07	0			0.6	1.24466e+06	8.83707e+06	1.6924e+08	77145.2	0.849331		0	2020-10-10	0.497765		0.4	0.184958	0.00049843	0.0259914	0.140845	0.4	696011	1.61099e+08	0.502235	8.83707e+06	1.14283	160900	0.02391	0.850718	0.69159	0.000581203	0.0110258	0.000629283
2020-10-11	2.39122e+07	0			0.6	1.22214e+06	8.67717e+06	1.69776e+08	75509	0.846616		0	2020-10-11	0.499342		0.4	0.181046	0.000498419	0.0255211	0.140845	0.4	682728	1.61782e+08	0.500658	8.67717e+06	1.14283	161200	0.02388	0.847973	0.69159	0.0005799	0.0110165	0.000629252
2020-10-12	2.39861e+07	0			0.6	1.19988e+06	8.51917e+06	1.70301e+08	73905.7	0.843958		0	2020-10-12	0.500885		0.4	0.177196	0.000498408	0.0250564	0.140845	0.4	669976	1.62452e+08	0.499115	8.51917e+06	1.14283	161500	0.02385	0.845287	0.69159	0.000579881	0.0110073	0.000629222
2020-10-13	2.40584e+07	0			0.6	1.17785e+06	8.36276e+06	1.70815e+08	72332.2	0.841356		0	2020-10-13	0.502396		0.4	0.173402	0.000498398	0.0245963	0.140845	0.4	657747	1.6311e+08	0.497604	8.36276e+06	1.14283	161800	0.02382	0.842657	0.69159	0.000581145	0.0109981	0.000629192
2020-10-14	2.41292e+07	0			0.6	1.156e+06	8.20759e+06	1.71317e+08	70785.3	0.83881		0	2020-10-14	0.503874		0.4	0.169656	0.000498387	0.02414	0.140845	0.4	646022	1.63756e+08	0.496126	8.20759e+06	1.14283	162100	0.02379	0.840083	0.69159	0.000581123	0.010989	0.000629162
2020-10-15	2.41984e+07	0			0.6	1.13427e+06	8.05332e+06	1.71809e+08	69261.6	0.836318		0	2020-10-15	0.50532		0.4	0.16595	0.000498376	0.0236862	0.140845	0.4	634772	1.6439e+08	0.49468	8.05332e+06	1.14283	162400	0.02376	0.837564	0.69159	0.000582384	0.0109799	0.000629132
2020-10-16	2.42662e+07	0			0.6	1.11262e+06	7.89963e+06	1.7229e+08	67757.9	0.83388		0	2020-10-16	0.506735		0.4	0.162278	0.000498366	0.0232342	0.140845	0.4	623963	1.65014e+08	0.493265	7.89963e+06	1.14283	162700	0.02373	0.835099	0.69159	0.000582361	0.0109708	0.000629103
2020-10-17	2.43325e+07	0			0.6	1.09101e+06	7.74619e+06	1.72761e+08	66271.1	0.831495		0	2020-10-17	0.508119		0.4	0.158632	0.000498355	0.0227829	0.140845	0.4	613659	1.65628e+08	0.491881	7.74619e+06	1.14283	163000	0.0237	0.832687	0.69159	0.000581055	0.0109618	0.000629074
2020-10-18	2.43973e+07	0			0.6	1.06938e+06	7.5926e+06	1.73221e+08	64798	0.829162		0	2020-10-18	0.509472		0.4	0.155004	0.000498344	0.0223312	0.140845	0.4	603930	1.66232e+08	0.490528	7.5926e+06	1.14283	163300	0.02367	0.830328	0.69159	0.00057975	0.0109528	0.000629045
2020-10-19	2.44606e+07	0			0.6	1.04765e+06	7.43835e+06	1.7367e+08	63335	0.826881		0	2020-10-19	0.510795		0.4	0.151385	0.000498334	0.0218775	0.140845	0.4	593744	1.66826e+08	0.489205	7.43835e+06	1.14283	163600	0.02364	0.828022	0.69159	0.000579729	0.0109438	0.000629017
2020-10-20	2.45225e+07	0			0.6	1.02591e+06	7.28394e+06	1.7411e+08	61877.6	0.824652		0	2020-10-20	0.512087		0.4	0.147783	0.000498323	0.0214233	0.140845	0.4	583016	1.67409e+08	0.487913	7.28394e+06	1.14283	163900	0.02361	0.825766	0.69159	0.000580989	0.0109349	0.000628988
2020-10-21	2.45829e+07	0			0.6	1.00422e+06	7.12997e+06	1.74539e+08	60429.7	0.822473		0	2020-10-21	0.513349		0.4	0.144212	0.000498312	0.0209705	0.140845	0.4	571664	1.6798e+08	0.486651	7.12997e+06	1.14283	164200	0.02358	0.823562	0.69159	0.000580965	0.010926	0.00062896
2020-10-22	2.46419e+07	0			0.6	982701	6.97718e+06	1.74958e+08	58996.1	0.820346		0	2020-10-22	0.514581		0.4	0.140685	0.000498302	0.0205211	0.140845	0.4	559602	1.6854e+08	0.485419	6.97718e+06	1.14283	164500	0.02355	0.82141	0.69159	0.000582223	0.0109172	0.000628932
2020-10-23	2.46995e+07	0			0.6	961467	6.82641e+06	1.75366e+08	57582.5	0.818269		0	2020-10-23	0.515783		0.4	0.137219	0.000498291	0.0200777	0.140845	0.4	547731	1.69088e+08	0.484217	6.82641e+06	1.14283	164800	0.02352	0.819308	0.69159	0.000582198	0.0109084	0.000628903
2020-10-24	2.47557e+07	0			0.6	940517	6.67767e+06	1.75765e+08	56195.6	0.816242		0	2020-10-24	0.516957		0.4	0.133814	0.000498281	0.0196402	0.140845	0.4	536114	1.69624e+08	0.483043	6.67767e+06	1.14283	165100	0.02349	0.817256	0.69159	0.000580892	0.0108996	0.000628875
2020-10-25	2.48105e+07	0			0.6	919843	6.53088e+06	1.76155e+08	54835	0.814264		0	2020-10-25	0.518102		0.4	0.130469	0.00049827	0.0192085	0.140845	0.4	524731	1.70149e+08	0.481898	6.53088e+06	1.14283	165400	0.02346	0.815253	0.69159	0.000579587	0.0108908	0.000628847
2020-10-26	2.4864e+07	0			0.6	899437	6.386e+06	1.76535e+08	53499.7	0.812334		0	2020-10-26	0.519219		0.4	0.12718	0.000498259	0.0187824	0.140845	0.4	513559	1.70662e+08	0.480781	6.386e+06	1.14283	165700	0.02343	0.813299	0.69159	0.000579565	0.0108821	0.000628819
2020-10-27	2.49162e+07	0			0.6	879293	6.24298e+06	1.76905e+08	52188.8	0.810451		0	2020-10-27	0.520309		0.4	0.123949	0.000498249	0.0183617	0.140845	0.4	502575	1.71165e+08	0.479691	6.24298e+06	1.14283	166000	0.0234	0.811392	0.69159	0.000580823	0.0108735	0.000628791
2020-10-28	2.49671e+07	0			0.6	859410	6.10181e+06	1.77266e+08	50901.7	0.808614		0	2020-10-28	0.521372		0.4	0.120772	0.000498238	0.0179465	0.140845	0.4	491757	1.71656e+08	0.478628	6.10181e+06	1.14283	166300	0.02337	0.809532	0.69159	0.000580798	0.0108648	0.000628763
2020-10-29	2.50167e+07	0			0.6	839786	5.96248e+06	1.77619e+08	49637.9	0.806822		0	2020-10-29	0.522408		0.4	0.117651	0.000498227	0.0175367	0.140845	0.4	481081	1.72137e+08	0.477592	5.96248e+06	1.14283	166600	0.02334	0.807718	0.69159	0.000582054	0.0108562	0.000628736
2020-10-30	2.50651e+07	0			0.6	820425	5.82502e+06	1.77962e+08	48397	0.805075		0	2020-10-30	0.523419		0.4	0.114584	0.000498217	0.0171324	0.140845	0.4	470525	1.72608e+08	0.476581	5.82502e+06	1.14283	166900	0.02331	0.805948	0.69159	0.000582029	0.0108476	0.000628708
2020-10-31	2.51123e+07	0			0.6	801333	5.68946e+06	1.78297e+08	47178.8	0.803371		0	2020-10-31	0.524404		0.4	0.111573	0.000498206	0.0167337	0.140845	0.4	460066	1.73068e+08	0.475596	5.68946e+06	1.14283	167200	0.02328	0.804223	0.69159	0.000580723	0.0108391	0.00062868
2020-11-01	2.51583e+07	0			0.6	782518	5.55588e+06	1.78624e+08	45983.4	0.930803		0	2020-11-01	0.525365		0.6	0.108618	0.000498196	0.0163408	0.140845	0.6	449678	1.73518e+08	0.474635	5.55588e+06	1.14283	167500	0.02325	0.867087	0.69159	0.00057942	0.0108305	0.000628653
2020-11-02	2.52103e+07	0			0.6	771210	5.47559e+06	1.78993e+08	52026.5	0.928924		0	2020-11-02	0.526451		0.6	0.106719	0.000498185	0.0161047	0.140845	0.6	439331	1.73957e+08	0.473549	5.47559e+06	1.14283	167800	0.02322	0.929864	0.69159	0.00058086	0.0108221	0.000628625
2020-11-03	2.52615e+07	0			0.6	760503	5.39957e+06	1.79357e+08	51171.1	0.926798		0	2020-11-03	0.52752		0.6	0.104914	0.000498174	0.0158811	0.140845	0.6	429051	1.74386e+08	0.47248	5.39957e+06	1.14283	168100	0.02319	0.927861	0.69159	0.000582333	0.0108136	0.000628597
2020-11-04	2.53118e+07	0			0.6	750419	5.32797e+06	1.79714e+08	50345.2	0.924706		0	2020-11-04	0.528571		0.6	0.103205	0.000498164	0.0156705	0.140845	0.6	418872	1.74805e+08	0.471429	5.32797e+06	1.14283	168400	0.02316	0.925752	0.69159	0.000582529	0.0108052	0.00062857
2020-11-05	2.53614e+07	0			0.6	740988	5.26102e+06	1.80066e+08	49565.5	0.922649		0	2020-11-05	0.529606		0.6	0.101595	0.000498153	0.0154736	0.140845	0.6	408836	1.75214e+08	0.470394	5.26102e+06	1.14283	168700	0.02313	0.923677	0.69159	0.00058401	0.0107968	0.000628542
2020-11-06	2.54102e+07	0			0.6	732240	5.1989e+06	1.80413e+08	48833.7	0.920623		0	2020-11-06	0.530626		0.6	0.100087	0.000498142	0.0152909	0.140845	0.6	398989	1.75613e+08	0.469374	5.1989e+06	1.14283	169000	0.0231	0.921636	0.69159	0.000584216	0.0107884	0.000628514
2020-11-07	2.54584e+07	0			0.6	724195	5.14179e+06	1.80755e+08	48151.2	0.918627		0	2020-11-07	0.531631		0.6	0.0986839	0.000498132	0.0151229	0.140845	0.6	389328	1.76002e+08	0.468369	5.14179e+06	1.14283	169300	0.02307	0.919625	0.69159	0.000582965	0.0107801	0.000628487
2020-11-08	2.55059e+07	0			0.6	716879	5.08984e+06	1.81092e+08	47519	0.916659		0	2020-11-08	0.532624		0.6	0.0973874	0.000498121	0.0149701	0.140845	0.6	379848	1.76382e+08	0.467376	5.08984e+06	1.14283	169600	0.02304	0.917643	0.69159	0.000584459	0.0107718	0.000628459
2020-11-09	2.55529e+07	0			0.6	710318	5.04325e+06	1.81425e+08	46938.1	0.914717		0	2020-11-09	0.533604		0.6	0.0962002	0.000498111	0.0148331	0.140845	0.6	370540	1.76753e+08	0.466396	5.04325e+06	1.14283	169900	0.02301	0.915688	0.69159	0.000586017	0.0107636	0.000628432
2020-11-10	2.55993e+07	0			0.6	704539	5.00223e+06	1.81755e+08	46410	0.912799		0	2020-11-10	0.534573		0.6	0.0951252	0.0004981	0.0147124	0.140845	0.6	361402	1.77114e+08	0.465427	5.00223e+06	1.14283	170200	0.02298	0.913758	0.69159	0.000587611	0.0107553	0.000628404
2020-11-11	2.56452e+07	0			0.6	699573	4.96697e+06	1.82081e+08	45935.9	0.910902		0	2020-11-11	0.535532		0.6	0.0941654	0.000498089	0.0146087	0.140845	0.6	352429	1.77466e+08	0.464468	4.96697e+06	1.14283	170500	0.02295	0.91185	0.69159	0.000587933	0.0107471	0.000628377
2020-11-12	2.56907e+07	0			0.6	695452	4.93771e+06	1.82404e+08	45517.3	0.909025		0	2020-11-12	0.536483		0.6	0.0933242	0.000498079	0.0145227	0.140845	0.6	343619	1.7781e+08	0.463517	4.93771e+06	1.14283	170800	0.02292	0.909963	0.69159	0.000588262	0.0107389	0.000628349
2020-11-13	2.57359e+07	0			0.6	692211	4.9147e+06	1.82725e+08	45156	0.907164		0	2020-11-13	0.537426		0.6	0.092605	0.000498068	0.014455	0.140845	0.6	334970	1.78145e+08	0.462574	4.9147e+06	1.14283	171100	0.02289	0.908095	0.69159	0.000588569	0.0107308	0.000628322
2020-11-14	2.57807e+07	0			0.6	689886	4.89819e+06	1.83043e+08	44853.5	0.905319		0	2020-11-14	0.538362		0.6	0.0920116	0.000498058	0.0144064	0.140845	0.6	326482	1.78471e+08	0.461638	4.89819e+06	1.14283	171400	0.02286	0.906242	0.69159	0.000588885	0.0107227	0.000628294
2020-11-15	2.58253e+07	0			0.6	688515	4.88845e+06	1.8336e+08	44611.9	0.903486		0	2020-11-15	0.539294		0.6	0.091548	0.000498047	0.0143778	0.140845	0.6	369388	1.78841e+08	0.460706	4.88845e+06	1.14283	171700	0.02283	0.904402	0.69159	0.000590517	0.0107146	0.000628267
2020-11-16	2.58698e+07	0			0.6	680921	4.83454e+06	1.83675e+08	44433.1	0.901662		0	2020-11-16	0.540222		0.6	0.0902616	0.000498036	0.0142192	0.140845	0.6	363315	1.79204e+08	0.459778	4.83454e+06	1.14283	172000	0.0228	0.902574	0.69159	0.000592217	0.0107065	0.00062824
2020-11-17	2.59136e+07	0			0.6	673604	4.78259e+06	1.83987e+08	43854.4	0.899847		0	2020-11-17	0.541137		0.6	0.089019	0.000498026	0.0140664	0.140845	0.6	357451	1.79562e+08	0.458863	4.78259e+06	1.14283	172300	0.02277	0.900754	0.69159	0.00059246	0.0106985	0.000628212
2020-11-18	2.59569e+07	0			0.6	666555	4.73254e+06	1.84294e+08	43295.8	0.898054		0	2020-11-18	0.542042		0.6	0.0878184	0.000498015	0.0139192	0.140845	0.6	351915	1.79914e+08	0.457958	4.73254e+06	1.14283	172600	0.02274	0.89895	0.69159	0.000592675	0.0106905	0.000628185
2020-11-19	2.59997e+07	0			0.6	659747	4.6842e+06	1.84598e+08	42757.3	0.896285		0	2020-11-19	0.542934		0.6	0.0866562	0.000498005	0.0137771	0.140845	0.6	346719	1.8026e+08	0.457066	4.6842e+06	1.14283	172900	0.02271	0.897169	0.69159	0.00059289	0.0106825	0.000628157
2020-11-20	2.60419e+07	0			0.6	653150	4.63737e+06	1.84898e+08	42237.2	0.894537		0	2020-11-20	0.543816		0.6	0.085528	0.000497994	0.0136393	0.140845	0.6	341873	1.80602e+08	0.456184	4.63737e+06	1.14283	173200	0.02268	0.895411	0.69159	0.000593076	0.0106746	0.00062813
2020-11-21	2.60836e+07	0			0.6	646732	4.5918e+06	1.85194e+08	41733.4	0.892811		0	2020-11-21	0.544688		0.6	0.0844293	0.000497983	0.0135053	0.140845	0.6	337385	1.80939e+08	0.455312	4.5918e+06	1.14283	173500	0.02265	0.893674	0.69159	0.000593261	0.0106667	0.000628102
2020-11-22	2.61249e+07	0			0.6	640457	4.54725e+06	1.85487e+08	41243.6	0.891105		0	2020-11-22	0.545549		0.6	0.0833552	0.000497973	0.0133743	0.140845	0.6	333261	1.81273e+08	0.454451	4.54725e+06	1.14283	173800	0.02262	0.891958	0.69159	0.000593479	0.0106588	0.000628075
2020-11-23	2.61657e+07	0			0.6	634284	4.50342e+06	1.85776e+08	40765.3	0.88942		0	2020-11-23	0.546401		0.6	0.0823003	0.000497962	0.0132453	0.140845	0.6	329511	1.81602e+08	0.453599	4.50342e+06	1.14283	174100	0.02259	0.890263	0.69159	0.000593668	0.010651	0.000628048
2020-11-24	2.6206e+07	0			0.6	628170	4.46001e+06	1.86062e+08	40296.1	0.887754		0	2020-11-24	0.547242		0.6	0.0812587	0.000497952	0.0131177	0.140845	0.6	326145	1.81928e+08	0.452758	4.46001e+06	1.14283	174400	0.02256	0.888587	0.69159	0.000593825	0.0106431	0.00062802
2020-11-25	2.62458e+07	0			0.6	622067	4.41668e+06	1.86345e+08	39832.9	0.886107		0	2020-11-25	0.548074		0.6	0.0802243	0.000497941	0.0129902	0.140845	0.6	323173	1.82252e+08	0.451926	4.41668e+06	1.14283	174700	0.02253	0.88693	0.69159	0.000593949	0.0106353	0.000627993
2020-11-26	2.62852e+07	0			0.6	615923	4.37305e+06	1.86625e+08	39372.7	0.884479		0	2020-11-26	0.548896		0.6	0.0791901	0.00049793	0.0128619	0.140845	0.6	320607	1.82572e+08	0.451104	4.37305e+06	1.14283	175000	0.0225	0.885293	0.69159	0.000594068	0.0106276	0.000627966
2020-11-27	2.63241e+07	0			0.6	609679	4.32872e+06	1.86901e+08	38912.2	0.88287		0	2020-11-27	0.549709		0.6	0.0781488	0.00049792	0.0127315	0.140845	0.6	318460	1.82891e+08	0.450291	4.32872e+06	1.14283	175300	0.02247	0.883674	0.69159	0.000594183	0.0106198	0.000627938
2020-11-28	2.63625e+07	0			0.6	603273	4.28324e+06	1.87174e+08	38447.7	0.881279		0	2020-11-28	0.550511		0.6	0.0770925	0.000497909	0.0125978	0.140845	0.6	316745	1.83207e+08	0.449489	4.28324e+06	1.14283	175600	0.02244	0.882075	0.69159	0.000594293	0.0106121	0.000627911
2020-11-29	2.64005e+07	0			0.6	596636	4.23612e+06	1.87444e+08	37975.2	0.879708		0	2020-11-29	0.551304		0.6	0.0760126	0.000497899	0.0124592	0.140845	0.6	315475	1.83523e+08	0.448696	4.23612e+06	1.14283	175900	0.02241	0.880494	0.69159	0.000594398	0.0106044	0.000627884
2020-11-30	2.6438e+07	0			0.6	589694	4.18683e+06	1.8771e+08	37490.4	0.878156		0	2020-11-30	0.552087		0.6	0.0748998	0.000497888	0.0123142	0.140845	0.6	311366	1.83834e+08	0.447913	4.18683e+06	1.14283	176200	0.02238	0.878932	0.69159	0.000594468	0.0105967	0.000627856
2020-12-01	2.6475e+07	0			0.6	582828	4.13808e+06	1.87972e+08	36988.8	0.876624		0	2020-12-01	0.55286		0.6	0.0738029	0.000497878	0.0121708	0.140845	0.6	307400	1.84142e+08	0.44714	4.13808e+06	1.14283	176500	0.02235	0.87739	0.69159	0.0005945	0.0105891	0.000627829
2020-12-02	2.65115e+07	0			0.6	576027	4.08979e+06	1.88231e+08	36494.4	0.875112		0	2020-12-02	0.553622		0.6	0.0727201	0.000497867	0.0120288	0.140845	0.6	303577	1.84445e+08	0.446378	4.08979e+06	1.14283	176800	0.02232	0.875868	0.69159	0.000594527	0.0105815	0.000627802
2020-12-03	2.65475e+07	0			0.6	569276	4.04186e+06	1.88487e+08	36006.3	0.873621		0	2020-12-03	0.554374		0.6	0.0716497	0.000497856	0.0118878	0.140845	0.6	299884	1.84745e+08	0.445626	4.04186e+06	1.14283	177100	0.02229	0.874366	0.69159	0.00059455	0.0105739	0.000627774
2020-12-04	2.6583e+07	0			0.6	562562	3.99419e+06	1.88739e+08	35523.6	0.872149		0	2020-12-04	0.555116		0.6	0.0705898	0.000497846	0.0117476	0.140845	0.6	296307	1.85041e+08	0.444884	3.99419e+06	1.14283	177400	0.02226	0.872885	0.69159	0.000594568	0.0105664	0.000627747
2020-12-05	2.6618e+07	0			0.6	555874	3.94671e+06	1.88988e+08	35045.6	0.870697		0	2020-12-05	0.555847		0.6	0.069539	0.000497835	0.011608	0.140845	0.6	292829	1.85334e+08	0.444153	3.94671e+06	1.14283	177700	0.02223	0.871423	0.69159	0.000594583	0.0105588	0.00062772
2020-12-06	2.66526e+07	0			0.6	549202	3.89934e+06	1.89234e+08	34571.3	0.869265		0	2020-12-06	0.556569		0.6	0.068496	0.000497825	0.0114686	0.140845	0.6	289434	1.85624e+08	0.443431	3.89934e+06	1.14283	178000	0.0222	0.869981	0.69159	0.000594594	0.0105513	0.000627692
2020-12-07	2.66867e+07	0			0.6	542537	3.85201e+06	1.89476e+08	34100.2	0.867852		0	2020-12-07	0.557281		0.6	0.0674596	0.000497814	0.0113294	0.140845	0.6	286102	1.8591e+08	0.442719	3.85201e+06	1.14283	178300	0.02217	0.868559	0.69159	0.0005946	0.0105439	0.000627665
2020-12-08	2.67203e+07	0			0.6	535873	3.80469e+06	1.89714e+08	33631.6	0.866458		0	2020-12-08	0.557984		0.6	0.066429	0.000497804	0.0111903	0.140845	0.6	282814	1.86193e+08	0.442016	3.80469e+06	1.14283	178600	0.02214	0.867155	0.69159	0.000594601	0.0105364	0.000627638
2020-12-09	2.67535e+07	0			0.6	529205	3.75735e+06	1.8995e+08	33165.1	0.865084		0	2020-12-09	0.558676		0.6	0.0654037	0.000497793	0.011051	0.140845	0.6	279546	1.86472e+08	0.441324	3.75735e+06	1.14283	178900	0.02211	0.865771	0.69159	0.000594599	0.010529	0.000627611
2020-12-10	2.67862e+07	0			0.6	522532	3.70998e+06	1.90182e+08	32700.5	0.863728		0	2020-12-10	0.559359		0.6	0.0643835	0.000497782	0.0109117	0.140845	0.6	276277	1.86748e+08	0.440641	3.70998e+06	1.14283	179200	0.02208	0.864406	0.69159	0.000594595	0.0105216	0.000627583
2020-12-11	2.68184e+07	0			0.6	515858	3.66259e+06	1.90411e+08	32237.6	0.862392		0	2020-12-11	0.560032		0.6	0.0633686	0.000497772	0.0107723	0.140845	0.6	272978	1.87021e+08	0.439968	3.66259e+06	1.14283	179500	0.02205	0.86306	0.69159	0.000594587	0.0105142	0.000627556
2020-12-12	2.68502e+07	0			0.6	509187	3.61523e+06	1.90637e+08	31776.5	0.861074		0	2020-12-12	0.560696		0.6	0.0623598	0.000497761	0.010633	0.140845	0.6	269624	1.87291e+08	0.439304	3.61523e+06	1.14283	179800	0.02202	0.861733	0.69159	0.000594576	0.0105069	0.000627529
2020-12-13	2.68815e+07	0			0.6	502529	3.56796e+06	1.90859e+08	31317.7	0.859776		0	2020-12-13	0.56135		0.6	0.0613582	0.000497751	0.010494	0.140845	0.6	266182	1.87557e+08	0.43865	3.56796e+06	1.14283	180100	0.02199	0.860425	0.69159	0.000594563	0.0104995	0.000627502
2020-12-14	2.69124e+07	0			0.6	495900	3.52089e+06	1.91078e+08	30861.6	0.858496		0	2020-12-14	0.561994		0.6	0.0603657	0.00049774	0.0103556	0.140845	0.6	262620	1.8782e+08	0.438006	3.52089e+06	1.14283	180400	0.02196	0.859136	0.69159	0.000594547	0.0104922	0.000627474
2020-12-15	2.69428e+07	0			0.6	489321	3.47418e+06	1.91294e+08	30409.2	0.857235		0	2020-12-15	0.562629		0.6	0.0593846	0.00049773	0.0102182	0.140845	0.6	259110	1.88079e+08	0.437371	3.47418e+06	1.14283	180700	0.02193	0.857865	0.69159	0.000594529	0.010485	0.000627447
2020-12-16	2.69728e+07	0			0.6	482788	3.4278e+06	1.91507e+08	29961.6	0.855992		0	2020-12-16	0.563255		0.6	0.0584147	0.000497719	0.0100818	0.140845	0.6	255645	1.88335e+08	0.436745	3.4278e+06	1.14283	181000	0.0219	0.856613	0.69159	0.00059451	0.0104777	0.00062742
2020-12-17	2.70023e+07	0			0.6	476300	3.38173e+06	1.91716e+08	29518.8	0.854767		0	2020-12-17	0.563871		0.6	0.0574556	0.000497709	0.00994628	0.140845	0.6	252218	1.88587e+08	0.436129	3.38173e+06	1.14283	181300	0.02187	0.855379	0.69159	0.00059449	0.0104705	0.000627393
2020-12-18	2.70314e+07	0			0.6	469857	3.33599e+06	1.91923e+08	29080.4	0.853561		0	2020-12-18	0.564479		0.6	0.0565071	0.000497698	0.00981173	0.140845	0.6	248824	1.88836e+08	0.435521	3.33599e+06	1.14283	181600	0.02184	0.854164	0.69159	0.000594469	0.0104633	0.000627365
2020-12-19	2.706e+07	0			0.6	463458	3.29055e+06	1.92126e+08	28646.6	0.852372		0	2020-12-19	0.565077		0.6	0.0555691	0.000497688	0.0096781	0.140845	0.6	245456	1.89081e+08	0.434923	3.29055e+06	1.14283	181900	0.02181	0.852967	0.69159	0.000594446	0.0104561	0.000627338
2020-12-20	2.70882e+07	0			0.6	457104	3.24544e+06	1.92326e+08	28217.1	0.851202		0	2020-12-20	0.565666		0.6	0.0546417	0.000497677	0.00954541	0.140845	0.6	242111	1.89323e+08	0.434334	3.24544e+06	1.14283	182200	0.02178	0.851787	0.69159	0.000594423	0.010449	0.000627311
2020-12-21	2.7116e+07	0			0.6	450796	3.20065e+06	1.92524e+08	27792	0.850048		0	2020-12-21	0.566247		0.6	0.053725	0.000497666	0.00941368	0.140845	0.6	238784	1.89562e+08	0.433753	3.20065e+06	1.14283	182500	0.02175	0.850625	0.69159	0.0005944	0.0104418	0.000627284
2020-12-22	2.71434e+07	0			0.6	444536	3.1562e+06	1.92718e+08	27371.3	0.848912		0	2020-12-22	0.566818		0.6	0.052819	0.000497656	0.00928295	0.140845	0.6	235472	1.89797e+08	0.433182	3.1562e+06	1.14283	182800	0.02172	0.84948	0.69159	0.000594375	0.0104347	0.000627257
2020-12-23	2.71704e+07	0			0.6	438326	3.11211e+06	1.9291e+08	26955.1	0.847794		0	2020-12-23	0.567381		0.6	0.051924	0.000497645	0.00915327	0.140845	0.6	232173	1.9003e+08	0.432619	3.11211e+06	1.14283	183100	0.02169	0.848353	0.69159	0.00059435	0.0104277	0.000627229
2020-12-24	2.71969e+07	0			0.6	432169	3.0684e+06	1.93098e+08	26543.6	0.846692		0	2020-12-24	0.567935		0.6	0.0510402	0.000497635	0.0090247	0.140845	0.6	228887	1.90258e+08	0.432065	3.0684e+06	1.14283	183400	0.02166	0.847243	0.69159	0.000594325	0.0104206	0.000627202
2020-12-25	2.7223e+07	0			0.6	426068	3.02508e+06	1.93284e+08	26136.7	0.845607		0	2020-12-25	0.568481		0.6	0.0501679	0.000497624	0.0088973	0.140845	0.6	225613	1.90484e+08	0.431519	3.02508e+06	1.14283	183700	0.02163	0.84615	0.69159	0.000594299	0.0104136	0.000627175
2020-12-26	2.72488e+07	0			0.6	420026	2.98218e+06	1.93466e+08	25734.7	0.844539		0	2020-12-26	0.569018		0.6	0.0493074	0.000497614	0.00877113	0.140845	0.6	222356	1.90706e+08	0.430982	2.98218e+06	1.14283	184000	0.0216	0.845073	0.69159	0.000594272	0.0104066	0.000627148
2020-12-27	2.72741e+07	0			0.6	414046	2.93973e+06	1.93646e+08	25337.7	0.843487		0	2020-12-27	0.569548		0.6	0.0484589	0.000497603	0.00864626	0.140845	0.6	219117	1.90926e+08	0.430452	2.93973e+06	1.14283	184300	0.02157	0.844013	0.69159	0.000594246	0.0103996	0.000627121
2020-12-28	2.72991e+07	0			0.6	408130	2.89773e+06	1.93823e+08	24945.9	0.842452		0	2020-12-28	0.570069		0.6	0.0476226	0.000497593	0.00852272	0.140845	0.6	215905	1.91141e+08	0.429931	2.89773e+06	1.14283	184600	0.02154	0.84297	0.69159	0.000594218	0.0103926	0.000627094
2020-12-29	2.73236e+07	0			0.6	402280	2.85619e+06	1.93998e+08	24559.3	0.841432		0	2020-12-29	0.570581		0.6	0.0467986	0.000497582	0.00840056	0.140845	0.6	212728	1.91354e+08	0.429419	2.85619e+06	1.14283	184900	0.02151	0.841942	0.69159	0.000594191	0.0103857	0.000627067
2020-12-30	2.73478e+07	0			0.6	396497	2.81513e+06	1.94169e+08	24178	0.840429		0	2020-12-30	0.571086		0.6	0.0459868	0.000497572	0.00827979	0.140845	0.6	209583	1.91564e+08	0.428914	2.81513e+06	1.14283	185200	0.02148	0.84093	0.69159	0.000594164	0.0103788	0.000627039
2020-12-31	2.73716e+07	0			0.6	390780	2.77454e+06	1.94338e+08	23801.9	0.83944		0	2020-12-31	0.571583		0.6	0.0451872	0.000497561	0.00816041	0.140845	0.6	206471	1.9177e+08	0.428417	2.77454e+06	1.14283	185500	0.02145	0.839935	0.69159	0.000594136	0.0103719	0.000627012
2021-01-01	2.7395e+07	0			0.6	385131	2.73443e+06	1.94505e+08	23431.2	0.838468		0	2021-01-01	0.572073		0.6	0.0443999	0.000497551	0.00804244	0.140845	0.6	203391	1.91974e+08	0.427927	2.73443e+06	1.14283	185800	0.02142	0.838954	0.69159	0.000594108	0.010365	0.000626985
2021-01-02	2.74181e+07	0			0.6	379550	2.6948e+06	1.94668e+08	23065.7	0.83751		0	2021-01-02	0.572554		0.6	0.0436248	0.00049754	0.0079259	0.140845	0.6	200341	1.92174e+08	0.427446	2.6948e+06	1.14283	186100	0.02139	0.837989	0.69159	0.000594451	0.0103582	0.000626958
2021-01-03	2.74408e+07	0			0.6	374038	2.65567e+06	1.9483e+08	22705.5	0.836567		0	2021-01-03	0.573028		0.6	0.0428619	0.00049753	0.0078108	0.140845	0.6	197323	1.92371e+08	0.426972	2.65567e+06	1.14283	186400	0.02136	0.837039	0.69159	0.000594804	0.0103513	0.000626931
2021-01-04	2.74631e+07	0			0.6	368597	2.61704e+06	1.94988e+08	22350.6	0.835639		0	2021-01-04	0.573495		0.6	0.0421113	0.000497519	0.00769717	0.140845	0.6	194336	1.92566e+08	0.426505	2.61704e+06	1.14283	186700	0.02133	0.836103	0.69159	0.000595165	0.0103445	0.000626904
2021-01-05	2.74851e+07	0			0.6	363227	2.57891e+06	1.95145e+08	22001	0.834726		0	2021-01-05	0.573955		0.6	0.0413729	0.000497508	0.00758503	0.140845	0.6	191381	1.92757e+08	0.426045	2.57891e+06	1.14283	187000	0.0213	0.835183	0.69159	0.000595535	0.0103377	0.000626877
2021-01-06	2.75068e+07	0			0.6	357928	2.54129e+06	1.95298e+08	21656.8	0.833827		0	2021-01-06	0.574407		0.6	0.0406467	0.000497498	0.00747439	0.140845	0.6	188459	1.92945e+08	0.425593	2.54129e+06	1.14283	187300	0.02127	0.834276	0.69159	0.000595914	0.010331	0.00062685
2021-01-07	2.75281e+07	0			0.6	352703	2.50419e+06	1.9545e+08	21317.9	0.832942		0	2021-01-07	0.574852		0.6	0.0399329	0.000497487	0.00736526	0.140845	0.6	185571	1.93131e+08	0.425148	2.50419e+06	1.14283	187600	0.02124	0.833384	0.69159	0.000595931	0.0103243	0.000626822
2021-01-08	2.75491e+07	0			0.6	347550	2.46761e+06	1.95599e+08	20984.3	0.83207		0	2021-01-08	0.57529		0.6	0.0392312	0.000497477	0.00725767	0.140845	0.6	182717	1.93314e+08	0.42471	2.46761e+06	1.14283	187900	0.02121	0.832506	0.69159	0.00059632	0.0103175	0.000626795
2021-01-09	2.75698e+07	0			0.6	342472	2.43155e+06	1.95745e+08	20656.2	0.831213		0	2021-01-09	0.575722		0.6	0.0385417	0.000497466	0.00715161	0.140845	0.6	179898	1.93494e+08	0.424278	2.43155e+06	1.14283	188200	0.02118	0.831642	0.69159	0.00059672	0.0103108	0.000626768
2021-01-10	2.75901e+07	0			0.6	337467	2.39602e+06	1.9589e+08	20333.3	0.830369		0	2021-01-10	0.576146		0.6	0.0378644	0.000497456	0.00704711	0.140845	0.6	177116	1.93671e+08	0.423854	2.39602e+06	1.14283	188500	0.02115	0.830791	0.69159	0.000597129	0.0103042	0.000626741
2021-01-11	2.76101e+07	0			0.6	332537	2.36101e+06	1.96032e+08	20015.9	0.829538		0	2021-01-11	0.576564		0.6	0.0371991	0.000497445	0.00694416	0.140845	0.6	174371	1.93845e+08	0.423436	2.36101e+06	1.14283	188800	0.02112	0.829953	0.69159	0.000597548	0.0102975	0.000626714
2021-01-12	2.76298e+07	0			0.6	327682	2.32654e+06	1.96172e+08	19703.7	0.82872		0	2021-01-12	0.576976		0.6	0.0365458	0.000497435	0.00684277	0.140845	0.6	171664	1.94017e+08	0.423024	2.32654e+06	1.14283	189100	0.02109	0.829129	0.69159	0.000597978	0.0102909	0.000626687
2021-01-13	2.76492e+07	0			0.6	322901	2.29259e+06	1.96309e+08	19396.9	0.827914		0	2021-01-13	0.577381		0.6	0.0359044	0.000497424	0.00674292	0.140845	0.6	168994	1.94186e+08	0.422619	2.29259e+06	1.14283	189400	0.02106	0.828317	0.69159	0.000598419	0.0102843	0.00062666
2021-01-14	2.76683e+07	0			0.6	318194	2.25918e+06	1.96445e+08	19095.3	0.827122		0	2021-01-14	0.577779		0.6	0.0352747	0.000497414	0.00664464	0.140845	0.6	166361	1.94352e+08	0.422221	2.25918e+06	1.14283	189700	0.02103	0.827518	0.69159	0.00059887	0.0102777	0.000626633
2021-01-15	2.76871e+07	0			0.6	313562	2.22629e+06	1.96578e+08	18798.9	0.826341		0	2021-01-15	0.578172		0.6	0.0346568	0.000497403	0.00654791	0.140845	0.6	163766	1.94516e+08	0.421828	2.22629e+06	1.14283	190000	0.021	0.826731	0.69159	0.000599333	0.0102711	0.000626606
2021-01-16	2.77056e+07	0			0.6	309004	2.19393e+06	1.9671e+08	18507.8	0.825573		0	2021-01-16	0.578558		0.6	0.0340505	0.000497393	0.00645273	0.140845	0.6	161209	1.94677e+08	0.421442	2.19393e+06	1.14283	190300	0.02097	0.825957	0.69159	0.000599807	0.0102646	0.000626579
2021-01-17	2.77238e+07	0			0.6	304520	2.16209e+06	1.96839e+08	18221.8	0.824816		0	2021-01-17	0.578939		0.6	0.0334557	0.000497382	0.0063591	0.140845	0.6	158689	1.94836e+08	0.421061	2.16209e+06	1.14283	190600	0.02094	0.825195	0.69159	0.000599912	0.0102581	0.000626552
2021-01-18	2.77418e+07	0			0.6	300110	2.13078e+06	1.96967e+08	17940.9	0.824072		0	2021-01-18	0.579314		0.6	0.0328722	0.000497372	0.00626701	0.140845	0.6	156207	1.94992e+08	0.420686	2.13078e+06	1.14283	190900	0.02091	0.824444	0.69159	0.000600012	0.0102516	0.000626525
2021-01-19	2.77594e+07	0			0.6	295775	2.1e+06	1.97092e+08	17665.2	0.823338		0	2021-01-19	0.579683		0.6	0.0323001	0.000497361	0.00617647	0.140845	0.6	153763	1.95146e+08	0.420317	2.1e+06	1.14283	191200	0.02088	0.823705	0.69159	0.000600105	0.0102451	0.000626498
2021-01-20	2.77768e+07	0			0.6	291512	2.06974e+06	1.97216e+08	17394.5	0.822616		0	2021-01-20	0.580046		0.6	0.0317391	0.000497351	0.00608746	0.140845	0.6	151357	1.95297e+08	0.419954	2.06974e+06	1.14283	191500	0.02085	0.822977	0.69159	0.000600192	0.0102386	0.000626471
2021-01-21	2.7794e+07	0			0.6	287323	2.03999e+06	1.97337e+08	17128.8	0.821906		0	2021-01-21	0.580403		0.6	0.0311891	0.00049734	0.00599998	0.140845	0.6	148989	1.95446e+08	0.419597	2.03999e+06	1.14283	191800	0.02082	0.822261	0.69159	0.000600271	0.0102322	0.000626444
2021-01-22	2.78108e+07	0			0.6	283207	2.01077e+06	1.97457e+08	16868	0.821206		0	2021-01-22	0.580756		0.6	0.03065	0.00049733	0.00591403	0.140845	0.6	146659	1.95593e+08	0.419244	2.01077e+06	1.14283	192100	0.02079	0.821556	0.69159	0.000600353	0.0102258	0.000626417
2021-01-23	2.78274e+07	0			0.6	279163	1.98206e+06	1.97575e+08	16612.2	0.820516		0	2021-01-23	0.581103		0.6	0.0301217	0.000497319	0.00582958	0.140845	0.6	144367	1.95737e+08	0.418897	1.98206e+06	1.14283	192400	0.02076	0.820861	0.69159	0.000600427	0.0102194	0.00062639
2021-01-24	2.78438e+07	0			0.6	275191	1.95386e+06	1.97691e+08	16361.3	0.819837		0	2021-01-24	0.581444		0.6	0.0296041	0.000497309	0.00574663	0.140845	0.6	142113	1.95879e+08	0.418556	1.95386e+06	1.14283	192700	0.02073	0.820177	0.69159	0.000600493	0.010213	0.000626363
2021-01-25	2.78599e+07	0			0.6	271290	1.92616e+06	1.97805e+08	16115.1	0.819169		0	2021-01-25	0.581781		0.6	0.0290969	0.000497298	0.00566518	0.140845	0.6	139896	1.96019e+08	0.418219	1.92616e+06	1.14283	193000	0.0207	0.819503	0.69159	0.000600551	0.0102067	0.000626336
2021-01-26	2.78758e+07	0			0.6	267460	1.89897e+06	1.97918e+08	15873.7	0.81851		0	2021-01-26	0.582112		0.6	0.0286001	0.000497288	0.0055852	0.140845	0.6	137718	1.96157e+08	0.417888	1.89897e+06	1.14283	193300	0.02067	0.818839	0.69159	0.000600601	0.0102003	0.000626309
2021-01-27	2.78914e+07	0			0.6	263700	1.87227e+06	1.98029e+08	15637.1	0.817861		0	2021-01-27	0.582439		0.6	0.0281135	0.000497277	0.00550668	0.140845	0.6	135577	1.96292e+08	0.417561	1.87227e+06	1.14283	193600	0.02064	0.818186	0.69159	0.000600641	0.010194	0.000626282
2021-01-28	2.79068e+07	0			0.6	260010	1.84607e+06	1.98139e+08	15405	0.817222		0	2021-01-28	0.58276		0.6	0.027637	0.000497267	0.00542962	0.140845	0.6	133472	1.96426e+08	0.41724	1.84607e+06	1.14283	193900	0.02061	0.817542	0.69159	0.000600672	0.0101877	0.000626255
2021-01-29	2.7922e+07	0			0.6	256389	1.82036e+06	1.98246e+08	15177.6	0.816593		0	2021-01-29	0.583077		0.6	0.0271703	0.000497257	0.005354	0.140845	0.6	131405	1.96557e+08	0.416923	1.82036e+06	1.14283	194200	0.02058	0.816907	0.69159	0.000600694	0.0101814	0.000626228
2021-01-30	2.7937e+07	0			0.6	252836	1.79513e+06	1.98353e+08	14954.6	0.815972		0	2021-01-30	0.58339		0.6	0.0267135	0.000497246	0.0052798	0.140845	0.6	129375	1.96687e+08	0.41661	1.79513e+06	1.14283	194500	0.02055	0.816282	0.69159	0.000600705	0.0101752	0.000626201
2021-01-31	2.79517e+07	0			0.6	249350	1.77038e+06	1.98457e+08	14736.2	0.815361		0	2021-01-31	0.583697		0.6	0.0262662	0.000497236	0.00520701	0.140845	0.6	127381	1.96814e+08	0.416303	1.77038e+06	1.14283	194800	0.02052	0.815667	0.69159	0.000600704	0.0101689	0.000626174
2021-02-01	2.79662e+07	0			0.6	245931	1.74611e+06	1.9856e+08	14522.2	0.899508		0	2021-02-01	0.584001		0.75	0.0258284	0.000497225	0.00513562	0.140845	0.75	125423	1.9694e+08	0.415999	1.74611e+06	1.14283	195100	0.02049	0.857434	0.69159	0.000600702	0.0101627	0.000626147
2021-02-02	2.7982e+07	0			0.6	244067	1.73288e+06	1.98672e+08	15801.2	0.898853		0	2021-02-02	0.584331		0.75	0.0255559	0.000497215	0.0050967	0.140845	0.75	123501	1.97063e+08	0.415669	1.73288e+06	1.14283	195400	0.02046	0.89918	0.69159	0.000600697	0.0101565	0.00062612
2021-02-03	2.79977e+07	0			0.6	242343	1.72063e+06	1.98784e+08	15670	0.89814		0	2021-02-03	0.584658		0.75	0.0252992	0.000497204	0.00506069	0.140845	0.75	121614	1.97185e+08	0.415342	1.72063e+06	1.14283	195700	0.02043	0.898496	0.69159	0.00060069	0.0101503	0.000626093
2021-02-04	2.80132e+07	0			0.6	240761	1.7094e+06	1.98894e+08	15547	0.897433		0	2021-02-04	0.584983		0.75	0.0250588	0.000497194	0.00502766	0.140845	0.75	119763	1.97304e+08	0.415017	1.7094e+06	1.14283	196000	0.0204	0.897786	0.69159	0.00060068	0.0101442	0.000626066
2021-02-05	2.80287e+07	0			0.6	239326	1.69922e+06	1.99004e+08	15433.3	0.896731		0	2021-02-05	0.585305		0.75	0.0248348	0.000497183	0.0049977	0.140845	0.75	117947	1.97422e+08	0.414695	1.69922e+06	1.14283	196300	0.02037	0.897082	0.69159	0.000600669	0.010138	0.000626039
2021-02-06	2.8044e+07	0			0.6	238043	1.69011e+06	1.99112e+08	15329.4	0.896035		0	2021-02-06	0.585625		0.75	0.0246277	0.000497173	0.00497091	0.140845	0.75	116165	1.97539e+08	0.414375	1.69011e+06	1.14283	196600	0.02034	0.896383	0.69159	0.000600655	0.0101319	0.000626012
2021-02-07	2.80592e+07	0			0.6	236918	1.68211e+06	1.99221e+08	15235.4	0.895343		0	2021-02-07	0.585943		0.75	0.0244378	0.000497162	0.0049474	0.140845	0.75	114417	1.97653e+08	0.414057	1.68211e+06	1.14283	196900	0.02031	0.895689	0.69159	0.000600639	0.0101258	0.000625986
2021-02-08	2.80744e+07	0			0.6	235954	1.67527e+06	1.99328e+08	15151.6	0.894656		0	2021-02-08	0.586259		0.75	0.0242655	0.000497152	0.00492727	0.140845	0.75	112704	1.97766e+08	0.413741	1.67527e+06	1.14283	197200	0.02028	0.894999	0.69159	0.000600621	0.0101197	0.000625959
2021-02-09	2.80895e+07	0			0.6	235159	1.66963e+06	1.99435e+08	15078.4	0.893972		0	2021-02-09	0.586574		0.75	0.0241112	0.000497141	0.00491067	0.140845	0.75	111023	1.97877e+08	0.413426	1.66963e+06	1.14283	197500	0.02025	0.894314	0.69159	0.000600602	0.0101136	0.000625932
2021-02-10	2.81045e+07	0			0.6	234538	1.66522e+06	1.99542e+08	15016.1	0.893292		0	2021-02-10	0.586888		0.75	0.0239755	0.000497131	0.0048977	0.140845	0.75	109376	1.97986e+08	0.413112	1.66522e+06	1.14283	197800	0.02022	0.893632	0.69159	0.00060058	0.0101076	0.000625905
2021-02-11	2.81195e+07	0			0.6	234098	1.66209e+06	1.99648e+08	14965	0.892614		0	2021-02-11	0.5872		0.75	0.0238588	0.00049712	0.00488851	0.140845	0.75	107761	1.98094e+08	0.4128	1.66209e+06	1.14283	198100	0.02019	0.892953	0.69159	0.000600558	0.0101016	0.000625878
2021-02-12	2.81344e+07	0			0.6	233846	1.66031e+06	1.99754e+08	14925.6	0.891939		0	2021-02-12	0.587512		0.75	0.0237618	0.00049711	0.00488325	0.140845	0.75	106178	1.982e+08	0.412488	1.66031e+06	1.14283	198400	0.02016	0.892277	0.69159	0.000600534	0.0100955	0.000625851
2021-02-13	2.81493e+07	0			0.6	233789	1.65991e+06	1.9986e+08	14898.3	0.891265		0	2021-02-13	0.587823		0.75	0.0236849	0.000497099	0.00488207	0.140845	0.75	104627	1.98305e+08	0.412177	1.65991e+06	1.14283	198700	0.02013	0.891602	0.69159	0.000600509	0.0100895	0.000625824
2021-02-14	2.81642e+07	0			0.6	233937	1.66095e+06	1.99966e+08	14883.5	0.890593		0	2021-02-14	0.588134		0.75	0.0236288	0.000497089	0.00488515	0.140845	0.75	103107	1.98408e+08	0.411866	1.66095e+06	1.14283	199000	0.0201	0.890929	0.69159	0.000600483	0.0100836	0.000625797
2021-02-15	2.8179e+07	0			0.6	234296	1.6635e+06	2.00071e+08	14881.6	0.889922		0	2021-02-15	0.588445		0.75	0.0235942	0.000497079	0.00489266	0.140845	0.75	112189	1.9852e+08	0.411555	1.6635e+06	1.14283	199300	0.02007	0.890257	0.69159	0.000600457	0.0100776	0.000625771
2021-02-16	2.81939e+07	0			0.6	233388	1.65706e+06	2.00177e+08	14893.2	0.88925		0	2021-02-16	0.588756		0.75	0.0234324	0.000497068	0.00487369	0.140845	0.75	111257	1.98631e+08	0.411244	1.65706e+06	1.14283	199600	0.02004	0.889586	0.69159	0.00060043	0.0100717	0.000625744
2021-02-17	2.82088e+07	0			0.6	232542	1.65105e+06	2.00282e+08	14824.3	0.888578		0	2021-02-17	0.589065		0.75	0.0232775	0.000497058	0.00485603	0.140845	0.75	110384	1.98742e+08	0.410935	1.65105e+06	1.14283	199900	0.02001	0.888914	0.69159	0.000600402	0.0100658	0.000625717
2021-02-18	2.82235e+07	0			0.6	231755	1.64546e+06	2.00387e+08	14759.4	0.887909		0	2021-02-18	0.589374		0.75	0.0231292	0.000497047	0.00483959	0.140845	0.75	109577	1.98851e+08	0.410626	1.64546e+06	1.14283	200200	0.01998	0.888244	0.69159	0.000600374	0.0100598	0.00062569
2021-02-19	2.82382e+07	0			0.6	231020	1.64024e+06	2.00491e+08	14698.4	0.887243		0	2021-02-19	0.589681		0.75	0.0229868	0.000497037	0.00482424	0.140845	0.75	108839	1.9896e+08	0.410319	1.64024e+06	1.14283	200500	0.01995	0.887576	0.69159	0.000600346	0.010054	0.000625663
2021-02-20	2.82529e+07	0			0.6	230331	1.63535e+06	2.00595e+08	14640.8	0.88658		0	2021-02-20	0.589986		0.75	0.0228496	0.000497026	0.00480986	0.140845	0.75	108171	1.99068e+08	0.410014	1.63535e+06	1.14283	200800	0.01992	0.886912	0.69159	0.000600317	0.0100481	0.000625636
2021-02-21	2.82674e+07	0			0.6	229682	1.63074e+06	2.00699e+08	14586.2	0.88592		0	2021-02-21	0.590291		0.75	0.022717	0.000497016	0.00479631	0.140845	0.75	107576	1.99176e+08	0.409709	1.63074e+06	1.14283	201100	0.01989	0.88625	0.69159	0.000600288	0.0100422	0.000625609
2021-02-22	2.8282e+07	0			0.6	229065	1.62636e+06	2.00802e+08	14534.3	0.885261		0	2021-02-22	0.590594		0.75	0.022588	0.000497005	0.00478341	0.140845	0.75	107057	1.99283e+08	0.409406	1.62636e+06	1.14283	201400	0.01986	0.885591	0.69159	0.000600258	0.0100364	0.000625583
2021-02-23	2.82965e+07	0			0.6	228471	1.62214e+06	2.00905e+08	14484.5	0.884606		0	2021-02-23	0.590897		0.75	0.022462	0.000496995	0.00477101	0.140845	0.75	106614	1.99389e+08	0.409103	1.62214e+06	1.14283	201700	0.01983	0.884934	0.69159	0.000600229	0.0100306	0.000625556
2021-02-24	2.83109e+07	0			0.6	227891	1.61803e+06	2.01007e+08	14436.2	0.883952		0	2021-02-24	0.591198		0.75	0.0223378	0.000496985	0.0047589	0.140845	0.75	106252	1.99496e+08	0.408802	1.61803e+06	1.14283	202000	0.0198	0.884279	0.69159	0.000600199	0.0100248	0.000625529
2021-02-25	2.83253e+07	0			0.6	227315	1.61394e+06	2.0111e+08	14388.9	0.883301		0	2021-02-25	0.591499		0.75	0.0222146	0.000496974	0.00474687	0.140845	0.75	105972	1.99602e+08	0.408501	1.61394e+06	1.14283	202300	0.01977	0.883626	0.69159	0.000600169	0.010019	0.000625502
2021-02-26	2.83396e+07	0			0.6	226731	1.60979e+06	2.01211e+08	14342	0.882651		0	2021-02-26	0.591798		0.75	0.0220912	0.000496964	0.00473468	0.140845	0.75	105778	1.99707e+08	0.408202	1.60979e+06	1.14283	202600	0.01974	0.882976	0.69159	0.000600138	0.0100133	0.000625475
2021-02-27	2.83539e+07	0			0.6	226128	1.60551e+06	2.01313e+08	14294.6	0.882004		0	2021-02-27	0.592097		0.75	0.0219664	0.000496953	0.00472208	0.140845	0.75	105673	1.99813e+08	0.407903	1.60551e+06	1.14283	202900	0.01971	0.882328	0.69159	0.000600108	0.0100075	0.000625449
2021-02-28	2.83682e+07	0			0.6	225490	1.60098e+06	2.01414e+08	14246.1	0.881359		0	2021-02-28	0.592394		0.75	0.0218388	0.000496943	0.00470877	0.140845	0.75	105659	1.99919e+08	0.407606	1.60098e+06	1.14283	203200	0.01968	0.881682	0.69159	0.000600077	0.0100018	0.000625422
2021-03-01	2.83824e+07	0			0.6	224804	1.59611e+06	2.01515e+08	14195.6	0.880717		0	2021-03-01	0.592691		0.75	0.0217071	0.000496932	0.00469444	0.140845	0.75	105742	2.00024e+08	0.407309	1.59611e+06	1.14283	203500	0.01965	0.881038	0.69159	0.000600047	0.00999606	0.000625395
2021-03-02	2.83965e+07	0			0.6	224053	1.59078e+06	2.01615e+08	14142.1	0.880076		0	2021-03-02	0.592986		0.75	0.0215698	0.000496922	0.00467875	0.140845	0.75	105253	2.0013e+08	0.407014	1.59078e+06	1.14283	203800	0.01962	0.880396	0.69159	0.000600016	0.00999037	0.000625368
2021-03-03	2.84106e+07	0			0.6	223313	1.58552e+06	2.01715e+08	14084.6	0.879438		0	2021-03-03	0.59328		0.75	0.0214341	0.000496912	0.00466331	0.140845	0.75	104792	2.00235e+08	0.40672	1.58552e+06	1.14283	204100	0.01959	0.879757	0.69159	0.000599985	0.00998469	0.000625342
2021-03-04	2.84246e+07	0			0.6	222582	1.58033e+06	2.01815e+08	14027.9	0.878802		0	2021-03-04	0.593573		0.75	0.0212999	0.000496901	0.00464803	0.140845	0.75	104359	2.00339e+08	0.406427	1.58033e+06	1.14283	204400	0.01956	0.87912	0.69159	0.000599954	0.00997903	0.000625315
2021-03-05	2.84386e+07	0			0.6	221855	1.57517e+06	2.01914e+08	13971.8	0.87817		0	2021-03-05	0.593865		0.75	0.0211667	0.000496891	0.00463286	0.140845	0.75	103950	2.00443e+08	0.406135	1.57517e+06	1.14283	204700	0.01953	0.878486	0.69159	0.000599923	0.00997338	0.000625288
2021-03-06	2.84525e+07	0			0.6	221131	1.57003e+06	2.02013e+08	13916.2	0.877539		0	2021-03-06	0.594155		0.75	0.0210344	0.00049688	0.00461773	0.140845	0.75	103562	2.00546e+08	0.405845	1.57003e+06	1.14283	205000	0.0195	0.877854	0.69159	0.000599892	0.00996775	0.000625261
2021-03-07	2.84664e+07	0			0.6	220405	1.56488e+06	2.02111e+08	13860.8	0.876911		0	2021-03-07	0.594445		0.75	0.0209025	0.00049687	0.00460258	0.140845	0.75	103193	2.0065e+08	0.405555	1.56488e+06	1.14283	205300	0.01947	0.877225	0.69159	0.000599861	0.00996214	0.000625235
2021-03-08	2.84802e+07	0			0.6	219676	1.5597e+06	2.02209e+08	13805.4	0.876286		0	2021-03-08	0.594733		0.75	0.0207709	0.000496859	0.00458736	0.140845	0.75	102840	2.00752e+08	0.405267	1.5597e+06	1.14283	205600	0.01944	0.876598	0.69159	0.00059983	0.00995654	0.000625208
2021-03-09	2.84939e+07	0			0.6	218942	1.55449e+06	2.02307e+08	13749.9	0.875663		0	2021-03-09	0.59502		0.75	0.0206394	0.000496849	0.00457202	0.140845	0.75	102497	2.00855e+08	0.40498	1.55449e+06	1.14283	205900	0.01941	0.875974	0.69159	0.000599799	0.00995096	0.000625181
2021-03-10	2.85076e+07	0			0.6	218200	1.54922e+06	2.02404e+08	13694.2	0.875042		0	2021-03-10	0.595306		0.75	0.0205078	0.000496839	0.00455652	0.140845	0.75	102161	2.00957e+08	0.404694	1.54922e+06	1.14283	206200	0.01938	0.875353	0.69159	0.000599767	0.0099454	0.000625154
2021-03-11	2.85213e+07	0			0.6	217449	1.54389e+06	2.02501e+08	13638.1	0.874425		0	2021-03-11	0.595591		0.75	0.020376	0.000496828	0.00454084	0.140845	0.75	101828	2.01059e+08	0.404409	1.54389e+06	1.14283	206500	0.01935	0.874734	0.69159	0.000599736	0.00993985	0.000625128
2021-03-12	2.85348e+07	0			0.6	216689	1.53849e+06	2.02597e+08	13581.6	0.873809		0	2021-03-12	0.595875		0.75	0.0202438	0.000496818	0.00452497	0.140845	0.75	101492	2.0116e+08	0.404125	1.53849e+06	1.14283	206800	0.01932	0.874117	0.69159	0.000599705	0.00993432	0.000625101
2021-03-13	2.85484e+07	0			0.6	215919	1.53302e+06	2.02693e+08	13524.6	0.873196		0	2021-03-13	0.596157		0.75	0.0201114	0.000496807	0.00450889	0.140845	0.75	101147	2.01262e+08	0.403843	1.53302e+06	1.14283	207100	0.01929	0.873503	0.69159	0.000599674	0.00992881	0.000625074
2021-03-14	2.85618e+07	0			0.6	215140	1.52749e+06	2.02789e+08	13467.1	0.872586		0	2021-03-14	0.596438		0.75	0.0199787	0.000496797	0.00449262	0.140845	0.75	100789	2.01362e+08	0.403562	1.52749e+06	1.14283	207400	0.01926	0.872891	0.69159	0.000599642	0.00992331	0.000625048
2021-03-15	2.85752e+07	0			0.6	214353	1.52191e+06	2.02884e+08	13409.1	0.871979		0	2021-03-15	0.596718		0.75	0.019846	0.000496787	0.0044762	0.140845	0.75	100409	2.01463e+08	0.403282	1.52191e+06	1.14283	207700	0.01923	0.872282	0.69159	0.000599611	0.00991783	0.000625021
2021-03-16	2.85886e+07	0			0.6	213562	1.51629e+06	2.02979e+08	13350.8	0.871374		0	2021-03-16	0.596997		0.75	0.0197134	0.000496776	0.00445967	0.140845	0.75	100000	2.01563e+08	0.403003	1.51629e+06	1.14283	208000	0.0192	0.871676	0.69159	0.00059958	0.00991236	0.000624994
2021-03-17	2.86019e+07	0			0.6	212770	1.51066e+06	2.03073e+08	13292.3	0.870771		0	2021-03-17	0.597275		0.75	0.0195813	0.000496766	0.00444313	0.140845	0.75	99597.9	2.01662e+08	0.402725	1.51066e+06	1.14283	208300	0.01917	0.871072	0.69159	0.000599548	0.00990691	0.000624968
2021-03-18	2.86151e+07	0			0.6	211976	1.50503e+06	2.03167e+08	13233.8	0.870171		0	2021-03-18	0.597551		0.75	0.0194497	0.000496755	0.00442655	0.140845	0.75	99199.9	2.01762e+08	0.402449	1.50503e+06	1.14283	208600	0.01914	0.870471	0.69159	0.000599517	0.00990147	0.000624941
2021-03-19	2.86283e+07	0			0.6	211179	1.49937e+06	2.03261e+08	13175.4	0.869574		0	2021-03-19	0.597826		0.75	0.0193185	0.000496745	0.00440992	0.140845	0.75	98804.8	2.0186e+08	0.402174	1.49937e+06	1.14283	208900	0.01911	0.869873	0.69159	0.000599486	0.00989605	0.000624914
2021-03-20	2.86414e+07	0			0.6	210380	1.4937e+06	2.03354e+08	13116.8	0.86898		0	2021-03-20	0.5981		0.75	0.0191876	0.000496735	0.00439322	0.140845	0.75	98411.4	2.01959e+08	0.4019	1.4937e+06	1.14283	209200	0.01908	0.869277	0.69159	0.000599455	0.00989065	0.000624887
2021-03-21	2.86545e+07	0			0.6	209577	1.488e+06	2.03447e+08	13058.3	0.868388		0	2021-03-21	0.598373		0.75	0.019057	0.000496724	0.00437647	0.140845	0.75	98018.4	2.02057e+08	0.401627	1.488e+06	1.14283	209500	0.01905	0.868684	0.69159	0.000599423	0.00988526	0.000624861
2021-03-22	2.86675e+07	0			0.6	208771	1.48228e+06	2.03539e+08	12999.6	0.867799		0	2021-03-22	0.598644		0.75	0.0189268	0.000496714	0.00435964	0.140845	0.75	97624.5	2.02154e+08	0.401356	1.48228e+06	1.14283	209800	0.01902	0.868093	0.69159	0.000599392	0.00987988	0.000624834
2021-03-23	2.86804e+07	0			0.6	207962	1.47653e+06	2.03631e+08	12940.8	0.867212		0	2021-03-23	0.598915		0.75	0.0187968	0.000496703	0.00434274	0.140845	0.75	97229	2.02252e+08	0.401085	1.47653e+06	1.14283	210100	0.01899	0.867505	0.69159	0.000599361	0.00987453	0.000624808
2021-03-24	2.86933e+07	0			0.6	207150	1.47077e+06	2.03722e+08	12882	0.866628		0	2021-03-24	0.599184		0.75	0.0186671	0.000496693	0.00432578	0.140845	0.75	96830.8	2.02348e+08	0.400816	1.47077e+06	1.14283	210400	0.01896	0.86692	0.69159	0.000599329	0.00986918	0.000624781
2021-03-25	2.87061e+07	0			0.6	206335	1.46498e+06	2.03813e+08	12823	0.866047		0	2021-03-25	0.599451		0.75	0.0185378	0.000496683	0.00430876	0.140845	0.75	96429.5	2.02445e+08	0.400549	1.46498e+06	1.14283	210700	0.01893	0.866338	0.69159	0.000599298	0.00986385	0.000624754
2021-03-26	2.87189e+07	0			0.6	205517	1.45917e+06	2.03904e+08	12764	0.865468		0	2021-03-26	0.599718		0.75	0.0184089	0.000496672	0.00429169	0.140845	0.75	96024.7	2.02541e+08	0.400282	1.45917e+06	1.14283	211000	0.0189	0.865758	0.69159	0.000599267	0.00985854	0.000624728
2021-03-27	2.87316e+07	0			0.6	204698	1.45335e+06	2.03994e+08	12704.9	0.864893		0	2021-03-27	0.599983		0.75	0.0182804	0.000496662	0.00427457	0.140845	0.75	95616.4	2.02637e+08	0.400017	1.45335e+06	1.14283	211300	0.01887	0.86518	0.69159	0.000599235	0.00985324	0.000624701
2021-03-28	2.87442e+07	0			0.6	203876	1.44752e+06	2.04084e+08	12645.8	0.864319		0	2021-03-28	0.600247		0.75	0.0181523	0.000496651	0.00425742	0.140845	0.75	95204.8	2.02732e+08	0.399753	1.44752e+06	1.14283	211600	0.01884	0.864606	0.69159	0.000599204	0.00984796	0.000624674
2021-03-29	2.87568e+07	0			0.6	203054	1.44168e+06	2.04173e+08	12586.7	0.863749		0	2021-03-29	0.60051		0.75	0.0180248	0.000496641	0.00424024	0.140845	0.75	94790.7	2.02827e+08	0.39949	1.44168e+06	1.14283	211900	0.01881	0.864034	0.69159	0.000599173	0.00984269	0.000624648
2021-03-30	2.87693e+07	0			0.6	202231	1.43584e+06	2.04262e+08	12527.7	0.863181		0	2021-03-30	0.600772		0.75	0.0178977	0.000496631	0.00422306	0.140845	0.75	94375.3	2.02921e+08	0.399228	1.43584e+06	1.14283	212200	0.01878	0.863465	0.69159	0.000599141	0.00983744	0.000624621
2021-03-31	2.87818e+07	0			0.6	201407	1.42999e+06	2.04351e+08	12468.7	0.862615		0	2021-03-31	0.601032		0.75	0.0177712	0.00049662	0.00420586	0.140845	0.75	93960.2	2.03015e+08	0.398968	1.42999e+06	1.14283	212500	0.01875	0.862898	0.69159	0.00059911	0.0098322	0.000624595
2021-04-01	2.87942e+07	0			0.6	200583	1.42414e+06	2.04439e+08	12409.8	0.862053		0	2021-04-01	0.601291		0.75	0.0176453	0.00049661	0.00418865	0.140845	0.75	93545.1	2.03108e+08	0.398709	1.42414e+06	1.14283	212800	0.01872	0.862334	0.69159	0.000599079	0.00982698	0.000624568
2021-04-02	2.88066e+07	0			0.6	199759	1.41829e+06	2.04527e+08	12351	0.861493		0	2021-04-02	0.601549		0.75	0.0175199	0.000496599	0.00417143	0.140845	0.75	93129.6	2.03202e+08	0.398451	1.41829e+06	1.14283	213100	0.01869	0.861773	0.69159	0.000599048	0.00982177	0.000624541
2021-04-03	2.88189e+07	0			0.6	198934	1.41243e+06	2.04614e+08	12292.2	0.860936		0	2021-04-03	0.601806		0.75	0.0173951	0.000496589	0.00415421	0.140845	0.75	92713.7	2.03294e+08	0.398194	1.41243e+06	1.14283	213400	0.01866	0.861214	0.69159	0.000599016	0.00981658	0.000624515
2021-04-04	2.88311e+07	0			0.6	198109	1.40658e+06	2.04701e+08	12233.5	0.860381		0	2021-04-04	0.602061		0.75	0.0172708	0.000496579	0.00413699	0.140845	0.75	92297.1	2.03387e+08	0.397939	1.40658e+06	1.14283	213700	0.01863	0.860658	0.69159	0.000598985	0.0098114	0.000624488
2021-04-05	2.88433e+07	0			0.6	197285	1.40072e+06	2.04787e+08	12175	0.859829		0	2021-04-05	0.602315		0.75	0.0171472	0.000496568	0.00411977	0.140845	0.75	91879.9	2.03478e+08	0.397685	1.40072e+06	1.14283	214000	0.0186	0.860105	0.69159	0.000598954	0.00980623	0.000624462
2021-04-06	2.88554e+07	0			0.6	196460	1.39487e+06	2.04873e+08	12116.5	0.85928		0	2021-04-06	0.602569		0.75	0.0170241	0.000496558	0.00410256	0.140845	0.75	91461.9	2.0357e+08	0.397431	1.39487e+06	1.14283	214300	0.01857	0.859554	0.69159	0.000598923	0.00980108	0.000624435
2021-04-07	2.88675e+07	0			0.6	195637	1.38902e+06	2.04959e+08	12058.2	0.858733		0	2021-04-07	0.60282		0.75	0.0169017	0.000496548	0.00408535	0.140845	0.75	91043.4	2.03661e+08	0.39718	1.38902e+06	1.14283	214600	0.01854	0.859006	0.69159	0.000598891	0.00979595	0.000624409
2021-04-08	2.88795e+07	0			0.6	194814	1.38318e+06	2.05044e+08	12000	0.858189		0	2021-04-08	0.603071		0.75	0.0167799	0.000496537	0.00406817	0.140845	0.75	90624.3	2.03752e+08	0.396929	1.38318e+06	1.14283	214900	0.01851	0.858461	0.69159	0.00059886	0.00979083	0.000624382
2021-04-09	2.88914e+07	0			0.6	193992	1.37734e+06	2.05129e+08	11941.9	0.857647		0	2021-04-09	0.60332		0.75	0.0166588	0.000496527	0.004051	0.140845	0.75	90204.9	2.03842e+08	0.39668	1.37734e+06	1.14283	215200	0.01848	0.857918	0.69159	0.000598829	0.00978572	0.000624355
2021-04-10	2.89033e+07	0			0.6	193171	1.37151e+06	2.05213e+08	11884	0.857109		0	2021-04-10	0.603568		0.75	0.0165383	0.000496516	0.00403386	0.140845	0.75	89785.3	2.03932e+08	0.396432	1.37151e+06	1.14283	215500	0.01845	0.857378	0.69159	0.000598798	0.00978063	0.000624329
2021-04-11	2.89151e+07	0			0.6	192351	1.36569e+06	2.05297e+08	11826.3	0.856572		0	2021-04-11	0.603815		0.75	0.0164185	0.000496506	0.00401675	0.140845	0.75	89365.8	2.04021e+08	0.396185	1.36569e+06	1.14283	215800	0.01842	0.856841	0.69159	0.000598767	0.00977555	0.000624302
2021-04-12	2.89269e+07	0			0.6	191533	1.35989e+06	2.05381e+08	11768.8	0.856039		0	2021-04-12	0.604061		0.75	0.0162994	0.000496496	0.00399966	0.140845	0.75	88946.6	2.0411e+08	0.395939	1.35989e+06	1.14283	216100	0.01839	0.856306	0.69159	0.000598735	0.00977048	0.000624276
2021-04-13	2.89386e+07	0			0.6	190717	1.35409e+06	2.05464e+08	11711.4	0.855508		0	2021-04-13	0.604306		0.75	0.016181	0.000496485	0.00398262	0.140845	0.75	88527.8	2.04198e+08	0.395694	1.35409e+06	1.14283	216400	0.01836	0.855773	0.69159	0.000598704	0.00976543	0.000624249
2021-04-14	2.89502e+07	0			0.6	189903	1.34831e+06	2.05547e+08	11654.3	0.854979		0	2021-04-14	0.604549		0.75	0.0160633	0.000496475	0.00396561	0.140845	0.75	88109.5	2.04286e+08	0.395451	1.34831e+06	1.14283	216700	0.01833	0.855244	0.69159	0.000598673	0.00976039	0.000624223
2021-04-15	2.89618e+07	0			0.6	189090	1.34254e+06	2.05629e+08	11597.3	0.854454		0	2021-04-15	0.604791		0.75	0.0159463	0.000496465	0.00394865	0.140845	0.75	87691.8	2.04374e+08	0.395209	1.34254e+06	1.14283	217000	0.0183	0.854716	0.69159	0.000598642	0.00975537	0.000624196
2021-04-16	2.89734e+07	0			0.6	188280	1.33679e+06	2.05711e+08	11540.6	0.85393		0	2021-04-16	0.605032		0.75	0.0158301	0.000496454	0.00393172	0.140845	0.75	87274.6	2.04461e+08	0.394968	1.33679e+06	1.14283	217300	0.01827	0.854192	0.69159	0.000598611	0.00975036	0.00062417
2021-04-17	2.89849e+07	0			0.6	187472	1.33105e+06	2.05793e+08	11484.1	0.85341		0	2021-04-17	0.605272		0.75	0.0157145	0.000496444	0.00391485	0.140845	0.75	86858.1	2.04548e+08	0.394728	1.33105e+06	1.14283	217600	0.01824	0.85367	0.69159	0.000598579	0.00974536	0.000624143
2021-04-18	2.89963e+07	0			0.6	186666	1.32533e+06	2.05874e+08	11427.9	0.852891		0	2021-04-18	0.605511		0.75	0.0155998	0.000496434	0.00389803	0.140845	0.75	86442.3	2.04635e+08	0.394489	1.32533e+06	1.14283	217900	0.01821	0.85315	0.69159	0.000598548	0.00974038	0.000624117
2021-04-19	2.90077e+07	0			0.6	185863	1.31963e+06	2.05954e+08	11371.8	0.852376		0	2021-04-19	0.605748		0.75	0.0154857	0.000496423	0.00388125	0.140845	0.75	86027.2	2.04721e+08	0.394252	1.31963e+06	1.14283	218200	0.01818	0.852634	0.69159	0.000598517	0.00973541	0.00062409
2021-04-20	2.9019e+07	0			0.6	185062	1.31394e+06	2.06035e+08	11316.1	0.851863		0	2021-04-20	0.605985		0.75	0.0153725	0.000496413	0.00386454	0.140845	0.75	85613.1	2.04806e+08	0.394015	1.31394e+06	1.14283	218500	0.01815	0.852119	0.69159	0.000598486	0.00973046	0.000624064
2021-04-21	2.90302e+07	0			0.6	184265	1.30828e+06	2.06115e+08	11260.6	0.851352		0	2021-04-21	0.60622		0.75	0.01526	0.000496403	0.00384788	0.140845	0.75	85199.8	2.04892e+08	0.39378	1.30828e+06	1.14283	218800	0.01812	0.851607	0.69159	0.000598455	0.00972552	0.000624037
2021-04-22	2.90414e+07	0			0.6	183470	1.30264e+06	2.06194e+08	11205.3	0.850844		0	2021-04-22	0.606454		0.75	0.0151482	0.000496392	0.00383129	0.140845	0.75	84787.7	2.04976e+08	0.393546	1.30264e+06	1.14283	219100	0.01809	0.851098	0.69159	0.000598424	0.00972059	0.000624011
2021-04-23	2.90526e+07	0			0.6	182679	1.29702e+06	2.06273e+08	11150.3	0.850338		0	2021-04-23	0.606686		0.75	0.0150373	0.000496382	0.00381476	0.140845	0.75	84376.6	2.05061e+08	0.393314	1.29702e+06	1.14283	219400	0.01806	0.850591	0.69159	0.000598393	0.00971568	0.000623984
2021-04-24	2.90637e+07	0			0.6	181890	1.29142e+06	2.06352e+08	11095.6	0.849835		0	2021-04-24	0.606918		0.75	0.0149271	0.000496371	0.00379829	0.140845	0.75	83966.8	2.05145e+08	0.393082	1.29142e+06	1.14283	219700	0.01803	0.850087	0.69159	0.000598362	0.00971077	0.000623958
2021-04-25	2.90747e+07	0			0.6	181105	1.28585e+06	2.06431e+08	11041.2	0.849335		0	2021-04-25	0.607149		0.75	0.0148177	0.000496361	0.0037819	0.140845	0.75	83558.2	2.05228e+08	0.392851	1.28585e+06	1.14283	220000	0.018	0.849585	0.69159	0.000598331	0.00970589	0.000623932
2021-04-26	2.90857e+07	0			0.6	180323	1.2803e+06	2.06509e+08	10987.1	0.848836		0	2021-04-26	0.607378		0.75	0.0147091	0.000496351	0.00376558	0.140845	0.75	83151.1	2.05311e+08	0.392622	1.2803e+06	1.14283	220300	0.01797	0.849086	0.69159	0.000598299	0.00970101	0.000623905
2021-04-27	2.90966e+07	0			0.6	179545	1.27477e+06	2.06586e+08	10933.2	0.848341		0	2021-04-27	0.607607		0.75	0.0146013	0.00049634	0.00374932	0.140845	0.75	82745.4	2.05394e+08	0.392393	1.27477e+06	1.14283	220600	0.01794	0.848589	0.69159	0.000598268	0.00969615	0.000623879
2021-04-28	2.91075e+07	0			0.6	178771	1.26927e+06	2.06663e+08	10879.7	0.847847		0	2021-04-28	0.607834		0.75	0.0144943	0.00049633	0.00373315	0.140845	0.75	82341.1	2.05477e+08	0.392166	1.26927e+06	1.14283	220900	0.01791	0.848094	0.69159	0.000598237	0.0096913	0.000623852
2021-04-29	2.91184e+07	0			0.6	178000	1.2638e+06	2.0674e+08	10826.4	0.847356		0	2021-04-29	0.60806		0.75	0.014388	0.00049632	0.00371705	0.140845	0.75	81938.4	2.05558e+08	0.39194	1.2638e+06	1.14283	221200	0.01788	0.847602	0.69159	0.000598206	0.00968647	0.000623826
2021-04-30	2.91291e+07	0			0.6	177233	1.25835e+06	2.06817e+08	10773.5	0.846868		0	2021-04-30	0.608285		0.75	0.0142826	0.000496309	0.00370103	0.140845	0.75	81537.3	2.0564e+08	0.391715	1.25835e+06	1.14283	221500	0.01785	0.847112	0.69159	0.000598175	0.00968164	0.000623799
2021-05-01	2.91399e+07	0			0.6	176469	1.25293e+06	2.06893e+08	10720.9	0.846382		0	2021-05-01	0.608509		0.75	0.014178	0.000496299	0.00368509	0.140845	0.75	81137.9	2.05721e+08	0.391491	1.25293e+06	1.14283	221800	0.01782	0.846625	0.69159	0.000598144	0.00967684	0.000623773
2021-05-02	2.91505e+07	0			0.6	175710	1.24754e+06	2.06969e+08	10668.6	0.845898		0	2021-05-02	0.608731		0.75	0.0140742	0.000496289	0.00366924	0.140845	0.75	80740.1	2.05802e+08	0.391269	1.24754e+06	1.14283	222100	0.01779	0.84614	0.69159	0.000598113	0.00967204	0.000623747
2021-05-03	2.91611e+07	0			0.6	174955	1.24218e+06	2.07044e+08	10616.6	0.845417		0	2021-05-03	0.608953		0.75	0.0139712	0.000496278	0.00365347	0.140845	0.75	80344.1	2.05882e+08	0.391047	1.24218e+06	1.14283	222400	0.01776	0.845657	0.69159	0.000598082	0.00966726	0.00062372
2021-05-04	2.91717e+07	0			0.6	174204	1.23685e+06	2.07119e+08	10565	0.844938		0	2021-05-04	0.609174		0.75	0.013869	0.000496268	0.00363778	0.140845	0.75	79950	2.05962e+08	0.390826	1.23685e+06	1.14283	222700	0.01773	0.845177	0.69159	0.000598051	0.00966249	0.000623694
2021-05-05	2.91822e+07	0			0.6	173457	1.23154e+06	2.07194e+08	10513.7	0.844461		0	2021-05-05	0.609393		0.75	0.0137676	0.000496258	0.00362219	0.140845	0.75	79557.7	2.06042e+08	0.390607	1.23154e+06	1.14283	223000	0.0177	0.844699	0.69159	0.00059802	0.00965773	0.000623667
2021-05-06	2.91927e+07	0			0.6	172714	1.22627e+06	2.07268e+08	10462.7	0.843987		0	2021-05-06	0.609612		0.75	0.0136671	0.000496247	0.00360668	0.140845	0.75	79167.3	2.06121e+08	0.390388	1.22627e+06	1.14283	223300	0.01767	0.844224	0.69159	0.000597989	0.00965298	0.000623641
2021-05-07	2.92031e+07	0			0.6	171976	1.22103e+06	2.07342e+08	10412	0.843515		0	2021-05-07	0.609829		0.75	0.0135673	0.000496237	0.00359126	0.140845	0.75	78778.9	2.062e+08	0.390171	1.22103e+06	1.14283	223600	0.01764	0.843751	0.69159	0.000597958	0.00964825	0.000623615
2021-05-08	2.92135e+07	0			0.6	171242	1.21582e+06	2.07415e+08	10361.7	0.843045		0	2021-05-08	0.610046		0.75	0.0134684	0.000496227	0.00357594	0.140845	0.75	78392.5	2.06278e+08	0.389954	1.21582e+06	1.14283	223900	0.01761	0.84328	0.69159	0.000597927	0.00964353	0.000623588
2021-05-09	2.92238e+07	0			0.6	170513	1.21064e+06	2.07489e+08	10311.8	0.842577		0	2021-05-09	0.610261		0.75	0.0133703	0.000496216	0.0035607	0.140845	0.75	78008.1	2.06356e+08	0.389739	1.21064e+06	1.14283	224200	0.01758	0.842811	0.69159	0.000597896	0.00963882	0.000623562
2021-05-10	2.9234e+07	0			0.6	169788	1.20549e+06	2.07562e+08	10262.1	0.842112		0	2021-05-10	0.610475		0.75	0.0132729	0.000496206	0.00354557	0.140845	0.75	77625.8	2.06434e+08	0.389525	1.20549e+06	1.14283	224500	0.01755	0.842345	0.69159	0.000597865	0.00963413	0.000623535
2021-05-11	2.92442e+07	0			0.6	169067	1.20038e+06	2.07634e+08	10212.9	0.841649		0	2021-05-11	0.610688		0.75	0.0131764	0.000496196	0.00353052	0.140845	0.75	77245.7	2.06511e+08	0.389312	1.20038e+06	1.14283	224800	0.01752	0.84188	0.69159	0.000597834	0.00962944	0.000623509
2021-05-12	2.92544e+07	0			0.6	168352	1.1953e+06	2.07706e+08	10164	0.841188		0	2021-05-12	0.610901		0.75	0.0130807	0.000496186	0.00351558	0.140845	0.75	76867.7	2.06588e+08	0.389099	1.1953e+06	1.14283	225100	0.01749	0.841419	0.69159	0.000597803	0.00962477	0.000623483
2021-05-13	2.92645e+07	0			0.6	167641	1.19025e+06	2.07778e+08	10115.4	0.84073		0	2021-05-13	0.611112		0.75	0.0129858	0.000496175	0.00350073	0.140845	0.75	76491.9	2.06664e+08	0.388888	1.19025e+06	1.14283	225400	0.01746	0.840959	0.69159	0.000597772	0.00962012	0.000623456
2021-05-14	2.92746e+07	0			0.6	166934	1.18523e+06	2.0785e+08	10067.2	0.840273		0	2021-05-14	0.611322		0.75	0.0128917	0.000496165	0.00348598	0.140845	0.75	76118.4	2.0674e+08	0.388678	1.18523e+06	1.14283	225700	0.01743	0.840501	0.69159	0.000597741	0.00961547	0.00062343
2021-05-15	2.92846e+07	0			0.6	166233	1.18025e+06	2.07921e+08	10019.3	0.839819		0	2021-05-15	0.611531		0.75	0.0127984	0.000496155	0.00347133	0.140845	0.75	75747.1	2.06816e+08	0.388469	1.18025e+06	1.14283	226000	0.0174	0.840046	0.69159	0.00059771	0.00961084	0.000623404
2021-05-16	2.92946e+07	0			0.6	165536	1.1753e+06	2.07991e+08	9971.81	0.839367		0	2021-05-16	0.61174		0.75	0.012706	0.000496144	0.00345678	0.140845	0.75	75378.1	2.06892e+08	0.38826	1.1753e+06	1.14283	226300	0.01737	0.839593	0.69159	0.000597679	0.00960622	0.000623377
2021-05-17	2.93045e+07	0			0.6	164844	1.17039e+06	2.08062e+08	9924.66	0.838917		0	2021-05-17	0.611947		0.75	0.0126143	0.000496134	0.00344233	0.140845	0.75	75011.4	2.06967e+08	0.388053	1.17039e+06	1.14283	226600	0.01734	0.839142	0.69159	0.000597649	0.00960161	0.000623351
2021-05-18	2.93144e+07	0			0.6	164157	1.16551e+06	2.08132e+08	9877.88	0.838469		0	2021-05-18	0.612153		0.75	0.0125234	0.000496124	0.00342798	0.140845	0.75	74647	2.07041e+08	0.387847	1.16551e+06	1.14283	226900	0.01731	0.838693	0.69159	0.000597618	0.00959701	0.000623325
2021-05-19	2.93242e+07	0			0.6	163475	1.16067e+06	2.08202e+08	9831.45	0.838023		0	2021-05-19	0.612358		0.75	0.0124333	0.000496113	0.00341373	0.140845	0.75	74285	2.07115e+08	0.387642	1.16067e+06	1.14283	227200	0.01728	0.838246	0.69159	0.000597587	0.00959243	0.000623298
2021-05-20	2.9334e+07	0			0.6	162797	1.15586e+06	2.08271e+08	9785.39	0.83758		0	2021-05-20	0.612563		0.75	0.012344	0.000496103	0.00339959	0.140845	0.75	73925.4	2.07189e+08	0.387437	1.15586e+06	1.14283	227500	0.01725	0.837802	0.69159	0.000597556	0.00958785	0.000623272
2021-05-21	2.93437e+07	0			0.6	162125	1.15109e+06	2.08341e+08	9739.69	0.837138		0	2021-05-21	0.612766		0.75	0.0122554	0.000496093	0.00338555	0.140845	0.75	73568.3	2.07263e+08	0.387234	1.15109e+06	1.14283	227800	0.01722	0.837359	0.69159	0.000597525	0.00958329	0.000623246
2021-05-22	2.93534e+07	0			0.6	161458	1.14635e+06	2.08409e+08	9694.36	0.836699		0	2021-05-22	0.612969		0.75	0.0121677	0.000496082	0.00337161	0.140845	0.75	73213.5	2.07336e+08	0.387031	1.14635e+06	1.14283	228100	0.01719	0.836919	0.69159	0.000597494	0.00957874	0.00062322
2021-05-23	2.93631e+07	0			0.6	160795	1.14165e+06	2.08478e+08	9649.38	0.836261		0	2021-05-23	0.61317		0.75	0.0120808	0.000496072	0.00335778	0.140845	0.75	72861.2	2.07409e+08	0.38683	1.14165e+06	1.14283	228400	0.01716	0.83648	0.69159	0.000597463	0.00957421	0.000623193
2021-05-24	2.93727e+07	0			0.6	160138	1.13698e+06	2.08546e+08	9604.77	0.835826		0	2021-05-24	0.613371		0.75	0.0119946	0.000496062	0.00334405	0.140845	0.75	72511.4	2.07482e+08	0.386629	1.13698e+06	1.14283	228700	0.01713	0.836044	0.69159	0.000597432	0.00956968	0.000623167
2021-05-25	2.93822e+07	0			0.6	159485	1.13235e+06	2.08614e+08	9560.52	0.835393		0	2021-05-25	0.61357		0.75	0.0119092	0.000496052	0.00333043	0.140845	0.75	72164.1	2.07554e+08	0.38643	1.13235e+06	1.14283	229000	0.0171	0.835609	0.69159	0.000597402	0.00956517	0.000623141
2021-05-26	2.93918e+07	0			0.6	158838	1.12775e+06	2.08681e+08	9516.64	0.834961		0	2021-05-26	0.613769		0.75	0.0118245	0.000496041	0.00331691	0.140845	0.75	71819.2	2.07626e+08	0.386231	1.12775e+06	1.14283	229300	0.01707	0.835177	0.69159	0.000597371	0.00956066	0.000623114
2021-05-27	2.94012e+07	0			0.6	158196	1.12319e+06	2.08749e+08	9473.12	0.834532		0	2021-05-27	0.613967		0.75	0.0117407	0.000496031	0.0033035	0.140845	0.75	71476.9	2.07697e+08	0.386033	1.12319e+06	1.14283	229600	0.01704	0.834747	0.69159	0.00059734	0.00955617	0.000623088
2021-05-28	2.94107e+07	0			0.6	157559	1.11867e+06	2.08816e+08	9429.96	0.834104		0	2021-05-28	0.614164		0.75	0.0116576	0.000496021	0.0032902	0.140845	0.75	71137.1	2.07768e+08	0.385836	1.11867e+06	1.14283	229900	0.01701	0.834318	0.69159	0.000597309	0.0095517	0.000623062
2021-05-29	2.942e+07	0			0.6	156927	1.11418e+06	2.08882e+08	9387.17	0.833679		0	2021-05-29	0.61436		0.75	0.0115752	0.00049601	0.003277	0.140845	0.75	70799.8	2.07839e+08	0.38564	1.11418e+06	1.14283	230200	0.01698	0.833892	0.69159	0.000597278	0.00954723	0.000623036
2021-05-30	2.94294e+07	0			0.6	156299	1.10973e+06	2.08949e+08	9344.74	0.833255		0	2021-05-30	0.614555		0.75	0.0114936	0.000496	0.0032639	0.140845	0.75	70465.1	2.07909e+08	0.385445	1.10973e+06	1.14283	230500	0.01695	0.833467	0.69159	0.000597247	0.00954277	0.000623009
2021-05-31	2.94387e+07	0			0.6	155677	1.10531e+06	2.09015e+08	9302.67	0.832834		0	2021-05-31	0.614749		0.75	0.0114127	0.00049599	0.00325091	0.140845	0.75	70132.9	2.0798e+08	0.385251	1.10531e+06	1.14283	230800	0.01692	0.833045	0.69159	0.000597217	0.00953833	0.000622983
2021-06-01	2.9448e+07	0			0.6	155061	1.10093e+06	2.09081e+08	9260.96	0.963127		0	2021-06-01	0.614943		1	0.0113326	0.00049598	0.00323803	0.140845	1	69803.3	2.08049e+08	0.385057	1.10093e+06	1.14283	231100	0.01689	0.89798	0.69159	0.000597186	0.0095339	0.000622957
2021-06-02	2.94586e+07	0			0.6	155896	1.10686e+06	2.09156e+08	10667.4	0.962643		0	2021-06-02	0.615165		1	0.0113587	0.000495969	0.00325548	0.140845	1	69476.3	2.08119e+08	0.384835	1.10686e+06	1.14283	231400	0.01686	0.962885	0.69159	0.000597155	0.00952947	0.000622931
2021-06-03	2.94693e+07	0			0.6	156831	1.1135e+06	2.09232e+08	10719.5	0.962086		0	2021-06-03	0.615389		1	0.0113917	0.000495959	0.00327499	0.140845	1	69151.8	2.08188e+08	0.384611	1.1135e+06	1.14283	231700	0.01683	0.962365	0.69159	0.000597124	0.00952506	0.000622904
2021-06-04	2.94801e+07	0			0.6	157868	1.12086e+06	2.09309e+08	10777.5	0.961527		0	2021-06-04	0.615614		1	0.0114318	0.000495949	0.00329666	0.140845	1	68829.9	2.08257e+08	0.384386	1.12086e+06	1.14283	232000	0.0168	0.961807	0.69159	0.000597093	0.00952067	0.000622878
2021-06-05	2.9491e+07	0			0.6	159016	1.12902e+06	2.09386e+08	10842.5	0.960964		0	2021-06-05	0.615841		1	0.0114796	0.000495938	0.00332064	0.140845	1	68510.6	2.08325e+08	0.384159	1.12902e+06	1.14283	232300	0.01677	0.961246	0.69159	0.000597063	0.00951628	0.000622852
2021-06-06	2.95019e+07	0			0.6	160282	1.138e+06	2.09463e+08	10914.9	0.960398		0	2021-06-06	0.616069		1	0.0115353	0.000495928	0.00334706	0.140845	1	68193.9	2.08394e+08	0.383931	1.138e+06	1.14283	232600	0.01674	0.960681	0.69159	0.000597032	0.0095119	0.000622826
2021-06-07	2.95129e+07	0			0.6	161673	1.14787e+06	2.09541e+08	10995.3	0.959828		0	2021-06-07	0.616298		1	0.0115996	0.000495918	0.0033761	0.140845	1	67879.7	2.08461e+08	0.383702	1.14787e+06	1.14283	232900	0.01671	0.960113	0.69159	0.000597001	0.00950754	0.0006228
2021-06-08	2.9524e+07	0			0.6	163196	1.15869e+06	2.0962e+08	11084.1	0.959254		0	2021-06-08	0.61653		1	0.0116729	0.000495908	0.00340792	0.140845	1	67568.1	2.08529e+08	0.38347	1.15869e+06	1.14283	233200	0.01668	0.959541	0.69159	0.00059697	0.00950318	0.000622773
2021-06-09	2.95351e+07	0			0.6	164861	1.17052e+06	2.097e+08	11181.9	0.958676		0	2021-06-09	0.616763		1	0.0117556	0.000495897	0.00344269	0.140845	1	67259.2	2.08596e+08	0.383237	1.17052e+06	1.14283	233500	0.01665	0.958965	0.69159	0.00059694	0.00949884	0.000622747
2021-06-10	2.95464e+07	0			0.6	166677	1.18341e+06	2.0978e+08	11289.2	0.958092		0	2021-06-10	0.616999		1	0.0118485	0.000495887	0.00348062	0.140845	1	66952.7	2.08663e+08	0.383001	1.18341e+06	1.14283	233800	0.01662	0.958384	0.69159	0.000596909	0.00949451	0.000622721
2021-06-11	2.95578e+07	0			0.6	168654	1.19744e+06	2.09861e+08	11406.6	0.957503		0	2021-06-11	0.617237		1	0.011952	0.000495877	0.00352189	0.140845	1	66648.9	2.0873e+08	0.382763	1.19744e+06	1.14283	234100	0.01659	0.957797	0.69159	0.000596878	0.00949019	0.000622695
2021-06-12	2.95694e+07	0			0.6	170802	1.21269e+06	2.09943e+08	11534.8	0.956907		0	2021-06-12	0.617478		1	0.0120669	0.000495866	0.00356674	0.140845	1	66347.6	2.08796e+08	0.382522	1.21269e+06	1.14283	234400	0.01656	0.957205	0.69159	0.000596848	0.00948588	0.000622669
2021-06-13	2.9581e+07	0			0.6	173131	1.22923e+06	2.10025e+08	11674.4	0.956305		0	2021-06-13	0.617722		1	0.0121937	0.000495856	0.00361539	0.140845	1	66048.9	2.08862e+08	0.382278	1.22923e+06	1.14283	234700	0.01653	0.956606	0.69159	0.000596817	0.00948158	0.000622642
2021-06-14	2.95929e+07	0			0.6	175655	1.24715e+06	2.10109e+08	11826.2	0.955695		0	2021-06-14	0.617969		1	0.0123332	0.000495846	0.00366809	0.140845	1	65752.8	2.08928e+08	0.382031	1.24715e+06	1.14283	235000	0.0165	0.956	0.69159	0.000596786	0.00947729	0.000622616
2021-06-15	2.96049e+07	0			0.6	178385	1.26653e+06	2.10195e+08	11990.9	0.955078		0	2021-06-15	0.618219		1	0.0124862	0.000495836	0.00372509	0.140845	1	75738.2	2.09004e+08	0.381781	1.26653e+06	1.14283	235300	0.01647	0.955387	0.69159	0.000596756	0.00947301	0.00062259
2021-06-16	2.9617e+07	0			0.6	179887	1.2772e+06	2.10281e+08	12169.4	0.954452		0	2021-06-16	0.618473		1	0.0125524	0.000495825	0.00375646	0.140845	1	76108.3	2.0908e+08	0.381527	1.2772e+06	1.14283	235600	0.01644	0.954765	0.69159	0.000596725	0.00946874	0.000622564
2021-06-17	2.96293e+07	0			0.6	181431	1.28816e+06	2.10368e+08	12263.8	0.953817		0	2021-06-17	0.618729		1	0.012621	0.000495815	0.00378871	0.140845	1	76520	2.09156e+08	0.381271	1.28816e+06	1.14283	235900	0.01641	0.954134	0.69159	0.000596694	0.00946449	0.000622538
2021-06-18	2.96417e+07	0			0.6	183015	1.2994e+06	2.10456e+08	12360.9	0.953176		0	2021-06-18	0.618988		1	0.0126917	0.000495805	0.00382177	0.140845	1	76981.6	2.09233e+08	0.381012	1.2994e+06	1.14283	236200	0.01638	0.953497	0.69159	0.000596664	0.00946024	0.000622512
2021-06-19	2.96541e+07	0			0.6	184632	1.31089e+06	2.10544e+08	12460.4	0.952531		0	2021-06-19	0.619248		1	0.0127642	0.000495795	0.00385556	0.140845	1	77496	2.09311e+08	0.380752	1.31089e+06	1.14283	236500	0.01635	0.952854	0.69159	0.000596633	0.00945601	0.000622486
2021-06-20	2.96667e+07	0			0.6	186279	1.32258e+06	2.10633e+08	12562	0.951881		0	2021-06-20	0.61951		1	0.0128382	0.000495784	0.00388995	0.140845	1	78066.8	2.09389e+08	0.38049	1.32258e+06	1.14283	236800	0.01632	0.952206	0.69159	0.000596602	0.00945178	0.000622459
2021-06-21	2.96793e+07	0			0.6	187950	1.33444e+06	2.10723e+08	12665.4	0.951225		0	2021-06-21	0.619775		1	0.0129131	0.000495774	0.00392483	0.140845	1	78697.3	2.09468e+08	0.380225	1.33444e+06	1.14283	237100	0.01629	0.951553	0.69159	0.000596572	0.00944757	0.000622433
2021-06-22	2.96921e+07	0			0.6	189636	1.34641e+06	2.10814e+08	12770.2	0.950564		0	2021-06-22	0.620041		1	0.0129885	0.000495764	0.00396004	0.140845	1	79391.5	2.09547e+08	0.379959	1.34641e+06	1.14283	237400	0.01626	0.950894	0.69159	0.000596541	0.00944337	0.000622407
2021-06-23	2.9705e+07	0			0.6	191329	1.35844e+06	2.10905e+08	12875.8	0.949897		0	2021-06-23	0.62031		1	0.0130639	0.000495754	0.00399541	0.140845	1	80153.2	2.09627e+08	0.37969	1.35844e+06	1.14283	237700	0.01623	0.95023	0.69159	0.00059651	0.00943918	0.000622381
2021-06-24	2.9718e+07	0			0.6	193022	1.37046e+06	2.10998e+08	12981.7	0.949225		0	2021-06-24	0.620581		1	0.0131385	0.000495743	0.00403075	0.140845	1	80986.8	2.09708e+08	0.379419	1.37046e+06	1.14283	238000	0.0162	0.949561	0.69159	0.00059648	0.00943499	0.000622355
2021-06-25	2.97311e+07	0			0.6	194703	1.38239e+06	2.11091e+08	13087.2	0.948547		0	2021-06-25	0.620854		1	0.0132117	0.000495733	0.00406585	0.140845	1	81896.8	2.0979e+08	0.379146	1.38239e+06	1.14283	238300	0.01617	0.948886	0.69159	0.000596449	0.00943082	0.000622329
2021-06-26	2.97443e+07	0			0.6	196360	1.39415e+06	2.11184e+08	13191.8	0.947864		0	2021-06-26	0.62113		1	0.0132827	0.000495723	0.00410045	0.140845	1	82888.1	2.09873e+08	0.37887	1.39415e+06	1.14283	238600	0.01614	0.948205	0.69159	0.000596419	0.00942666	0.000622303
2021-06-27	2.97575e+07	0			0.6	197980	1.40566e+06	2.11279e+08	13294.4	0.947175		0	2021-06-27	0.621408		1	0.0133506	0.000495713	0.00413428	0.140845	1	83965.8	2.09957e+08	0.378592	1.40566e+06	1.14283	238900	0.01611	0.947519	0.69159	0.000596388	0.00942251	0.000622277
2021-06-28	2.97709e+07	0			0.6	199548	1.41679e+06	2.11374e+08	13394.4	0.946481		0	2021-06-28	0.621687		1	0.0134144	0.000495702	0.00416703	0.140845	1	85135.3	2.10042e+08	0.378313	1.41679e+06	1.14283	239200	0.01608	0.946828	0.69159	0.000596357	0.00941837	0.000622251
2021-06-29	2.97844e+07	0			0.6	201048	1.42744e+06	2.11469e+08	13490.6	0.945782		0	2021-06-29	0.621969		1	0.0134731	0.000495692	0.00419835	0.140845	1	86402.6	2.10128e+08	0.378031	1.42744e+06	1.14283	239500	0.01605	0.946131	0.69159	0.000596327	0.00941424	0.000622225
2021-06-30	2.9798e+07	0			0.6	202460	1.43747e+06	2.11566e+08	13581.9	0.945078		0	2021-06-30	0.622253		1	0.0135255	0.000495682	0.00422784	0.140845	1	87073	2.10215e+08	0.377747	1.43747e+06	1.14283	239800	0.01602	0.94543	0.69159	0.000596296	0.00941012	0.000622199
2021-07-01	2.98117e+07	0			0.6	203863	1.44743e+06	2.11663e+08	13667.2	0.944368		0	2021-07-01	0.622538		1	0.0135767	0.000495672	0.00425715	0.140845	1	87762.1	2.10303e+08	0.377462	1.44743e+06	1.14283	240100	0.01599	0.944723	0.69159	0.000596266	0.00940601	0.000622172
2021-07-02	2.98254e+07	0			0.6	205254	1.4573e+06	2.11761e+08	13751.6	0.943655		0	2021-07-02	0.622825		1	0.0136267	0.000495661	0.00428619	0.140845	1	88468.6	2.10392e+08	0.377175	1.4573e+06	1.14283	240400	0.01596	0.944012	0.69159	0.000596235	0.00940191	0.000622146
2021-07-03	2.98393e+07	0			0.6	206629	1.46706e+06	2.11859e+08	13834.9	0.942937		0	2021-07-03	0.623114		1	0.0136751	0.000495651	0.00431489	0.140845	1	89190.3	2.10481e+08	0.376886	1.46706e+06	1.14283	240700	0.01593	0.943296	0.69159	0.000596205	0.00939782	0.00062212
2021-07-04	2.98532e+07	0			0.6	207984	1.47668e+06	2.11958e+08	13917	0.942215		0	2021-07-04	0.623405		1	0.0137217	0.000495641	0.00434319	0.140845	1	89924.5	2.10571e+08	0.376595	1.47668e+06	1.14283	241000	0.0159	0.942576	0.69159	0.000596174	0.00939374	0.000622094
2021-07-05	2.98672e+07	0			0.6	209316	1.48614e+06	2.12057e+08	13997.5	0.941488		0	2021-07-05	0.623697		1	0.0137664	0.000495631	0.00437101	0.140845	1	90668.2	2.10662e+08	0.376303	1.48614e+06	1.14283	241300	0.01587	0.941851	0.69159	0.000596144	0.00938967	0.000622068
2021-07-06	2.98813e+07	0			0.6	210622	1.49542e+06	2.12157e+08	14076.3	0.940757		0	2021-07-06	0.623991		1	0.013809	0.00049562	0.00439828	0.140845	1	91417.9	2.10753e+08	0.376009	1.49542e+06	1.14283	241600	0.01584	0.941123	0.69159	0.000596113	0.00938561	0.000622042
2021-07-07	2.98954e+07	0			0.6	211899	1.50449e+06	2.12257e+08	14153.2	0.940023		0	2021-07-07	0.624287		1	0.0138492	0.00049561	0.00442496	0.140845	1	92169.8	2.10845e+08	0.375713	1.50449e+06	1.14283	241900	0.01581	0.94039	0.69159	0.000596083	0.00938156	0.000622016
2021-07-08	2.99096e+07	0			0.6	213146	1.51333e+06	2.12358e+08	14227.9	0.939284		0	2021-07-08	0.624584		1	0.013887	0.0004956	0.00445098	0.140845	1	92919.3	2.10938e+08	0.375416	1.51333e+06	1.14283	242200	0.01578	0.939653	0.69159	0.000596052	0.00937752	0.00062199
2021-07-09	2.99239e+07	0			0.6	214359	1.52195e+06	2.1246e+08	14300.3	0.938541		0	2021-07-09	0.624882		1	0.0139223	0.00049559	0.00447631	0.140845	1	93661.5	2.11032e+08	0.375118	1.52195e+06	1.14283	242500	0.01575	0.938912	0.69159	0.000596022	0.00937349	0.000621964
2021-07-10	2.99383e+07	0			0.6	215537	1.53031e+06	2.12562e+08	14370.3	0.937794		0	2021-07-10	0.625182		1	0.0139549	0.00049558	0.00450092	0.140845	1	94390.5	2.11126e+08	0.374818	1.53031e+06	1.14283	242800	0.01572	0.938168	0.69159	0.000595991	0.00936947	0.000621938
2021-07-11	2.99527e+07	0			0.6	216681	1.53843e+06	2.12665e+08	14437.8	0.937044		0	2021-07-11	0.625484		1	0.0139849	0.000495569	0.0045248	0.140845	1	95100.1	2.11221e+08	0.374516	1.53843e+06	1.14283	243100	0.01569	0.937419	0.69159	0.000595961	0.00936546	0.000621912
2021-07-12	2.99672e+07	0			0.6	217789	1.5463e+06	2.12767e+08	14502.8	0.93629		0	2021-07-12	0.625787		1	0.0140122	0.000495559	0.00454795	0.140845	1	95783.2	2.11317e+08	0.374213	1.5463e+06	1.14283	243400	0.01566	0.936667	0.69159	0.00059593	0.00936146	0.000621886
2021-07-13	2.99818e+07	0			0.6	218864	1.55393e+06	2.12871e+08	14565.3	0.935533		0	2021-07-13	0.626091		1	0.0140371	0.000495549	0.00457039	0.140845	1	96431.7	2.11413e+08	0.373909	1.55393e+06	1.14283	243700	0.01563	0.935912	0.69159	0.0005959	0.00935746	0.00062186
2021-07-14	2.99964e+07	0			0.6	219907	1.56134e+06	2.12975e+08	14625.3	0.934773		0	2021-07-14	0.626396		1	0.0140596	0.000495539	0.00459218	0.140845	1	97037	2.1151e+08	0.373604	1.56134e+06	1.14283	244000	0.0156	0.935153	0.69159	0.000595869	0.00935348	0.000621834
2021-07-15	3.00111e+07	0			0.6	220923	1.56855e+06	2.13079e+08	14683.1	0.934009		0	2021-07-15	0.626703		1	0.0140801	0.000495528	0.00461339	0.140845	1	97636.3	2.11608e+08	0.373297	1.56855e+06	1.14283	244300	0.01557	0.934391	0.69159	0.000595839	0.00934951	0.000621808
2021-07-16	3.00259e+07	0			0.6	221910	1.57556e+06	2.13184e+08	14738.9	0.933243		0	2021-07-16	0.627011		1	0.0140985	0.000495518	0.00463401	0.140845	1	98228.1	2.11706e+08	0.372989	1.57556e+06	1.14283	244600	0.01554	0.933626	0.69159	0.000595808	0.00934555	0.000621782
2021-07-17	3.00407e+07	0			0.6	222868	1.58236e+06	2.13289e+08	14792.6	0.932473		0	2021-07-17	0.62732		1	0.0141147	0.000495508	0.00465401	0.140845	1	98810.7	2.11805e+08	0.37268	1.58236e+06	1.14283	244900	0.01551	0.932858	0.69159	0.000595778	0.0093416	0.000621756
2021-07-18	3.00555e+07	0			0.6	223795	1.58895e+06	2.13394e+08	14844.2	0.931701		0	2021-07-18	0.62763		1	0.0141287	0.000495498	0.00467337	0.140845	1	99382.4	2.11904e+08	0.37237	1.58895e+06	1.14283	245200	0.01548	0.932087	0.69159	0.000595748	0.00933765	0.00062173
2021-07-19	3.00704e+07	0			0.6	224691	1.59531e+06	2.135e+08	14893.6	0.930926		0	2021-07-19	0.627941		1	0.0141404	0.000495488	0.00469208	0.140845	1	99941.8	2.12004e+08	0.372059	1.59531e+06	1.14283	245500	0.01545	0.931314	0.69159	0.000595717	0.00933372	0.000621704
2021-07-20	3.00853e+07	0			0.6	225556	1.60145e+06	2.13606e+08	14940.8	0.930149		0	2021-07-20	0.628253		1	0.01415	0.000495477	0.00471013	0.140845	1	100487	2.12105e+08	0.371747	1.60145e+06	1.14283	245800	0.01542	0.930537	0.69159	0.000595687	0.0093298	0.000621678
2021-07-21	3.01003e+07	0			0.6	226388	1.60736e+06	2.13712e+08	14985.7	0.929369		0	2021-07-21	0.628565		1	0.0141573	0.000495467	0.00472752	0.140845	1	101018	2.12206e+08	0.371435	1.60736e+06	1.14283	246100	0.01539	0.929759	0.69159	0.000595656	0.00932588	0.000621652
2021-07-22	3.01153e+07	0			0.6	227189	1.61304e+06	2.13819e+08	15028.4	0.928586		0	2021-07-22	0.628879		1	0.0141624	0.000495457	0.00474424	0.140845	1	101532	2.12307e+08	0.371121	1.61304e+06	1.14283	246400	0.01536	0.928977	0.69159	0.000595626	0.00932198	0.000621626
2021-07-23	3.01304e+07	0			0.6	227957	1.6185e+06	2.13926e+08	15068.9	0.927802		0	2021-07-23	0.629194		1	0.0141653	0.000495447	0.00476029	0.140845	1	102029	2.12409e+08	0.370806	1.6185e+06	1.14283	246700	0.01533	0.928194	0.69159	0.000595596	0.00931808	0.0006216
2021-07-24	3.01455e+07	0			0.6	228694	1.62373e+06	2.14033e+08	15107.1	0.927015		0	2021-07-24	0.629509		1	0.0141661	0.000495437	0.00477567	0.140845	1	102509	2.12512e+08	0.370491	1.62373e+06	1.14283	247000	0.0153	0.927408	0.69159	0.000595565	0.00931419	0.000621574
2021-07-25	3.01607e+07	0			0.6	229399	1.62874e+06	2.14141e+08	15143.1	0.926226		0	2021-07-25	0.629826		1	0.0141647	0.000495426	0.0047904	0.140845	1	102970	2.12615e+08	0.370174	1.62874e+06	1.14283	247300	0.01527	0.926621	0.69159	0.000595535	0.00931032	0.000621549
2021-07-26	3.01758e+07	0			0.6	230073	1.63352e+06	2.14248e+08	15176.8	0.925436		0	2021-07-26	0.630143		1	0.0141612	0.000495416	0.00480447	0.140845	1	103413	2.12718e+08	0.369857	1.63352e+06	1.14283	247600	0.01524	0.925831	0.69159	0.000595505	0.00930645	0.000621523
2021-07-27	3.01911e+07	0			0.6	230717	1.63809e+06	2.14356e+08	15208.4	0.924643		0	2021-07-27	0.63046		1	0.0141557	0.000495406	0.00481791	0.140845	1	103840	2.12822e+08	0.36954	1.63809e+06	1.14283	247900	0.01521	0.92504	0.69159	0.000595474	0.00930259	0.000621497
2021-07-28	3.02063e+07	0			0.6	231329	1.64244e+06	2.14465e+08	15237.9	0.923849		0	2021-07-28	0.630778		1	0.0141482	0.000495396	0.0048307	0.140845	1	104250	2.12926e+08	0.369222	1.64244e+06	1.14283	248200	0.01518	0.924246	0.69159	0.000595444	0.00929874	0.000621471
2021-07-29	3.02216e+07	0			0.6	231911	1.64657e+06	2.14573e+08	15265.2	0.923054		0	2021-07-29	0.631097		1	0.0141387	0.000495386	0.00484285	0.140845	1	104646	2.13031e+08	0.368903	1.64657e+06	1.14283	248500	0.01515	0.923452	0.69159	0.000595414	0.0092949	0.000621445
2021-07-30	3.02368e+07	0			0.6	232463	1.65049e+06	2.14682e+08	15290.5	0.922257		0	2021-07-30	0.631416		1	0.0141272	0.000495375	0.00485437	0.140845	1	105027	2.13136e+08	0.368584	1.65049e+06	1.14283	248800	0.01512	0.922656	0.69159	0.000595383	0.00929107	0.000621419
2021-07-31	3.02522e+07	0			0.6	232984	1.65419e+06	2.1479e+08	15313.6	0.921459		0	2021-07-31	0.631736		1	0.0141137	0.000495365	0.00486525	0.140845	1	105394	2.13242e+08	0.368264	1.65419e+06	1.14283	249100	0.01509	0.921858	0.69159	0.000595353	0.00928724	0.000621393
2021-08-01	3.02675e+07	0			0.6	233474	1.65767e+06	2.14899e+08	15334.7	0.920659		0	2021-08-01	0.632056		1	0.0140983	0.000495355	0.0048755	0.140845	1	105744	2.13347e+08	0.367944	1.65767e+06	1.14283	249400	0.01506	0.921059	0.69159	0.000595323	0.00928343	0.000621367
2021-08-02	3.02828e+07	0			0.6	233934	1.66093e+06	2.15008e+08	15353.6	0.919859		0	2021-08-02	0.632377		1	0.014081	0.000495345	0.0048851	0.140845	1	106080	2.13453e+08	0.367623	1.66093e+06	1.14283	249700	0.01503	0.920259	0.69159	0.000595292	0.00927963	0.000621341
2021-08-03	3.02982e+07	0			0.6	234364	1.66399e+06	2.15117e+08	15370.5	0.919057		0	2021-08-03	0.632698		1	0.0140619	0.000495335	0.00489408	0.140845	1	106399	2.1356e+08	0.367302	1.66399e+06	1.14283	250000	0.015	0.919458	0.69159	0.000595262	0.00927583	0.000621315
2021-08-04	3.03136e+07	0			0.6	234764	1.66682e+06	2.15227e+08	15385.3	0.918255		0	2021-08-04	0.633019		1	0.0140408	0.000495324	0.00490242	0.140845	1	106702	2.13666e+08	0.366981	1.66682e+06	1.14283	250300	0.01497	0.918656	0.69159	0.000595232	0.00927205	0.00062129
2021-08-05	3.0329e+07	0			0.6	235133	1.66945e+06	2.15336e+08	15398.1	0.917452		0	2021-08-05	0.633341		1	0.0140179	0.000495314	0.00491014	0.140845	1	106989	2.13773e+08	0.366659	1.66945e+06	1.14283	250600	0.01494	0.917853	0.69159	0.000595201	0.00926827	0.000621264
2021-08-06	3.03444e+07	0			0.6	235473	1.67186e+06	2.15445e+08	15408.8	0.916648		0	2021-08-06	0.633663		1	0.0139933	0.000495304	0.00491724	0.140845	1	107260	2.13881e+08	0.366337	1.67186e+06	1.14283	250900	0.01491	0.91705	0.69159	0.000595171	0.0092645	0.000621238
2021-08-07	3.03598e+07	0			0.6	235784	1.67406e+06	2.15555e+08	15417.6	0.915843		0	2021-08-07	0.633985		1	0.0139668	0.000495294	0.00492372	0.140845	1	107516	2.13988e+08	0.366015	1.67406e+06	1.14283	251200	0.01488	0.916246	0.69159	0.000595141	0.00926074	0.000621212
2021-08-08	3.03753e+07	0			0.6	236065	1.67606e+06	2.15664e+08	15424.4	0.915038		0	2021-08-08	0.634307		1	0.0139386	0.000495284	0.00492959	0.140845	1	107756	2.14096e+08	0.365693	1.67606e+06	1.14283	251500	0.01485	0.915441	0.69159	0.000595111	0.00925699	0.000621186
2021-08-09	3.03907e+07	0			0.6	236317	1.67785e+06	2.15774e+08	15429.2	0.914233		0	2021-08-09	0.634629		1	0.0139088	0.000495273	0.00493486	0.140845	1	107980	2.14204e+08	0.365371	1.67785e+06	1.14283	251800	0.01482	0.914636	0.69159	0.00059508	0.00925325	0.00062116
2021-08-10	3.04061e+07	0			0.6	236541	1.67944e+06	2.15883e+08	15432.1	0.913428		0	2021-08-10	0.634951		1	0.0138772	0.000495263	0.00493953	0.140845	1	108189	2.14312e+08	0.365049	1.67944e+06	1.14283	252100	0.01479	0.91383	0.69159	0.00059505	0.00924951	0.000621134
2021-08-11	3.04215e+07	0			0.6	236736	1.68083e+06	2.15993e+08	15433.1	0.912622		0	2021-08-11	0.635273		1	0.013844	0.000495253	0.00494361	0.140845	1	108383	2.14421e+08	0.364727	1.68083e+06	1.14283	252400	0.01476	0.913025	0.69159	0.00059502	0.00924579	0.000621109
2021-08-12	3.0437e+07	0			0.6	236903	1.68201e+06	2.16103e+08	15432.2	0.911816		0	2021-08-12	0.635596		1	0.0138092	0.000495243	0.0049471	0.140845	1	108562	2.14529e+08	0.364404	1.68201e+06	1.14283	252700	0.01473	0.912219	0.69159	0.00059499	0.00924207	0.000621083
2021-08-13	3.04524e+07	0			0.6	237042	1.683e+06	2.16212e+08	15429.4	0.911011		0	2021-08-13	0.635918		1	0.0137728	0.000495233	0.00495	0.140845	1	108727	2.14638e+08	0.364082	1.683e+06	1.14283	253000	0.0147	0.911414	0.69159	0.000594959	0.00923837	0.000621057
2021-08-14	3.04678e+07	0			0.6	237153	1.68379e+06	2.16322e+08	15424.9	0.910205		0	2021-08-14	0.63624		1	0.0137349	0.000495223	0.00495232	0.140845	1	108876	2.14747e+08	0.36376	1.68379e+06	1.14283	253300	0.01467	0.910608	0.69159	0.000594929	0.00923467	0.000621031
2021-08-15	3.04833e+07	0			0.6	237237	1.68438e+06	2.16431e+08	15418.4	0.9094		0	2021-08-15	0.636562		1	0.0136954	0.000495212	0.00495407	0.140845	1	109011	2.14856e+08	0.363438	1.68438e+06	1.14283	253600	0.01464	0.909803	0.69159	0.000594899	0.00923098	0.000621005
2021-08-16	3.04987e+07	0			0.6	237294	1.68479e+06	2.1654e+08	15410.2	0.908595		0	2021-08-16	0.636884		1	0.0136544	0.000495202	0.00495525	0.140845	1	109130	2.14965e+08	0.363116	1.68479e+06	1.14283	253900	0.01461	0.908997	0.69159	0.000594869	0.0092273	0.00062098
2021-08-17	3.05141e+07	0			0.6	237324	1.685e+06	2.1665e+08	15400.3	0.90779		0	2021-08-17	0.637205		1	0.013612	0.000495192	0.00495588	0.140845	1	109236	2.15074e+08	0.362795	1.685e+06	1.14283	254200	0.01458	0.908193	0.69159	0.000594839	0.00922363	0.000620954
2021-08-18	3.05295e+07	0			0.6	237327	1.68502e+06	2.16759e+08	15388.6	0.906986		0	2021-08-18	0.637527		1	0.0135682	0.000495182	0.00495594	0.140845	1	109326	2.15183e+08	0.362473	1.68502e+06	1.14283	254500	0.01455	0.907388	0.69159	0.000594809	0.00921996	0.000620928
2021-08-19	3.05448e+07	0			0.6	237304	1.68486e+06	2.16868e+08	15375.2	0.906183		0	2021-08-19	0.637848		1	0.013523	0.000495172	0.00495547	0.140845	1	109403	2.15293e+08	0.362152	1.68486e+06	1.14283	254800	0.01452	0.906585	0.69159	0.000594778	0.00921631	0.000620902
2021-08-20	3.05602e+07	0			0.6	237255	1.68451e+06	2.16977e+08	15360.1	0.90538		0	2021-08-20	0.638169		1	0.0134764	0.000495162	0.00495445	0.140845	1	109465	2.15402e+08	0.361831	1.68451e+06	1.14283	255100	0.01449	0.905782	0.69159	0.000594748	0.00921266	0.000620876
2021-08-21	3.05755e+07	0			0.6	237181	1.68399e+06	2.17086e+08	15343.3	0.904579		0	2021-08-21	0.638489		1	0.0134285	0.000495151	0.0049529	0.140845	1	109513	2.15512e+08	0.361511	1.68399e+06	1.14283	255400	0.01446	0.904979	0.69159	0.000594718	0.00920902	0.000620851
2021-08-22	3.05909e+07	0			0.6	237082	1.68328e+06	2.17195e+08	15324.9	0.903778		0	2021-08-22	0.638809		1	0.0133793	0.000495141	0.00495082	0.140845	1	109547	2.15621e+08	0.361191	1.68328e+06	1.14283	255700	0.01443	0.904178	0.69159	0.000594688	0.00920539	0.000620825
2021-08-23	3.06062e+07	0			0.6	236957	1.6824e+06	2.17304e+08	15304.9	0.902977		0	2021-08-23	0.639129		1	0.0133288	0.000495131	0.00494823	0.140845	1	109568	2.15731e+08	0.360871	1.6824e+06	1.14283	256000	0.0144	0.903378	0.69159	0.000594658	0.00920177	0.000620799
2021-08-24	3.06214e+07	0			0.6	236809	1.68134e+06	2.17412e+08	15283.4	0.902178		0	2021-08-24	0.639448		1	0.0132772	0.000495121	0.00494512	0.140845	1	109575	2.1584e+08	0.360552	1.68134e+06	1.14283	256300	0.01437	0.902578	0.69159	0.000594628	0.00919815	0.000620773
2021-08-25	3.06367e+07	0			0.6	236636	1.68011e+06	2.17521e+08	15260.3	0.901381		0	2021-08-25	0.639766		1	0.0132243	0.000495111	0.00494151	0.140845	1	109569	2.1595e+08	0.360234	1.68011e+06	1.14283	256600	0.01434	0.90178	0.69159	0.000594598	0.00919455	0.000620748
2021-08-26	3.06519e+07	0			0.6	236439	1.67872e+06	2.17629e+08	15235.6	0.900584		0	2021-08-26	0.640085		1	0.0131703	0.000495101	0.00493741	0.140845	1	109549	2.1606e+08	0.359915	1.67872e+06	1.14283	256900	0.01431	0.900982	0.69159	0.000594567	0.00919095	0.000620722
2021-08-27	3.06671e+07	0			0.6	236219	1.67716e+06	2.17737e+08	15209.5	0.899789		0	2021-08-27	0.640402		1	0.0131151	0.00049509	0.00493281	0.140845	1	109516	2.16169e+08	0.359598	1.67716e+06	1.14283	257200	0.01428	0.900186	0.69159	0.000594537	0.00918736	0.000620696
2021-08-28	3.06823e+07	0			0.6	235976	1.67543e+06	2.17845e+08	15182	0.898995		0	2021-08-28	0.640719		1	0.0130589	0.00049508	0.00492774	0.140845	1	109471	2.16279e+08	0.359281	1.67543e+06	1.14283	257500	0.01425	0.899392	0.69159	0.000594507	0.00918378	0.00062067
2021-08-29	3.06975e+07	0			0.6	235711	1.67355e+06	2.17952e+08	15153	0.898202		0	2021-08-29	0.641036		1	0.0130016	0.00049507	0.0049222	0.140845	1	109413	2.16388e+08	0.358964	1.67355e+06	1.14283	257800	0.01422	0.898598	0.69159	0.000594477	0.00918021	0.000620645
2021-08-30	3.07126e+07	0			0.6	235423	1.67151e+06	2.18059e+08	15122.6	0.897411		0	2021-08-30	0.641351		1	0.0129433	0.00049506	0.00491619	0.140845	1	109342	2.16497e+08	0.358649	1.67151e+06	1.14283	258100	0.01419	0.897806	0.69159	0.000594447	0.00917664	0.000620619
2021-08-31	3.07277e+07	0			0.6	235114	1.66931e+06	2.18167e+08	15090.8	0.896621		0	2021-08-31	0.641667		1	0.0128839	0.00049505	0.00490973	0.140845	1	109259	2.16607e+08	0.358333	1.66931e+06	1.14283	258400	0.01416	0.897016	0.69159	0.000594417	0.00917309	0.000620593
2021-09-01	3.07428e+07	0			0.6	234783	1.66696e+06	2.18274e+08	15057.7	0.895834		0	2021-09-01	0.641981		1	0.0128237	0.00049504	0.00490282	0.140845	1	109164	2.16716e+08	0.358019	1.66696e+06	1.14283	258700	0.01413	0.896227	0.69159	0.000594387	0.00916954	0.000620567
2021-09-02	3.07578e+07	0			0.6	234431	1.66446e+06	2.1838e+08	15023.3	0.895047		0	2021-09-02	0.642295		1	0.0127625	0.00049503	0.00489547	0.140845	1	109056	2.16825e+08	0.357705	1.66446e+06	1.14283	259000	0.0141	0.89544	0.69159	0.000594357	0.009166	0.000620542
2021-09-03	3.07728e+07	0			0.6	234059	1.66182e+06	2.18487e+08	14987.6	0.894263		0	2021-09-03	0.642608		1	0.0127004	0.000495019	0.00488769	0.140845	1	108937	2.16934e+08	0.357392	1.66182e+06	1.14283	259300	0.01407	0.894655	0.69159	0.000594327	0.00916247	0.000620516
2021-09-04	3.07877e+07	0			0.6	233666	1.65903e+06	2.18593e+08	14950.7	0.893481		0	2021-09-04	0.64292		1	0.0126374	0.000495009	0.0048795	0.140845	1	108807	2.17043e+08	0.35708	1.65903e+06	1.14283	259600	0.01404	0.893872	0.69159	0.000594297	0.00915895	0.00062049
2021-09-05	3.08026e+07	0			0.6	233254	1.6561e+06	2.18699e+08	14912.6	0.8927		0	2021-09-05	0.643231		1	0.0125736	0.000494999	0.00487089	0.140845	1	108665	2.17151e+08	0.356769	1.6561e+06	1.14283	259900	0.01401	0.89309	0.69159	0.000594267	0.00915543	0.000620465
2021-09-06	3.08175e+07	0			0.6	232822	1.65304e+06	2.18804e+08	14873.3	0.891922		0	2021-09-06	0.643542		1	0.012509	0.000494989	0.00486187	0.140845	1	108512	2.1726e+08	0.356458	1.65304e+06	1.14283	260200	0.01398	0.892311	0.69159	0.000594237	0.00915192	0.000620439
2021-09-07	3.08323e+07	0			0.6	232371	1.64984e+06	2.1891e+08	14832.8	0.891145		0	2021-09-07	0.643852		1	0.0124437	0.000494979	0.00485246	0.140845	1	108348	2.17368e+08	0.356148	1.64984e+06	1.14283	260500	0.01395	0.891533	0.69159	0.000594207	0.00914842	0.000620413
2021-09-08	3.08471e+07	0			0.6	231902	1.64651e+06	2.19015e+08	14791.2	0.890371		0	2021-09-08	0.644161		1	0.0123776	0.000494969	0.00484267	0.140845	1	108173	2.17476e+08	0.355839	1.64651e+06	1.14283	260800	0.01392	0.890758	0.69159	0.000594177	0.00914493	0.000620388
2021-09-09	3.08619e+07	0			0.6	231415	1.64305e+06	2.19119e+08	14748.5	0.889599		0	2021-09-09	0.644469		1	0.0123108	0.000494959	0.00483249	0.140845	1	107988	2.17584e+08	0.355531	1.64305e+06	1.14283	261100	0.01389	0.889985	0.69159	0.000594147	0.00914145	0.000620362
2021-09-10	3.08766e+07	0			0.6	230910	1.63946e+06	2.19224e+08	14704.8	0.888829		0	2021-09-10	0.644776		1	0.0122434	0.000494949	0.00482195	0.140845	1	107792	2.17692e+08	0.355224	1.63946e+06	1.14283	261400	0.01386	0.889214	0.69159	0.000594117	0.00913797	0.000620336
2021-09-11	3.08912e+07	0			0.6	230389	1.63576e+06	2.19328e+08	14660	0.888061		0	2021-09-11	0.645082		1	0.0121753	0.000494938	0.00481105	0.140845	1	107586	2.178e+08	0.354918	1.63576e+06	1.14283	261700	0.01383	0.888445	0.69159	0.000594087	0.0091345	0.000620311
2021-09-12	3.09059e+07	0			0.6	229850	1.63193e+06	2.19432e+08	14614.2	0.887296		0	2021-09-12	0.645387		1	0.0121066	0.000494928	0.0047998	0.140845	1	107370	2.17907e+08	0.354613	1.63193e+06	1.14283	262000	0.0138	0.887678	0.69159	0.000594057	0.00913104	0.000620285
2021-09-13	3.09204e+07	0			0.6	229295	1.62799e+06	2.19535e+08	14567.5	0.886533		0	2021-09-13	0.645691		1	0.0120373	0.000494918	0.00478821	0.140845	1	107145	2.18014e+08	0.354309	1.62799e+06	1.14283	262300	0.01377	0.886914	0.69159	0.000594027	0.00912759	0.000620259
2021-09-14	3.09349e+07	0			0.6	228724	1.62394e+06	2.19638e+08	14519.8	0.885772		0	2021-09-14	0.645994		1	0.0119675	0.000494908	0.00477629	0.140845	1	106910	2.18121e+08	0.354006	1.62394e+06	1.14283	262600	0.01374	0.886152	0.69159	0.000593997	0.00912414	0.000620234
2021-09-15	3.09494e+07	0			0.6	228137	1.61977e+06	2.19741e+08	14471.2	0.885014		0	2021-09-15	0.646297		1	0.0118971	0.000494898	0.00476404	0.140845	1	106666	2.18228e+08	0.353703	1.61977e+06	1.14283	262900	0.01371	0.885393	0.69159	0.000593967	0.00912071	0.000620208
2021-09-16	3.09638e+07	0			0.6	227536	1.6155e+06	2.19843e+08	14421.8	0.884259		0	2021-09-16	0.646598		1	0.0118263	0.000494888	0.00475148	0.140845	1	106412	2.18334e+08	0.353402	1.6155e+06	1.14283	263200	0.01368	0.884636	0.69159	0.000593937	0.00911728	0.000620182
2021-09-17	3.09782e+07	0			0.6	226919	1.61113e+06	2.19945e+08	14371.5	0.883506		0	2021-09-17	0.646898		1	0.011755	0.000494878	0.00473861	0.140845	1	106150	2.1844e+08	0.353102	1.61113e+06	1.14283	263500	0.01365	0.883882	0.69159	0.000593907	0.00911385	0.000620157
2021-09-18	3.09925e+07	0			0.6	226289	1.60665e+06	2.20047e+08	14320.3	0.882756		0	2021-09-18	0.647197		1	0.0116833	0.000494868	0.00472545	0.140845	1	105879	2.18546e+08	0.352803	1.60665e+06	1.14283	263800	0.01362	0.883131	0.69159	0.000593877	0.00911044	0.000620131
2021-09-19	3.10068e+07	0			0.6	225645	1.60208e+06	2.20148e+08	14268.4	0.882008		0	2021-09-19	0.647495		1	0.0116112	0.000494857	0.004712	0.140845	1	105600	2.18652e+08	0.352505	1.60208e+06	1.14283	264100	0.01359	0.882382	0.69159	0.000593847	0.00910703	0.000620105
2021-09-20	3.1021e+07	0			0.6	224987	1.59741e+06	2.20249e+08	14215.8	0.881263		0	2021-09-20	0.647792		1	0.0115387	0.000494847	0.00469827	0.140845	1	105313	2.18757e+08	0.352208	1.59741e+06	1.14283	264400	0.01356	0.881635	0.69159	0.000593817	0.00910363	0.00062008
2021-09-21	3.10352e+07	0			0.6	224317	1.59265e+06	2.2035e+08	14162.4	0.880521		0	2021-09-21	0.648087		1	0.0114658	0.000494837	0.00468427	0.140845	1	105017	2.18862e+08	0.351913	1.59265e+06	1.14283	264700	0.01353	0.880892	0.69159	0.000593787	0.00910024	0.000620054
2021-09-22	3.10493e+07	0			0.6	223634	1.5878e+06	2.2045e+08	14108.3	0.879782		0	2021-09-22	0.648382		1	0.0113927	0.000494827	0.00467001	0.140845	1	104714	2.18967e+08	0.351618	1.5878e+06	1.14283	265000	0.0135	0.880151	0.69159	0.000593757	0.00909686	0.000620029
2021-09-23	3.10633e+07	0			0.6	222939	1.58287e+06	2.2055e+08	14053.5	0.879045		0	2021-09-23	0.648675		1	0.0113192	0.000494817	0.00465549	0.140845	1	104404	2.19071e+08	0.351325	1.58287e+06	1.14283	265300	0.01347	0.879413	0.69159	0.000593727	0.00909348	0.000620003
2021-09-24	3.10773e+07	0			0.6	222232	1.57785e+06	2.20649e+08	13998.1	0.878311		0	2021-09-24	0.648968		1	0.0112455	0.000494807	0.00464074	0.140845	1	104086	2.19175e+08	0.351032	1.57785e+06	1.14283	265600	0.01344	0.878678	0.69159	0.000593698	0.00909011	0.000619977
2021-09-25	3.10913e+07	0			0.6	221514	1.57275e+06	2.20748e+08	13942.1	0.877581		0	2021-09-25	0.649259		1	0.0111715	0.000494797	0.00462574	0.140845	1	103761	2.19279e+08	0.350741	1.57275e+06	1.14283	265900	0.01341	0.877946	0.69159	0.000593668	0.00908675	0.000619952
2021-09-26	3.11052e+07	0			0.6	220786	1.56758e+06	2.20847e+08	13885.5	0.876853		0	2021-09-26	0.649549		1	0.0110973	0.000494787	0.00461053	0.140845	1	103429	2.19382e+08	0.350451	1.56758e+06	1.14283	266200	0.01338	0.877217	0.69159	0.000593638	0.0090834	0.000619926
2021-09-27	3.1119e+07	0			0.6	220047	1.56233e+06	2.20945e+08	13828.3	0.876128		0	2021-09-27	0.649838		1	0.011023	0.000494777	0.00459509	0.140845	1	103091	2.19486e+08	0.350162	1.56233e+06	1.14283	266500	0.01335	0.87649	0.69159	0.000593608	0.00908005	0.000619901
2021-09-28	3.11328e+07	0			0.6	219297	1.55701e+06	2.21043e+08	13770.6	0.875406		0	2021-09-28	0.650125		1	0.0109484	0.000494766	0.00457945	0.140845	1	102746	2.19588e+08	0.349875	1.55701e+06	1.14283	266800	0.01332	0.875767	0.69159	0.000593578	0.00907671	0.000619875
2021-09-29	3.11465e+07	0			0.6	218539	1.55162e+06	2.2114e+08	13712.4	0.874687		0	2021-09-29	0.650412		1	0.0108738	0.000494756	0.0045636	0.140845	1	102394	2.19691e+08	0.349588	1.55162e+06	1.14283	267100	0.01329	0.875046	0.69159	0.000593548	0.00907338	0.00061985
2021-09-30	3.11601e+07	0			0.6	217771	1.54617e+06	2.21237e+08	13653.8	0.873971		0	2021-09-30	0.650697		1	0.0107989	0.000494746	0.00454756	0.140845	1	102037	2.19793e+08	0.349303	1.54617e+06	1.14283	267400	0.01326	0.874329	0.69159	0.000593518	0.00907006	0.000619824
2021-10-01	3.11737e+07	0			0.6	216994	1.54066e+06	2.21333e+08	13594.7	0.873258		0	2021-10-01	0.650981		1	0.0107241	0.000494736	0.00453134	0.140845	1	101674	2.19894e+08	0.349019	1.54066e+06	1.14283	267700	0.01323	0.873615	0.69159	0.000593489	0.00906674	0.000619799
2021-10-02	3.11873e+07	0			0.6	216209	1.53508e+06	2.2143e+08	13535.1	0.872549		0	2021-10-02	0.651263		1	0.0106491	0.000494726	0.00451495	0.140845	1	101306	2.19996e+08	0.348737	1.53508e+06	1.14283	268000	0.0132	0.872903	0.69159	0.000593459	0.00906343	0.000619773
2021-10-03	3.12007e+07	0			0.6	215415	1.52945e+06	2.21525e+08	13475.2	0.871842		0	2021-10-03	0.651545		1	0.0105741	0.000494716	0.00449838	0.140845	1	100932	2.20097e+08	0.348455	1.52945e+06	1.14283	268300	0.01317	0.872195	0.69159	0.000593429	0.00906013	0.000619747
2021-10-04	3.12141e+07	0			0.6	214615	1.52376e+06	2.2162e+08	13414.9	0.871138		0	2021-10-04	0.651825		1	0.010499	0.000494706	0.00448166	0.140845	1	100553	2.20197e+08	0.348175	1.52376e+06	1.14283	268600	0.01314	0.87149	0.69159	0.000593399	0.00905683	0.000619722
2021-10-05	3.12275e+07	0			0.6	213806	1.51803e+06	2.21715e+08	13354.2	0.870438		0	2021-10-05	0.652104		1	0.010424	0.000494696	0.00446478	0.140845	1	100169	2.20297e+08	0.347896	1.51803e+06	1.14283	268900	0.01311	0.870788	0.69159	0.000593369	0.00905354	0.000619696
2021-10-06	3.12408e+07	0			0.6	212991	1.51224e+06	2.2181e+08	13293.2	0.869741		0	2021-10-06	0.652381		1	0.0103489	0.000494686	0.00444776	0.140845	1	99779.9	2.20397e+08	0.347619	1.51224e+06	1.14283	269200	0.01308	0.87009	0.69159	0.00059334	0.00905026	0.000619671
2021-10-07	3.1254e+07	0			0.6	212170	1.50641e+06	2.21904e+08	13232	0.869047		0	2021-10-07	0.652658		1	0.0102739	0.000494676	0.0044306	0.140845	1	99386.5	2.20497e+08	0.347342	1.50641e+06	1.14283	269500	0.01305	0.869394	0.69159	0.00059331	0.00904699	0.000619645
2021-10-08	3.12672e+07	0			0.6	211342	1.50053e+06	2.21997e+08	13170.4	0.868356		0	2021-10-08	0.652933		1	0.0101989	0.000494665	0.00441332	0.140845	1	98988.8	2.20596e+08	0.347067	1.50053e+06	1.14283	269800	0.01302	0.868702	0.69159	0.00059328	0.00904372	0.00061962
2021-10-09	3.12803e+07	0			0.6	210509	1.49461e+06	2.2209e+08	13108.6	0.867669		0	2021-10-09	0.653206		1	0.0101241	0.000494655	0.00439592	0.140845	1	98586.9	2.20694e+08	0.346794	1.49461e+06	1.14283	270100	0.01299	0.868012	0.69159	0.00059325	0.00904046	0.000619594
2021-10-10	3.12933e+07	0			0.6	209670	1.48865e+06	2.22183e+08	13046.6	0.866984		0	2021-10-10	0.653479		1	0.0100493	0.000494645	0.0043784	0.140845	1	98181.1	2.20792e+08	0.346521	1.48865e+06	1.14283	270400	0.01296	0.867326	0.69159	0.00059322	0.00903721	0.000619569
2021-10-11	3.13063e+07	0			0.6	208826	1.48266e+06	2.22275e+08	12984.3	0.866303		0	2021-10-11	0.65375		1	0.00997457	0.000494635	0.00436077	0.140845	1	97771.5	2.2089e+08	0.34625	1.48266e+06	1.14283	270700	0.01293	0.866644	0.69159	0.000593191	0.00903397	0.000619543
2021-10-12	3.13193e+07	0			0.6	207977	1.47664e+06	2.22367e+08	12921.9	0.865625		0	2021-10-12	0.65402		1	0.00990001	0.000494625	0.00434305	0.140845	1	97358.4	2.20987e+08	0.34598	1.47664e+06	1.14283	271000	0.0129	0.865964	0.69159	0.000593161	0.00903073	0.000619518
2021-10-13	3.13321e+07	0			0.6	207124	1.47058e+06	2.22458e+08	12859.3	0.864951		0	2021-10-13	0.654288		1	0.00982559	0.000494615	0.00432523	0.140845	1	96941.8	2.21084e+08	0.345712	1.47058e+06	1.14283	271300	0.01287	0.865288	0.69159	0.000593131	0.0090275	0.000619492
2021-10-14	3.13449e+07	0			0.6	206267	1.46449e+06	2.22549e+08	12796.6	0.864279		0	2021-10-14	0.654555		1	0.00975133	0.000494605	0.00430733	0.140845	1	96522.1	2.21181e+08	0.345445	1.46449e+06	1.14283	271600	0.01284	0.864615	0.69159	0.000593101	0.00902427	0.000619467
2021-10-15	3.13576e+07	0			0.6	205406	1.45838e+06	2.22639e+08	12733.7	0.863611		0	2021-10-15	0.654821		1	0.00967725	0.000494595	0.00428935	0.140845	1	96099.4	2.21277e+08	0.345179	1.45838e+06	1.14283	271900	0.01281	0.863945	0.69159	0.000593072	0.00902106	0.000619441
2021-10-16	3.13703e+07	0			0.6	204541	1.45224e+06	2.22729e+08	12670.8	0.862947		0	2021-10-16	0.655086		1	0.00960337	0.000494585	0.0042713	0.140845	1	95673.8	2.21373e+08	0.344914	1.45224e+06	1.14283	272200	0.01278	0.863279	0.69159	0.000593042	0.00901785	0.000619416
2021-10-17	3.13829e+07	0			0.6	203674	1.44608e+06	2.22819e+08	12607.7	0.862285		0	2021-10-17	0.655349		1	0.00952969	0.000494575	0.00425319	0.140845	1	95245.6	2.21468e+08	0.344651	1.44608e+06	1.14283	272500	0.01275	0.862616	0.69159	0.000593012	0.00901464	0.00061939
2021-10-18	3.13955e+07	0			0.6	202803	1.4399e+06	2.22908e+08	12544.6	0.861627		0	2021-10-18	0.655611		1	0.00945623	0.000494565	0.00423501	0.140845	1	94814.9	2.21563e+08	0.344389	1.4399e+06	1.14283	272800	0.01272	0.861956	0.69159	0.000592983	0.00901145	0.000619365
2021-10-19	3.14079e+07	0			0.6	201931	1.43371e+06	2.22996e+08	12481.5	0.860972		0	2021-10-19	0.655872		1	0.00938302	0.000494555	0.00421679	0.140845	1	94381.9	2.21657e+08	0.344128	1.43371e+06	1.14283	273100	0.01269	0.861299	0.69159	0.000592953	0.00900826	0.00061934
2021-10-20	3.14204e+07	0			0.6	201056	1.4275e+06	2.23085e+08	12418.3	0.86032		0	2021-10-20	0.656131		1	0.00931005	0.000494544	0.00419852	0.140845	1	93946.9	2.21751e+08	0.343869	1.4275e+06	1.14283	273400	0.01266	0.860646	0.69159	0.000592923	0.00900507	0.000619314
2021-10-21	3.14327e+07	0			0.6	200179	1.42127e+06	2.23172e+08	12355.2	0.859672		0	2021-10-21	0.656389		1	0.00923735	0.000494534	0.00418021	0.140845	1	93509.8	2.21845e+08	0.343611	1.42127e+06	1.14283	273700	0.01263	0.859996	0.69159	0.000592894	0.0090019	0.000619289
2021-10-22	3.1445e+07	0			0.6	199301	1.41504e+06	2.2326e+08	12292	0.859027		0	2021-10-22	0.656646		1	0.00916492	0.000494524	0.00416187	0.140845	1	93071	2.21938e+08	0.343354	1.41504e+06	1.14283	274000	0.0126	0.85935	0.69159	0.000592864	0.00899873	0.000619263
2021-10-23	3.14572e+07	0			0.6	198421	1.40879e+06	2.23346e+08	12228.9	0.858385		0	2021-10-23	0.656901		1	0.00909279	0.000494514	0.0041435	0.140845	1	92630.5	2.2203e+08	0.343099	1.40879e+06	1.14283	274300	0.01257	0.858706	0.69159	0.000592834	0.00899557	0.000619238
2021-10-24	3.14694e+07	0			0.6	197540	1.40254e+06	2.23433e+08	12165.8	0.857747		0	2021-10-24	0.657155		1	0.00902096	0.000494504	0.00412511	0.140845	1	92188.6	2.22122e+08	0.342845	1.40254e+06	1.14283	274600	0.01254	0.858066	0.69159	0.000592805	0.00899241	0.000619212
2021-10-25	3.14815e+07	0			0.6	196659	1.39628e+06	2.23519e+08	12102.8	0.857112		0	2021-10-25	0.657408		1	0.00894944	0.000494494	0.0041067	0.140845	1	91745.3	2.22214e+08	0.342592	1.39628e+06	1.14283	274900	0.01251	0.857429	0.69159	0.000592775	0.00898926	0.000619187
2021-10-26	3.14936e+07	0			0.6	195777	1.39002e+06	2.23604e+08	12039.9	0.85648		0	2021-10-26	0.657659		1	0.00887825	0.000494484	0.00408828	0.140845	1	91301	2.22306e+08	0.342341	1.39002e+06	1.14283	275200	0.01248	0.856796	0.69159	0.000592745	0.00898612	0.000619162
2021-10-27	3.15055e+07	0			0.6	194895	1.38375e+06	2.23689e+08	11977.1	0.855851		0	2021-10-27	0.65791		1	0.0088074	0.000494474	0.00406986	0.140845	1	90855.6	2.22396e+08	0.34209	1.38375e+06	1.14283	275500	0.01245	0.856166	0.69159	0.000592716	0.00898299	0.000619136
2021-10-28	3.15174e+07	0			0.6	194012	1.37749e+06	2.23774e+08	11914.3	0.855226		0	2021-10-28	0.658158		1	0.00873689	0.000494464	0.00405144	0.140845	1	90409.3	2.22487e+08	0.341842	1.37749e+06	1.14283	275800	0.01242	0.855539	0.69159	0.000592686	0.00897986	0.000619111
2021-10-29	3.15293e+07	0			0.6	193130	1.37123e+06	2.23858e+08	11851.8	0.854604		0	2021-10-29	0.658406		1	0.00866674	0.000494454	0.00403302	0.140845	1	89962.4	2.22577e+08	0.341594	1.37123e+06	1.14283	276100	0.01239	0.854915	0.69159	0.000592656	0.00897674	0.000619085
2021-10-30	3.15411e+07	0			0.6	192249	1.36497e+06	2.23942e+08	11789.3	0.853985		0	2021-10-30	0.658652		1	0.00859695	0.000494444	0.00401461	0.140845	1	89514.8	2.22666e+08	0.341348	1.36497e+06	1.14283	276400	0.01236	0.854295	0.69159	0.000592627	0.00897362	0.00061906
2021-10-31	3.15528e+07	0			0.6	191368	1.35871e+06	2.24025e+08	11727	0.85337		0	2021-10-31	0.658897		1	0.00852754	0.000494434	0.00399622	0.140845	1	89066.9	2.22755e+08	0.341103	1.35871e+06	1.14283	276700	0.01233	0.853678	0.69159	0.000592597	0.00897051	0.000619035
2021-11-01	3.15645e+07	0			0.6	190489	1.35247e+06	2.24108e+08	11664.9	0.852758		0	2021-11-01	0.659141		1	0.00845852	0.000494424	0.00397785	0.140845	1	88618.6	2.22844e+08	0.340859	1.35247e+06	1.14283	277000	0.0123	0.853064	0.69159	0.000592568	0.00896741	0.000619009
2021-11-02	3.15761e+07	0			0.6	189610	1.34623e+06	2.2419e+08	11602.9	0.852149		0	2021-11-02	0.659383		1	0.00838988	0.000494414	0.0039595	0.140845	1	88170.2	2.22932e+08	0.340617	1.34623e+06	1.14283	277300	0.01227	0.852453	0.69159	0.000592538	0.00896432	0.000618984
2021-11-03	3.15876e+07	0			0.6	188733	1.34e+06	2.24272e+08	11541.1	0.851543		0	2021-11-03	0.659624		1	0.00832164	0.000494404	0.00394118	0.140845	1	87721.7	2.2302e+08	0.340376	1.34e+06	1.14283	277600	0.01224	0.851846	0.69159	0.000592508	0.00896123	0.000618958
2021-11-04	3.15991e+07	0			0.6	187857	1.33379e+06	2.24354e+08	11479.6	0.85094		0	2021-11-04	0.659864		1	0.00825382	0.000494394	0.0039229	0.140845	1	87273.4	2.23107e+08	0.340136	1.33379e+06	1.14283	277900	0.01221	0.851242	0.69159	0.000592479	0.00895815	0.000618933
2021-11-05	3.16105e+07	0			0.6	186983	1.32758e+06	2.24435e+08	11418.2	0.850341		0	2021-11-05	0.660102		1	0.0081864	0.000494384	0.00390465	0.140845	1	86825.2	2.23194e+08	0.339898	1.32758e+06	1.14283	278200	0.01218	0.850641	0.69159	0.000592449	0.00895507	0.000618908
2021-11-06	3.16219e+07	0			0.6	186112	1.32139e+06	2.24515e+08	11357.1	0.849745		0	2021-11-06	0.660339		1	0.00811941	0.000494374	0.00388645	0.140845	1	86377.4	2.2328e+08	0.339661	1.32139e+06	1.14283	278500	0.01215	0.850043	0.69159	0.00059242	0.008952	0.000618882
2021-11-07	3.16332e+07	0			0.6	185242	1.31522e+06	2.24596e+08	11296.2	0.849152		0	2021-11-07	0.660575		1	0.00805284	0.000494363	0.00386829	0.140845	1	85930.1	2.23366e+08	0.339425	1.31522e+06	1.14283	278800	0.01212	0.849449	0.69159	0.00059239	0.00894894	0.000618857
2021-11-08	3.16444e+07	0			0.6	184375	1.30906e+06	2.24675e+08	11235.6	0.848562		0	2021-11-08	0.66081		1	0.00798671	0.000494353	0.00385018	0.140845	1	85483.3	2.23452e+08	0.33919	1.30906e+06	1.14283	279100	0.01209	0.848857	0.69159	0.000592361	0.00894589	0.000618832
2021-11-09	3.16556e+07	0			0.6	183510	1.30292e+06	2.24755e+08	11175.2	0.847976		0	2021-11-09	0.661043		1	0.00792101	0.000494343	0.00383212	0.140845	1	85037.2	2.23537e+08	0.338957	1.30292e+06	1.14283	279400	0.01206	0.848269	0.69159	0.000592331	0.00894284	0.000618806
2021-11-10	3.16667e+07	0			0.6	182648	1.2968e+06	2.24834e+08	11115.1	0.847392		0	2021-11-10	0.661275		1	0.00785576	0.000494333	0.00381412	0.140845	1	84591.9	2.23621e+08	0.338725	1.2968e+06	1.14283	279700	0.01203	0.847684	0.69159	0.000592302	0.00893979	0.000618781
2021-11-11	3.16778e+07	0			0.6	181789	1.2907e+06	2.24912e+08	11055.3	0.846812		0	2021-11-11	0.661506		1	0.00779096	0.000494323	0.00379618	0.140845	1	84147.4	2.23705e+08	0.338494	1.2907e+06	1.14283	280000	0.012	0.847102	0.69159	0.000592272	0.00893676	0.000618756
2021-11-12	3.16887e+07	0			0.6	180933	1.28463e+06	2.2499e+08	10995.8	0.846235		0	2021-11-12	0.661736		1	0.00772661	0.000494313	0.00377831	0.140845	1	83704	2.23789e+08	0.338264	1.28463e+06	1.14283	280300	0.01197	0.846524	0.69159	0.000592242	0.00893373	0.00061873
2021-11-13	3.16997e+07	0			0.6	180080	1.27857e+06	2.25068e+08	10936.6	0.845661		0	2021-11-13	0.661964		1	0.00766272	0.000494303	0.0037605	0.140845	1	83261.6	2.23872e+08	0.338036	1.27857e+06	1.14283	280600	0.01194	0.845948	0.69159	0.000592213	0.0089307	0.000618705
2021-11-14	3.17106e+07	0			0.6	179231	1.27254e+06	2.25145e+08	10877.6	0.84509		0	2021-11-14	0.662191		1	0.0075993	0.000494293	0.00374277	0.140845	1	82820.5	2.23955e+08	0.337809	1.27254e+06	1.14283	280900	0.01191	0.845375	0.69159	0.000592183	0.00892769	0.00061868
2021-11-15	3.17214e+07	0			0.6	178385	1.26654e+06	2.25222e+08	10819	0.844522		0	2021-11-15	0.662417		1	0.00753633	0.000494283	0.0037251	0.140845	1	82380.6	2.24038e+08	0.337583	1.26654e+06	1.14283	281200	0.01188	0.844806	0.69159	0.000592154	0.00892467	0.000618654
2021-11-16	3.17321e+07	0			0.6	177543	1.26056e+06	2.25298e+08	10760.7	0.843957		0	2021-11-16	0.662642		1	0.00747384	0.000494273	0.00370752	0.140845	1	81942	2.2412e+08	0.337358	1.26056e+06	1.14283	281500	0.01185	0.84424	0.69159	0.000592124	0.00892167	0.000618629
2021-11-17	3.17428e+07	0			0.6	176705	1.2546e+06	2.25374e+08	10702.8	0.843396		0	2021-11-17	0.662865		1	0.00741182	0.000494263	0.00369001	0.140845	1	81505	2.24201e+08	0.337135	1.2546e+06	1.14283	281800	0.01182	0.843676	0.69159	0.000592095	0.00891867	0.000618604
2021-11-18	3.17535e+07	0			0.6	175870	1.24868e+06	2.2545e+08	10645.1	0.842837		0	2021-11-18	0.663088		1	0.00735027	0.000494253	0.00367259	0.140845	1	81069.4	2.24282e+08	0.336912	1.24868e+06	1.14283	282100	0.01179	0.843116	0.69159	0.000592066	0.00891568	0.000618579
2021-11-19	3.17641e+07	0			0.6	175040	1.24278e+06	2.25525e+08	10587.9	0.842281		0	2021-11-19	0.663309		1	0.0072892	0.000494243	0.00365525	0.140845	1	80635.5	2.24363e+08	0.336691	1.24278e+06	1.14283	282400	0.01176	0.842559	0.69159	0.000592036	0.00891269	0.000618553
2021-11-20	3.17746e+07	0			0.6	174214	1.23692e+06	2.256e+08	10530.9	0.841728		0	2021-11-20	0.663529		1	0.00722861	0.000494233	0.00363799	0.140845	1	80203.3	2.24443e+08	0.336471	1.23692e+06	1.14283	282700	0.01173	0.842005	0.69159	0.000592007	0.00890971	0.000618528
2021-11-21	3.17851e+07	0			0.6	173392	1.23108e+06	2.25674e+08	10474.3	0.841178		0	2021-11-21	0.663747		1	0.0071685	0.000494223	0.00362083	0.140845	1	79772.8	2.24523e+08	0.336253	1.23108e+06	1.14283	283000	0.0117	0.841453	0.69159	0.000591977	0.00890674	0.000618503
2021-11-22	3.17955e+07	0			0.6	172574	1.22528e+06	2.25748e+08	10418.1	0.840632		0	2021-11-22	0.663965		1	0.00710887	0.000494213	0.00360376	0.140845	1	79344.2	2.24602e+08	0.336035	1.22528e+06	1.14283	283300	0.01167	0.840905	0.69159	0.000591948	0.00890377	0.000618477
2021-11-23	3.18059e+07	0			0.6	171761	1.21951e+06	2.25822e+08	10362.2	0.840088		0	2021-11-23	0.664181		1	0.00704973	0.000494203	0.00358678	0.140845	1	78917.6	2.24681e+08	0.335819	1.21951e+06	1.14283	283600	0.01164	0.84036	0.69159	0.000591918	0.00890081	0.000618452
2021-11-24	3.18162e+07	0			0.6	170953	1.21377e+06	2.25895e+08	10306.8	0.839547		0	2021-11-24	0.664397		1	0.00699107	0.000494193	0.0035699	0.140845	1	78492.9	2.2476e+08	0.335603	1.21377e+06	1.14283	283900	0.01161	0.839817	0.69159	0.000591889	0.00889786	0.000618427
2021-11-25	3.18264e+07	0			0.6	170149	1.20806e+06	2.25968e+08	10251.6	0.839009		0	2021-11-25	0.664611		1	0.00693289	0.000494183	0.00355312	0.140845	1	78070.2	2.24838e+08	0.335389	1.20806e+06	1.14283	284200	0.01158	0.839278	0.69159	0.000591859	0.00889491	0.000618402
2021-11-26	3.18366e+07	0			0.6	169350	1.20239e+06	2.2604e+08	10196.9	0.838474		0	2021-11-26	0.664824		1	0.00687521	0.000494173	0.00353643	0.140845	1	77649.6	2.24915e+08	0.335176	1.20239e+06	1.14283	284500	0.01155	0.838741	0.69159	0.00059183	0.00889196	0.000618376
2021-11-27	3.18468e+07	0			0.6	168556	1.19675e+06	2.26112e+08	10142.6	0.837941		0	2021-11-27	0.665035		1	0.00681801	0.000494163	0.00351985	0.140845	1	77231.3	2.24992e+08	0.334965	1.19675e+06	1.14283	284800	0.01152	0.838207	0.69159	0.000591801	0.00888903	0.000618351
2021-11-28	3.18569e+07	0			0.6	167767	1.19115e+06	2.26184e+08	10088.6	0.837412		0	2021-11-28	0.665246		1	0.0067613	0.000494153	0.00350338	0.140845	1	76815.1	2.25069e+08	0.334754	1.19115e+06	1.14283	285100	0.01149	0.837676	0.69159	0.000591771	0.0088861	0.000618326
2021-11-29	3.18669e+07	0			0.6	166983	1.18558e+06	2.26255e+08	10035	0.836885		0	2021-11-29	0.665456		1	0.00670508	0.000494143	0.003487	0.140845	1	76401.2	2.25146e+08	0.334544	1.18558e+06	1.14283	285400	0.01146	0.837148	0.69159	0.000591742	0.00888317	0.000618301
2021-11-30	3.18769e+07	0			0.6	166204	1.18005e+06	2.26326e+08	9981.85	0.836361		0	2021-11-30	0.665664		1	0.00664934	0.000494133	0.00347074	0.140845	1	75989.7	2.25222e+08	0.334336	1.18005e+06	1.14283	285700	0.01143	0.836623	0.69159	0.000591713	0.00888025	0.000618276
2021-12-01	3.18868e+07	0			0.6	165431	1.17456e+06	2.26396e+08	9929.07	0.83584		0	2021-12-01	0.665871		1	0.00659409	0.000494123	0.00345458	0.140845	1	75580.5	2.25297e+08	0.334129	1.17456e+06	1.14283	286000	0.0114	0.836101	0.69159	0.000591683	0.00887734	0.00061825
2021-12-02	3.18967e+07	0			0.6	164662	1.1691e+06	2.26466e+08	9876.69	0.835322		0	2021-12-02	0.666078		1	0.00653933	0.000494113	0.00343854	0.140845	1	75173.8	2.25372e+08	0.333922	1.1691e+06	1.14283	286300	0.01137	0.835581	0.69159	0.000591654	0.00887443	0.000618225
2021-12-03	3.19065e+07	0			0.6	163899	1.16368e+06	2.26536e+08	9824.71	0.834806		0	2021-12-03	0.666283		1	0.00648505	0.000494103	0.0034226	0.140845	1	74769.5	2.25447e+08	0.333717	1.16368e+06	1.14283	286600	0.01134	0.835064	0.69159	0.000591624	0.00887153	0.0006182
2021-12-04	3.19163e+07	0			0.6	163141	1.1583e+06	2.26606e+08	9773.14	0.834293		0	2021-12-04	0.666487		1	0.00643126	0.000494093	0.00340677	0.140845	1	74367.8	2.25522e+08	0.333513	1.1583e+06	1.14283	286900	0.01131	0.83455	0.69159	0.000591595	0.00886864	0.000618175
2021-12-05	3.1926e+07	0			0.6	162389	1.15296e+06	2.26675e+08	9721.98	0.833783		0	2021-12-05	0.66669		1	0.00637795	0.000494083	0.00339106	0.140845	1	73968.6	2.25596e+08	0.33331	1.15296e+06	1.14283	287200	0.01128	0.834038	0.69159	0.000591566	0.00886575	0.00061815
2021-12-06	3.19357e+07	0			0.6	161642	1.14766e+06	2.26743e+08	9671.23	0.833275		0	2021-12-06	0.666892		1	0.00632513	0.000494073	0.00337547	0.140845	1	73572	2.25669e+08	0.333108	1.14766e+06	1.14283	287500	0.01125	0.833529	0.69159	0.000591536	0.00886287	0.000618124
2021-12-07	3.19453e+07	0			0.6	160901	1.1424e+06	2.26812e+08	9620.88	0.83277		0	2021-12-07	0.667093		1	0.00627278	0.000494063	0.00335999	0.140845	1	73178	2.25742e+08	0.332907	1.1424e+06	1.14283	287800	0.01122	0.833023	0.69159	0.000591507	0.00885999	0.000618099
2021-12-08	3.19549e+07	0			0.6	160165	1.13717e+06	2.26879e+08	9570.96	0.832268		0	2021-12-08	0.667293		1	0.00622092	0.000494053	0.00334462	0.140845	1	72786.7	2.25815e+08	0.332707	1.13717e+06	1.14283	288100	0.01119	0.832519	0.69159	0.000591478	0.00885712	0.000618074
2021-12-09	3.19644e+07	0			0.6	159435	1.13199e+06	2.26947e+08	9521.44	0.831769		0	2021-12-09	0.667491		1	0.00616953	0.000494043	0.00332937	0.140845	1	72398.1	2.25887e+08	0.332509	1.13199e+06	1.14283	288400	0.01116	0.832018	0.69159	0.000591448	0.00885425	0.000618049
2021-12-10	3.19738e+07	0			0.6	158710	1.12684e+06	2.27014e+08	9472.34	0.831271		0	2021-12-10	0.667689		1	0.00611862	0.000494033	0.00331424	0.140845	1	72012.2	2.2596e+08	0.332311	1.12684e+06	1.14283	288700	0.01113	0.83152	0.69159	0.000591419	0.0088514	0.000618024
2021-12-11	3.19833e+07	0			0.6	157991	1.12174e+06	2.27081e+08	9423.66	0.830777		0	2021-12-11	0.667886		1	0.00606818	0.000494023	0.00329923	0.140845	1	71629	2.26031e+08	0.332114	1.12174e+06	1.14283	289000	0.0111	0.831024	0.69159	0.00059139	0.00884854	0.000617998
2021-12-12	3.19926e+07	0			0.6	157278	1.11667e+06	2.27148e+08	9375.39	0.830285		0	2021-12-12	0.668082		1	0.00601821	0.000494013	0.00328434	0.140845	1	71248.7	2.26102e+08	0.331918	1.11667e+06	1.14283	289300	0.01107	0.830531	0.69159	0.000591361	0.00884569	0.000617973
2021-12-13	3.2002e+07	0			0.6	156571	1.11165e+06	2.27214e+08	9327.54	0.829796		0	2021-12-13	0.668277		1	0.00596871	0.000494003	0.00326956	0.140845	1	70871.1	2.26173e+08	0.331723	1.11165e+06	1.14283	289600	0.01104	0.83004	0.69159	0.000591331	0.00884285	0.000617948
2021-12-14	3.20113e+07	0			0.6	155869	1.10667e+06	2.2728e+08	9280.11	0.829309		0	2021-12-14	0.66847		1	0.00591968	0.000493993	0.00325491	0.140845	1	70496.4	2.26244e+08	0.33153	1.10667e+06	1.14283	289900	0.01101	0.829552	0.69159	0.000591302	0.00884002	0.000617923
2021-12-15	3.20205e+07	0			0.6	155173	1.10173e+06	2.27345e+08	9233.1	0.828824		0	2021-12-15	0.668663		1	0.00587112	0.000493983	0.00324038	0.140845	1	70124.5	2.26314e+08	0.331337	1.10173e+06	1.14283	290200	0.01098	0.829066	0.69159	0.000591273	0.00883719	0.000617898
2021-12-16	3.20297e+07	0			0.6	154483	1.09683e+06	2.27411e+08	9186.5	0.828342		0	2021-12-16	0.668855		1	0.00582301	0.000493973	0.00322596	0.140845	1	69755.4	2.26384e+08	0.331145	1.09683e+06	1.14283	290500	0.01095	0.828583	0.69159	0.000591243	0.00883436	0.000617873
2021-12-17	3.20388e+07	0			0.6	153798	1.09197e+06	2.27476e+08	9140.32	0.827863		0	2021-12-17	0.669046		1	0.00577537	0.000493963	0.00321167	0.140845	1	69389.3	2.26453e+08	0.330954	1.09197e+06	1.14283	290800	0.01092	0.828102	0.69159	0.000591214	0.00883154	0.000617848
2021-12-18	3.20479e+07	0			0.6	153120	1.08715e+06	2.2754e+08	9094.56	0.827385		0	2021-12-18	0.669236		1	0.00572818	0.000493953	0.0031975	0.140845	1	69026	2.26522e+08	0.330764	1.08715e+06	1.14283	291100	0.01089	0.827624	0.69159	0.000591185	0.00882873	0.000617823
2021-12-19	3.2057e+07	0			0.6	152447	1.08237e+06	2.27604e+08	9049.22	0.826911		0	2021-12-19	0.669425		1	0.00568145	0.000493943	0.00318345	0.140845	1	68665.7	2.26591e+08	0.330575	1.08237e+06	1.14283	291400	0.01086	0.827148	0.69159	0.000591156	0.00882592	0.000617797
2021-12-20	3.2066e+07	0			0.6	151780	1.07764e+06	2.27668e+08	9004.29	0.826438		0	2021-12-20	0.669613		1	0.00563517	0.000493933	0.00316952	0.140845	1	68308.3	2.26659e+08	0.330387	1.07764e+06	1.14283	291700	0.01083	0.826674	0.69159	0.000591127	0.00882312	0.000617772
2021-12-21	3.20749e+07	0			0.6	151119	1.07294e+06	2.27732e+08	8959.77	0.825968		0	2021-12-21	0.6698		1	0.00558933	0.000493923	0.00315572	0.140845	1	67953.8	2.26727e+08	0.3302	1.07294e+06	1.14283	292000	0.0108	0.826203	0.69159	0.000591097	0.00882033	0.000617747
2021-12-22	3.20838e+07	0			0.6	150464	1.06829e+06	2.27795e+08	8915.67	0.8255		0	2021-12-22	0.669986		1	0.00554394	0.000493913	0.00314203	0.140845	1	67602.2	2.26795e+08	0.330014	1.06829e+06	1.14283	292300	0.01077	0.825734	0.69159	0.000591068	0.00881754	0.000617722
2021-12-23	3.20927e+07	0			0.6	149814	1.06368e+06	2.27858e+08	8871.98	0.825035		0	2021-12-23	0.670171		1	0.00549899	0.000493903	0.00312847	0.140845	1	67253.6	2.26862e+08	0.329829	1.06368e+06	1.14283	292600	0.01074	0.825268	0.69159	0.000591039	0.00881475	0.000617697
2021-12-24	3.21015e+07	0			0.6	149171	1.05911e+06	2.27921e+08	8828.71	0.824572		0	2021-12-24	0.670356		1	0.00545448	0.000493893	0.00311503	0.140845	1	66908	2.26929e+08	0.329644	1.05911e+06	1.14283	292900	0.01071	0.824803	0.69159	0.00059101	0.00881197	0.000617672
2021-12-25	3.21103e+07	0			0.6	148533	1.05458e+06	2.27983e+08	8785.84	0.824111		0	2021-12-25	0.670539		1	0.0054104	0.000493883	0.00310171	0.140845	1	66565.3	2.26995e+08	0.329461	1.05458e+06	1.14283	293200	0.01068	0.824341	0.69159	0.00059098	0.0088092	0.000617647
2021-12-26	3.21191e+07	0			0.6	147901	1.0501e+06	2.28045e+08	8743.39	0.823652		0	2021-12-26	0.670722		1	0.00536676	0.000493873	0.00308852	0.140845	1	66225.6	2.27062e+08	0.329278	1.0501e+06	1.14283	293500	0.01065	0.823881	0.69159	0.000590951	0.00880643	0.000617622
2021-12-27	3.21278e+07	0			0.6	147275	1.04565e+06	2.28107e+08	8701.34	0.823196		0	2021-12-27	0.670903		1	0.00532354	0.000493863	0.00307544	0.140845	1	65888.8	2.27127e+08	0.329097	1.04565e+06	1.14283	293800	0.01062	0.823424	0.69159	0.000590922	0.00880367	0.000617597
2021-12-28	3.21364e+07	0			0.6	146654	1.04124e+06	2.28169e+08	8659.7	0.822741		0	2021-12-28	0.671084		1	0.00528074	0.000493853	0.00306248	0.140845	1	65555	2.27193e+08	0.328916	1.04124e+06	1.14283	294100	0.01059	0.822968	0.69159	0.000590893	0.00880091	0.000617572
2021-12-29	3.2145e+07	0			0.6	146039	1.03688e+06	2.2823e+08	8618.46	0.822289		0	2021-12-29	0.671264		1	0.00523837	0.000493843	0.00304965	0.140845	1	65224.2	2.27258e+08	0.328736	1.03688e+06	1.14283	294400	0.01056	0.822515	0.69159	0.000590864	0.00879816	0.000617546
2021-12-30	3.21536e+07	0			0.6	145431	1.03256e+06	2.28291e+08	8577.62	0.821839		0	2021-12-30	0.671443		1	0.00519642	0.000493833	0.00303693	0.140845	1	64896.3	2.27323e+08	0.328557	1.03256e+06	1.14283	294700	0.01053	0.822064	0.69159	0.000590835	0.00879542	0.000617521
2021-12-31	3.21622e+07	0			0.6	144827	1.02827e+06	2.28351e+08	8537.18	0.821392		0	2021-12-31	0.671622		1	0.00515488	0.000493823	0.00302434	0.140845	1	64571.4	2.27388e+08	0.328378	1.02827e+06	1.14283	295000	0.0105	0.821615	0.69159	0.000590805	0.00879267	0.000617496
2022-01-01	3.21707e+07	0			0.6	144230	1.02403e+06	2.28412e+08	8497.15	0.820946		0	2022-01-01	0.671799		1	0.00511374	0.000493813	0.00301186	0.140845	1	64249.4	2.27452e+08	0.328201	1.02403e+06	1.14283	295300	0.01047	0.821169	0.69159	0.000590776	0.00878994	0.000617471
2022-01-02	3.21791e+07	0			0.6	143638	1.01983e+06	2.28472e+08	8457.5	0.820502		0	2022-01-02	0.671976		1	0.00507302	0.000493803	0.00299951	0.140845	1	63930.4	2.27516e+08	0.328024	1.01983e+06	1.14283	295600	0.01044	0.820724	0.69159	0.000590747	0.00878721	0.000617446
2022-01-03	3.21875e+07	0			0.6	143052	1.01567e+06	2.28532e+08	8418.25	0.820061		0	2022-01-03	0.672152		1	0.00503269	0.000493793	0.00298727	0.140845	1	63614.4	2.27579e+08	0.327848	1.01567e+06	1.14283	295900	0.01041	0.820281	0.69159	0.000590718	0.00878449	0.000617421
2022-01-04	3.21959e+07	0			0.6	142472	1.01155e+06	2.28591e+08	8379.4	0.819621		0	2022-01-04	0.672326		1	0.00499277	0.000493783	0.00297515	0.140845	1	63301.3	2.27643e+08	0.327674	1.01155e+06	1.14283	296200	0.01038	0.819841	0.69159	0.000590689	0.00878177	0.000617396
2022-01-05	3.22043e+07	0			0.6	141897	1.00747e+06	2.2865e+08	8340.93	0.819184		0	2022-01-05	0.672501		1	0.00495324	0.000493774	0.00296315	0.140845	1	62991.1	2.27706e+08	0.327499	1.00747e+06	1.14283	296500	0.01035	0.819403	0.69159	0.00059066	0.00877906	0.000617371
2022-01-06	3.22126e+07	0			0.6	141328	1.00343e+06	2.28709e+08	8302.85	0.818748		0	2022-01-06	0.672674		1	0.0049141	0.000493764	0.00295126	0.140845	1	62683.8	2.27768e+08	0.327326	1.00343e+06	1.14283	296800	0.01032	0.818966	0.69159	0.000590631	0.00877635	0.000617346
2022-01-07	3.22208e+07	0			0.6	140764	999428	2.28768e+08	8265.15	0.818315		0	2022-01-07	0.672847		1	0.00487535	0.000493754	0.00293949	0.140845	1	62379.5	2.27831e+08	0.327153	999428	1.14283	297100	0.01029	0.818532	0.69159	0.000590602	0.00877365	0.000617321
2022-01-08	3.22291e+07	0			0.6	140206	995466	2.28826e+08	8227.83	0.817883		0	2022-01-08	0.673018		1	0.00483698	0.000493744	0.00292784	0.140845	1	62078.1	2.27893e+08	0.326982	995466	1.14283	297400	0.01026	0.818099	0.69159	0.000590573	0.00877095	0.000617296
2022-01-09	3.22372e+07	0			0.6	139654	991543	2.28884e+08	8190.89	0.817454		0	2022-01-09	0.67319		1	0.00479899	0.000493734	0.0029163	0.140845	1	61779.5	2.27955e+08	0.32681	991543	1.14283	297700	0.01023	0.817669	0.69159	0.000590544	0.00876826	0.000617271
2022-01-10	3.22454e+07	0			0.6	139107	987659	2.28942e+08	8154.33	0.817026		0	2022-01-10	0.67336		1	0.00476138	0.000493724	0.00290488	0.140845	1	61483.8	2.28016e+08	0.32664	987659	1.14283	298000	0.0102	0.81724	0.69159	0.000590514	0.00876557	0.000617246
2022-01-11	3.22535e+07	0			0.6	138565	983814	2.29e+08	8118.15	0.816601		0	2022-01-11	0.673529		1	0.00472414	0.000493714	0.00289357	0.140845	1	61191	2.28077e+08	0.326471	983814	1.14283	298300	0.01017	0.816813	0.69159	0.000590485	0.00876289	0.000617221
2022-01-12	3.22616e+07	0			0.6	138029	980008	2.29057e+08	8082.33	0.816177		0	2022-01-12	0.673698		1	0.00468726	0.000493704	0.00288238	0.140845	1	60901.1	2.28138e+08	0.326302	980008	1.14283	298600	0.01014	0.816389	0.69159	0.000590456	0.00876022	0.000617196
2022-01-13	3.22696e+07	0			0.6	137499	976240	2.29114e+08	8046.88	0.815755		0	2022-01-13	0.673866		1	0.00465075	0.000493694	0.00287129	0.140845	1	60614	2.28199e+08	0.326134	976240	1.14283	298900	0.01011	0.815966	0.69159	0.000590427	0.00875754	0.000617171
2022-01-14	3.22777e+07	0			0.6	136973	972509	2.29171e+08	8011.79	0.815335		0	2022-01-14	0.674033		1	0.0046146	0.000493684	0.00286032	0.140845	1	60329.7	2.28259e+08	0.325967	972509	1.14283	299200	0.01008	0.815545	0.69159	0.000590398	0.00875488	0.000617146
2022-01-15	3.22856e+07	0			0.6	136453	968817	2.29228e+08	7977.07	0.814916		0	2022-01-15	0.6742		1	0.00457881	0.000493674	0.00284946	0.140845	1	60048.3	2.28319e+08	0.3258	968817	1.14283	299500	0.01005	0.815126	0.69159	0.000590369	0.00875222	0.000617121
2022-01-16	3.22936e+07	0			0.6	135938	965162	2.29284e+08	7942.7	0.8145		0	2022-01-16	0.674366		1	0.00454337	0.000493664	0.00283871	0.140845	1	59769.6	2.28379e+08	0.325634	965162	1.14283	299800	0.01002	0.814708	0.69159	0.00059034	0.00874957	0.000617096
2022-01-17	3.23015e+07	0			0.6	135429	961544	2.29341e+08	7908.69	0.814085		0	2022-01-17	0.674531		1	0.00450827	0.000493654	0.00282807	0.140845	1	59493.7	2.28438e+08	0.325469	961544	1.14283	300100	0.00999	0.814293	0.69159	0.000590311	0.00874692	0.000617071
2022-01-18	3.23094e+07	0			0.6	134924	957963	2.29396e+08	7875.04	0.813672		0	2022-01-18	0.674695		1	0.00447352	0.000493644	0.00281754	0.140845	1	59220.6	2.28498e+08	0.325305	957963	1.14283	300400	0.00996	0.813879	0.69159	0.000590282	0.00874427	0.000617046
2022-01-19	3.23172e+07	0			0.6	134425	954419	2.29452e+08	7841.73	0.813261		0	2022-01-19	0.674859		1	0.00443911	0.000493634	0.00280711	0.140845	1	58950.2	2.28557e+08	0.325141	954419	1.14283	300700	0.00993	0.813467	0.69159	0.000590253	0.00874163	0.000617021
2022-01-20	3.2325e+07	0			0.6	133931	950911	2.29508e+08	7808.77	0.812852		0	2022-01-20	0.675022		1	0.00440504	0.000493624	0.0027968	0.140845	1	58682.6	2.28615e+08	0.324978	950911	1.14283	301000	0.0099	0.813057	0.69159	0.000590224	0.008739	0.000616996
2022-01-21	3.23328e+07	0			0.6	133442	947439	2.29563e+08	7776.15	0.812444		0	2022-01-21	0.675185		1	0.0043713	0.000493614	0.00278658	0.140845	1	58417.6	2.28674e+08	0.324815	947439	1.14283	301300	0.00987	0.812648	0.69159	0.000590195	0.00873637	0.000616971
2022-01-22	3.23405e+07	0			0.6	132958	944003	2.29618e+08	7743.87	0.812038		0	2022-01-22	0.675346		1	0.00433789	0.000493605	0.00277648	0.140845	1	58155.4	2.28732e+08	0.324654	944003	1.14283	301600	0.00984	0.812241	0.69159	0.000590166	0.00873375	0.000616947
2022-01-23	3.23482e+07	0			0.6	132479	940602	2.29673e+08	7711.93	0.811634		0	2022-01-23	0.675507		1	0.0043048	0.000493595	0.00276648	0.140845	1	57895.8	2.2879e+08	0.324493	940602	1.14283	301900	0.00981	0.811836	0.69159	0.000590137	0.00873113	0.000616922
2022-01-24	3.23559e+07	0			0.6	132005	937237	2.29727e+08	7680.33	0.811231		0	2022-01-24	0.675668		1	0.00427204	0.000493585	0.00275658	0.140845	1	57638.8	2.28847e+08	0.324332	937237	1.14283	302200	0.00978	0.811433	0.69159	0.000590108	0.00872852	0.000616897
2022-01-25	3.23636e+07	0			0.6	131536	933906	2.29781e+08	7649.05	0.81083		0	2022-01-25	0.675828		1	0.00423959	0.000493575	0.00274678	0.140845	1	57384.5	2.28905e+08	0.324172	933906	1.14283	302500	0.00975	0.811031	0.69159	0.000590079	0.00872591	0.000616872
2022-01-26	3.23712e+07	0			0.6	131072	930610	2.29835e+08	7618.1	0.810431		0	2022-01-26	0.675987		1	0.00420746	0.000493565	0.00273709	0.140845	1	57132.8	2.28962e+08	0.324013	930610	1.14283	302800	0.00972	0.810631	0.69159	0.00059005	0.00872331	0.000616847
2022-01-27	3.23788e+07	0			0.6	130612	927348	2.29889e+08	7587.48	0.810033		0	2022-01-27	0.676145		1	0.00417563	0.000493555	0.00272749	0.140845	1	56883.7	2.29019e+08	0.323855	927348	1.14283	303100	0.00969	0.810232	0.69159	0.000590021	0.00872071	0.000616822
2022-01-28	3.23863e+07	0			0.6	130158	924120	2.29943e+08	7557.17	0.809637		0	2022-01-28	0.676303		1	0.00414411	0.000493545	0.002718	0.140845	1	56637.2	2.29075e+08	0.323697	924120	1.14283	303400	0.00966	0.809835	0.69159	0.000589992	0.00871812	0.000616797
2022-01-29	3.23939e+07	0			0.6	129708	920926	2.29996e+08	7527.19	0.809243		0	2022-01-29	0.67646		1	0.0041129	0.000493535	0.00270861	0.140845	1	56393.2	2.29132e+08	0.32354	920926	1.14283	303700	0.00963	0.80944	0.69159	0.000589963	0.00871553	0.000616772
2022-01-30	3.24014e+07	0			0.6	129263	917765	2.3005e+08	7497.51	0.80885		0	2022-01-30	0.676617		1	0.00408198	0.000493525	0.00269931	0.140845	1	56151.7	2.29188e+08	0.323383	917765	1.14283	304000	0.0096	0.809046	0.69159	0.000589935	0.00871295	0.000616747
2022-01-31	3.24088e+07	0			0.6	128822	914638	2.30103e+08	7468.15	0.808458		0	2022-01-31	0.676773		1	0.00405136	0.000493515	0.00269011	0.140845	1	55912.8	2.29244e+08	0.323227	914638	1.14283	304300	0.00957	0.808654	0.69159	0.000589906	0.00871037	0.000616722
2022-02-01	3.24163e+07	0			0.6	128386	911542	2.30155e+08	7439.1	0.808069		0	2022-02-01	0.676928		1	0.00402103	0.000493505	0.00268101	0.140845	1	55676.3	2.293e+08	0.323072	911542	1.14283	304600	0.00954	0.808263	0.69159	0.000589877	0.0087078	0.000616697
2022-02-02	3.24237e+07	0			0.6	127955	908480	2.30208e+08	7410.35	0.80768		0	2022-02-02	0.677083		1	0.00399098	0.000493495	0.002672	0.140845	1	55442.3	2.29355e+08	0.322917	908480	1.14283	304900	0.00951	0.807874	0.69159	0.000589848	0.00870523	0.000616673
2022-02-03	3.24311e+07	0			0.6	127528	905449	2.30261e+08	7381.9	0.807293		0	2022-02-03	0.677237		1	0.00396122	0.000493485	0.00266308	0.140845	1	55210.7	2.2941e+08	0.322763	905449	1.14283	305200	0.00948	0.807487	0.69159	0.000589819	0.00870266	0.000616648
2022-02-04	3.24384e+07	0			0.6	127106	902450	2.30313e+08	7353.75	0.806908		0	2022-02-04	0.67739		1	0.00393174	0.000493476	0.00265426	0.140845	1	54981.5	2.29465e+08	0.32261	902450	1.14283	305500	0.00945	0.807101	0.69159	0.00058979	0.00870011	0.000616623
2022-02-05	3.24457e+07	0			0.6	126688	899482	2.30365e+08	7325.89	0.806524		0	2022-02-05	0.677543		1	0.00390254	0.000493466	0.00264554	0.140845	1	54754.7	2.2952e+08	0.322457	899482	1.14283	305800	0.00942	0.806716	0.69159	0.000589761	0.00869755	0.000616598
2022-02-06	3.2453e+07	0			0.6	126274	896546	2.30417e+08	7298.33	0.806142		0	2022-02-06	0.677696		1	0.00387361	0.000493456	0.0026369	0.140845	1	54530.3	2.29575e+08	0.322304	896546	1.14283	306100	0.00939	0.806333	0.69159	0.000589732	0.00869501	0.000616573
2022-02-07	3.24603e+07	0			0.6	125865	893640	2.30468e+08	7271.05	0.805761		0	2022-02-07	0.677848		1	0.00384495	0.000493446	0.00262835	0.140845	1	54308.3	2.29629e+08	0.322152	893640	1.14283	306400	0.00936	0.805951	0.69159	0.000589703	0.00869246	0.000616548
2022-02-08	3.24676e+07	0			0.6	125460	890764	2.3052e+08	7244.06	0.805381		0	2022-02-08	0.677999		1	0.00381656	0.000493436	0.00261989	0.140845	1	54088.5	2.29683e+08	0.322001	890764	1.14283	306700	0.00933	0.805571	0.69159	0.000589674	0.00868993	0.000616523
2022-02-09	3.24748e+07	0			0.6	125059	887919	2.30571e+08	7217.35	0.805003		0	2022-02-09	0.67815		1	0.00378843	0.000493426	0.00261153	0.140845	1	53871.1	2.29737e+08	0.32185	887919	1.14283	307000	0.0093	0.805192	0.69159	0.000589646	0.00868739	0.000616499
2022-02-10	3.2482e+07	0			0.6	124662	885103	2.30622e+08	7190.92	0.804626		0	2022-02-10	0.6783		1	0.00376056	0.000493416	0.00260325	0.140845	1	53655.9	2.2979e+08	0.3217	885103	1.14283	307300	0.00927	0.804814	0.69159	0.000589617	0.00868486	0.000616474
2022-02-11	3.24891e+07	0			0.6	124270	882317	2.30673e+08	7164.76	0.804251		0	2022-02-11	0.678449		1	0.00373295	0.000493406	0.00259505	0.140845	1	53443	2.29844e+08	0.321551	882317	1.14283	307600	0.00924	0.804438	0.69159	0.000589588	0.00868234	0.000616449
2022-02-12	3.24963e+07	0			0.6	123882	879560	2.30723e+08	7138.87	0.803877		0	2022-02-12	0.678598		1	0.00370559	0.000493396	0.00258694	0.140845	1	53232.4	2.29897e+08	0.321402	879560	1.14283	307900	0.00921	0.804064	0.69159	0.000589559	0.00867982	0.000616424
2022-02-13	3.25034e+07	0			0.6	123497	876832	2.30774e+08	7113.26	0.803504		0	2022-02-13	0.678747		1	0.00367848	0.000493386	0.00257892	0.140845	1	53023.9	2.2995e+08	0.321253	876832	1.14283	308200	0.00918	0.80369	0.69159	0.00058953	0.00867731	0.000616399
2022-02-14	3.25105e+07	0			0.6	123117	874132	2.30824e+08	7087.91	0.803132		0	2022-02-14	0.678895		1	0.00365161	0.000493376	0.00257098	0.140845	1	52817.6	2.30003e+08	0.321105	874132	1.14283	308500	0.00915	0.803318	0.69159	0.000589501	0.0086748	0.000616374
2022-02-15	3.25175e+07	0			0.6	122741	871461	2.30874e+08	7062.82	0.802762		0	2022-02-15	0.679043		1	0.00362499	0.000493367	0.00256312	0.140845	1	52613.5	2.30056e+08	0.320957	871461	1.14283	308800	0.00912	0.802947	0.69159	0.000589473	0.0086723	0.00061635
2022-02-16	3.25246e+07	0			0.6	122369	868817	2.30924e+08	7037.99	0.802394		0	2022-02-16	0.679189		1	0.00359861	0.000493357	0.00255534	0.140845	1	52411.5	2.30108e+08	0.320811	868817	1.14283	309100	0.00909	0.802578	0.69159	0.000589444	0.0086698	0.000616325
2022-02-17	3.25316e+07	0			0.6	122000	866201	2.30974e+08	7013.41	0.802026		0	2022-02-17	0.679336		1	0.00357247	0.000493347	0.00254765	0.140845	1	52211.6	2.3016e+08	0.320664	866201	1.14283	309400	0.00906	0.80221	0.69159	0.000589415	0.0086673	0.0006163
2022-02-18	3.25386e+07	0			0.6	121635	863612	2.31024e+08	6989.09	0.80166		0	2022-02-18	0.679482		1	0.00354655	0.000493337	0.00254003	0.140845	1	52013.9	2.30212e+08	0.320518	863612	1.14283	309700	0.00903	0.801843	0.69159	0.000589386	0.00866481	0.000616275
2022-02-19	3.25455e+07	0			0.6	121275	861049	2.31073e+08	6965.02	0.801295		0	2022-02-19	0.679627		1	0.00352087	0.000493327	0.0025325	0.140845	1	51818.1	2.30264e+08	0.320373	861049	1.14283	310000	0.009	0.801478	0.69159	0.000589358	0.00866233	0.00061625
2022-02-20	3.25525e+07	0			0.6	120917	858514	2.31123e+08	6941.19	0.800932		0	2022-02-20	0.679772		1	0.00349542	0.000493317	0.00252504	0.140845	1	51624.5	2.30316e+08	0.320228	858514	1.14283	310300	0.00897	0.801113	0.69159	0.000589329	0.00865985	0.000616226
2022-02-21	3.25594e+07	0			0.6	120564	856004	2.31172e+08	6917.61	0.800569		0	2022-02-21	0.679917		1	0.00347019	0.000493307	0.00251766	0.140845	1	51432.8	2.30367e+08	0.320083	856004	1.14283	310600	0.00894	0.80075	0.69159	0.0005893	0.00865737	0.000616201
2022-02-22	3.25663e+07	0			0.6	120214	853521	2.31221e+08	6894.27	0.800208		0	2022-02-22	0.680061		1	0.00344519	0.000493297	0.00251036	0.140845	1	51243.2	2.30418e+08	0.319939	853521	1.14283	310900	0.00891	0.800389	0.69159	0.000589271	0.0086549	0.000616176
2022-02-23	3.25732e+07	0			0.6	119868	851063	2.31269e+08	6871.17	0.799848		0	2022-02-23	0.680204		1	0.0034204	0.000493287	0.00250313	0.140845	1	51055.5	2.30469e+08	0.319796	851063	1.14283	311200	0.00888	0.800028	0.69159	0.000589242	0.00865244	0.000616151
2022-02-24	3.258e+07	0			0.6	119525	848630	2.31318e+08	6848.3	0.79949		0	2022-02-24	0.680347		1	0.00339583	0.000493278	0.00249597	0.140845	1	50869.8	2.3052e+08	0.319653	848630	1.14283	311500	0.00885	0.799669	0.69159	0.000589214	0.00864997	0.000616127
2022-02-25	3.25868e+07	0			0.6	119186	846223	2.31367e+08	6825.66	0.799132		0	2022-02-25	0.68049		1	0.00337147	0.000493268	0.00248889	0.140845	1	50686	2.30571e+08	0.31951	846223	1.14283	311800	0.00882	0.799311	0.69159	0.000589185	0.00864752	0.000616102
2022-02-26	3.25936e+07	0			0.6	118851	843840	2.31415e+08	6803.26	0.798776		0	2022-02-26	0.680632		1	0.00334732	0.000493258	0.00248188	0.140845	1	50504.1	2.30621e+08	0.319368	843840	1.14283	312100	0.00879	0.798954	0.69159	0.000589156	0.00864506	0.000616077
2022-02-27	3.26004e+07	0			0.6	118518	841481	2.31463e+08	6781.07	0.79842		0	2022-02-27	0.680773		1	0.00332337	0.000493248	0.00247494	0.140845	1	50324.1	2.30672e+08	0.319227	841481	1.14283	312400	0.00876	0.798598	0.69159	0.000589128	0.00864262	0.000616052
2022-02-28	3.26072e+07	0			0.6	118190	839147	2.31511e+08	6759.11	0.798066		0	2022-02-28	0.680915		1	0.00329964	0.000493238	0.00246808	0.140845	1	50146	2.30722e+08	0.319085	839147	1.14283	312700	0.00873	0.798243	0.69159	0.000589099	0.00864017	0.000616028
2022-03-01	3.26139e+07	0			0.6	117864	836836	2.31559e+08	6737.37	0.797714		0	2022-03-01	0.681055		1	0.0032761	0.000493228	0.00246128	0.140845	1	49969.7	2.30772e+08	0.318945	836836	1.14283	313000	0.0087	0.79789	0.69159	0.00058907	0.00863774	0.000616003
2022-03-02	3.26206e+07	0			0.6	117542	834549	2.31606e+08	6715.85	0.797362		0	2022-03-02	0.681195		1	0.00325276	0.000493218	0.00245456	0.140845	1	49795.2	2.30822e+08	0.318805	834549	1.14283	313300	0.00867	0.797538	0.69159	0.000589041	0.0086353	0.000615978
2022-03-03	3.26273e+07	0			0.6	117223	832285	2.31654e+08	6694.54	0.797011		0	2022-03-03	0.681335		1	0.00322962	0.000493208	0.0024479	0.140845	1	49622.5	2.30871e+08	0.318665	832285	1.14283	313600	0.00864	0.797187	0.69159	0.000589013	0.00863287	0.000615953
2022-03-04	3.2634e+07	0			0.6	116908	830044	2.31701e+08	6673.45	0.796662		0	2022-03-04	0.681475		1	0.00320667	0.000493199	0.00244131	0.140845	1	49451.6	2.30921e+08	0.318525	830044	1.14283	313900	0.00861	0.796837	0.69159	0.000588984	0.00863045	0.000615929
2022-03-05	3.26406e+07	0			0.6	116595	827826	2.31749e+08	6652.56	0.796313		0	2022-03-05	0.681614		1	0.00318392	0.000493189	0.00243478	0.140845	1	49282.5	2.3097e+08	0.318386	827826	1.14283	314200	0.00858	0.796488	0.69159	0.000588955	0.00862803	0.000615904
2022-03-06	3.26473e+07	0			0.6	116286	825629	2.31796e+08	6631.88	0.795966		0	2022-03-06	0.681752		1	0.00316135	0.000493179	0.00242832	0.140845	1	49115.1	2.31019e+08	0.318248	825629	1.14283	314500	0.00855	0.79614	0.69159	0.000588927	0.00862561	0.000615879
2022-03-07	3.26539e+07	0			0.6	115980	823455	2.31843e+08	6611.4	0.79562		0	2022-03-07	0.68189		1	0.00313897	0.000493169	0.00242193	0.140845	1	48949.3	2.31068e+08	0.31811	823455	1.14283	314800	0.00852	0.795793	0.69159	0.000588898	0.0086232	0.000615855
2022-03-08	3.26605e+07	0			0.6	115676	821303	2.31889e+08	6591.12	0.795275		0	2022-03-08	0.682028		1	0.00311677	0.000493159	0.0024156	0.140845	1	48785.3	2.31117e+08	0.317972	821303	1.14283	315100	0.00849	0.795447	0.69159	0.000588869	0.0086208	0.00061583
2022-03-09	3.26671e+07	0			0.6	115376	819172	2.31936e+08	6571.04	0.794931		0	2022-03-09	0.682165		1	0.00309475	0.000493149	0.00240933	0.140845	1	48622.9	2.31166e+08	0.317835	819172	1.14283	315400	0.00846	0.795103	0.69159	0.000588841	0.0086184	0.000615805
2022-03-10	3.26736e+07	0			0.6	115079	817062	2.31983e+08	6551.16	0.794588		0	2022-03-10	0.682302		1	0.00307291	0.000493139	0.00240312	0.140845	1	48462.2	2.31214e+08	0.317698	817062	1.14283	315700	0.00843	0.794759	0.69159	0.000588812	0.008616	0.00061578
2022-03-11	3.26801e+07	0			0.6	114785	814973	2.32029e+08	6531.46	0.794246		0	2022-03-11	0.682438		1	0.00305125	0.00049313	0.00239698	0.140845	1	48303.1	2.31262e+08	0.317562	814973	1.14283	316000	0.0084	0.794417	0.69159	0.000588783	0.00861361	0.000615756
2022-03-12	3.26866e+07	0			0.6	114494	812905	2.32075e+08	6511.96	0.793905		0	2022-03-12	0.682574		1	0.00302976	0.00049312	0.0023909	0.140845	1	48145.6	2.3131e+08	0.317426	812905	1.14283	316300	0.00837	0.794075	0.69159	0.000588755	0.00861122	0.000615731
2022-03-13	3.26931e+07	0			0.6	114205	810857	2.32121e+08	6492.65	0.793565		0	2022-03-13	0.68271		1	0.00300844	0.00049311	0.00238487	0.140845	1	47989.7	2.31358e+08	0.31729	810857	1.14283	316600	0.00834	0.793735	0.69159	0.000588726	0.00860883	0.000615706
2022-03-14	3.26996e+07	0			0.6	113920	808830	2.32167e+08	6473.52	0.793226		0	2022-03-14	0.682845		1	0.00298729	0.0004931	0.00237891	0.140845	1	47835.4	2.31406e+08	0.317155	808830	1.14283	316900	0.00831	0.793395	0.69159	0.000588698	0.00860646	0.000615682
2022-03-15	3.27061e+07	0			0.6	113637	806822	2.32213e+08	6454.57	0.792888		0	2022-03-15	0.68298		1	0.00296631	0.00049309	0.00237301	0.140845	1	47682.5	2.31454e+08	0.31702	806822	1.14283	317200	0.00828	0.793057	0.69159	0.000588669	0.00860408	0.000615657
2022-03-16	3.27125e+07	0			0.6	113357	804833	2.32259e+08	6435.81	0.792551		0	2022-03-16	0.683114		1	0.00294549	0.00049308	0.00236716	0.140845	1	47531.3	2.31501e+08	0.316886	804833	1.14283	317500	0.00825	0.792719	0.69159	0.00058864	0.00860171	0.000615632
2022-03-17	3.27189e+07	0			0.6	113079	802864	2.32304e+08	6417.22	0.792215		0	2022-03-17	0.683248		1	0.00292484	0.00049307	0.00236137	0.140845	1	47381.5	2.31549e+08	0.316752	802864	1.14283	317800	0.00822	0.792383	0.69159	0.000588612	0.00859934	0.000615608
2022-03-18	3.27253e+07	0			0.6	112805	800914	2.3235e+08	6398.8	0.79188		0	2022-03-18	0.683382		1	0.00290434	0.000493061	0.00235563	0.140845	1	47233.2	2.31596e+08	0.316618	800914	1.14283	318100	0.00819	0.792047	0.69159	0.000588583	0.00859698	0.000615583
2022-03-19	3.27317e+07	0			0.6	112533	798983	2.32395e+08	6380.56	0.791546		0	2022-03-19	0.683515		1	0.00288401	0.000493051	0.00234995	0.140845	1	47086.3	2.31643e+08	0.316485	798983	1.14283	318400	0.00816	0.791713	0.69159	0.000588555	0.00859463	0.000615559
2022-03-20	3.27381e+07	0			0.6	112263	797071	2.3244e+08	6362.49	0.791213		0	2022-03-20	0.683648		1	0.00286383	0.000493041	0.00234433	0.140845	1	46940.9	2.3169e+08	0.316352	797071	1.14283	318700	0.00813	0.791379	0.69159	0.000588526	0.00859227	0.000615534
2022-03-21	3.27444e+07	0			0.6	111997	795176	2.32485e+08	6344.59	0.79088		0	2022-03-21	0.68378		1	0.0028438	0.000493031	0.00233875	0.140845	1	46797	2.31737e+08	0.31622	795176	1.14283	319000	0.0081	0.791046	0.69159	0.000588497	0.00858992	0.000615509
2022-03-22	3.27507e+07	0			0.6	111732	793300	2.3253e+08	6326.86	0.790549		0	2022-03-22	0.683912		1	0.00282393	0.000493021	0.00233324	0.140845	1	46654.4	2.31784e+08	0.316088	793300	1.14283	319300	0.00807	0.790715	0.69159	0.000588469	0.00858758	0.000615485
2022-03-23	3.2757e+07	0			0.6	111471	791442	2.32575e+08	6309.28	0.790219		0	2022-03-23	0.684044		1	0.00280421	0.000493011	0.00232777	0.140845	1	46513.2	2.3183e+08	0.315956	791442	1.14283	319600	0.00804	0.790384	0.69159	0.00058844	0.00858524	0.00061546
2022-03-24	3.27633e+07	0			0.6	111211	789601	2.3262e+08	6291.87	0.78989		0	2022-03-24	0.684176		1	0.00278463	0.000493001	0.00232235	0.140845	1	46373.4	2.31876e+08	0.315824	789601	1.14283	319900	0.00801	0.790054	0.69159	0.000588412	0.00858291	0.000615435
2022-03-25	3.27696e+07	0			0.6	110955	787777	2.32664e+08	6274.62	0.789561		0	2022-03-25	0.684307		1	0.0027652	0.000492992	0.00231699	0.140845	1	46234.9	2.31923e+08	0.315693	787777	1.14283	320200	0.00798	0.789725	0.69159	0.000588383	0.00858057	0.000615411
2022-03-26	3.27759e+07	0			0.6	110700	785971	2.32709e+08	6257.53	0.789233		0	2022-03-26	0.684437		1	0.00274591	0.000492982	0.00231168	0.140845	1	46097.8	2.31969e+08	0.315563	785971	1.14283	320500	0.00795	0.789397	0.69159	0.000588355	0.00857825	0.000615386
2022-03-27	3.27821e+07	0			0.6	110448	784181	2.32753e+08	6240.59	0.788907		0	2022-03-27	0.684568		1	0.00272677	0.000492972	0.00230641	0.140845	1	45962	2.32015e+08	0.315432	784181	1.14283	320800	0.00792	0.78907	0.69159	0.000588326	0.00857593	0.000615362
2022-03-28	3.27883e+07	0			0.6	110198	782408	2.32797e+08	6223.8	0.788581		0	2022-03-28	0.684698		1	0.00270777	0.000492962	0.0023012	0.140845	1	45827.5	2.32061e+08	0.315302	782408	1.14283	321100	0.00789	0.788744	0.69159	0.000588298	0.00857361	0.000615337
2022-03-29	3.27945e+07	0			0.6	109951	780651	2.32841e+08	6207.16	0.788256		0	2022-03-29	0.684827		1	0.0026889	0.000492952	0.00229603	0.140845	1	45694.2	2.32106e+08	0.315173	780651	1.14283	321400	0.00786	0.788419	0.69159	0.000588269	0.00857129	0.000615312
2022-03-30	3.28007e+07	0			0.6	109706	778911	2.32885e+08	6190.68	0.787932		0	2022-03-30	0.684956		1	0.00267018	0.000492942	0.00229091	0.140845	1	45562.2	2.32152e+08	0.315044	778911	1.14283	321700	0.00783	0.788094	0.69159	0.000588241	0.00856898	0.000615288
2022-03-31	3.28069e+07	0			0.6	109463	777186	2.32929e+08	6174.33	0.787609		0	2022-03-31	0.685085		1	0.00265159	0.000492933	0.00228584	0.140845	1	45431.5	2.32197e+08	0.314915	777186	1.14283	322000	0.0078	0.78777	0.69159	0.000588212	0.00856668	0.000615263
2022-04-01	3.28131e+07	0			0.6	109222	775478	2.32973e+08	6158.14	0.787286		0	2022-04-01	0.685214		1	0.00263313	0.000492923	0.00228082	0.140845	1	45302	2.32243e+08	0.314786	775478	1.14283	322300	0.00777	0.787448	0.69159	0.000588184	0.00856438	0.000615239
2022-04-02	3.28192e+07	0			0.6	108984	773785	2.33016e+08	6142.08	0.786965		0	2022-04-02	0.685342		1	0.0026148	0.000492913	0.00227584	0.140845	1	45173.7	2.32288e+08	0.314658	773785	1.14283	322600	0.00774	0.787126	0.69159	0.000588155	0.00856208	0.000615214
2022-04-03	3.28253e+07	0			0.6	108747	772107	2.3306e+08	6126.17	0.786644		0	2022-04-03	0.68547		1	0.0025966	0.000492903	0.0022709	0.140845	1	45046.6	2.32333e+08	0.31453	772107	1.14283	322900	0.00771	0.786805	0.69159	0.000588127	0.00855979	0.00061519
2022-04-04	3.28314e+07	0			0.6	108513	770444	2.33103e+08	6110.4	0.786325		0	2022-04-04	0.685598		1	0.00257853	0.000492893	0.00226601	0.140845	1	44920.7	2.32378e+08	0.314402	770444	1.14283	323200	0.00768	0.786484	0.69159	0.000588098	0.0085575	0.000615165
2022-04-05	3.28375e+07	0			0.6	108281	768796	2.33147e+08	6094.76	0.786006		0	2022-04-05	0.685725		1	0.00256059	0.000492884	0.00226116	0.140845	1	44795.9	2.32423e+08	0.314275	768796	1.14283	323500	0.00765	0.786165	0.69159	0.00058807	0.00855522	0.00061514
2022-04-06	3.28436e+07	0			0.6	108051	767163	2.3319e+08	6079.25	0.785687		0	2022-04-06	0.685852		1	0.00254277	0.000492874	0.00225636	0.140845	1	44672.3	2.32467e+08	0.314148	767163	1.14283	323800	0.00762	0.785846	0.69159	0.000588041	0.00855294	0.000615116
2022-04-07	3.28497e+07	0			0.6	107823	765544	2.33233e+08	6063.88	0.78537		0	2022-04-07	0.685979		1	0.00252508	0.000492864	0.0022516	0.140845	1	44549.8	2.32512e+08	0.314021	765544	1.14283	324100	0.00759	0.785529	0.69159	0.000588013	0.00855066	0.000615091
2022-04-08	3.28557e+07	0			0.6	107597	763940	2.33276e+08	6048.64	0.785053		0	2022-04-08	0.686105		1	0.0025075	0.000492854	0.00224688	0.140845	1	44428.4	2.32556e+08	0.313895	763940	1.14283	324400	0.00756	0.785212	0.69159	0.000587985	0.00854839	0.000615067
2022-04-09	3.28618e+07	0			0.6	107373	762349	2.33319e+08	6033.54	0.784738		0	2022-04-09	0.686231		1	0.00249005	0.000492844	0.0022422	0.140845	1	44308.2	2.326e+08	0.313769	762349	1.14283	324700	0.00753	0.784896	0.69159	0.000587956	0.00854612	0.000615042
2022-04-10	3.28678e+07	0			0.6	107151	760773	2.33361e+08	6018.55	0.784423		0	2022-04-10	0.686357		1	0.00247272	0.000492834	0.00223757	0.140845	1	44189	2.32645e+08	0.313643	760773	1.14283	325000	0.0075	0.78458	0.69159	0.000587928	0.00854386	0.000615018
2022-04-11	3.28738e+07	0			0.6	106931	759210	2.33404e+08	6003.7	0.784108		0	2022-04-11	0.686482		1	0.0024555	0.000492825	0.00223297	0.140845	1	44070.9	2.32689e+08	0.313518	759210	1.14283	325300	0.00747	0.784266	0.69159	0.000587899	0.0085416	0.000614993
2022-04-12	3.28798e+07	0			0.6	106713	757661	2.33446e+08	5988.96	0.783795		0	2022-04-12	0.686607		1	0.0024384	0.000492815	0.00222841	0.140845	1	43953.8	2.32733e+08	0.313393	757661	1.14283	325600	0.00744	0.783952	0.69159	0.000587871	0.00853934	0.000614969
2022-04-13	3.28857e+07	0			0.6	106496	756125	2.33489e+08	5974.35	0.783482		0	2022-04-13	0.686732		1	0.00242141	0.000492805	0.0022239	0.140845	1	43837.8	2.32777e+08	0.313268	756125	1.14283	325900	0.00741	0.783639	0.69159	0.000587842	0.00859927	0.000617603
2022-04-14	3.28917e+07	0			0.6	106282	754602	2.33531e+08	5959.87	0.78317		0	2022-04-14	0.686856		1	0.00240454	0.000492795	0.00221942	0.140845	1	43722.8	2.3282e+08	0.313144	754602	1.14283	326200	0.00738	0.783326	0.69159	0.000587814	0.00866047	0.000620306
2022-04-15	3.28977e+07	0			0.6	106069	753093	2.33573e+08	5945.5	0.782859		0	2022-04-15	0.68698		1	0.00238778	0.000492785	0.00221498	0.140845	1	43608.8	2.32864e+08	0.31302	753093	1.14283	326500	0.00735	0.783015	0.69159	0.000587786	0.00872288	0.00062308
2022-04-16	3.29036e+07	0			0.6	105859	751596	2.33615e+08	5931.24	0.782549		0	2022-04-16	0.687104		1	0.00237113	0.000492776	0.00221058	0.140845	1	43495.8	2.32907e+08	0.312896	751596	1.14283	326800	0.00732	0.782704	0.69159	0.000587757	0.00878652	0.000625925
2022-04-17	3.29095e+07	0			0.6	105649	750111	2.33657e+08	5917.11	0.782239		0	2022-04-17	0.687228		1	0.00235458	0.000492766	0.00220621	0.140845	1	43383.8	2.32951e+08	0.312772	750111	1.14283	327100	0.00729	0.782394	0.69159	0.000587729	0.0088514	0.000628844
2022-04-18	3.29154e+07	0			0.6	105442	748639	2.33699e+08	5903.08	0.78193		0	2022-04-18	0.687351		1	0.00233815	0.000492756	0.00220188	0.140845	1	43272.8	2.32994e+08	0.312649	748639	1.14283	327400	0.00726	0.782085	0.69159	0.000587701	0.00885538	0.00062918
2022-04-19	3.29213e+07	0			0.6	105237	747180	2.33741e+08	5889.17	0.781622		0	2022-04-19	0.687474		1	0.00232182	0.000492746	0.00219759	0.140845	1	43162.7	2.33037e+08	0.312526	747180	1.14283	327700	0.00723	0.781776	0.69159	0.000587672	0.00892155	0.000632183
2022-04-20	3.29272e+07	0			0.6	105033	745732	2.33783e+08	5875.37	0.781315		0	2022-04-20	0.687597		1	0.0023056	0.000492736	0.00219333	0.140845	1	43053.6	2.3308e+08	0.312403	745732	1.14283	328000	0.0072	0.781468	0.69159	0.000587644	0.00898909	0.000635265
2022-04-21	3.2933e+07	0			0.6	104830	744296	2.33825e+08	5861.68	0.781008		0	2022-04-21	0.687719		1	0.00228947	0.000492727	0.00218911	0.140845	1	42945.4	2.33123e+08	0.312281	744296	1.14283	328300	0.00717	0.781161	0.69159	0.000587615	0.00905795	0.000638427
2022-04-22	3.29389e+07	0			0.6	104630	742873	2.33866e+08	5848.1	0.780702		0	2022-04-22	0.687841		1	0.00227346	0.000492717	0.00218492	0.140845	1	42838.1	2.33166e+08	0.312159	742873	1.14283	328600	0.00714	0.780855	0.69159	0.000587587	0.00912815	0.00064167
2022-04-23	3.29447e+07	0			0.6	104431	741460	2.33907e+08	5834.63	0.780397		0	2022-04-23	0.687963		1	0.00225754	0.000492707	0.00218077	0.140845	1	42731.7	2.33209e+08	0.312037	741460	1.14283	328900	0.00711	0.780549	0.69159	0.000587559	0.00919969	0.000644998
2022-04-24	3.29505e+07	0			0.6	104234	740060	2.33949e+08	5821.26	0.780092		0	2022-04-24	0.688085		1	0.00224172	0.000492697	0.00217665	0.140845	1	42626.2	2.33251e+08	0.311915	740060	1.14283	329200	0.00708	0.780244	0.69159	0.000587531	0.00927262	0.000648411
2022-04-25	3.29563e+07	0			0.6	104038	738670	2.3399e+08	5807.99	0.779788		0	2022-04-25	0.688206		1	0.002226	0.000492687	0.00217256	0.140845	1	42521.6	2.33294e+08	0.311794	738670	1.14283	329500	0.00705	0.77994	0.69159	0.000587502	0.00934694	0.000651913
2022-04-26	3.29621e+07	0			0.6	103844	737292	2.34031e+08	5794.83	0.779485		0	2022-04-26	0.688327		1	0.00221038	0.000492678	0.00216851	0.140845	1	42417.9	2.33336e+08	0.311673	737292	1.14283	329800	0.00702	0.779637	0.69159	0.000587474	0.00942268	0.000655506
2022-04-27	3.29679e+07	0			0.6	103651	735924	2.34072e+08	5781.77	0.779182		0	2022-04-27	0.688448		1	0.00219486	0.000492668	0.00216448	0.140845	1	42315	2.33379e+08	0.311552	735924	1.14283	330100	0.00699	0.779334	0.69159	0.000587446	0.00949987	0.000659191
2022-04-28	3.29737e+07	0			0.6	103460	734568	2.34113e+08	5768.81	0.778881		0	2022-04-28	0.688568		1	0.00217943	0.000492658	0.00216049	0.140845	1	42213	2.33421e+08	0.311432	734568	1.14283	330400	0.00696	0.779032	0.69159	0.000587417	0.00951503	0.000660244
2022-04-29	3.29794e+07	0			0.6	103271	733222	2.34154e+08	5755.94	0.778579		0	2022-04-29	0.688688		1	0.00216409	0.000492648	0.00215654	0.140845	1	42111.8	2.33463e+08	0.311312	733222	1.14283	330700	0.00693	0.77873	0.69159	0.000587389	0.00952902	0.000661253
2022-04-30	3.29852e+07	0			0.6	103083	731887	2.34195e+08	5743.18	0.778279		0	2022-04-30	0.688808		1	0.00214885	0.000492638	0.00215261	0.140845	1	42011.4	2.33505e+08	0.311192	731887	1.14283	331000	0.0069	0.778429	0.69159	0.000587361	0.00954191	0.000662217
2022-05-01	3.29909e+07	0			0.6	102896	730562	2.34236e+08	5730.5	0.777979		0	2022-05-01	0.688928		1	0.0021337	0.000492629	0.00214871	0.140845	1	41911.9	2.33547e+08	0.311072	730562	1.14283	331300	0.00687	0.778129	0.69159	0.000587332	0.00955364	0.000663131
2022-05-02	3.29966e+07	0			0.6	102711	729247	2.34276e+08	5717.93	0.77768		0	2022-05-02	0.689047		1	0.00211864	0.000492619	0.00214485	0.140845	1	41813.1	2.33589e+08	0.310953	729247	1.14283	331600	0.00684	0.77783	0.69159	0.000587304	0.00956417	0.000663993
2022-05-03	3.30023e+07	0			0.6	102527	727943	2.34317e+08	5705.44	0.777381		0	2022-05-03	0.689167		1	0.00210368	0.000492609	0.00214101	0.140845	1	41715.2	2.3363e+08	0.310833	727943	1.14283	331900	0.00681	0.777531	0.69159	0.000587276	0.00957478	0.000664868
2022-05-04	3.3008e+07	0			0.6	102345	726648	2.34357e+08	5693.05	0.777084		0	2022-05-04	0.689285		1	0.0020888	0.000492599	0.0021372	0.140845	1	41618	2.33672e+08	0.310715	726648	1.14283	332200	0.00678	0.777233	0.69159	0.000587248	0.00958413	0.000665688
2022-05-05	3.30137e+07	0			0.6	102164	725364	2.34397e+08	5680.75	0.776786		0	2022-05-05	0.689404		1	0.002074	0.000492589	0.00213342	0.140845	1	41521.5	2.33714e+08	0.310596	725364	1.14283	332500	0.00675	0.776935	0.69159	0.000587219	0.00959219	0.000666449
2022-05-06	3.30194e+07	0			0.6	101984	724089	2.34438e+08	5668.54	0.77649		0	2022-05-06	0.689522		1	0.0020593	0.00049258	0.00212967	0.140845	1	41425.9	2.33755e+08	0.310478	724089	1.14283	332800	0.00672	0.776638	0.69159	0.000587191	0.0095989	0.000667148
2022-05-07	3.3025e+07	0			0.6	101806	722823	2.34478e+08	5656.41	0.776194		0	2022-05-07	0.689641		1	0.00204468	0.00049257	0.00212595	0.140845	1	41330.9	2.33796e+08	0.310359	722823	1.14283	333100	0.00669	0.776342	0.69159	0.000587163	0.00960421	0.00066778
2022-05-08	3.30307e+07	0			0.6	101629	721568	2.34518e+08	5644.38	0.775899		0	2022-05-08	0.689758		1	0.00203015	0.00049256	0.00212226	0.140845	1	41236.8	2.33838e+08	0.310242	721568	1.14283	333400	0.00666	0.776046	0.69159	0.000587135	0.00960807	0.000668342
2022-05-09	3.30363e+07	0			0.6	101454	720321	2.34558e+08	5632.43	0.775604		0	2022-05-09	0.689876		1	0.0020157	0.00049255	0.00211859	0.140845	1	41143.3	2.33879e+08	0.310124	720321	1.14283	333700	0.00663	0.775751	0.69159	0.000587107	0.00961042	0.00066883
2022-05-10	3.30419e+07	0			0.6	101279	719084	2.34598e+08	5620.56	0.77531		0	2022-05-10	0.689993		1	0.00200133	0.000492541	0.00211495	0.140845	1	41050.6	2.3392e+08	0.310007	719084	1.14283	334000	0.0066	0.775457	0.69159	0.000587078	0.00961122	0.00066924
2022-05-11	3.30475e+07	0			0.6	101106	717856	2.34638e+08	5608.78	0.775016		0	2022-05-11	0.690111		1	0.00198704	0.000492531	0.00211134	0.140845	1	40958.5	2.33961e+08	0.309889	717856	1.14283	334300	0.00657	0.775163	0.69159	0.00058705	0.0096104	0.000669567
2022-05-12	3.30531e+07	0			0.6	100935	716636	2.34677e+08	5597.08	0.774724		0	2022-05-12	0.690227		1	0.00197284	0.000492521	0.00210775	0.140845	1	40867.2	2.34002e+08	0.309773	716636	1.14283	334600	0.00654	0.77487	0.69159	0.000587022	0.00960791	0.000669808
2022-05-13	3.30587e+07	0			0.6	100764	715426	2.34717e+08	5585.46	0.774431		0	2022-05-13	0.690344		1	0.00195872	0.000492511	0.00210419	0.140845	1	40776.5	2.34042e+08	0.309656	715426	1.14283	334900	0.00651	0.774578	0.69159	0.000586994	0.00960505	0.000670027
2022-05-14	3.30643e+07	0			0.6	100595	714224	2.34757e+08	5573.93	0.77414		0	2022-05-14	0.69046		1	0.00194468	0.000492502	0.00210066	0.140845	1	40686.6	2.34083e+08	0.30954	714224	1.14283	335200	0.00648	0.774286	0.69159	0.000586966	0.00960183	0.000670225
2022-05-15	3.30699e+07	0			0.6	100427	713031	2.34796e+08	5562.47	0.773849		0	2022-05-15	0.690577		1	0.00193071	0.000492492	0.00209715	0.140845	1	40597.3	2.34124e+08	0.309423	713031	1.14283	335500	0.00645	0.773994	0.69159	0.000586937	0.00959827	0.000670404
2022-05-16	3.30754e+07	0			0.6	100260	711847	2.34835e+08	5551.09	0.773558		0	2022-05-16	0.690693		1	0.00191682	0.000492482	0.00209367	0.140845	1	40508.6	2.34164e+08	0.309307	711847	1.14283	335800	0.00642	0.773704	0.69159	0.000586909	0.00959439	0.000670563
2022-05-17	3.3081e+07	0			0.6	100094	710670	2.34875e+08	5539.79	0.773269		0	2022-05-17	0.690808		1	0.00190302	0.000492472	0.00209021	0.140845	1	40420.7	2.34205e+08	0.309192	710670	1.14283	336100	0.00639	0.773414	0.69159	0.000586881	0.00959021	0.000670704
2022-05-18	3.30865e+07	0			0.6	99929.9	709503	2.34914e+08	5528.56	0.772979		0	2022-05-18	0.690924		1	0.00188928	0.000492462	0.00208677	0.140845	1	40333.3	2.34245e+08	0.309076	709503	1.14283	336400	0.00636	0.773124	0.69159	0.000586853	0.00958573	0.000670826
2022-05-19	3.3092e+07	0			0.6	99766.6	708343	2.34953e+08	5517.41	0.772691		0	2022-05-19	0.691039		1	0.00187562	0.000492453	0.00208336	0.140845	1	40246.6	2.34285e+08	0.308961	708343	1.14283	336700	0.00633	0.772835	0.69159	0.000586825	0.00958097	0.00067093
2022-05-20	3.30975e+07	0			0.6	99604.4	707191	2.34992e+08	5506.34	0.772403		0	2022-05-20	0.691154		1	0.00186204	0.000492443	0.00207997	0.140845	1	40160.5	2.34325e+08	0.308846	707191	1.14283	337000	0.0063	0.772547	0.69159	0.000586797	0.00957595	0.000671017
2022-05-21	3.3103e+07	0			0.6	99443.3	706048	2.35031e+08	5495.34	0.772115		0	2022-05-21	0.691269		1	0.00184853	0.000492433	0.00207661	0.140845	1	40075.1	2.34365e+08	0.308731	706048	1.14283	337300	0.00627	0.772259	0.69159	0.000586768	0.00957069	0.000671089
2022-05-22	3.31085e+07	0			0.6	99283.4	704912	2.3507e+08	5484.41	0.771828		0	2022-05-22	0.691383		1	0.0018351	0.000492423	0.00207327	0.140845	1	39990.2	2.34405e+08	0.308617	704912	1.14283	337600	0.00624	0.771972	0.69159	0.00058674	0.00956522	0.000671145
2022-05-23	3.3114e+07	0			0.6	99124.5	703784	2.35109e+08	5473.55	0.771542		0	2022-05-23	0.691497		1	0.00182173	0.000492414	0.00206995	0.140845	1	39906	2.34445e+08	0.308503	703784	1.14283	337900	0.00621	0.771685	0.69159	0.000586712	0.00955958	0.000671189
2022-05-24	3.31194e+07	0			0.6	98966.7	702663	2.35148e+08	5462.77	0.771256		0	2022-05-24	0.691612		1	0.00180844	0.000492404	0.00206666	0.140845	1	39822.3	2.34485e+08	0.308388	702663	1.14283	338200	0.00618	0.771399	0.69159	0.000586684	0.00955377	0.000671221
2022-05-25	3.31249e+07	0			0.6	98810	701551	2.35187e+08	5452.05	0.770971		0	2022-05-25	0.691725		1	0.00179522	0.000492394	0.00206338	0.140845	1	39739.3	2.34525e+08	0.308275	701551	1.14283	338500	0.00615	0.771114	0.69159	0.000586656	0.00954785	0.000671243
2022-05-26	3.31303e+07	0			0.6	98654.3	700445	2.35225e+08	5441.4	0.770687		0	2022-05-26	0.691839		1	0.00178207	0.000492384	0.00206013	0.140845	1	39656.8	2.34564e+08	0.308161	700445	1.14283	338800	0.00612	0.770829	0.69159	0.000586628	0.00954183	0.000671257
2022-05-27	3.31357e+07	0			0.6	98499.6	699347	2.35264e+08	5430.82	0.770402		0	2022-05-27	0.691952		1	0.00176898	0.000492375	0.0020569	0.140845	1	39574.9	2.34604e+08	0.308048	699347	1.14283	339100	0.00609	0.770545	0.69159	0.0005866	0.00953576	0.000671265
2022-05-28	3.31412e+07	0			0.6	98346	698257	2.35302e+08	5420.31	0.770119		0	2022-05-28	0.692066		1	0.00175597	0.000492365	0.0020537	0.140845	1	39493.5	2.34644e+08	0.307934	698257	1.14283	339400	0.00606	0.770261	0.69159	0.000586572	0.00952963	0.000671268
2022-05-29	3.31466e+07	0			0.6	98193.4	697173	2.35341e+08	5409.87	0.769836		0	2022-05-29	0.692179		1	0.00174303	0.000492355	0.00205051	0.140845	1	39412.7	2.34683e+08	0.307821	697173	1.14283	339700	0.00603	0.769977	0.69159	0.000586544	0.00952346	0.000671266
2022-05-30	3.3152e+07	0			0.6	98041.8	696097	2.35379e+08	5399.49	0.769554		0	2022-05-30	0.692291		1	0.00173015	0.000492345	0.00204734	0.140845	1	39332.5	2.34722e+08	0.307709	696097	1.14283	340000	0.006	0.769695	0.69159	0.000586516	0.00951725	0.000671259
2022-05-31	3.31574e+07	0			0.6	97891.2	695028	2.35417e+08	5389.17	0.769272		0	2022-05-31	0.692404		1	0.00171734	0.000492336	0.0020442	0.140845	1	39252.8	2.34762e+08	0.307596	695028	1.14283	340300	0.00597	0.769413	0.69159	0.000586488	0.00951101	0.000671248
2022-06-01	3.31627e+07	0			0.6	97741.6	693965	2.35456e+08	5378.92	0.76899		0	2022-06-01	0.692516		1	0.00170459	0.000492326	0.00204107	0.140845	1	39173.6	2.34801e+08	0.307484	693965	1.14283	340600	0.00594	0.769131	0.69159	0.000586459	0.00950474	0.000671233
2022-06-02	3.31681e+07	0			0.6	97592.9	692910	2.35494e+08	5368.74	0.76871		0	2022-06-02	0.692628		1	0.00169192	0.000492316	0.00203797	0.140845	1	39095	2.3484e+08	0.307372	692910	1.14283	340900	0.00591	0.76885	0.69159	0.000586431	0.00949846	0.000671215
2022-06-03	3.31735e+07	0			0.6	97445.2	691861	2.35532e+08	5358.61	0.768429		0	2022-06-03	0.69274		1	0.0016793	0.000492306	0.00203488	0.140845	1	39016.9	2.34879e+08	0.30726	691861	1.14283	341200	0.00588	0.768569	0.69159	0.000586403	0.00949216	0.000671193
2022-06-04	3.31788e+07	0			0.6	97298.4	690818	2.3557e+08	5348.55	0.768149		0	2022-06-04	0.692852		1	0.00166675	0.000492297	0.00203182	0.140845	1	38939.3	2.34918e+08	0.307148	690818	1.14283	341500	0.00585	0.768289	0.69159	0.000586375	0.00948585	0.000671168
2022-06-05	3.31842e+07	0			0.6	97152.5	689783	2.35608e+08	5338.55	0.76787		0	2022-06-05	0.692963		1	0.00165426	0.000492287	0.00202877	0.140845	1	38862.2	2.34957e+08	0.307037	689783	1.14283	341800	0.00582	0.76801	0.69159	0.000586347	0.00947953	0.000671141
2022-06-06	3.31895e+07	0			0.6	97007.6	688754	2.35645e+08	5328.61	0.767592		0	2022-06-06	0.693075		1	0.00164184	0.000492277	0.00202575	0.140845	1	38785.6	2.34995e+08	0.306925	688754	1.14283	342100	0.00579	0.767731	0.69159	0.000586319	0.00947321	0.000671112
2022-06-07	3.31948e+07	0			0.6	96863.5	687731	2.35683e+08	5318.73	0.767313		0	2022-06-07	0.693186		1	0.00162948	0.000492268	0.00202274	0.140845	1	38709.5	2.35034e+08	0.306814	687731	1.14283	342400	0.00576	0.767452	0.69159	0.000586291	0.0094669	0.000671081
2022-06-08	3.32001e+07	0			0.6	96720.4	686715	2.35721e+08	5308.91	0.767036		0	2022-06-08	0.693297		1	0.00161718	0.000492258	0.00201975	0.140845	1	38634	2.35073e+08	0.306703	686715	1.14283	342700	0.00573	0.767175	0.69159	0.000586263	0.00946059	0.000671049
2022-06-09	3.32054e+07	0			0.6	96578.1	685705	2.35758e+08	5299.14	0.766759		0	2022-06-09	0.693407		1	0.00160494	0.000492248	0.00201678	0.140845	1	38558.8	2.35111e+08	0.306593	685705	1.14283	343000	0.0057	0.766897	0.69159	0.000586235	0.00945429	0.000671014
2022-06-10	3.32107e+07	0			0.6	96436.8	684701	2.35796e+08	5289.44	0.766482		0	2022-06-10	0.693518		1	0.00159277	0.000492238	0.00201383	0.140845	1	38484.2	2.3515e+08	0.306482	684701	1.14283	343300	0.00567	0.76662	0.69159	0.000586207	0.00944801	0.000670979
2022-06-11	3.3216e+07	0			0.6	96296.2	683703	2.35834e+08	5279.79	0.766206		0	2022-06-11	0.693628		1	0.00158065	0.000492229	0.00201089	0.140845	1	38410.1	2.35188e+08	0.306372	683703	1.14283	343600	0.00564	0.766344	0.69159	0.000586179	0.00944173	0.000670943
2022-06-12	3.32213e+07	0			0.6	96156.6	682712	2.35871e+08	5270.19	0.76593		0	2022-06-12	0.693738		1	0.00156859	0.000492219	0.00200798	0.140845	1	38336.4	2.35227e+08	0.306262	682712	1.14283	343900	0.00561	0.766068	0.69159	0.000586151	0.00943547	0.000670905
2022-06-13	3.32265e+07	0			0.6	96017.7	681726	2.35908e+08	5260.66	0.765655		0	2022-06-13	0.693848		1	0.00155659	0.000492209	0.00200508	0.140845	1	38263.1	2.35265e+08	0.306152	681726	1.14283	344200	0.00558	0.765793	0.69159	0.000586123	0.00942922	0.000670867
2022-06-14	3.32318e+07	0			0.6	95879.7	680746	2.35946e+08	5251.17	0.76538		0	2022-06-14	0.693958		1	0.00154465	0.000492199	0.00200219	0.140845	1	38190.4	2.35303e+08	0.306042	680746	1.14283	344500	0.00555	0.765518	0.69159	0.000586095	0.00942299	0.000670828
2022-06-15	3.3237e+07	0			0.6	95742.5	679772	2.35983e+08	5241.75	0.765106		0	2022-06-15	0.694067		1	0.00153277	0.00049219	0.00199933	0.140845	1	38118	2.35341e+08	0.305933	679772	1.14283	344800	0.00552	0.765243	0.69159	0.000586067	0.00941678	0.000670788
2022-06-16	3.32422e+07	0			0.6	95606.2	678804	2.3602e+08	5232.37	0.764833		0	2022-06-16	0.694176		1	0.00152094	0.00049218	0.00199648	0.140845	1	38046.2	2.35379e+08	0.305824	678804	1.14283	345100	0.00549	0.764969	0.69159	0.000586039	0.00941058	0.000670747
2022-06-17	3.32475e+07	0			0.6	95470.6	677841	2.36057e+08	5223.05	0.764559		0	2022-06-17	0.694285		1	0.00150918	0.00049217	0.00199365	0.140845	1	37974.7	2.35417e+08	0.305715	677841	1.14283	345400	0.00546	0.764696	0.69159	0.000586012	0.0094044	0.000670706
2022-06-18	3.32527e+07	0			0.6	95335.9	676885	2.36094e+08	5213.78	0.764287		0	2022-06-18	0.694394		1	0.00149747	0.000492161	0.00199084	0.140845	1	37903.7	2.35455e+08	0.305606	676885	1.14283	345700	0.00543	0.764423	0.69159	0.000585984	0.00939824	0.000670665
2022-06-19	3.32579e+07	0			0.6	95201.9	675933	2.36131e+08	5204.57	0.764015		0	2022-06-19	0.694503		1	0.00148581	0.000492151	0.00198804	0.140845	1	37833.1	2.35493e+08	0.305497	675933	1.14283	346000	0.0054	0.764151	0.69159	0.000585956	0.0093921	0.000670623
2022-06-20	3.32631e+07	0			0.6	95068.7	674988	2.36168e+08	5195.4	0.763743		0	2022-06-20	0.694611		1	0.00147421	0.000492141	0.00198526	0.140845	1	37763	2.35531e+08	0.305389	674988	1.14283	346300	0.00537	0.763879	0.69159	0.000585928	0.00938598	0.00067058
2022-06-21	3.32683e+07	0			0.6	94936.2	674047	2.36205e+08	5186.29	0.763472		0	2022-06-21	0.69472		1	0.00146266	0.000492131	0.00198249	0.140845	1	37693.2	2.35568e+08	0.30528	674047	1.14283	346600	0.00534	0.763607	0.69159	0.0005859	0.00937988	0.000670538
2022-06-22	3.32734e+07	0			0.6	94804.5	673112	2.36241e+08	5177.22	0.763201		0	2022-06-22	0.694828		1	0.00145117	0.000492122	0.00197974	0.140845	1	37623.9	2.35606e+08	0.305172	673112	1.14283	346900	0.00531	0.763336	0.69159	0.000585872	0.0093738	0.000670495
2022-06-23	3.32786e+07	0			0.6	94673.6	672183	2.36278e+08	5168.21	0.762931		0	2022-06-23	0.694936		1	0.00143974	0.000492112	0.00197701	0.140845	1	37555	2.35644e+08	0.305064	672183	1.14283	347200	0.00528	0.763066	0.69159	0.000585844	0.00936774	0.000670451
2022-06-24	3.32838e+07	0			0.6	94543.4	671258	2.36315e+08	5159.24	0.762661		0	2022-06-24	0.695043		1	0.00142835	0.000492102	0.00197429	0.140845	1	37486.5	2.35681e+08	0.304957	671258	1.14283	347500	0.00525	0.762796	0.69159	0.000585816	0.0093617	0.000670408
2022-06-25	3.32889e+07	0			0.6	94413.9	670339	2.36351e+08	5150.32	0.762391		0	2022-06-25	0.695151		1	0.00141702	0.000492093	0.00197159	0.140845	1	37418.4	2.35718e+08	0.304849	670339	1.14283	347800	0.00522	0.762526	0.69159	0.000585788	0.00935568	0.000670364
2022-06-26	3.32941e+07	0			0.6	94285.2	669425	2.36388e+08	5141.46	0.762123		0	2022-06-26	0.695258		1	0.00140575	0.000492083	0.0019689	0.140845	1	37350.7	2.35756e+08	0.304742	669425	1.14283	348100	0.00519	0.762257	0.69159	0.00058576	0.00934969	0.00067032
2022-06-27	3.32992e+07	0			0.6	94157.2	668516	2.36424e+08	5132.63	0.761854		0	2022-06-27	0.695366		1	0.00139452	0.000492073	0.00196622	0.140845	1	37283.3	2.35793e+08	0.304634	668516	1.14283	348400	0.00516	0.761988	0.69159	0.000585732	0.00934371	0.000670276
2022-06-28	3.33043e+07	0			0.6	94029.9	667612	2.36461e+08	5123.86	0.761586		0	2022-06-28	0.695473		1	0.00138335	0.000492063	0.00196356	0.140845	1	37216.4	2.3583e+08	0.304527	667612	1.14283	348700	0.00513	0.76172	0.69159	0.000585705	0.00933775	0.000670232
2022-06-29	3.33094e+07	0			0.6	93903.3	666713	2.36497e+08	5115.13	0.761319		0	2022-06-29	0.695579		1	0.00137223	0.000492054	0.00196092	0.140845	1	37149.8	2.35867e+08	0.304421	666713	1.14283	349000	0.0051	0.761452	0.69159	0.000585677	0.00933182	0.000670188
2022-06-30	3.33145e+07	0			0.6	93777.3	665819	2.36533e+08	5106.45	0.761052		0	2022-06-30	0.695686		1	0.00136115	0.000492044	0.00195829	0.140845	1	37083.7	2.35905e+08	0.304314	665819	1.14283	349300	0.00507	0.761185	0.69159	0.000585649	0.0093259	0.000670143
2022-07-01	3.33196e+07	0			0.6	93652.1	664930	2.36569e+08	5097.81	0.760785		0	2022-07-01	0.695792		1	0.00135013	0.000492034	0.00195568	0.140845	1	37017.9	2.35942e+08	0.304208	664930	1.14283	349600	0.00504	0.760918	0.69159	0.000585621	0.00932001	0.000670099
2022-07-02	3.33247e+07	0			0.6	93527.5	664045	2.36606e+08	5089.22	0.760519		0	2022-07-02	0.695899		1	0.00133916	0.000492025	0.00195307	0.140845	1	36952.4	2.35978e+08	0.304101	664045	1.14283	349900	0.00501	0.760652	0.69159	0.000585593	0.0092548	0.000667184
2022-07-03	3.33298e+07	0			0.6	93403.6	663166	2.36642e+08	5080.68	0.760253		0	2022-07-03	0.696005		1	0.00132824	0.000492015	0.00195049	0.140845	1	36887.3	2.36015e+08	0.303995	663166	1.14283	350200	0.00498	0.760386	0.69159	0.000585565	0.009189	0.000664209
2022-07-04	3.33349e+07	0			0.6	93280.4	662291	2.36678e+08	5072.17	0.759988		0	2022-07-04	0.696111		1	0.00131737	0.000492005	0.00194791	0.140845	1	36822.6	2.36052e+08	0.303889	662291	1.14283	350500	0.00495	0.760121	0.69159	0.000585538	0.00912266	0.000661171
2022-07-05	3.33399e+07	0			0.6	93157.8	661421	2.36714e+08	5063.71	0.759723		0	2022-07-05	0.696216		1	0.00130655	0.000491996	0.00194535	0.140845	1	36758.3	2.36089e+08	0.303784	661421	1.14283	350800	0.00492	0.759856	0.69159	0.00058551	0.00905578	0.00065807
2022-07-06	3.3345e+07	0			0.6	93035.9	660555	2.36749e+08	5055.3	0.759459		0	2022-07-06	0.696322		1	0.00129577	0.000491986	0.00194281	0.140845	1	36694.3	2.36126e+08	0.303678	660555	1.14283	351100	0.00489	0.759591	0.69159	0.000585482	0.00898836	0.000654904
2022-07-07	3.335e+07	0			0.6	92914.6	659694	2.36785e+08	5046.92	0.759195		0	2022-07-07	0.696427		1	0.00128505	0.000491976	0.00194028	0.140845	1	36630.6	2.36162e+08	0.303573	659694	1.14283	351400	0.00486	0.759327	0.69159	0.000585454	0.00897972	0.000654543
2022-07-08	3.33551e+07	0			0.6	92794	658837	2.36821e+08	5038.59	0.758931		0	2022-07-08	0.696533		1	0.00127437	0.000491967	0.00193776	0.140845	1	36567.3	2.36199e+08	0.303467	658837	1.14283	351700	0.00483	0.759063	0.69159	0.000585426	0.0089118	0.000651304
2022-07-09	3.33601e+07	0			0.6	92674	657985	2.36857e+08	5030.3	0.758668		0	2022-07-09	0.696638		1	0.00126374	0.000491957	0.00193525	0.140845	1	36504.3	2.36235e+08	0.303362	657985	1.14283	352000	0.0048	0.7588	0.69159	0.000585399	0.00884326	0.000647999
2022-07-10	3.33651e+07	0			0.6	92554.6	657137	2.36892e+08	5022.06	0.758406		0	2022-07-10	0.696743		1	0.00125315	0.000491947	0.00193276	0.140845	1	36441.7	2.36272e+08	0.303257	657137	1.14283	352300	0.00477	0.758537	0.69159	0.000585371	0.00877415	0.000644624
2022-07-11	3.33702e+07	0			0.6	92435.8	656294	2.36928e+08	5013.85	0.758144		0	2022-07-11	0.696847		1	0.00124261	0.000491937	0.00193028	0.140845	1	36379.4	2.36308e+08	0.303153	656294	1.14283	352600	0.00474	0.758275	0.69159	0.000585343	0.00870448	0.000641178
2022-07-12	3.33752e+07	0			0.6	92317.6	655455	2.36964e+08	5005.69	0.757882		0	2022-07-12	0.696952		1	0.00123212	0.000491928	0.00192781	0.140845	1	36317.4	2.36344e+08	0.303048	655455	1.14283	352900	0.00471	0.758013	0.69159	0.000585315	0.00863423	0.000637661
2022-07-13	3.33802e+07	0			0.6	92200	654620	2.36999e+08	4997.56	0.75762		0	2022-07-13	0.697056		1	0.00122168	0.000491918	0.00192535	0.140845	1	36255.8	2.36381e+08	0.302944	654620	1.14283	353200	0.00468	0.757751	0.69159	0.000585287	0.00856341	0.00063407
2022-07-14	3.33851e+07	0			0.6	92083.1	653790	2.37035e+08	4989.47	0.75736		0	2022-07-14	0.69716		1	0.00121128	0.000491908	0.00192291	0.140845	1	36194.5	2.36417e+08	0.30284	653790	1.14283	353500	0.00465	0.75749	0.69159	0.00058526	0.00849199	0.000630405
2022-07-15	3.33901e+07	0			0.6	91966.7	652963	2.3707e+08	4981.43	0.757099		0	2022-07-15	0.697264		1	0.00120092	0.000491899	0.00192048	0.140845	1	36133.5	2.36453e+08	0.302736	652963	1.14283	353800	0.00462	0.757229	0.69159	0.000585232	0.00841999	0.000626663
2022-07-16	3.33951e+07	0			0.6	91850.9	652141	2.37105e+08	4973.42	0.756839		0	2022-07-16	0.697368		1	0.00119061	0.000491889	0.00191806	0.140845	1	36072.8	2.36489e+08	0.302632	652141	1.14283	354100	0.00459	0.756969	0.69159	0.000585204	0.00834738	0.000622842
2022-07-17	3.34001e+07	0			0.6	91735.6	651323	2.3714e+08	4965.45	0.756579		0	2022-07-17	0.697472		1	0.00118035	0.000491879	0.00191566	0.140845	1	36012.4	2.36525e+08	0.302528	651323	1.14283	354400	0.00456	0.756709	0.69159	0.000585176	0.00833425	0.000621874
2022-07-18	3.3405e+07	0			0.6	91621	650509	2.37176e+08	4957.52	0.75632		0	2022-07-18	0.697575		1	0.00117012	0.00049187	0.00191326	0.140845	1	35952.4	2.36561e+08	0.302425	650509	1.14283	354700	0.00453	0.75645	0.69159	0.000585149	0.00832187	0.000620949
2022-07-19	3.341e+07	0			0.6	91506.9	649699	2.37211e+08	4949.63	0.756061		0	2022-07-19	0.697679		1	0.00115995	0.00049186	0.00191088	0.140845	1	35892.6	2.36597e+08	0.302321	649699	1.14283	355000	0.0045	0.756191	0.69159	0.000585121	0.00831021	0.000620069
2022-07-20	3.34149e+07	0			0.6	91393.4	648893	2.37246e+08	4941.77	0.755803		0	2022-07-20	0.697782		1	0.00114981	0.00049185	0.00190851	0.140845	1	35833.2	2.36633e+08	0.302218	648893	1.14283	355300	0.00447	0.755932	0.69159	0.000585093	0.00829927	0.000619237
2022-07-21	3.34198e+07	0			0.6	91280.4	648091	2.37281e+08	4933.96	0.755545		0	2022-07-21	0.697885		1	0.00113972	0.000491841	0.00190615	0.140845	1	35774	2.36669e+08	0.302115	648091	1.14283	355600	0.00444	0.755674	0.69159	0.000585066	0.00828906	0.000618455
2022-07-22	3.34248e+07	0			0.6	91168	647293	2.37316e+08	4926.18	0.755287		0	2022-07-22	0.697988		1	0.00112967	0.000491831	0.0019038	0.140845	1	35715.2	2.36704e+08	0.302012	647293	1.14283	355900	0.00441	0.755416	0.69159	0.000585038	0.00827887	0.000617665
2022-07-23	3.34297e+07	0			0.6	91056.1	646499	2.37351e+08	4918.43	0.75503		0	2022-07-23	0.698091		1	0.00111967	0.000491821	0.00190147	0.140845	1	35656.6	2.3674e+08	0.301909	646499	1.14283	356200	0.00438	0.755159	0.69159	0.00058501	0.00826942	0.000616927
2022-07-24	3.34346e+07	0			0.6	90944.8	645708	2.37386e+08	4910.72	0.754773		0	2022-07-24	0.698193		1	0.00110971	0.000491812	0.00189914	0.140845	1	35598.3	2.36776e+08	0.301807	645708	1.14283	356500	0.00435	0.754902	0.69159	0.000584982	0.00826073	0.000616244
2022-07-25	3.34395e+07	0			0.6	90834	644921	2.3742e+08	4903.05	0.754517		0	2022-07-25	0.698296		1	0.00109978	0.000491802	0.00189683	0.140845	1	35540.4	2.36811e+08	0.301704	644921	1.14283	356800	0.00432	0.754645	0.69159	0.000584955	0.00825283	0.000615619
2022-07-26	3.34444e+07	0			0.6	90723.7	644138	2.37455e+08	4895.41	0.754261		0	2022-07-26	0.698398		1	0.0010899	0.000491792	0.00189452	0.140845	1	35482.7	2.36847e+08	0.301602	644138	1.14283	357100	0.00429	0.754389	0.69159	0.000584927	0.00824571	0.000615055
2022-07-27	3.34493e+07	0			0.6	90614	643359	2.3749e+08	4887.81	0.754006		0	2022-07-27	0.6985		1	0.00108007	0.000491783	0.00189223	0.140845	1	35425.3	2.36882e+08	0.3015	643359	1.14283	357400	0.00426	0.754133	0.69159	0.000584899	0.0082394	0.000614554
2022-07-28	3.34542e+07	0			0.6	90504.8	642584	2.37525e+08	4880.25	0.75375		0	2022-07-28	0.698602		1	0.00107027	0.000491773	0.00188995	0.140845	1	35368.1	2.36917e+08	0.301398	642584	1.14283	357700	0.00423	0.753878	0.69159	0.000584872	0.00823392	0.000614119
2022-07-29	3.3459e+07	0			0.6	90396	641812	2.37559e+08	4872.71	0.753496		0	2022-07-29	0.698704		1	0.00106051	0.000491763	0.00188768	0.140845	1	35311.3	2.36953e+08	0.301296	641812	1.14283	358000	0.0042	0.753623	0.69159	0.000584844	0.00822927	0.000613753
2022-07-30	3.34639e+07	0			0.6	90287.8	641044	2.37594e+08	4865.22	0.753241		0	2022-07-30	0.698805		1	0.0010508	0.000491754	0.00188542	0.140845	1	35254.7	2.36988e+08	0.301195	641044	1.14283	358300	0.00417	0.753368	0.69159	0.000584816	0.00822547	0.00061346
2022-07-31	3.34688e+07	0			0.6	90180.1	640279	2.37628e+08	4857.75	0.752987		0	2022-07-31	0.698907		1	0.00104112	0.000491744	0.00188317	0.140845	1	35198.4	2.37023e+08	0.301093	640279	1.14283	358600	0.00414	0.753114	0.69159	0.000584789	0.00822253	0.000613242
2022-08-01	3.34736e+07	0			0.6	90072.9	639518	2.37663e+08	4850.32	0.752734		0	2022-08-01	0.699008		1	0.00103148	0.000491734	0.00188093	0.140845	1	35142.4	2.37058e+08	0.300992	639518	1.14283	358900	0.00411	0.75286	0.69159	0.000584761	0.00821973	0.000613041
2022-08-02	3.34785e+07	0			0.6	89966.2	638760	2.37697e+08	4842.92	0.75248		0	2022-08-02	0.699109		1	0.00102189	0.000491725	0.00187871	0.140845	1	35086.6	2.37093e+08	0.300891	638760	1.14283	359200	0.00408	0.752607	0.69159	0.000584734	0.00821706	0.000612855
2022-08-03	3.34833e+07	0			0.6	89860	638006	2.37731e+08	4835.56	0.752228		0	2022-08-03	0.69921		1	0.00101233	0.000491715	0.00187649	0.140845	1	35031.1	2.37128e+08	0.30079	638006	1.14283	359500	0.00405	0.752354	0.69159	0.000584706	0.0082145	0.000612684
2022-08-04	3.34881e+07	0			0.6	89754.3	637255	2.37766e+08	4828.23	0.751975		0	2022-08-04	0.699311		1	0.00100281	0.000491705	0.00187428	0.140845	1	34975.9	2.37163e+08	0.300689	637255	1.14283	359800	0.00402	0.752101	0.69159	0.000584678	0.00821205	0.000612527
2022-08-05	3.34929e+07	0			0.6	89649	636508	2.378e+08	4820.93	0.751723		0	2022-08-05	0.699411		1	0.000993334	0.000491696	0.00187208	0.140845	1	34920.9	2.37198e+08	0.300589	636508	1.14283	360100	0.00399	0.751849	0.69159	0.000584651	0.0082097	0.000612383
2022-08-06	3.34978e+07	0			0.6	89544.3	635764	2.37834e+08	4813.66	0.751471		0	2022-08-06	0.699512		1	0.000983894	0.000491686	0.00186989	0.140845	1	34866.1	2.37233e+08	0.300488	635764	1.14283	360400	0.00396	0.751597	0.69159	0.000584623	0.00820745	0.000612253
2022-08-07	3.35026e+07	0			0.6	89440	635024	2.37868e+08	4806.43	0.75122		0	2022-08-07	0.699612		1	0.000974491	0.000491677	0.00186772	0.140845	1	34811.7	2.37268e+08	0.300388	635024	1.14283	360700	0.00393	0.751346	0.69159	0.000584596	0.00820529	0.000612137
2022-08-08	3.35074e+07	0			0.6	89336.1	634287	2.37902e+08	4799.22	0.750969		0	2022-08-08	0.699713		1	0.000965127	0.000491667	0.00186555	0.140845	1	34757.4	2.37303e+08	0.300287	634287	1.14283	361000	0.0039	0.751095	0.69159	0.000584568	0.00820322	0.000612032
2022-08-09	3.35122e+07	0			0.6	89232.8	633553	2.37936e+08	4792.05	0.750719		0	2022-08-09	0.699813		1	0.000955801	0.000491657	0.00186339	0.140845	1	34703.5	2.37337e+08	0.300187	633553	1.14283	361300	0.00387	0.750844	0.69159	0.00058454	0.00820123	0.000611939
2022-08-10	3.35169e+07	0			0.6	89129.9	632822	2.3797e+08	4784.91	0.750468		0	2022-08-10	0.699913		1	0.000946512	0.000491648	0.00186124	0.140845	1	34649.7	2.37372e+08	0.300087	632822	1.14283	361600	0.00384	0.750594	0.69159	0.000584513	0.0081993	0.000611855
2022-08-11	3.35217e+07	0			0.6	89027.4	632095	2.38004e+08	4777.8	0.750219		0	2022-08-11	0.700012		1	0.00093726	0.000491638	0.0018591	0.140845	1	34596.3	2.37407e+08	0.299988	632095	1.14283	361900	0.00381	0.750344	0.69159	0.000584485	0.00819742	0.000611781
2022-08-12	3.35265e+07	0			0.6	88925.4	631370	2.38038e+08	4770.72	0.749969		0	2022-08-12	0.700112		1	0.000928045	0.000491628	0.00185697	0.140845	1	34543	2.37441e+08	0.299888	631370	1.14283	362200	0.00378	0.750094	0.69159	0.000584458	0.0081956	0.000611714
2022-08-13	3.35313e+07	0			0.6	88823.9	630649	2.38072e+08	4763.67	0.74972		0	2022-08-13	0.700211		1	0.000918868	0.000491619	0.00185485	0.140845	1	34490	2.37476e+08	0.299789	630649	1.14283	362500	0.00375	0.749845	0.69159	0.00058443	0.00819381	0.000611654
2022-08-14	3.3536e+07	0			0.6	88722.8	629932	2.38106e+08	4756.65	0.749471		0	2022-08-14	0.700311		1	0.000909726	0.000491609	0.00185274	0.140845	1	34437.3	2.3751e+08	0.299689	629932	1.14283	362800	0.00372	0.749596	0.69159	0.000584403	0.00819205	0.000611599
2022-08-15	3.35408e+07	0			0.6	88622.1	629217	2.38139e+08	4749.66	0.749223		0	2022-08-15	0.70041		1	0.000900621	0.000491599	0.00185064	0.140845	1	34384.8	2.37545e+08	0.29959	629217	1.14283	363100	0.00369	0.749347	0.69159	0.000584375	0.0081903	0.000611547
2022-08-16	3.35455e+07	0			0.6	88521.9	628505	2.38173e+08	4742.69	0.748975		0	2022-08-16	0.700509		1	0.000891552	0.00049159	0.00184854	0.140845	1	34332.5	2.37579e+08	0.299491	628505	1.14283	363400	0.00366	0.749099	0.69159	0.000584348	0.00818857	0.000611498
2022-08-17	3.35502e+07	0			0.6	88422.1	627797	2.38207e+08	4735.76	0.748728		0	2022-08-17	0.700608		1	0.000882519	0.00049158	0.00184646	0.140845	1	34280.4	2.37613e+08	0.299392	627797	1.14283	363700	0.00363	0.748851	0.69159	0.00058432	0.00818686	0.000611453
2022-08-18	3.3555e+07	0			0.6	88322.7	627091	2.3824e+08	4728.86	0.74848		0	2022-08-18	0.700707		1	0.000873521	0.00049157	0.00184439	0.140845	1	34228.6	2.37647e+08	0.299293	627091	1.14283	364000	0.0036	0.748604	0.69159	0.000584292	0.00818515	0.00061141
2022-08-19	3.35597e+07	0			0.6	88223.8	626389	2.38274e+08	4721.99	0.748233		0	2022-08-19	0.700805		1	0.000864559	0.000491561	0.00184232	0.140845	1	34177	2.37682e+08	0.299195	626389	1.14283	364300	0.00357	0.748357	0.69159	0.000584265	0.00818346	0.000611369
2022-08-20	3.35644e+07	0			0.6	88125.2	625689	2.38307e+08	4715.14	0.747987		0	2022-08-20	0.700904		1	0.000855632	0.000491551	0.00184026	0.140845	1	34125.6	2.37716e+08	0.299096	625689	1.14283	364600	0.00354	0.74811	0.69159	0.000584237	0.00818178	0.000611331
2022-08-21	3.35691e+07	0			0.6	88027.1	624993	2.38341e+08	4708.32	0.747741		0	2022-08-21	0.701002		1	0.00084674	0.000491542	0.00183821	0.140845	1	34074.5	2.3775e+08	0.298998	624993	1.14283	364900	0.00351	0.747864	0.69159	0.00058421	0.00818011	0.000611295
2022-08-22	3.35738e+07	0			0.6	87929.5	624299	2.38374e+08	4701.53	0.747495		0	2022-08-22	0.7011		1	0.000837882	0.000491532	0.00183617	0.140845	1	34023.5	2.37784e+08	0.2989	624299	1.14283	365200	0.00348	0.747618	0.69159	0.000584182	0.00817845	0.00061126
2022-08-23	3.35785e+07	0			0.6	87832.2	623608	2.38407e+08	4694.77	0.74725		0	2022-08-23	0.701198		1	0.000829059	0.000491522	0.00183414	0.140845	1	33972.8	2.37818e+08	0.298802	623608	1.14283	365500	0.00345	0.747372	0.69159	0.000584155	0.00817679	0.000611227
2022-08-24	3.35832e+07	0			0.6	87735.3	622921	2.38441e+08	4688.04	0.747004		0	2022-08-24	0.701296		1	0.00082027	0.000491513	0.00183212	0.140845	1	33922.4	2.37852e+08	0.298704	622921	1.14283	365800	0.00342	0.747127	0.69159	0.000584127	0.00817514	0.000611195
2022-08-25	3.35879e+07	0			0.6	87638.8	622236	2.38474e+08	4681.33	0.74676		0	2022-08-25	0.701394		1	0.000811515	0.000491503	0.00183011	0.140845	1	33872.1	2.37886e+08	0.298606	622236	1.14283	366100	0.00339	0.746882	0.69159	0.0005841	0.0081735	0.000611164
2022-08-26	3.35926e+07	0			0.6	87542.8	621554	2.38507e+08	4674.65	0.746515		0	2022-08-26	0.701491		1	0.000802794	0.000491494	0.0018281	0.140845	1	33822	2.37919e+08	0.298509	621554	1.14283	366400	0.00336	0.746638	0.69159	0.000584073	0.00817186	0.000611135
2022-08-27	3.35972e+07	0			0.6	87447.1	620875	2.3854e+08	4668	0.746271		0	2022-08-27	0.701589		1	0.000794107	0.000491484	0.0018261	0.140845	1	33772.2	2.37953e+08	0.298411	620875	1.14283	366700	0.00333	0.746393	0.69159	0.000584045	0.00817022	0.000611106
2022-08-28	3.36019e+07	0			0.6	87351.9	620198	2.38573e+08	4661.38	0.746028		0	2022-08-28	0.701686		1	0.000785453	0.000491474	0.00182411	0.140845	1	33722.6	2.37987e+08	0.298314	620198	1.14283	367000	0.0033	0.746149	0.69159	0.000584018	0.00816859	0.000611077
2022-08-29	3.36065e+07	0			0.6	87257	619525	2.38606e+08	4654.78	0.745784		0	2022-08-29	0.701784		1	0.000776832	0.000491465	0.00182213	0.140845	1	33673.1	2.38021e+08	0.298216	619525	1.14283	367300	0.00327	0.745906	0.69159	0.00058399	0.00816696	0.000611049
2022-08-30	3.36112e+07	0			0.6	87162.5	618854	2.38639e+08	4648.21	0.745541		0	2022-08-30	0.701881		1	0.000768244	0.000491455	0.00182016	0.140845	1	33623.9	2.38054e+08	0.298119	618854	1.14283	367600	0.00324	0.745663	0.69159	0.000583963	0.00816534	0.000611022
2022-08-31	3.36158e+07	0			0.6	87068.4	618186	2.38672e+08	4641.66	0.745299		0	2022-08-31	0.701978		1	0.000759689	0.000491445	0.00181819	0.140845	1	33574.9	2.38088e+08	0.298022	618186	1.14283	367900	0.00321	0.74542	0.69159	0.000583935	0.00816372	0.000610996
2022-09-01	3.36205e+07	0			0.6	86974.7	617520	2.38705e+08	4635.14	0.745056		0	2022-09-01	0.702074		1	0.000751166	0.000491436	0.00181624	0.140845	1	33526.1	2.38121e+08	0.297926	617520	1.14283	368200	0.00318	0.745177	0.69159	0.000583908	0.0081621	0.000610969
2022-09-02	3.36251e+07	0			0.6	86881.3	616857	2.38738e+08	4628.64	0.744814		0	2022-09-02	0.702171		1	0.000742676	0.000491426	0.00181429	0.140845	1	33477.5	2.38155e+08	0.297829	616857	1.14283	368500	0.00315	0.744935	0.69159	0.00058388	0.00816049	0.000610943

## Sheet: World
Date of Unlock ->	2020-12-01	2021-06-15	2023-08-01	2021-11-01	2022-02-01	2022-04-15	0-main region, 1-subregion, 2-without sub	Use Daily Partial Unlock->1	UNLOCK ALL->1	Initial & Unlocked R0	Use proportional vent. alloc.	Initial Known Cases on Vent.	Days on vent and days spreading	Vents per capita	Vents avail for current region	Vents main region	Vents subregion (if not auto alloc)	Pre-Peak Vent. Util. Target	MWFSa or late Vent. Util. Target	TTSu Vent. Util. Target	Total / Known case ratio	Population	Population main region	Population subregion (e.g. NY St.)	Name of main region	Name of sub-region	Ventil mfg rate/day	Change per day in crit cases on vent
Effective-ness->	0.1	0.6	RE- LOCK	0.7	0.83	0.9	0	1	0	2.5	0	0.03	14	9.33333e-05	500000	500000	200000	0.22	0.65	0.65	7.1	7500000000	7500000000	340000000	World	US	1000	3e-05
Date	Predicted Known cases	World known cases	World known cases	US known cases	Target Vent. Util.	Known Active Cases	Total Active Cases	Total cum. cases	Total New Known cases	Replication Rate (R0)	Unlock this day of the week on:	Lock-down ON/OFF		World cases	historical active cases	unlock (%)	Ventilator Utilization	predicted active cases as of 3/21	predicted active cases	fraction of cases known	potential unlock effectiveness	Total Newly Cured	cum not spreading	susceptibility	Total recup-erating	last actual R0	current # ventils	current % known cases on vent	last unlocked R0	last locked R0	US pred	NY pred	US excl NY pred				date
2020-03-21	24000	305106	305106	24000	0	24000	170400	170400	9280	2.5	2023-01-01	0	2020-03-21	2.272e-05	2.272e-05	0.6	0.00144	0.000423529	2.272e-05	0.140845	0.6	0	0	0.999977	170400	2.5	500000	0.03	2.5	2.5	0.00045	0.0072	0.00045					delta-cases
2020-03-22	56480	337586	337586	32821	0	56480	401008	401008	32480	2.13394	2023-01-01	1	2020-03-22	5.34677e-05	5.34677e-05	0	0.00337865	0.00049916	5.34677e-05	0.140845	0	0	0	0.999947	401008	2.13399	501000	0.02997	2.31697	2.13394	0.000615394	0.0086436	0.000525169				2020-03-22	32480
2020-03-23	97973	379079	379079	43600	0	97973	695608	695608	41493	1.8351	2023-01-01	1	2020-03-23	9.27478e-05	9.27478e-05	0	0.00584325	0.000588258	9.27478e-05	0.140845	0	0	0	0.999907	695608	1.8352	502000	0.02994	1.98452	1.8351	0.0008175	0.0103557	0.000620269				2020-03-23	41493
2020-03-24	141808	422914	422914	53870	0	141808	1.00684e+06	1.00684e+06	43835	1.60952	2023-01-01	1	2020-03-24	0.000134245	0.000134245	0	0.00843236	0.000693251	0.000134245	0.140845	0	0	0	0.999866	1.00684e+06	1.60967	503000	0.02991	1.72231	1.60952	0.00101006	0.0117927	0.000723019				2020-03-24	43835
2020-03-25	190365	471471	471471	67857	0	190365	1.35159e+06	1.35159e+06	48557	1.50296	2023-01-01	1	2020-03-25	0.000180212	0.000180212	0	0.0112859	0.000816973	0.000180212	0.140845	0	0	0	0.99982	1.35159e+06	1.50316	504000	0.02988	1.55624	1.50296	0.00127232	0.0133365	0.000888787				2020-03-25	48557
2020-03-26	251359	532465	532465	84773	0	251359	1.78465e+06	1.78465e+06	60994	1.47848	2023-01-01	1	2020-03-26	0.000237953	0.000237953	0	0.0148576	0.00096276	0.000237953	0.140845	0	0	0	0.999762	1.78465e+06	1.47874	505000	0.02985	1.49072	1.47848	0.00154224	0.0148581	0.0010636				2020-03-26	60994
2020-03-27	315912	597018	597018	102738	0	315912	2.24298e+06	2.24298e+06	64553	1.40292	2023-01-01	1	2020-03-27	0.000299063	0.000299063	0	0.0186176	0.00113454	0.000299063	0.140845	0	0	0	0.999701	2.24298e+06	1.40325	506000	0.02982	1.4407	1.40292	0.00176094	0.0160401	0.00120844				2020-03-27	64553
2020-03-28	382673	663779	663779	122070	0	382673	2.71698e+06	2.71698e+06	66761	1.344		1	2020-03-28	0.000362264	0.000362264	0	0.0224849	0.00133694	0.000362264	0.140845	0	0	0	0.999638	2.71698e+06	1.34441	507000	0.02979	1.37346	1.344	0.00208671	0.0180765	0.00140693				2020-03-28	66761
2020-03-29	442936	724042	724042	140321	0	442936	3.14485e+06	3.14485e+06	60263	1.26827		1	2020-03-29	0.000419313	0.000419313	0	0.0259484	0.00157541	0.000419313	0.140845	0	0	0	0.999581	3.14485e+06	1.26873	508000	0.02976	1.30614	1.26827	0.00243846	0.0205101	0.00160658				2020-03-29	60263
2020-03-30	504722	785828	785828	162417	0	504722	3.58353e+06	3.58353e+06	61786	1.24138		1	2020-03-30	0.000477803	0.000477803	0	0.0294801	0.00185636	0.000477803	0.140845	0	0	0	0.999522	3.58353e+06	1.2419	509000	0.02973	1.25483	1.24138	0.00278306	0.0224985	0.00182691				2020-03-30	61786
2020-03-31	578514	859620	859620	187500	0	578514	4.10745e+06	4.10745e+06	73792	1.25152		1	2020-03-31	0.00054766	0.00054766	0	0.0336899	0.00218733	0.00054766	0.140845	0	0	0	0.999452	4.10745e+06	1.25211	510000	0.0297	1.24645	1.25152	0.00319845	0.0248976	0.00209235				2020-03-31	73792
2020-04-01	655531	936637	936637	214465	0	655531	4.65427e+06	4.65427e+06	77017	1.23167		1	2020-04-01	0.000620569	0.000620569	0	0.0380618	0.0025772	0.000620569	0.140845	0	0	0	0.999379	4.65427e+06	1.23234	511000	0.02967	1.24159	1.23167	0.00372172	0.0277316	0.00243005				2020-04-01	77017
2020-04-02	735628	1016734	1016734	244000	0	735628	5.22296e+06	5.22296e+06	80097	1.2147		1	2020-04-02	0.000696395	0.000696395	0	0.042586	0.00303641	0.000696395	0.140845	0	0	0	0.999304	5.22296e+06	1.21545	512000	0.02964	1.22318	1.2147	0.00432258	0.0311041	0.00280046				2020-04-02	80097
2020-04-03	837308	1118414	1118414	276000	0	837308	5.94489e+06	5.94489e+06	101680	1.23945		1	2020-04-03	0.000792652	0.000792652	0	0.0483288	0.00357722	0.000792652	0.140845	0	65888	65888	0.999207	5.94489e+06	1.24032	513000	0.02961	1.22708	1.23945	0.00506565	0.0351032	0.00325968				2020-04-03	101680
2020-04-04	922129	1203235	1203235	310500	0	912849	6.48123e+06	6.54712e+06	84821	1.18322		1	2020-04-04	0.000872949	0.000864164	0	0.0525332	0.00419247	0.000864164	0.140845	0	230608	296496	0.999127	6.48123e+06	1.18416	514000	0.02958	1.21134	1.18322	0.00582735	0.0394481	0.00369804				2020-04-04	84821
2020-04-05	993547	1274653	1274653	336327	0	951787	6.75769e+06	7.05418e+06	71418	1.14796		1	2020-04-05	0.000940558	0.000901025	0	0.0546122	0.00486281	0.000901025	0.140845	0	294600	591096	0.999059	6.75769e+06	1.14896	515000	0.02955	1.16559	1.14796	0.00667846	0.0430488	0.00425124				2020-04-05	71418
2020-04-06	1067458	1348564	1348564	364028	0	984205	6.98786e+06	7.57895e+06	73911	1.14808		1	2020-04-06	0.00101053	0.000931714	0	0.0563057	0.00563841	0.000931714	0.140845	0	311228	902325	0.998989	6.98786e+06	1.14916	516000	0.02952	1.14802	1.14808	0.00751546	0.0463399	0.00479501				2020-04-06	73911
2020-04-07	1152532	1433638	1433638	395000	0	1025444	7.28065e+06	8.18298e+06	85074	1.16359		1	2020-04-07	0.00109106	0.000970754	0	0.058492	0.00653529	0.000970754	0.140845	0	344755	1.24708e+06	0.998909	7.28065e+06	1.16477	517000	0.02949	1.15583	1.16359	0.00843804	0.0496895	0.00539616				2020-04-07	85074
2020-04-08	1236917	1518023	1518023	426659	0	1061272	7.53503e+06	8.78211e+06	84385	1.15679		1	2020-04-08	0.00117095	0.00100467	0	0.0603573	0.00757178	0.00100467	0.140845	0	433057	1.68014e+06	0.998829	7.53503e+06	1.15805	518000	0.02946	1.16019	1.15679	0.00951214	0.0536966	0.00607706				2020-04-08	84385
2020-04-09	1319773	1600879	1600879	466546	0	1.08313e+06	7.69025e+06	9.37039e+06	82856	1.15084		1	2020-04-09	0.00124939	0.00102537	0	0.0614193	0.00876887	0.00102537	0.140845	0	458326	2.13846e+06	0.998751	7.69025e+06	1.15219	519000	0.02943	1.15381	1.15084	0.0106691	0.0580041	0.00678576				2020-04-09	82856
2020-04-10	1418894	1700000	1700000	502000	0	1.1177e+06	7.93568e+06	1.00741e+07	99121	1.17487		1	2020-04-10	0.00134322	0.00105809	0	0.0631932	0.0101505	0.00105809	0.140845	0	474003	2.61247e+06	0.998657	7.93568e+06	1.17634	520000	0.0294	1.16285	1.17487	0.0119453	0.06237	0.00756662				2020-04-10	99121
2020-04-11	1495048	1776154	1776154	531257	0	1.12709e+06	8.00237e+06	1.06148e+07	76154	1.13323		1	2020-04-11	0.00141531	0.00106698	0	0.063537	0.0117437	0.00106698	0.140845	0	427867	3.04033e+06	0.998585	8.00237e+06	1.13475	521000	0.02937	1.15405	1.13323	0.0134098	0.0669861	0.00846725				2020-04-11	76154
2020-04-12	1.58628e+06	0			0	1.15806e+06	8.22226e+06	1.12626e+07	91232.7	1.13315		1	2020-04-12	0.00150168		0	0.0650912	0.0135795	0.0010963	0.140845	0	438681	3.47901e+06	0.998498	8.22226e+06	1.13475	522000	0.02934	1.13319	1.13315	0.015071	0.0719908	0.00947971				2020-04-12	-1776154
2020-04-13	1.68001e+06	0			0.22	1.19001e+06	8.44908e+06	1.19281e+07	93732.8	1.13305		1	2020-04-13	0.00159041		0	0.0666907	0.0156927	0.00112654	0.140845	0	523923	4.00294e+06	0.99841	8.44908e+06	1.13475	523000	0.02931	1.1331	1.13305	0.0170033	0.0776175	0.0106538				2020-04-13	0
2020-04-14	1.77632e+06	0			0	1.21253e+06	8.60896e+06	1.26119e+07	96310.2	1.13295		1	2020-04-14	0.00168159		0	0.0677536	0.0181227	0.00114786	0.140845	0	546821	4.54976e+06	0.998318	8.60896e+06	1.13475	524000	0.02928	1.133	1.13295	0.0191521	0.0838717	0.0119209				2020-04-14	0
2020-04-15	1.87445e+06	0			0.22	1.23364e+06	8.75882e+06	1.33086e+07	98123.9	1.13285		1	2020-04-15	0.00177448		0	0.0687312	0.0209135	0.00116784	0.140845	0	568689	5.11845e+06	0.998226	8.75882e+06	1.13475	525000	0.02925	1.1329	1.13285	0.0215645	0.0899982	0.0133618				2020-04-15	0
2020-04-16	1.97427e+06	0			0	1.25336e+06	8.89887e+06	1.40173e+07	99822.9	1.13274		1	2020-04-16	0.00186898		0	0.069626	0.0241145	0.00118652	0.140845	0	721928	5.84037e+06	0.998131	8.89887e+06	1.13475	526000	0.02922	1.13279	1.13274	0.0242533	0.0963638	0.0149612				2020-04-16	0
2020-04-17	2.07568e+06	0			0.22	1.25309e+06	8.89695e+06	1.47373e+07	101410	1.13263		1	2020-04-17	0.00196498		0	0.0694075	0.0277805	0.00118626	0.140845	0	602229	6.4426e+06	0.998035	8.89695e+06	1.13475	527000	0.02919	1.13269	1.13263	0.0272453	0.102924	0.0167363				2020-04-17	0
2020-04-18	2.17706e+06	0			0	1.26965e+06	9.01451e+06	1.54571e+07	101378	1.13252		1	2020-04-18	0.00206095		0	0.0701193	0.0319717	0.00120193	0.140845	0	507068	6.94967e+06	0.997939	9.01451e+06	1.13475	528000	0.02916	1.13258	1.13252	0.0305602	0.109611	0.0186983				2020-04-18	0
2020-04-19	2.27977e+06	0			0	1.30094e+06	9.23667e+06	1.61863e+07	102708	1.13242		1	2020-04-19	0.00215818		0	0.0716377	0.0367583	0.00123156	0.140845	0	524768	7.47444e+06	0.997842	9.23667e+06	1.13475	529000	0.02913	1.13247	1.13242	0.0342386	0.116382	0.0208758				2020-04-19	0
2020-04-20	2.38499e+06	0			0.22	1.33226e+06	9.45902e+06	1.69335e+07	105229	1.94968		0	2020-04-20	0.0022578		0.6	0.0731484	0.0422226	0.0012612	0.140845	0.6	604025	8.07847e+06	0.997742	9.45902e+06	1.13475	530000	0.0291	1.54105	1.13242	0.0383151	0.123308	0.0232813				2020-04-20	0
2020-04-21	2.57053e+06	0			0	1.43272e+06	1.01723e+07	1.82508e+07	185534	1.13219		1	2020-04-21	0.00243343		0	0.0784352	0.048449	0.00135631	0.140845	0	599134	8.6776e+06	0.997567	1.01723e+07	1.13475	531000	0.02907	1.54094	1.13219	0.0428433	0.130422	0.0259465				2020-04-21	0
2020-04-22	2.68639e+06	0			0.22	1.4642e+06	1.03958e+07	1.90734e+07	115865	1.94915		0	2020-04-22	0.00254312		0.6	0.0799254	0.0555282	0.00138611	0.140845	0.6	588278	9.26588e+06	0.997457	1.03958e+07	1.13475	532000	0.02904	1.54067	1.13219	0.0478676	0.137715	0.0288975				2020-04-22	0
2020-04-23	2.89025e+06	0			0	1.58519e+06	1.12549e+07	2.05208e+07	203853	1.13187		1	2020-04-23	0.0027361		0	0.0862786	0.063557	0.00150065	0.140845	0	703759	9.96964e+06	0.997264	1.12549e+07	1.13475	533000	0.02901	1.54051	1.13187	0.0534262	0.145107	0.0321598				2020-04-23	0
2020-04-24	3.01841e+06	0			0.22	1.61423e+06	1.1461e+07	2.14307e+07	128159	1.94856		0	2020-04-24	0.00285742		0.6	0.0876038	0.0726368	0.00152814	0.140845	0.6	540693	1.05103e+07	0.997143	1.1461e+07	1.13475	534000	0.02898	1.54021	1.13187	0.0595701	0.152552	0.0357693				2020-04-24	0
2020-04-25	3.24308e+06	0			0	1.76275e+06	1.25155e+07	2.30259e+07	224673	1.13151		1	2020-04-25	0.00307011		0	0.0953862	0.0828717	0.00166874	0.140845	0	647752	1.11581e+07	0.99693	1.25155e+07	1.13475	535000	0.02895	1.54003	1.13151	0.0663487	0.160026	0.0397591				2020-04-25	0
2020-04-26	3.38555e+06	0			0	1.81399e+06	1.28793e+07	2.40374e+07	142470	1.13127		1	2020-04-26	0.00320499		0	0.0978741	0.094366	0.00171724	0.140845	0	665503	1.18236e+07	0.996795	1.28793e+07	1.13475	536000	0.02892	1.13139	1.13127	0.0738032	0.167481	0.0441587				2020-04-26	0
2020-04-27	3.53213e+06	0			0.22	1.86683e+06	1.32545e+07	2.50781e+07	146579	1.94764		0	2020-04-27	0.00334375		0.6	0.100434	0.10722	0.00176727	0.140845	0.6	683802	1.25074e+07	0.996656	1.32545e+07	1.13475	537000	0.02889	1.53945	1.13127	0.0819743	0.17485	0.0490009				2020-04-27	0
2020-04-28	3.79184e+06	0			0	2.03023e+06	1.44147e+07	2.6922e+07	259709	1.13096		1	2020-04-28	0.00358961		0	0.108908	0.121523	0.00192195	0.140845	0	696680	1.32041e+07	0.99641	1.44147e+07	1.13475	538000	0.02886	1.5393	1.13096	0.0908908	0.182038	0.0543138				2020-04-28	0
2020-04-29	3.95584e+06	0			0.22	2.09612e+06	1.48824e+07	2.80865e+07	164008	1.94689		0	2020-04-29	0.00374487		0.6	0.112117	0.137353	0.00198432	0.140845	0.6	708742	1.39128e+07	0.996255	1.48824e+07	1.13475	539000	0.02883	1.53892	1.13096	0.100587	0.188942	0.0601367				2020-04-29	0
2020-04-30	4.24734e+06	0			0	2.28779e+06	1.62433e+07	3.01561e+07	291493	1.1305		1	2020-04-30	0.00402081		0	0.122015	0.154761	0.00216577	0.140845	0	720008	1.46328e+07	0.995979	1.62433e+07	1.13475	540000	0.0288	1.5387	1.1305	0.111085	0.195535	0.0664996				2020-04-30	0
2020-05-01	4.43208e+06	0			0.22	2.37112e+06	1.68349e+07	3.14677e+07	184740	1.94605		0	2020-05-01	0.0041957		0.6	0.126094	0.173768	0.00224466	0.140845	0.6	719785	1.53526e+07	0.995804	1.68349e+07	1.13475	541000	0.02877	1.53828	1.1305	0.122402	0.201754	0.0734354				2020-05-01	0
2020-05-02	4.76167e+06	0			0	2.59933e+06	1.84553e+07	3.38079e+07	329593	1.12999		1	2020-05-02	0.00450771		0	0.137832	0.19435	0.0024607	0.140845	0	729225	1.60818e+07	0.995492	1.84553e+07	1.13475	542000	0.02874	1.53802	1.12999	0.134538	0.207537	0.0809745				2020-05-02	0
2020-05-03	4.97147e+06	0			0	2.70643e+06	1.92156e+07	3.52975e+07	209802	1.12964		1	2020-05-03	0.00470633		0	0.143097	0.216431	0.00256208	0.140845	0	747125	1.6829e+07	0.995294	1.92156e+07	1.13475	543000	0.02871	1.12982	1.12964	0.147485	0.212832	0.0891451				2020-05-03	0
2020-05-04	5.18985e+06	0			0.22	2.81957e+06	2.0019e+07	3.68479e+07	218377	1.94471		0	2020-05-04	0.00491306		0.6	0.14865	0.239872	0.0026692	0.140845	0.6	1.31729e+06	1.81462e+07	0.995087	2.0019e+07	1.13475	544000	0.02868	1.53717	1.12964	0.161209	0.217588	0.0979696				2020-05-04	0
2020-05-05	5.58151e+06	0			0	3.0257e+06	2.14825e+07	3.96287e+07	391660	1.12918		1	2020-05-05	0.00528383		0	0.159057	0.264455	0.00286433	0.140845	0	822642	1.89689e+07	0.994716	2.14825e+07	1.13475	545000	0.02865	1.53694	1.12918	0.17566	0.221754	0.107465				2020-05-05	0
2020-05-06	5.82555e+06	0			0.22	3.15388e+06	2.23925e+07	4.13614e+07	244040	1.94358		0	2020-05-06	0.00551485		0.6	0.165319	0.289881	0.00298567	0.140845	0.6	1.44735e+06	2.04162e+07	0.994485	2.23925e+07	1.13475	546000	0.02862	1.53638	1.12918	0.190758	0.225276	0.117639				2020-05-06	0
2020-05-07	6.26339e+06	0			0	3.38787e+06	2.40538e+07	4.44701e+07	437843	1.1285		1	2020-05-07	0.00592935		0	0.177073	0.315764	0.00320718	0.140845	0	909931	2.13262e+07	0.994071	2.40538e+07	1.13475	547000	0.02859	1.53604	1.1285	0.206396	0.228104	0.12849				2020-05-07	0
2020-05-08	6.53648e+06	0			0.22	3.53279e+06	2.50828e+07	4.6409e+07	273085	1.12803		1	2020-05-08	0.00618787		0	0.184118	0.341636	0.00334438	0.140845	0	1.59518e+06	2.29213e+07	0.993812	2.50828e+07	1.13475	548000	0.02856	1.12826	1.12803	0.222438	0.2302	0.140002				2020-05-08	0
2020-05-09	6.82113e+06	0			0	3.59277e+06	2.55086e+07	4.843e+07	284649	1.12773		1	2020-05-09	0.00645733		0	0.186706	0.366951	0.00340115	0.140845	0	1.01153e+06	2.39329e+07	0.993543	2.55086e+07	1.13475	549000	0.02853	1.12788	1.12773	0.238718	0.231534	0.152145				2020-05-09	0
2020-05-10	7.11053e+06	0			0	3.7397e+06	2.65519e+07	5.04848e+07	289406	1.12743		1	2020-05-10	0.0067313		0	0.193785	0.391103	0.00354025	0.140845	0	1.04071e+06	2.49736e+07	0.993269	2.65519e+07	1.13475	550000	0.0285	1.12758	1.12743	0.25504	0.232084	0.164872				2020-05-10	0
2020-05-11	7.41169e+06	0			0.22	3.89428e+06	2.76494e+07	5.2623e+07	301160	1.94075		0	2020-05-11	0.0070164		0.6	0.201216	0.41345	0.00368659	0.140845	0.6	1.84393e+06	2.68175e+07	0.992984	2.76494e+07	1.13475	551000	0.02847	1.53409	1.12743	0.27118	0.231838	0.178116				2020-05-11	0
2020-05-12	7.95154e+06	0			0	4.17442e+06	2.96384e+07	5.64559e+07	539845	1.12679		1	2020-05-12	0.00752746		0	0.215073	0.433343	0.00395179	0.140845	0	1.16446e+06	2.7982e+07	0.992473	2.96384e+07	1.13475	552000	0.02844	1.53377	1.12679	0.286892	0.230794	0.191791				2020-05-12	0
2020-05-13	8.28752e+06	0			0.22	4.34639e+06	3.08594e+07	5.88414e+07	335979	1.93919		0	2020-05-13	0.00784552		0.6	0.223293	0.45016	0.00411458	0.140845	0.6	2.0696e+06	3.00516e+07	0.992154	3.08594e+07	1.13475	553000	0.02841	1.53299	1.12679	0.301914	0.228965	0.205789				2020-05-13	0
2020-05-14	8.88955e+06	0			0	4.65693e+06	3.30642e+07	6.31158e+07	602035	1.12585		1	2020-05-14	0.00841544		0	0.238563	0.463339	0.00440856	0.140845	0	1.31165e+06	3.13632e+07	0.991585	3.30642e+07	1.13475	554000	0.02838	1.53252	1.12585	0.315973	0.226376	0.219981				2020-05-14	0
2020-05-15	9.26405e+06	0			0.22	4.8467e+06	3.44115e+07	6.57748e+07	374501	1.1252		1	2020-05-15	0.00876997		0	0.247574	0.47241	0.00458821	0.140845	0	2.34011e+06	3.37033e+07	0.99123	3.44115e+07	1.13475	555000	0.02835	1.12553	1.1252	0.328793	0.22306	0.234214				2020-05-15	0
2020-05-16	9.65359e+06	0			0	4.90664e+06	3.48371e+07	6.85405e+07	389538	1.1248		1	2020-05-16	0.00913873		0	0.249921	0.477028	0.00464495	0.140845	0	1.48959e+06	3.51929e+07	0.990861	3.48371e+07	1.13475	556000	0.02832	1.125	1.1248	0.340106	0.219059	0.248318				2020-05-16	0
2020-05-17	1.00478e+07	0			0	5.09105e+06	3.61465e+07	7.13394e+07	394214	1.12438		1	2020-05-17	0.00951192		0	0.258574	0.476985	0.00481953	0.140845	0	1.55048e+06	3.67434e+07	0.990488	3.61465e+07	1.13475	557000	0.02829	1.12459	1.12438	0.349663	0.214421	0.262102				2020-05-17	0
2020-05-18	1.04567e+07	0			0.22	5.28155e+06	3.7499e+07	7.42425e+07	408878	1.93532		0	2020-05-18	0.00989899		0.6	0.267485	0.472227	0.00499987	0.140845	0.6	2.78079e+06	3.95242e+07	0.990101	3.7499e+07	1.13475	558000	0.02826	1.52985	1.12438	0.357239	0.209202	0.275364				2020-05-18	0
2020-05-19	1.11868e+07	0			0	5.62e+06	3.9902e+07	7.94262e+07	730106	1.12352		1	2020-05-19	0.0105902		0	0.283815	0.462853	0.00532027	0.140845	0	1.73268e+06	4.12569e+07	0.98941	3.9902e+07	1.13475	559000	0.02823	1.52942	1.12352	0.362645	0.203462	0.287889				2020-05-19	0
2020-05-20	1.16378e+07	0			0.22	5.82697e+06	4.13715e+07	8.26284e+07	451013	1.12274		1	2020-05-20	0.0110171		0	0.29343	0.449111	0.0055162	0.140845	0	3.10869e+06	4.43656e+07	0.988983	4.13715e+07	1.13475	560000	0.0282	1.12313	1.12274	0.365736	0.197265	0.29946				2020-05-20	0
2020-05-21	1.21051e+07	0			0	5.85643e+06	4.15806e+07	8.59462e+07	467297	1.12225		1	2020-05-21	0.0114595		0	0.294074	0.431389	0.00554408	0.140845	0	1.93891e+06	4.63045e+07	0.988541	4.15806e+07	1.13475	561000	0.02817	1.12249	1.12225	0.366415	0.190679	0.309863				2020-05-21	0
2020-05-22	1.25746e+07	0			0.22	6.0528e+06	4.29749e+07	8.92793e+07	469456	1.12175		1	2020-05-22	0.0119039		0	0.303071	0.410191	0.00572998	0.140845	0	2.02101e+06	4.83255e+07	0.988096	4.29749e+07	1.13475	562000	0.02814	1.122	1.12175	0.364639	0.183773	0.318893				2020-05-22	0
2020-05-23	1.30595e+07	0			0	6.25313e+06	4.43972e+07	9.27227e+07	484981	1.12125		1	2020-05-23	0.012363		0	0.312212	0.386115	0.00591963	0.140845	0	2.05478e+06	5.03803e+07	0.987637	4.43972e+07	1.13475	563000	0.02811	1.1215	1.12125	0.360423	0.176616	0.326362				2020-05-23	0
2020-05-24	1.35603e+07	0			0	6.46453e+06	4.58982e+07	9.62784e+07	500807	1.12073		1	2020-05-24	0.0128371		0	0.321851	0.359831	0.00611976	0.140845	0	2.13824e+06	5.25185e+07	0.987163	4.58982e+07	1.13475	564000	0.02808	1.12099	1.12073	0.353835	0.169276	0.332104				2020-05-24	0
2020-05-25	1.40778e+07	0			0.22	6.68087e+06	4.74342e+07	9.99527e+07	517497	1.12019		1	2020-05-25	0.013327		0	0.331678	0.332041	0.00632456	0.140845	0	3.8329e+06	5.63514e+07	0.986673	4.74342e+07	1.13475	565000	0.02805	1.12046	1.12019	0.345	0.16182	0.335984				2020-05-25	0
2020-05-26	1.46124e+07	0			0	6.67558e+06	4.73966e+07	1.03748e+08	534559	1.11963		1	2020-05-26	0.0138331		0	0.330477	0.303452	0.00631955	0.140845	0	2.38545e+06	5.87369e+07	0.986167	4.73966e+07	1.13475	566000	0.02802	1.11991	1.11963	0.334094	0.154311	0.337904				2020-05-26	0
2020-05-27	1.51463e+07	0			0.22	6.87347e+06	4.88017e+07	1.07539e+08	533871	1.11906		1	2020-05-27	0.0143385		0	0.33931	0.274742	0.00650689	0.140845	0	4.27445e+06	6.30113e+07	0.985662	4.88017e+07	1.13475	567000	0.02799	1.11934	1.11906	0.321335	0.146808	0.337802				2020-05-27	0
2020-05-28	1.56957e+07	0			0	6.82085e+06	4.84281e+07	1.11439e+08	549415	1.11848		1	2020-05-28	0.0148586		0	0.335759	0.246529	0.00645707	0.140845	0	2.65896e+06	6.56703e+07	0.985141	4.84281e+07	1.13475	568000	0.02796	1.11877	1.11848	0.306981	0.139364	0.335659				2020-05-28	0
2020-05-29	1.62406e+07	0			0.22	6.99128e+06	4.96381e+07	1.15308e+08	544929	1.11789		1	2020-05-29	0.0153744		0	0.343175	0.219345	0.00661841	0.140845	0	2.76572e+06	6.8436e+07	0.984626	4.96381e+07	1.13475	569000	0.02793	1.11819	1.11789	0.291317	0.132028	0.3315				2020-05-29	0
2020-05-30	1.67989e+07	0			0	7.15999e+06	5.0836e+07	1.19272e+08	558250	1.11731		1	2020-05-30	0.0159029		0	0.350463	0.193618	0.00677813	0.140845	0	2.79892e+06	7.12349e+07	0.984097	5.0836e+07	1.13475	570000	0.0279	1.1176	1.11731	0.274644	0.124843	0.325392				2020-05-30	0
2020-05-31	1.73703e+07	0			0	7.3372e+06	5.20941e+07	1.23329e+08	571423	1.11671		1	2020-05-31	0.0164439		0	0.358122	0.169668	0.00694589	0.140845	0	2.90304e+06	7.41379e+07	0.983556	5.20941e+07	1.13475	571000	0.02787	1.11701	1.11671	0.257272	0.117844	0.317445				2020-05-31	0
2020-06-01	1.79555e+07	0			0.22	7.51358e+06	5.33464e+07	1.27484e+08	585251	1.11609		1	2020-06-01	0.0169979		0	0.365696	0.147699	0.00711285	0.140845	0	5.18375e+06	7.93217e+07	0.983002	5.33464e+07	1.13475	572000	0.02784	1.1164	1.11609	0.239506	0.111063	0.307802				2020-06-01	0
2020-06-02	1.85545e+07	0			0	7.38246e+06	5.24155e+07	1.31737e+08	598990	1.11547		1	2020-06-02	0.017565		0	0.358301	0.127816	0.00698873	0.140845	0	3.2022e+06	8.25239e+07	0.982435	5.24155e+07	1.13475	573000	0.02781	1.11578	1.11547	0.221635	0.104524	0.296645				2020-06-02	0
2020-06-03	1.91427e+07	0			0.22	7.51965e+06	5.33895e+07	1.35913e+08	588206	1.11482		1	2020-06-03	0.0181218		0	0.36393	0.110032	0.0071186	0.140845	0	3.31781e+06	8.58417e+07	0.981878	5.33895e+07	1.13475	574000	0.02778	1.11514	1.11482	0.203925	0.098248	0.284178				2020-06-03	0
2020-06-04	1.97415e+07	0			0	7.65115e+06	5.43231e+07	1.40165e+08	598791	1.11419		1	2020-06-04	0.0186886		0	0.369251	0.0942907	0.00724309	0.140845	0	3.33314e+06	8.91748e+07	0.981311	5.43231e+07	1.13475	575000	0.02775	1.11451	1.11419	0.186613	0.0922486	0.270626				2020-06-04	0
2020-06-05	2.03504e+07	0			0.22	7.79061e+06	5.53133e+07	1.44488e+08	608917	1.11355		1	2020-06-05	0.0192651		0	0.374923	0.0804839	0.00737511	0.140845	0	3.44336e+06	9.26182e+07	0.980735	5.53133e+07	1.13475	576000	0.02772	1.11387	1.11355	0.169898	0.0865362	0.256229				2020-06-05	0
2020-06-06	2.09701e+07	0			0	7.92528e+06	5.62695e+07	1.48888e+08	619658	1.11289		1	2020-06-06	0.0198517		0	0.380331	0.0684682	0.0075026	0.140845	0	3.55573e+06	9.61739e+07	0.980148	5.62695e+07	1.13475	577000	0.02769	1.11322	1.11289	0.153941	0.0811168	0.241229				2020-06-06	0
2020-06-07	2.16001e+07	0			0	8.05448e+06	5.71868e+07	1.53361e+08	630000	1.11223		1	2020-06-07	0.0204481		0	0.385444	0.0580811	0.0076249	0.140845	0	3.67423e+06	9.98482e+07	0.979552	5.71868e+07	1.13475	578000	0.02766	1.11256	1.11223	0.138864	0.0759926	0.225863				2020-06-07	0
2020-06-08	2.224e+07	0			0.22	8.17687e+06	5.80557e+07	1.57904e+08	639886	1.11155		1	2020-06-08	0.0210539		0	0.390202	0.0491531	0.00774077	0.140845	0	3.79537e+06	1.03644e+08	0.978946	5.80557e+07	1.13475	579000	0.02763	1.11189	1.11155	0.124753	0.0711626	0.210361				2020-06-08	0
2020-06-09	2.28892e+07	0			0	8.29152e+06	5.88698e+07	1.62513e+08	649214	1.11086		1	2020-06-09	0.0216684		0	0.394562	0.0415164	0.00784931	0.140845	0	3.79048e+06	1.07434e+08	0.978332	5.88698e+07	1.13475	580000	0.0276	1.11121	1.11086	0.111658	0.0666232	0.194933				2020-06-09	0
2020-06-10	2.35471e+07	0			0.22	8.41556e+06	5.97505e+07	1.67184e+08	657910	1.11017		1	2020-06-10	0.0222913		0	0.399341	0.0350112	0.00796673	0.140845	0	3.90085e+06	1.11335e+08	0.977709	5.97505e+07	1.13475	581000	0.02757	1.11051	1.11017	0.0995992	0.0623682	0.179768				2020-06-10	0
2020-06-11	2.42144e+07	0			0	8.53348e+06	6.05877e+07	1.71923e+08	667333	1.10946		1	2020-06-11	0.022923		0	0.403801	0.0294896	0.00807836	0.140845	0	3.869e+06	1.15204e+08	0.977077	6.05877e+07	1.13475	582000	0.02754	1.10981	1.10946	0.0885716	0.0583896	0.16503				2020-06-11	0
2020-06-12	2.48907e+07	0			0.22	8.6648e+06	6.15201e+07	1.76724e+08	676253	1.10874		1	2020-06-12	0.0235632		0	0.408866	0.0248169	0.00820268	0.140845	0	3.96358e+06	1.19167e+08	0.976437	6.15201e+07	1.13475	583000	0.02751	1.1091	1.10874	0.0785498	0.0546782	0.150853				2020-06-12	0
2020-06-13	2.55769e+07	0			0	8.79277e+06	6.24287e+07	1.81596e+08	686217	1.10802		1	2020-06-13	0.0242128		0	0.413742	0.0208729	0.00832382	0.140845	0	4.0571e+06	1.23225e+08	0.975787	6.24287e+07	1.13475	584000	0.02748	1.10838	1.10802	0.0694926	0.0512232	0.137345				2020-06-13	0
2020-06-14	2.62728e+07	0			0	8.91724e+06	6.33124e+07	1.86537e+08	695895	1.10728		1	2020-06-14	0.0248716		0	0.418424	0.0175513	0.00844165	0.140845	0	4.15528e+06	1.2738e+08	0.975128	6.33124e+07	1.13475	585000	0.02745	1.10765	1.10728	0.061348	0.0480132	0.124586				2020-06-14	0
2020-06-15	2.69781e+07	0			0.22	9.03727e+06	6.41646e+07	1.91544e+08	705276	1.10653		1	2020-06-15	0.0255393		0	0.42287	0.0147592	0.00855528	0.140845	0	4.25283e+06	1.31633e+08	0.974461	6.41646e+07	1.13475	586000	0.02742	1.1069	1.10653	0.0540563	0.0450362	0.112627				2020-06-15	0
2020-06-16	2.76924e+07	0			0	9.15256e+06	6.49832e+07	1.96616e+08	714287	1.10577		1	2020-06-16	0.0262154		0	0.427068	0.0124159	0.00866443	0.140845	0	4.17626e+06	1.35809e+08	0.973785	6.49832e+07	1.13475	587000	0.02739	1.10615	1.10577	0.0475537	0.0422799	0.101498				2020-06-16	0
2020-06-17	2.84153e+07	0			0.22	9.28726e+06	6.59396e+07	2.01748e+08	722904	1.10501		1	2020-06-17	0.0268998		0	0.432142	0.0104519	0.00879194	0.140845	0	4.25142e+06	1.4006e+08	0.9731	6.59396e+07	1.13475	588000	0.02736	1.10539	1.10501	0.0417751	0.0397318	0.0912105				2020-06-17	0
2020-06-18	2.91483e+07	0			0	9.42151e+06	6.68927e+07	2.06953e+08	733034	1.10423		1	2020-06-18	0.0275937		0	0.437164	0.00880762	0.00891902	0.140845	0	4.32331e+06	1.44384e+08	0.972406	6.68927e+07	1.13475	589000	0.02733	1.10462	1.10423	0.0366556	0.0373796	0.081755				2020-06-18	0
2020-06-19	2.98914e+07	0			0.22	9.5557e+06	6.78454e+07	2.12229e+08	743107	1.10344		1	2020-06-19	0.0282972		0	0.442153	0.00743219	0.00904606	0.140845	0	4.39957e+06	1.48783e+08	0.971703	6.78454e+07	1.13475	590000	0.0273	1.10384	1.10344	0.0321323	0.035211	0.0731107				2020-06-19	0
2020-06-20	3.06446e+07	0			0	9.68919e+06	6.87933e+07	2.17576e+08	753154	1.10264		1	2020-06-20	0.0290102		0	0.44708	0.00628252	0.00917244	0.140845	0	4.473e+06	1.53256e+08	0.97099	6.87933e+07	1.13475	591000	0.02727	1.10304	1.10264	0.0281453	0.0332141	0.0652456				2020-06-20	0
2020-06-21	3.14077e+07	0			0	9.82232e+06	6.97384e+07	2.22995e+08	763123	1.10183		1	2020-06-21	0.0297326		0	0.451959	0.00532211	0.00929846	0.140845	0	4.54319e+06	1.57799e+08	0.970267	6.97384e+07	1.13475	592000	0.02724	1.10224	1.10183	0.0246384	0.0313774	0.0581202				2020-06-21	0
2020-06-22	3.21807e+07	0			0.22	9.95547e+06	7.06838e+07	2.28483e+08	773041	1.10101		1	2020-06-22	0.0304644		0	0.45681	0.00452022	0.00942451	0.140845	0	4.60942e+06	1.62409e+08	0.969536	7.06838e+07	1.13475	593000	0.02721	1.10142	1.10101	0.0215596	0.0296896	0.0516897				2020-06-22	0
2020-06-23	3.29637e+07	0			0	1.00892e+07	7.16333e+07	2.34042e+08	782937	1.10018		1	2020-06-23	0.0312056		0	0.461657	0.00385095	0.0095511	0.140845	0	4.67116e+06	1.6708e+08	0.968794	7.16333e+07	1.13475	594000	0.02718	1.1006	1.10018	0.0188608	0.0281403	0.0459062				2020-06-23	0
2020-06-24	3.37565e+07	0			0.22	1.02241e+07	7.25914e+07	2.39671e+08	792855	1.09934		1	2020-06-24	0.0319562		0	0.46653	0.00329257	0.00967885	0.140845	0	4.73807e+06	1.71818e+08	0.968044	7.25914e+07	1.13475	595000	0.02715	1.09976	1.09934	0.0164985	0.0267191	0.0407206				2020-06-24	0
2020-06-25	3.45594e+07	0			0	1.03597e+07	7.35535e+07	2.45372e+08	802846	1.09849		1	2020-06-25	0.0327162		0	0.471399	0.00282686	0.00980714	0.140845	0	4.8014e+06	1.76619e+08	0.967284	7.35535e+07	1.13475	596000	0.02712	1.09892	1.09849	0.0144333	0.0254166	0.0360838				2020-06-25	0
2020-06-26	3.53722e+07	0			0.22	1.04963e+07	7.45234e+07	2.51143e+08	812856	1.09763		1	2020-06-26	0.0334857		0	0.476287	0.00243854	0.00993645	0.140845	0	4.87214e+06	1.81492e+08	0.966514	7.45234e+07	1.13475	597000	0.02709	1.09806	1.09763	0.0126298	0.0242236	0.0319478				2020-06-26	0
2020-06-27	3.61952e+07	0			0	1.0633e+07	7.54941e+07	2.56986e+08	822928	1.09676		1	2020-06-27	0.0342648		0	0.481151	0.00211484	0.0100659	0.140845	0	4.94085e+06	1.86432e+08	0.965735	7.54941e+07	1.13475	598000	0.02706	1.09719	1.09676	0.0110563	0.0231317	0.0282664				2020-06-27	0
2020-06-28	3.70281e+07	0			0	1.07701e+07	7.64674e+07	2.629e+08	832984	1.09587		1	2020-06-28	0.0350533		0	0.486001	0.00184505	0.0101957	0.140845	0	5.00746e+06	1.9144e+08	0.964947	7.64674e+07	1.13475	599000	0.02703	1.09631	1.09587	0.00968456	0.0221329	0.024996				2020-06-28	0
2020-06-29	3.78712e+07	0			0.22	1.09078e+07	7.74455e+07	2.68885e+08	843043	1.09498		1	2020-06-29	0.0358514		0	0.490852	0.00162024	0.0103261	0.140845	0	5.07144e+06	1.96511e+08	0.964149	7.74455e+07	1.13475	600000	0.027	1.09542	1.09498	0.00848956	0.0212197	0.0220956				2020-06-29	0
2020-06-30	3.87243e+07	0			0	1.10467e+07	7.84313e+07	2.74943e+08	853130	1.09407		1	2020-06-30	0.036659		0	0.495721	0.00143293	0.0104575	0.140845	0	5.13262e+06	2.01644e+08	0.963341	7.84313e+07	1.13475	601000	0.02697	1.09452	1.09407	0.00744919	0.0203851	0.0195272				2020-06-30	0
2020-07-01	3.95876e+07	0			0.22	1.1187e+07	7.94279e+07	2.81072e+08	863274	1.09316		1	2020-07-01	0.0374763		0	0.500629	0.00127688	0.0105904	0.140845	0	5.20454e+06	2.06848e+08	0.962524	7.94279e+07	1.13475	602000	0.02694	1.09361	1.09316	0.00654393	0.0196228	0.0172558				2020-07-01	0
2020-07-02	4.04611e+07	0			0	1.13275e+07	8.04253e+07	2.87274e+08	873512	1.09223		1	2020-07-02	0.0383032		0	0.505511	0.0011469	0.0107234	0.140845	0	5.27606e+06	2.12125e+08	0.961697	8.04253e+07	1.13475	603000	0.02691	1.09269	1.09223	0.0057566	0.0189268	0.0152494				2020-07-02	0
2020-07-03	4.13448e+07	0			0.22	1.14681e+07	8.14237e+07	2.93548e+08	883730	1.09129		1	2020-07-03	0.0391398		0	0.51037	0.00103862	0.0108565	0.140845	0	5.34739e+06	2.17472e+08	0.96086	8.14237e+07	1.13475	604000	0.02688	1.09176	1.09129	0.00507213	0.0182914	0.0134789				2020-07-03	0
2020-07-04	4.22388e+07	0			0	1.16089e+07	8.24233e+07	2.99895e+08	893932	1.09034		1	2020-07-04	0.039986		0	0.515205	0.000948434	0.0109898	0.140845	0	5.41818e+06	2.2289e+08	0.960014	8.24233e+07	1.13475	605000	0.02685	1.09081	1.09034	0.00447729	0.0177116	0.011918				2020-07-04	0
2020-07-05	4.31429e+07	0			0	1.17499e+07	8.34243e+07	3.06314e+08	904119	1.08938		1	2020-07-05	0.0408419		0	0.520021	0.000873319	0.0111232	0.140845	0	5.48859e+06	2.28379e+08	0.959158	8.34243e+07	1.13475	606000	0.02682	1.08986	1.08938	0.00396051	0.0171826	0.010543				2020-07-05	0
2020-07-06	4.40572e+07	0			0.22	1.18912e+07	8.44272e+07	3.12806e+08	914294	1.08841		1	2020-07-06	0.0417075		0	0.524817	0.000810759	0.011257	0.140845	0	5.55885e+06	2.33938e+08	0.958293	8.44272e+07	1.13475	607000	0.02679	1.08889	1.08841	0.00351166	0.0167	0.00933259				2020-07-06	0
2020-07-07	4.49816e+07	0			0	1.20327e+07	8.54321e+07	3.1937e+08	924460	1.08743		1	2020-07-07	0.0425826		0	0.529596	0.000758656	0.0113909	0.140845	0	5.62927e+06	2.39567e+08	0.957417	8.54321e+07	1.13475	608000	0.02676	1.08792	1.08743	0.00312192	0.0162599	0.00826774				2020-07-07	0
2020-07-08	4.59163e+07	0			0.22	1.21744e+07	8.64386e+07	3.26005e+08	934618	1.08643		1	2020-07-08	0.0434674		0	0.534356	0.000715265	0.0115251	0.140845	0	5.7002e+06	2.45267e+08	0.956533	8.64386e+07	1.13475	609000	0.02673	1.08693	1.08643	0.00278356	0.0158586	0.00733146				2020-07-08	0
2020-07-09	4.6861e+07	0			0	1.23164e+07	8.74462e+07	3.32713e+08	944766	1.08543		1	2020-07-09	0.0443618		0	0.539093	0.00067913	0.0116595	0.140845	0	5.77128e+06	2.51038e+08	0.955638	8.74462e+07	1.13475	610000	0.0267	1.08593	1.08543	0.00248987	0.0154926	0.00650862				2020-07-09	0
2020-07-10	4.78159e+07	0			0.22	1.24584e+07	8.84547e+07	3.39493e+08	954896	1.08441		1	2020-07-10	0.0452657		0	0.543806	0.000649039	0.011794	0.140845	0	5.84279e+06	2.56881e+08	0.954734	8.84547e+07	1.13475	611000	0.02667	1.08492	1.08441	0.00223498	0.0151589	0.00578579				2020-07-10	0
2020-07-11	4.87809e+07	0			0	1.26005e+07	8.94634e+07	3.46345e+08	965005	1.08339		1	2020-07-11	0.0461793		0	0.548492	0.000623981	0.0119285	0.140845	0	5.91418e+06	2.62795e+08	0.953821	8.94634e+07	1.13475	612000	0.02664	1.0839	1.08339	0.00201381	0.0148546	0.00515104				2020-07-11	0
2020-07-12	4.9756e+07	0			0	1.27426e+07	9.04724e+07	3.53268e+08	975087	1.08235		1	2020-07-12	0.0471024		0	0.553149	0.000603114	0.012063	0.140845	0	5.98561e+06	2.68781e+08	0.952898	9.04724e+07	1.13475	613000	0.02661	1.08287	1.08235	0.00182191	0.0145771	0.00459384				2020-07-12	0
2020-07-13	5.07412e+07	0			0.22	1.28847e+07	9.14813e+07	3.60262e+08	985140	1.0813		1	2020-07-13	0.048035		0	0.557777	0.000585738	0.0121975	0.140845	0	6.05722e+06	2.74838e+08	0.951965	9.14813e+07	1.13475	614000	0.02658	1.08183	1.0813	0.00165542	0.014324	0.00410483				2020-07-13	0
2020-07-14	5.17363e+07	0			0	1.30267e+07	9.24897e+07	3.67328e+08	995162	1.08025		1	2020-07-14	0.048977		0	0.562373	0.000571269	0.012332	0.140845	0	6.12925e+06	2.80967e+08	0.951023	9.24897e+07	1.13475	615000	0.02655	1.08078	1.08025	0.00151101	0.0140931	0.0036758				2020-07-14	0
2020-07-15	5.27415e+07	0			0.22	1.31686e+07	9.3497e+07	3.74464e+08	1.00515e+06	1.07918		1	2020-07-15	0.0499286		0	0.566933	0.00055922	0.0124663	0.140845	0	6.20193e+06	2.87169e+08	0.950071	9.3497e+07	1.13475	616000	0.02652	1.07971	1.07918	0.00138574	0.0138824	0.00329946				2020-07-15	0
2020-07-16	5.37565e+07	0			0	1.33102e+07	9.45022e+07	3.81672e+08	1.01509e+06	1.0781		1	2020-07-16	0.0508895		0	0.571453	0.000549186	0.0126003	0.140845	0	6.27448e+06	2.93444e+08	0.94911	9.45022e+07	1.13475	617000	0.02649	1.07864	1.0781	0.00127709	0.0136901	0.00296941				2020-07-16	0
2020-07-17	5.47815e+07	0			0.22	1.34514e+07	9.5505e+07	3.88949e+08	1.02498e+06	1.07701		1	2020-07-17	0.0518598		0	0.575929	0.00054083	0.012734	0.140845	0	6.34692e+06	2.99791e+08	0.94814	9.5505e+07	1.13475	618000	0.02646	1.07755	1.07701	0.00118286	0.0135145	0.00268001				2020-07-17	0
2020-07-18	5.58163e+07	0			0	1.35923e+07	9.65052e+07	3.96296e+08	1.0348e+06	1.07591		1	2020-07-18	0.0528395		0	0.580362	0.000533871	0.0128674	0.140845	0	6.41924e+06	3.0621e+08	0.947161	9.65052e+07	1.13475	619000	0.02643	1.07646	1.07591	0.00110114	0.0133542	0.00242629				2020-07-18	0
2020-07-19	5.68609e+07	0			0	1.37327e+07	9.75024e+07	4.03712e+08	1.04457e+06	1.07479		1	2020-07-19	0.0538283		0	0.584749	0.000528075	0.0130003	0.140845	0	6.49149e+06	3.12701e+08	0.946172	9.75024e+07	1.13475	620000	0.0264	1.07535	1.07479	0.00103027	0.0132077	0.00220388				2020-07-19	0
2020-07-20	5.79152e+07	0			0.22	1.38727e+07	9.84963e+07	4.11198e+08	1.05428e+06	1.07367		1	2020-07-20	0.0548264		0	0.589088	0.000523248	0.0131328	0.140845	0	6.56367e+06	3.19265e+08	0.945174	9.84963e+07	1.13475	621000	0.02637	1.07423	1.07367	0.000968822	0.0130737	0.00200894				2020-07-20	0
2020-07-21	5.89791e+07	0			0	1.40122e+07	9.94864e+07	4.18752e+08	1.06391e+06	1.07254		1	2020-07-21	0.0558335		0	0.593377	0.000519228	0.0132649	0.140845	0	6.63579e+06	3.25901e+08	0.944166	9.94864e+07	1.13475	622000	0.02634	1.07311	1.07254	0.000915534	0.0129512	0.0018381				2020-07-21	0
2020-07-22	6.00526e+07	0			0.22	1.4151e+07	1.00472e+08	4.26373e+08	1.07347e+06	1.0714		1	2020-07-22	0.0568498		0	0.597614	0.000515879	0.0133963	0.140845	0	6.70784e+06	3.32609e+08	0.94315	1.00472e+08	1.13475	623000	0.02631	1.07197	1.0714	0.000869327	0.012839	0.00168838				2020-07-22	0
2020-07-23	6.11355e+07	0			0	1.42892e+07	1.01453e+08	4.34062e+08	1.08295e+06	1.07024		1	2020-07-23	0.057875		0	0.601796	0.000513089	0.0135271	0.140845	0	6.77976e+06	3.39389e+08	0.942125	1.01453e+08	1.13475	624000	0.02628	1.07082	1.07024	0.000829262	0.0127362	0.0015572				2020-07-23	0
2020-07-24	6.22279e+07	0			0.22	1.44267e+07	1.02429e+08	4.41818e+08	1.09235e+06	1.06908		1	2020-07-24	0.0589091		0	0.60592	0.000510764	0.0136573	0.140845	0	6.85154e+06	3.4624e+08	0.941091	1.02429e+08	1.13475	625000	0.02625	1.06966	1.06908	0.000794522	0.012642	0.00144225				2020-07-24	0
2020-07-25	6.33295e+07	0			0	1.45633e+07	1.034e+08	4.4964e+08	1.10166e+06	1.06791		1	2020-07-25	0.059952		0	0.609985	0.000508827	0.0137866	0.140845	0	6.92312e+06	3.53163e+08	0.940048	1.034e+08	1.13475	626000	0.02622	1.06849	1.06791	0.000764401	0.0125556	0.00134155				2020-07-25	0
2020-07-26	6.44404e+07	0			0	1.46991e+07	1.04364e+08	4.57527e+08	1.11088e+06	1.06672		1	2020-07-26	0.0610036		0	0.613987	0.000507212	0.0139152	0.140845	0	6.9945e+06	3.60158e+08	0.938996	1.04364e+08	1.13475	627000	0.02619	1.06732	1.06672	0.000738284	0.0124762	0.00125333				2020-07-26	0
2020-07-27	6.55604e+07	0			0.22	1.4834e+07	1.05321e+08	4.65479e+08	1.11999e+06	1.06553		1	2020-07-27	0.0620638		0	0.617925	0.000505867	0.0140428	0.140845	0	7.06565e+06	3.67223e+08	0.937936	1.05321e+08	1.13475	628000	0.02616	1.06613	1.06553	0.00071564	0.0124032	0.00117604				2020-07-27	0
2020-07-28	6.66894e+07	0			0	1.49678e+07	1.06271e+08	4.73495e+08	1.129e+06	1.06433		1	2020-07-28	0.0631326		0	0.621795	0.000504745	0.0141695	0.140845	0	7.13655e+06	3.7436e+08	0.936867	1.06271e+08	1.13475	629000	0.02613	1.06493	1.06433	0.000696006	0.0123359	0.00110834				2020-07-28	0
2020-07-29	6.78273e+07	0			0.22	1.51006e+07	1.07214e+08	4.81574e+08	1.1379e+06	1.06311		1	2020-07-29	0.0642099		0	0.625595	0.000503809	0.0142952	0.140845	0	7.20713e+06	3.81567e+08	0.93579	1.07214e+08	1.13475	630000	0.0261	1.06372	1.06311	0.000678982	0.012274	0.00104903				2020-07-29	0
2020-07-30	6.8974e+07	0			0	1.52322e+07	1.08148e+08	4.89715e+08	1.14669e+06	1.06189		1	2020-07-30	0.0652954		0	0.629323	0.000503028	0.0144198	0.140845	0	7.27733e+06	3.88844e+08	0.934705	1.08148e+08	1.13475	631000	0.02607	1.0625	1.06189	0.000664222	0.0122168	0.000997082				2020-07-30	0
2020-07-31	7.01293e+07	0			0.22	1.53625e+07	1.09074e+08	4.97918e+08	1.15535e+06	1.06066		1	2020-07-31	0.0663891		0	0.632976	0.000502376	0.0145432	0.140845	0	7.34711e+06	3.96191e+08	0.933611	1.09074e+08	1.13475	632000	0.02604	1.06128	1.06066	0.000651424	0.0121639	0.000951579				2020-07-31	0
2020-08-01	7.12932e+07	0			0	1.54916e+07	1.09991e+08	5.06182e+08	1.16389e+06	1.05942		1	2020-08-01	0.0674909		0	0.636552	0.000501831	0.0146654	0.140845	0	7.41647e+06	4.03608e+08	0.932509	1.09991e+08	1.13475	633000	0.02601	1.06004	1.05942	0.000640328	0.012115	0.000911724
2020-08-02	7.24655e+07	0			0	1.56193e+07	1.10897e+08	5.14505e+08	1.17229e+06	1.05817		1	2020-08-02	0.0686007		0	0.640048	0.000501376	0.0147863	0.140845	0	7.48536e+06	4.11093e+08	0.931399	1.10897e+08	1.13475	634000	0.02598	1.05879	1.05817	0.000630706	0.0120696	0.000876816
2020-08-03	7.36461e+07	0			0.22	1.57456e+07	1.11794e+08	5.22887e+08	1.18056e+06	1.05691		1	2020-08-03	0.0697183		0	0.643463	0.000500995	0.0149059	0.140845	0	7.55377e+06	4.18647e+08	0.930282	1.11794e+08	1.13475	635000	0.02595	1.05754	1.05691	0.000622362	0.0120275	0.000846241
2020-08-04	7.48348e+07	0			0	1.58704e+07	1.1268e+08	5.31327e+08	1.18869e+06	1.05564		1	2020-08-04	0.0708436		0	0.646794	0.000500677	0.015024	0.140845	0	7.62165e+06	4.26269e+08	0.929156	1.1268e+08	1.13475	636000	0.02592	1.05628	1.05564	0.000615127	0.0119883	0.000819462
2020-08-05	7.60315e+07	0			0.22	1.59936e+07	1.13555e+08	5.39823e+08	1.19668e+06	1.05436		1	2020-08-05	0.0719765		0	0.650039	0.00050041	0.0151406	0.140845	0	7.68898e+06	4.33958e+08	0.928024	1.13555e+08	1.13475	637000	0.02589	1.055	1.05436	0.000608853	0.0119517	0.000796007
2020-08-06	7.7236e+07	0			0	1.61152e+07	1.14418e+08	5.48375e+08	1.20451e+06	1.05308		1	2020-08-06	0.0731167		0	0.653195	0.000500185	0.0152557	0.140845	0	7.75571e+06	4.41713e+08	0.926883	1.14418e+08	1.13475	638000	0.02586	1.05372	1.05308	0.000603411	0.0119175	0.000775463
2020-08-07	7.84482e+07	0			0.22	1.6235e+07	1.15269e+08	5.56982e+08	1.21218e+06	1.05178		1	2020-08-07	0.0742643		0	0.65626	0.000499997	0.0153691	0.140845	0	7.8218e+06	4.49535e+08	0.925736	1.15269e+08	1.13475	639000	0.02583	1.05243	1.05178	0.000598692	0.0118855	0.000757471
2020-08-08	7.96678e+07	0			0	1.6353e+07	1.16107e+08	5.65642e+08	1.21969e+06	1.05048		1	2020-08-08	0.0754189		0	0.659232	0.000499838	0.0154809	0.140845	0	7.88723e+06	4.57422e+08	0.924581	1.16107e+08	1.13475	640000	0.0258	1.05113	1.05048	0.000594599	0.0118555	0.000741711
2020-08-09	8.08949e+07	0			0	1.64692e+07	1.16931e+08	5.74354e+08	1.22704e+06	1.04917		1	2020-08-09	0.0765805		0	0.662108	0.000499705	0.0155908	0.140845	0	7.95195e+06	4.65374e+08	0.92342	1.16931e+08	1.13475	641000	0.02577	1.04983	1.04917	0.000591048	0.0118273	0.000727908
2020-08-10	8.21291e+07	0			0.22	1.65834e+07	1.17742e+08	5.83117e+08	1.23422e+06	1.04785		1	2020-08-10	0.0777489		0	0.664887	0.000499591	0.015699	0.140845	0	8.01592e+06	4.7339e+08	0.922251	1.17742e+08	1.13475	642000	0.02574	1.04851	1.04785	0.000587968	0.0118007	0.000715818
2020-08-11	8.33703e+07	0			0	1.66956e+07	1.18539e+08	5.91929e+08	1.24121e+06	1.04653		1	2020-08-11	0.0789239		0	0.667566	0.000499495	0.0158052	0.140845	0	8.07911e+06	4.81469e+08	0.921076	1.18539e+08	1.13475	643000	0.02571	1.04719	1.04653	0.000585295	0.0117756	0.000705228
2020-08-12	8.46184e+07	0			0.22	1.68058e+07	1.19321e+08	6.0079e+08	1.24803e+06	1.04519		1	2020-08-12	0.0801054		0	0.670143	0.000499414	0.0159095	0.140845	0	8.14148e+06	4.89611e+08	0.919895	1.19321e+08	1.13475	644000	0.02568	1.04586	1.04519	0.000582976	0.0117519	0.000695951
2020-08-13	8.5873e+07	0			0	1.69137e+07	1.20088e+08	6.09698e+08	1.25466e+06	1.04385		1	2020-08-13	0.0812931		0	0.672616	0.000499344	0.0160117	0.140845	0	8.20299e+06	4.97814e+08	0.918707	1.20088e+08	1.13475	645000	0.02565	1.04452	1.04385	0.000580963	0.0117293	0.000687826
2020-08-14	8.71341e+07	0			0.22	1.70195e+07	1.20838e+08	6.18652e+08	1.26111e+06	1.04251		1	2020-08-14	0.082487		0	0.674984	0.000499284	0.0161118	0.140845	0	8.26361e+06	5.06077e+08	0.917513	1.20838e+08	1.13475	646000	0.02562	1.04318	1.04251	0.000579216	0.0117078	0.000680707
2020-08-15	8.84015e+07	0			0	1.7123e+07	1.21573e+08	6.2765e+08	1.26735e+06	1.04115		1	2020-08-15	0.0836867		0	0.677243	0.000499232	0.0162097	0.140845	0	8.32329e+06	5.14401e+08	0.916313	1.21573e+08	1.13475	647000	0.02559	1.04183	1.04115	0.000577699	0.0116874	0.000674471
2020-08-16	8.96749e+07	0			0	1.72241e+07	1.22291e+08	6.36692e+08	1.2734e+06	1.03979		1	2020-08-16	0.0848922		0	0.679394	0.000499187	0.0163054	0.140845	0	8.38201e+06	5.22783e+08	0.915108	1.22291e+08	1.13475	648000	0.02556	1.04047	1.03979	0.000576381	0.0116678	0.000669007
2020-08-17	9.09541e+07	0			0.22	1.73227e+07	1.22991e+08	6.45774e+08	1.27924e+06	1.03842		1	2020-08-17	0.0861032		0	0.681432	0.000499148	0.0163989	0.140845	0	8.43972e+06	5.31222e+08	0.913897	1.22991e+08	1.13475	649000	0.02553	1.03911	1.03842	0.000575236	0.0116491	0.00066422
2020-08-18	9.2239e+07	0			0	1.74189e+07	1.23674e+08	6.54897e+08	1.28488e+06	1.03705		1	2020-08-18	0.0873196		0	0.683358	0.000499114	0.0164899	0.140845	0	8.4964e+06	5.39719e+08	0.91268	1.23674e+08	1.13475	650000	0.0255	1.03774	1.03705	0.000574241	0.0116311	0.000660025
2020-08-19	9.35293e+07	0			0.22	1.75126e+07	1.24339e+08	6.64058e+08	1.29031e+06	1.03567		1	2020-08-19	0.0885411		0	0.685169	0.000499084	0.0165786	0.140845	0	8.552e+06	5.48271e+08	0.911459	1.24339e+08	1.13475	651000	0.02547	1.03636	1.03567	0.000573376	0.0116139	0.000656349
2020-08-20	9.48248e+07	0			0	1.76036e+07	1.24985e+08	6.73256e+08	1.29551e+06	1.03428		1	2020-08-20	0.0897675		0	0.686863	0.000499056	0.0166647	0.140845	0	8.60649e+06	5.56877e+08	0.910233	1.24985e+08	1.13475	652000	0.02544	1.03497	1.03428	0.000572624	0.0115972	0.000653127
2020-08-21	9.61253e+07	0			0.22	1.76919e+07	1.25612e+08	6.8249e+08	1.3005e+06	1.03289		1	2020-08-21	0.0909986		0	0.688439	0.000499032	0.0167483	0.140845	0	8.65983e+06	5.65537e+08	0.909001	1.25612e+08	1.13475	653000	0.02541	1.03359	1.03289	0.000571969	0.0115811	0.000650302
2020-08-22	9.74306e+07	0			0	1.77775e+07	1.2622e+08	6.91757e+08	1.30527e+06	1.03149		1	2020-08-22	0.0922343		0	0.689896	0.00049901	0.0168293	0.140845	0	8.71199e+06	5.74249e+08	0.907766	1.2622e+08	1.13475	654000	0.02538	1.03219	1.03149	0.000571399	0.0115655	0.000647826
2020-08-23	9.87404e+07	0			0	1.78602e+07	1.26808e+08	7.01057e+08	1.30981e+06	1.03009		1	2020-08-23	0.0934742		0	0.691232	0.00049899	0.0169077	0.140845	0	8.76293e+06	5.83012e+08	0.906526	1.26808e+08	1.13475	655000	0.02535	1.03079	1.03009	0.000570902	0.0115504	0.000645655
2020-08-24	1.00055e+08	0			0.22	1.79401e+07	1.27375e+08	7.10387e+08	1.31412e+06	1.02868		1	2020-08-24	0.0947183		0	0.692445	0.000498971	0.0169833	0.140845	0	8.81263e+06	5.91825e+08	0.905282	1.27375e+08	1.13475	656000	0.02532	1.02939	1.02868	0.000570468	0.0115357	0.00064375
2020-08-25	1.01373e+08	0			0	1.80171e+07	1.27922e+08	7.19746e+08	1.31819e+06	1.02727		1	2020-08-25	0.0959662		0	0.693535	0.000498954	0.0170562	0.140845	0	8.86103e+06	6.00686e+08	0.904034	1.27922e+08	1.13475	657000	0.02529	1.02798	1.02727	0.00057009	0.0115213	0.000642079
2020-08-26	1.02695e+08	0			0.22	1.80911e+07	1.28447e+08	7.29133e+08	1.32203e+06	1.02586		1	2020-08-26	0.0972177		0	0.694501	0.000498938	0.0171263	0.140845	0	8.90812e+06	6.09594e+08	0.902782	1.28447e+08	1.13475	658000	0.02526	1.02656	1.02586	0.000571023	0.0115074	0.000640613
2020-08-27	1.0402e+08	0			0	1.81621e+07	1.28951e+08	7.38545e+08	1.32563e+06	1.02444		1	2020-08-27	0.0984726		0	0.695341	0.000498923	0.0171934	0.140845	0	8.95385e+06	6.18548e+08	0.901527	1.28951e+08	1.13475	659000	0.02523	1.02515	1.02444	0.000572026	0.0114938	0.000639326
2020-08-28	1.05349e+08	0			0.22	1.823e+07	1.29433e+08	7.47981e+08	1.32899e+06	1.02301		1	2020-08-28	0.0997307		0	0.696054	0.000498908	0.0172577	0.140845	0	8.9982e+06	6.27546e+08	0.900269	1.29433e+08	1.13475	660000	0.0252	1.02372	1.02301	0.000573093	0.0114804	0.000638195
2020-08-29	1.06681e+08	0			0	1.82947e+07	1.29893e+08	7.57439e+08	1.33211e+06	1.02158		1	2020-08-29	0.100992		0	0.696639	0.000498894	0.017319	0.140845	0	9.04114e+06	6.36587e+08	0.899008	1.29893e+08	1.13475	661000	0.02517	1.0223	1.02158	0.000572951	0.0114674	0.000637202
2020-08-30	1.08016e+08	0			0	1.83563e+07	1.3033e+08	7.66917e+08	1.33497e+06	1.02015		1	2020-08-30	0.102256		0	0.697096	0.000498881	0.0173773	0.140845	0	9.08263e+06	6.4567e+08	0.897744	1.3033e+08	1.13475	662000	0.02514	1.02087	1.02015	0.000572838	0.0114546	0.00063633
2020-08-31	1.09354e+08	0			0.22	1.84146e+07	1.30744e+08	7.76414e+08	1.33759e+06	1.01872		1	2020-08-31	0.103522		0	0.697423	0.000498868	0.0174325	0.140845	0	9.12265e+06	6.54792e+08	0.896478	1.30744e+08	1.13475	663000	0.02511	1.01944	1.01872	0.000571485	0.011442	0.000635562
2020-09-01	1.10694e+08	0			0	1.84697e+07	1.31135e+08	7.85927e+08	1.33995e+06	1.01728		1	2020-09-01	0.10479		0	0.697621	0.000498855	0.0174847	0.140845	0	9.16117e+06	6.63954e+08	0.89521	1.31135e+08	1.13475	664000	0.02508	1.018	1.01728	0.000572659	0.0114296	0.000634887
2020-09-02	1.12036e+08	0			0.22	1.85215e+07	1.31502e+08	7.95456e+08	1.34207e+06	1.01584		1	2020-09-02	0.106061		0	0.697689	0.000498843	0.0175337	0.140845	0	9.19815e+06	6.73152e+08	0.893939	1.31502e+08	1.13475	665000	0.02505	1.01656	1.01584	0.000573881	0.0114174	0.000634292
2020-09-03	1.1338e+08	0			0	1.85699e+07	1.31846e+08	8.04998e+08	1.34392e+06	1.0144		1	2020-09-03	0.107333		0	0.697625	0.000498831	0.0175795	0.140845	0	9.23357e+06	6.82385e+08	0.892667	1.31846e+08	1.13475	666000	0.02502	1.01512	1.0144	0.000576419	0.0114055	0.000633768
2020-09-04	1.14726e+08	0			0.22	1.86149e+07	1.32166e+08	8.14551e+08	1.34552e+06	1.01296		1	2020-09-04	0.108607		0	0.697431	0.00049882	0.0176221	0.140845	0	9.26742e+06	6.91653e+08	0.891393	1.32166e+08	1.13475	667000	0.02499	1.01368	1.01296	0.00057776	0.0113936	0.000633306
2020-09-05	1.16072e+08	0			0	1.86565e+07	1.32461e+08	8.24114e+08	1.34686e+06	1.01151		1	2020-09-05	0.109882		0	0.697105	0.000498808	0.0176615	0.140845	0	9.29965e+06	7.00952e+08	0.890118	1.32461e+08	1.13475	668000	0.02496	1.01223	1.01151	0.000577865	0.011382	0.000632898
2020-09-06	1.1742e+08	0			0	1.86946e+07	1.32732e+08	8.33684e+08	1.34795e+06	1.01007		1	2020-09-06	0.111158		0	0.696648	0.000498797	0.0176976	0.140845	0	9.33024e+06	7.10283e+08	0.888842	1.32732e+08	1.13475	669000	0.02493	1.01079	1.01007	0.000576714	0.0113704	0.000632537
2020-09-07	1.18769e+08	0			0.22	1.87293e+07	1.32978e+08	8.43261e+08	1.34877e+06	1.00862		1	2020-09-07	0.112435		0	0.696059	0.000498785	0.0177304	0.140845	0	9.35918e+06	7.19642e+08	0.887565	1.32978e+08	1.13475	670000	0.0249	1.00934	1.00862	0.000576816	0.011359	0.000632218
2020-09-08	1.20118e+08	0			0	1.87604e+07	1.33199e+08	8.52841e+08	1.34933e+06	1.00717		1	2020-09-08	0.113712		0	0.695338	0.000498774	0.0177599	0.140845	0	9.38644e+06	7.29028e+08	0.886288	1.33199e+08	1.13475	671000	0.02487	1.00789	1.00717	0.00057821	0.0113478	0.000631935
2020-09-09	1.21468e+08	0			0.22	1.8788e+07	1.33395e+08	8.62423e+08	1.34964e+06	1.00572		1	2020-09-09	0.11499		0	0.694486	0.000498763	0.017786	0.140845	0	9.412e+06	7.3844e+08	0.88501	1.33395e+08	1.13475	672000	0.02484	1.00644	1.00572	0.000579644	0.0113366	0.000631684
2020-09-10	1.22818e+08	0			0	1.88121e+07	1.33566e+08	8.72006e+08	1.34968e+06	1.00427		1	2020-09-10	0.116267		0	0.693503	0.000498752	0.0178088	0.140845	0	9.43585e+06	7.47876e+08	0.883733	1.33566e+08	1.13475	673000	0.02481	1.00499	1.00427	0.000581105	0.0113256	0.000631461
2020-09-11	1.24167e+08	0			0.22	1.88325e+07	1.33711e+08	8.81587e+08	1.34946e+06	1.00282		1	2020-09-11	0.117545		0	0.692389	0.000498741	0.0178281	0.140845	0	9.45795e+06	7.57334e+08	0.882455	1.33711e+08	1.13475	674000	0.02478	1.00354	1.00282	0.000581296	0.0113146	0.000631262
2020-09-12	1.25516e+08	0			0	1.88494e+07	1.33831e+08	8.91165e+08	1.34897e+06	1.00137		1	2020-09-12	0.118822		0	0.691145	0.00049873	0.0178441	0.140845	0	9.4783e+06	7.66812e+08	0.881178	1.33831e+08	1.13475	675000	0.02475	1.00209	1.00137	0.000580182	0.0113038	0.000631084
2020-09-13	1.26864e+08	0			0	1.88627e+07	1.33925e+08	9.00737e+08	1.34823e+06	0.99992		1	2020-09-13	0.120098		0	0.689771	0.000498719	0.0178567	0.140845	0	9.49688e+06	7.76309e+08	0.879902	1.33925e+08	1.13475	676000	0.02472	1.00065	0.99992	0.000579035	0.011293	0.000630925
2020-09-14	1.28212e+08	0			0.22	1.88723e+07	1.33993e+08	9.10303e+08	1.34723e+06	0.998472		1	2020-09-14	0.121374		0	0.688268	0.000498708	0.0178658	0.140845	0	9.51367e+06	7.85823e+08	0.878626	1.33993e+08	1.13475	677000	0.02469	0.999196	0.998472	0.000579144	0.0112823	0.000630783
2020-09-15	1.29558e+08	0			0.65	1.88783e+07	1.34036e+08	9.19859e+08	1.34596e+06	0.997025		1	2020-09-15	0.122648		0	0.686636	0.000498697	0.0178715	0.140845	0	9.52866e+06	7.95352e+08	0.877352	1.34036e+08	1.13475	678000	0.02466	0.997749	0.997025	0.000580572	0.0112717	0.000630655
2020-09-16	1.30902e+08	0			0.65	1.88807e+07	1.34053e+08	9.29404e+08	1.34444e+06	0.995579		1	2020-09-16	0.123921		0	0.684877	0.000498686	0.0178737	0.140845	0	9.54185e+06	8.04893e+08	0.876079	1.34053e+08	1.13475	679000	0.02463	0.996302	0.995579	0.000580736	0.0112612	0.000630539
2020-09-17	1.32245e+08	0			0.65	1.88794e+07	1.34044e+08	9.38937e+08	1.34266e+06	0.994135		1	2020-09-17	0.125192		0	0.682991	0.000498676	0.0178725	0.140845	0	9.55321e+06	8.14447e+08	0.874808	1.34044e+08	1.13475	680000	0.0246	0.994857	0.994135	0.00058216	0.0112508	0.000630434
2020-09-18	1.33585e+08	0			0.65	1.88745e+07	1.34009e+08	9.48456e+08	1.34062e+06	0.992692		1	2020-09-18	0.126461		0	0.680979	0.000498665	0.0178679	0.140845	0	9.56274e+06	8.24009e+08	0.873539	1.34009e+08	1.13475	681000	0.02457	0.993414	0.992692	0.000582274	0.0112404	0.000630339
2020-09-19	1.34924e+08	0			0.65	1.8866e+07	1.33948e+08	9.57958e+08	1.33833e+06	0.991252		1	2020-09-19	0.127728		0	0.678843	0.000498654	0.0178598	0.140845	0	9.57043e+06	8.3358e+08	0.872272	1.33948e+08	1.13475	682000	0.02454	0.991972	0.991252	0.000581074	0.0112301	0.000630253
2020-09-20	1.36259e+08	0			0.65	1.88538e+07	1.33862e+08	9.67442e+08	1.33578e+06	0.989815		1	2020-09-20	0.128992		0	0.676584	0.000498643	0.0178483	0.140845	0	9.57628e+06	8.43156e+08	0.871008	1.33862e+08	1.13475	683000	0.02451	0.990533	0.989815	0.00057984	0.0112199	0.000630173
2020-09-21	1.37592e+08	0			0.65	1.8838e+07	1.3375e+08	9.76906e+08	1.33298e+06	0.98838		1	2020-09-21	0.130254		0	0.674203	0.000498633	0.0178333	0.140845	0	9.58028e+06	8.52736e+08	0.869746	1.3375e+08	1.13475	684000	0.02448	0.989097	0.98838	0.000579888	0.0112097	0.0006301
2020-09-22	1.38922e+08	0			0.65	1.88186e+07	1.33612e+08	9.86349e+08	1.32994e+06	0.986948		1	2020-09-22	0.131513		0	0.671702	0.000498622	0.017815	0.140845	0	9.58242e+06	8.62319e+08	0.868487	1.33612e+08	1.13475	685000	0.02445	0.987664	0.986948	0.000581221	0.0111996	0.000630033
2020-09-23	1.40249e+08	0			0.65	1.87956e+07	1.33449e+08	9.95768e+08	1.32664e+06	0.985519		1	2020-09-23	0.132769		0	0.669081	0.000498611	0.0177932	0.140845	0	9.58271e+06	8.71901e+08	0.867231	1.33449e+08	1.13475	686000	0.02442	0.986233	0.985519	0.000581273	0.0111895	0.000629971
2020-09-24	1.41572e+08	0			0.65	1.87691e+07	1.3326e+08	1.00516e+09	1.3231e+06	0.984094		1	2020-09-24	0.134022		0	0.666343	0.0004986	0.017768	0.140845	0	9.58114e+06	8.81483e+08	0.865978	1.3326e+08	1.13475	687000	0.02439	0.984807	0.984094	0.000582578	0.0111795	0.000629913
2020-09-25	1.42891e+08	0			0.65	1.87389e+07	1.33046e+08	1.01453e+09	1.31932e+06	0.982673		1	2020-09-25	0.135271		0	0.663489	0.00049859	0.0177395	0.140845	0	9.57771e+06	8.9106e+08	0.864729	1.33046e+08	1.13475	688000	0.02436	0.983383	0.982673	0.000582594	0.0111695	0.000629859
2020-09-26	1.44207e+08	0			0.65	1.87053e+07	1.32807e+08	1.02387e+09	1.3153e+06	0.981255		1	2020-09-26	0.136516		0	0.660521	0.000498579	0.0177076	0.140845	0	9.57243e+06	9.00633e+08	0.863484	1.32807e+08	1.13475	689000	0.02433	0.981964	0.981255	0.00058132	0.0111596	0.000629808
2020-09-27	1.45518e+08	0			0.65	1.86681e+07	1.32543e+08	1.03318e+09	1.31105e+06	0.979842		1	2020-09-27	0.137757		0	0.657441	0.000498568	0.0176724	0.140845	0	9.56531e+06	9.10198e+08	0.862243	1.32543e+08	1.13475	690000	0.0243	0.980549	0.979842	0.000580042	0.0111498	0.00062976
2020-09-28	1.46824e+08	0			0.65	1.86274e+07	1.32255e+08	1.04245e+09	1.30656e+06	0.978434		1	2020-09-28	0.138994		0	0.654251	0.000498558	0.0176339	0.140845	0	9.55633e+06	9.19754e+08	0.861006	1.32255e+08	1.13475	691000	0.02427	0.979138	0.978434	0.000580047	0.01114	0.000629714
2020-09-29	1.48126e+08	0			0.65	1.85833e+07	1.31941e+08	1.0517e+09	1.30183e+06	0.977031		1	2020-09-29	0.140226		0	0.650952	0.000498547	0.0175922	0.140845	0	9.54552e+06	9.293e+08	0.859774	1.31941e+08	1.13475	692000	0.02424	0.977732	0.977031	0.000581335	0.0111302	0.000629671
2020-09-30	1.49423e+08	0			0.65	1.85357e+07	1.31604e+08	1.0609e+09	1.29689e+06	0.975632		1	2020-09-30	0.141454		0	0.647547	0.000498536	0.0175472	0.140845	0	9.53287e+06	9.38833e+08	0.858546	1.31604e+08	1.13475	693000	0.02421	0.976331	0.975632	0.000581335	0.0111205	0.00062963
2020-10-01	1.50715e+08	0			0.65	1.84848e+07	1.31242e+08	1.07007e+09	1.29172e+06	0.974239		1	2020-10-01	0.142677		0	0.644038	0.000498526	0.0174989	0.140845	0	9.51841e+06	9.48351e+08	0.857323	1.31242e+08	1.13475	694000	0.02418	0.974935	0.974239	0.000582616	0.0111108	0.00062959
2020-10-02	1.52001e+08	0			0.65	1.84305e+07	1.30857e+08	1.07921e+09	1.28633e+06	0.972851		1	2020-10-02	0.143894		0	0.640427	0.000498515	0.0174475	0.140845	0	9.50213e+06	9.57853e+08	0.856106	1.30857e+08	1.13475	695000	0.02415	0.973545	0.972851	0.000582609	0.0111012	0.000629552
2020-10-03	1.53282e+08	0			0.65	1.83729e+07	1.30448e+08	1.0883e+09	1.28072e+06	0.971469		1	2020-10-03	0.145107		0	0.636716	0.000498504	0.017393	0.140845	0	9.48405e+06	9.67337e+08	0.854893	1.30448e+08	1.13475	696000	0.02412	0.97216	0.971469	0.000581314	0.0110916	0.000629515
2020-10-04	1.54557e+08	0			0.65	1.8312e+07	1.30015e+08	1.09735e+09	1.27491e+06	0.970094		1	2020-10-04	0.146314		0	0.632907	0.000498494	0.0173354	0.140845	0	9.46419e+06	9.76802e+08	0.853686	1.30015e+08	1.13475	697000	0.02409	0.970782	0.970094	0.000580017	0.0110821	0.000629479
2020-10-05	1.55826e+08	0			0.65	1.82479e+07	1.2956e+08	1.10636e+09	1.26888e+06	0.968724		1	2020-10-05	0.147515		0	0.629004	0.000498483	0.0172747	0.140845	0	9.44256e+06	9.86244e+08	0.852485	1.2956e+08	1.13475	698000	0.02406	0.969409	0.968724	0.000580005	0.0110726	0.000629445
2020-10-06	1.57088e+08	0			0.65	1.81806e+07	1.29083e+08	1.11533e+09	1.26266e+06	0.967361		1	2020-10-06	0.14871		0	0.625008	0.000498472	0.017211	0.140845	0	9.41917e+06	9.95663e+08	0.85129	1.29083e+08	1.13475	699000	0.02403	0.968043	0.967361	0.000581276	0.0110632	0.000629411
2020-10-07	1.58344e+08	0			0.65	1.81102e+07	1.28583e+08	1.12425e+09	1.25623e+06	0.966005		1	2020-10-07	0.149899		0	0.620922	0.000498462	0.0171443	0.140845	0	9.39404e+06	1.00506e+09	0.850101	1.28583e+08	1.13475	700000	0.024	0.966683	0.966005	0.000581259	0.0110537	0.000629378
2020-10-08	1.59594e+08	0			0.65	1.80367e+07	1.28061e+08	1.13312e+09	1.24961e+06	0.964655		1	2020-10-08	0.151082		0	0.616748	0.000498451	0.0170748	0.140845	0	9.36719e+06	1.01442e+09	0.848918	1.28061e+08	1.13475	701000	0.02397	0.96533	0.964655	0.000582526	0.0110444	0.000629346
2020-10-09	1.60837e+08	0			0.65	1.79602e+07	1.27517e+08	1.14194e+09	1.2428e+06	0.963313		1	2020-10-09	0.152259		0	0.612489	0.00049844	0.0170023	0.140845	0	9.33865e+06	1.02376e+09	0.847741	1.27517e+08	1.13475	702000	0.02394	0.963984	0.963313	0.000582507	0.011035	0.000629314
2020-10-10	1.62073e+08	0			0.65	1.78807e+07	1.26953e+08	1.15072e+09	1.23581e+06	0.961978		1	2020-10-10	0.153429		0	0.608148	0.00049843	0.0169271	0.140845	0	9.30842e+06	1.03307e+09	0.846571	1.26953e+08	1.13475	703000	0.02391	0.962645	0.961978	0.000581203	0.0110258	0.000629283
2020-10-11	1.63301e+08	0			0.65	1.77983e+07	1.26368e+08	1.15944e+09	1.22863e+06	0.96065		1	2020-10-11	0.154592		0	0.603726	0.000498419	0.0168491	0.140845	0	9.27654e+06	1.04235e+09	0.845408	1.26368e+08	1.13475	704000	0.02388	0.961314	0.96065	0.0005799	0.0110165	0.000629252
2020-10-12	1.64523e+08	0			0.65	1.7713e+07	1.25762e+08	1.16811e+09	1.22128e+06	1.65184		0	2020-10-12	0.155748		0.6	0.599228	0.000498408	0.0167683	0.140845	0.6	9.24303e+06	1.05159e+09	0.844252	1.25762e+08	1.13475	705000	0.02385	1.30625	0.96065	0.000579881	0.0110073	0.000629222
2020-10-13	1.66613e+08	0			0	1.85011e+07	1.31358e+08	1.18295e+09	2.08994e+06	1.64959		0	2020-10-13	0.157727		0.6	0.624217	0.000498398	0.0175144	0.140845	0.6	9.2079e+06	1.0608e+09	0.842273	1.31358e+08	1.13475	706000	0.02382	1.65071	0.96065	0.000581145	0.0109981	0.000629192
2020-10-14	1.68792e+08	0			0.22	1.93842e+07	1.37628e+08	1.19843e+09	2.17994e+06	0.955773		1	2020-10-14	0.15979		0	0.652263	0.000498387	0.0183504	0.140845	0	9.1712e+06	1.06997e+09	0.84021	1.37628e+08	1.13475	707000	0.02379	1.30268	0.955773	0.000581123	0.010989	0.000629162
2020-10-15	1.70116e+08	0			0	1.94158e+07	1.37852e+08	1.20782e+09	1.32335e+06	0.953432		1	2020-10-15	0.161043		0	0.651582	0.000498376	0.0183803	0.140845	0	9.13293e+06	1.0791e+09	0.838957	1.37852e+08	1.13475	708000	0.02376	0.954602	0.953432	0.000582384	0.0109799	0.000629132
2020-10-16	1.71438e+08	0			0.65	1.94517e+07	1.38107e+08	1.21721e+09	1.32226e+06	0.95201		1	2020-10-16	0.162295		0	0.651044	0.000498366	0.0184143	0.140845	0	9.09314e+06	1.0882e+09	0.837705	1.38107e+08	1.13475	709000	0.02373	0.952721	0.95201	0.000582361	0.0109708	0.000629103
2020-10-17	1.72761e+08	0			0.65	1.94938e+07	1.38406e+08	1.2266e+09	1.32273e+06	0.95059		1	2020-10-17	0.163547		0	0.650707	0.000498355	0.0184541	0.140845	0	9.05184e+06	1.09725e+09	0.836453	1.38406e+08	1.13475	710000	0.0237	0.9513	0.95059	0.000581055	0.0109618	0.000629074
2020-10-18	1.74084e+08	0			0.65	1.95425e+07	1.38751e+08	1.236e+09	1.32361e+06	0.949169		1	2020-10-18	0.1648		0	0.650591	0.000498344	0.0185002	0.140845	0	9.00907e+06	1.10626e+09	0.8352	1.38751e+08	1.13475	711000	0.02367	0.949879	0.949169	0.00057975	0.0109528	0.000629045
2020-10-19	1.75409e+08	0			0.65	1.95985e+07	1.39149e+08	1.24541e+09	1.32494e+06	1.6319		0	2020-10-19	0.166054		0.6	0.650715	0.000498334	0.0185533	0.140845	0.6	8.96486e+06	1.11522e+09	0.833946	1.39149e+08	1.13475	712000	0.02364	1.29053	0.949169	0.000579729	0.0109438	0.000629017
2020-10-20	1.77694e+08	0			0	2.06203e+07	1.46404e+08	1.26163e+09	2.28448e+06	0.946323		1	2020-10-20	0.168217		0	0.682814	0.000498323	0.0195206	0.140845	0	8.91924e+06	1.12414e+09	0.831783	1.46404e+08	1.13475	713000	0.02361	1.28911	0.946323	0.000580989	0.0109349	0.000628988
2020-10-21	1.79088e+08	0			0.22	2.07579e+07	1.47381e+08	1.27152e+09	1.39382e+06	0.943869		1	2020-10-21	0.169536		0	0.685535	0.000498312	0.0196508	0.140845	0	8.87224e+06	1.13301e+09	0.830464	1.47381e+08	1.13475	714000	0.02358	0.945096	0.943869	0.000580965	0.010926	0.00062896
2020-10-22	1.80487e+08	0			0.65	2.09078e+07	1.48445e+08	1.28146e+09	1.39948e+06	0.942372		1	2020-10-22	0.170861		0	0.688642	0.000498302	0.0197927	0.140845	0	8.82389e+06	1.14184e+09	0.829139	1.48445e+08	1.13475	715000	0.02355	0.943121	0.942372	0.000582223	0.0109172	0.000628932
2020-10-23	1.81895e+08	0			0.65	2.10724e+07	1.49614e+08	1.29145e+09	1.40735e+06	0.940869		1	2020-10-23	0.172193		0	0.692209	0.000498291	0.0199485	0.140845	0	8.77423e+06	1.15061e+09	0.827807	1.49614e+08	1.13475	716000	0.02352	0.94162	0.940869	0.000582198	0.0109084	0.000628903
2020-10-24	1.83311e+08	0			0.65	2.12527e+07	1.50894e+08	1.30151e+09	1.41617e+06	0.939357		1	2020-10-24	0.173534		0	0.696271	0.000498281	0.0201192	0.140845	0	8.72329e+06	1.15933e+09	0.826466	1.50894e+08	1.13475	717000	0.02349	0.940113	0.939357	0.000580892	0.0108996	0.000628875
2020-10-25	1.84737e+08	0			0.65	2.14501e+07	1.52296e+08	1.31163e+09	1.42599e+06	0.937836		1	2020-10-25	0.174884		0	0.700862	0.00049827	0.0203061	0.140845	0	8.6711e+06	1.16801e+09	0.825116	1.52296e+08	1.13475	718000	0.02346	0.938596	0.937836	0.000579587	0.0108908	0.000628847
2020-10-26	1.86174e+08	0			0.65	2.16657e+07	1.53826e+08	1.32183e+09	1.4369e+06	0.936304		1	2020-10-26	0.176244		0	0.706018	0.000498259	0.0205102	0.140845	0	1.48386e+07	1.18284e+09	0.823756	1.53826e+08	1.13475	719000	0.02343	0.93707	0.936304	0.000579565	0.0108821	0.000628819
2020-10-27	1.87623e+08	0			0.65	2.10247e+07	1.49276e+08	1.33212e+09	1.44898e+06	0.93476		1	2020-10-27	0.177616		0	0.683304	0.000498249	0.0199034	0.140845	0	1.54776e+07	1.19832e+09	0.822384	1.49276e+08	1.13475	720000	0.0234	0.935532	0.93476	0.000580823	0.0108735	0.000628791
2020-10-28	1.89026e+08	0			0.65	2.02486e+07	1.43765e+08	1.34209e+09	1.40379e+06	0.933204		1	2020-10-28	0.178945		0	0.656324	0.000498238	0.0191687	0.140845	0	9.39578e+06	1.20772e+09	0.821055	1.43765e+08	1.13475	721000	0.02337	0.933982	0.933204	0.000580798	0.0108648	0.000628763
2020-10-29	1.90376e+08	0			0.65	2.0275e+07	1.43952e+08	1.35167e+09	1.34972e+06	0.931696		1	2020-10-29	0.180223		0	0.655426	0.000498227	0.0191936	0.140845	0	9.38805e+06	1.21711e+09	0.819777	1.43952e+08	1.13475	722000	0.02334	0.93245	0.931696	0.000582054	0.0108562	0.000628736
2020-10-30	1.91725e+08	0			0.65	2.0302e+07	1.44144e+08	1.36125e+09	1.34929e+06	0.930246		1	2020-10-30	0.1815		0	0.654549	0.000498217	0.0192192	0.140845	0	9.3914e+06	1.2265e+09	0.8185	1.44144e+08	1.13475	723000	0.02331	0.930971	0.930246	0.000582029	0.0108476	0.000628708
2020-10-31	1.93074e+08	0			0.65	2.03282e+07	1.4433e+08	1.37083e+09	1.34899e+06	0.928796		1	2020-10-31	0.182777		0	0.653648	0.000498206	0.0192441	0.140845	0	9.39764e+06	1.2359e+09	0.817223	1.4433e+08	1.13475	724000	0.02328	0.929521	0.928796	0.000580723	0.0108391	0.00062868
2020-11-01	1.94423e+08	0			0.65	2.03533e+07	1.44508e+08	1.3804e+09	1.34863e+06	0.927347		1	2020-11-01	0.184054		0	0.652708	0.000498196	0.0192677	0.140845	0	9.40704e+06	1.2453e+09	0.815946	1.44508e+08	1.13475	725000	0.02325	0.928072	0.927347	0.00057942	0.0108305	0.000628653
2020-11-02	1.95771e+08	0			0.65	2.03765e+07	1.44673e+08	1.38998e+09	1.34818e+06	0.925898		1	2020-11-02	0.18533		0	0.651711	0.000498185	0.0192898	0.140845	0	1.62198e+07	1.26152e+09	0.81467	1.44673e+08	1.13475	726000	0.02322	0.926623	0.925898	0.00058086	0.0108221	0.000628625
2020-11-03	1.97119e+08	0			0.65	1.94396e+07	1.38021e+08	1.39954e+09	1.34761e+06	0.92445		1	2020-11-03	0.186606		0	0.620089	0.000498174	0.0184028	0.140845	0	9.89614e+06	1.27142e+09	0.813394	1.38021e+08	1.13475	727000	0.02319	0.925174	0.92445	0.000582333	0.0108136	0.000628597
2020-11-04	1.98402e+08	0			0.65	1.93294e+07	1.37239e+08	1.40866e+09	1.28364e+06	0.923002		1	2020-11-04	0.187821		0	0.614931	0.000498164	0.0182985	0.140845	0	9.93634e+06	1.28135e+09	0.812179	1.37239e+08	1.13475	728000	0.02316	0.923726	0.923002	0.000582529	0.0108052	0.00062857
2020-11-05	1.99677e+08	0			0.65	1.92043e+07	1.36351e+08	1.41771e+09	1.27437e+06	0.921624		1	2020-11-05	0.189027		0	0.609322	0.000498153	0.0181801	0.140845	0	9.9922e+06	1.29135e+09	0.810973	1.36351e+08	1.13475	729000	0.02313	0.922313	0.921624	0.00058401	0.0107968	0.000628542
2020-11-06	2.00941e+08	0			0.65	1.90612e+07	1.35335e+08	1.42668e+09	1.26423e+06	0.920255		1	2020-11-06	0.190224		0	0.603169	0.000498142	0.0180446	0.140845	0	1.00548e+07	1.3014e+09	0.809776	1.35335e+08	1.13475	730000	0.0231	0.920939	0.920255	0.000584216	0.0107884	0.000628514
2020-11-07	2.02194e+08	0			0.65	1.8898e+07	1.34176e+08	1.43558e+09	1.25294e+06	0.918897		1	2020-11-07	0.19141		0	0.596411	0.000498132	0.0178901	0.140845	0	1.01245e+07	1.31153e+09	0.80859	1.34176e+08	1.13475	731000	0.02307	0.919576	0.918897	0.000582965	0.0107801	0.000628487
2020-11-08	2.03434e+08	0			0.65	1.87124e+07	1.32858e+08	1.44438e+09	1.24038e+06	0.917551		1	2020-11-08	0.192584		0	0.588979	0.000498121	0.0177144	0.140845	0	1.0202e+07	1.32173e+09	0.807416	1.32858e+08	1.13475	732000	0.02304	0.918224	0.917551	0.000584459	0.0107718	0.000628459
2020-11-09	2.04661e+08	0			0.65	1.85019e+07	1.31363e+08	1.45309e+09	1.2264e+06	0.916218		1	2020-11-09	0.193745		0	0.580802	0.000498111	0.0175151	0.140845	0	1.02877e+07	1.33202e+09	0.806255	1.31363e+08	1.13475	733000	0.02301	0.916884	0.916218	0.000586017	0.0107636	0.000628432
2020-11-10	2.05872e+08	0			0.65	1.82637e+07	1.29672e+08	1.46169e+09	1.21084e+06	1.57534		0	2020-11-10	0.194892		0.6	0.571799	0.0004981	0.0172896	0.140845	0.6	9.96692e+06	1.34198e+09	0.805108	1.29672e+08	1.13475	734000	0.02298	1.24578	0.916218	0.000587611	0.0107553	0.000628404
2020-11-11	2.07927e+08	0			0.22	1.8915e+07	1.34297e+08	1.47628e+09	2.05511e+06	0.9136		1	2020-11-11	0.196837		0	0.590612	0.000498089	0.0179062	0.140845	0	9.583e+06	1.35157e+09	0.803163	1.34297e+08	1.13475	735000	0.02295	1.24447	0.9136	0.000587933	0.0107471	0.000628377
2020-11-12	2.09161e+08	0			0	1.87997e+07	1.33478e+08	1.48504e+09	1.23434e+06	0.911392		1	2020-11-12	0.198006		0	0.585446	0.000498079	0.017797	0.140845	0	9.57997e+06	1.36115e+09	0.801994	1.33478e+08	1.13475	736000	0.02292	0.912496	0.911392	0.000588262	0.0107389	0.000628349
2020-11-13	2.10385e+08	0			0.65	1.86742e+07	1.32587e+08	1.49373e+09	1.22385e+06	0.910066		1	2020-11-13	0.199164		0	0.57999	0.000498068	0.0176783	0.140845	0	9.57781e+06	1.37072e+09	0.800836	1.32587e+08	1.13475	737000	0.02289	0.910729	0.910066	0.000588569	0.0107308	0.000628322
2020-11-14	2.11599e+08	0			0.65	1.85391e+07	1.31628e+08	1.50235e+09	1.21391e+06	0.908752		1	2020-11-14	0.200314		0	0.574261	0.000498058	0.0175504	0.140845	0	9.57526e+06	1.3803e+09	0.799686	1.31628e+08	1.13475	738000	0.02286	0.909409	0.908752	0.000588885	0.0107227	0.000628294
2020-11-15	2.12802e+08	0			0.65	1.83939e+07	1.30597e+08	1.5109e+09	1.20339e+06	0.907448		1	2020-11-15	0.201453		0	0.568245	0.000498047	0.0174129	0.140845	0	9.57208e+06	1.38987e+09	0.798547	1.30597e+08	1.13475	739000	0.02283	0.9081	0.907448	0.000590517	0.0107146	0.000628267
2020-11-16	2.13994e+08	0			0.65	1.8238e+07	1.2949e+08	1.51936e+09	1.19225e+06	1.56028		0	2020-11-16	0.202581		0.6	0.561927	0.000498036	0.0172653	0.140845	0.6	9.56805e+06	1.39944e+09	0.797419	1.2949e+08	1.13475	740000	0.0228	1.23387	0.907448	0.000592217	0.0107065	0.00062824
2020-11-17	2.16027e+08	0			0	1.8923e+07	1.34353e+08	1.53379e+09	2.0326e+06	1.55808		0	2020-11-17	0.204506		0.6	0.581479	0.000498026	0.0179137	0.140845	0.6	9.11385e+06	1.40855e+09	0.795494	1.34353e+08	1.13475	741000	0.02277	1.55918	0.907448	0.00059246	0.0106985	0.000628212
2020-11-18	2.18133e+08	0			0.22	1.97453e+07	1.40191e+08	1.54874e+09	2.10596e+06	0.902691		1	2020-11-18	0.206499		0	0.605132	0.000498015	0.0186922	0.140845	0	9.048e+06	1.4176e+09	0.793501	1.40191e+08	1.13475	742000	0.02274	1.23038	0.902691	0.000592675	0.0106905	0.000628185
2020-11-19	2.19406e+08	0			0	1.9744e+07	1.40183e+08	1.55778e+09	1.27313e+06	0.900428		1	2020-11-19	0.207704		0	0.603482	0.000498005	0.018691	0.140845	0	8.976e+06	1.42658e+09	0.792296	1.40183e+08	1.13475	743000	0.02271	0.901559	0.900428	0.00059289	0.0106825	0.000628157
2020-11-20	2.20676e+08	0			0.65	1.97497e+07	1.40223e+08	1.5668e+09	1.26986e+06	0.899061		1	2020-11-20	0.208907		0	0.602047	0.000497994	0.0186964	0.140845	0	8.89587e+06	1.43547e+09	0.791093	1.40223e+08	1.13475	744000	0.02268	0.899745	0.899061	0.000593076	0.0106746	0.00062813
2020-11-21	2.21944e+08	0			0.65	1.9765e+07	1.40332e+08	1.5758e+09	1.2683e+06	0.897697		1	2020-11-21	0.210107		0	0.60091	0.000497983	0.0187109	0.140845	0	8.80668e+06	1.44428e+09	0.789893	1.40332e+08	1.13475	745000	0.02265	0.898379	0.897697	0.000593261	0.0106667	0.000628102
2020-11-22	2.23212e+08	0			0.65	1.9792e+07	1.40523e+08	1.5848e+09	1.26736e+06	0.896334		1	2020-11-22	0.211307		0	0.600128	0.000497973	0.0187364	0.140845	0	8.70741e+06	1.45299e+09	0.788693	1.40523e+08	1.13475	746000	0.02262	0.897015	0.896334	0.000593479	0.0106588	0.000628075
2020-11-23	2.24479e+08	0			0.65	1.98328e+07	1.40813e+08	1.5938e+09	1.26716e+06	1.54103		0	2020-11-23	0.212507		0.6	0.599763	0.000497962	0.018775	0.140845	0.6	8.59695e+06	1.46158e+09	0.787493	1.40813e+08	1.13475	747000	0.02259	1.21868	0.896334	0.000593668	0.010651	0.000628048
2020-11-24	2.26662e+08	0			0	2.0805e+07	1.47716e+08	1.6093e+09	2.18306e+06	0.893611		1	2020-11-24	0.214573		0	0.627488	0.000497952	0.0196954	0.140845	0	1.45913e+07	1.47617e+09	0.785427	1.47716e+08	1.13475	748000	0.02256	1.21732	0.893611	0.000593825	0.0106431	0.00062802
2020-11-25	2.2799e+08	0			0.22	2.00779e+07	1.42553e+08	1.61873e+09	1.32797e+06	0.891266		1	2020-11-25	0.21583		0	0.603944	0.000497941	0.0190071	0.140845	0	8.76382e+06	1.48494e+09	0.78417	1.42553e+08	1.13475	749000	0.02253	0.892439	0.891266	0.000593949	0.0106353	0.000627993
2020-11-26	2.29268e+08	0			0.65	2.01217e+07	1.42864e+08	1.6278e+09	1.27819e+06	0.88984		1	2020-11-26	0.21704		0	0.603652	0.00049793	0.0190486	0.140845	0	8.68932e+06	1.49363e+09	0.78296	1.42864e+08	1.13475	750000	0.0225	0.890553	0.88984	0.000594068	0.0106276	0.000627966
2020-11-27	2.30547e+08	0			0.65	2.01768e+07	1.43255e+08	1.63688e+09	1.27894e+06	0.888467		1	2020-11-27	0.218251		0	0.603692	0.00049792	0.0191007	0.140845	0	8.61878e+06	1.50225e+09	0.781749	1.43255e+08	1.13475	751000	0.02247	0.889153	0.888467	0.000594183	0.0106198	0.000627938
2020-11-28	2.31827e+08	0			0.65	2.02434e+07	1.43728e+08	1.64597e+09	1.28046e+06	0.887093		1	2020-11-28	0.219463		0	0.60407	0.000497909	0.0191637	0.140845	0	8.54407e+06	1.51079e+09	0.780537	1.43728e+08	1.13475	752000	0.02244	0.88778	0.887093	0.000594293	0.0106121	0.000627911
2020-11-29	2.3311e+08	0			0.65	2.03227e+07	1.44291e+08	1.65508e+09	1.2827e+06	0.885717		1	2020-11-29	0.220678		0	0.604822	0.000497899	0.0192388	0.140845	0	8.46498e+06	1.51926e+09	0.779322	1.44291e+08	1.13475	753000	0.02241	0.886405	0.885717	0.000594398	0.0106044	0.000627884
2020-11-30	2.34396e+08	0			0.65	2.04161e+07	1.44955e+08	1.66421e+09	1.28572e+06	1.52272		0	2020-11-30	0.221895		0.6	0.605986	0.000497888	0.0193273	0.140845	0.6	1.44315e+07	1.53369e+09	0.778105	1.44955e+08	1.13475	754000	0.02238	1.20422	0.885717	0.000594468	0.0105967	0.000627856
2020-12-01	2.36616e+08	0			0	2.06041e+07	1.46289e+08	1.67998e+09	2.22058e+06	0.989189		1	2020-12-01	0.223997		0.1	0.609936	0.000497878	0.0195052	0.140845	0	1.49523e+07	1.54864e+09	0.776003	1.46289e+08	1.13475	755000	0.02235	1.25595	0.989189	0.0005945	0.0105891	0.000627829
2020-12-02	2.38072e+08	0			0.22	1.9954e+07	1.41673e+08	1.69031e+09	1.45581e+06	0.986516		1	2020-12-02	0.225375		0.1	0.589117	0.000497867	0.0188898	0.140845	0	9.03925e+06	1.55768e+09	0.774625	1.41673e+08	1.13475	756000	0.02232	0.987853	0.986516	0.000594527	0.0105815	0.000627802
2020-12-03	2.39478e+08	0			0.65	2.00869e+07	1.42617e+08	1.7003e+09	1.40607e+06	0.984764		1	2020-12-03	0.226706		0.1	0.591462	0.000497856	0.0190156	0.140845	0	9.01603e+06	1.56669e+09	0.773294	1.42617e+08	1.13475	757000	0.02229	0.98564	0.984764	0.00059455	0.0105739	0.000627774
2020-12-04	2.40891e+08	0			0.65	2.023e+07	1.43633e+08	1.71033e+09	1.41292e+06	0.983072		1	2020-12-04	0.228044		0.1	0.594088	0.000497846	0.019151	0.140845	0	9.00491e+06	1.5757e+09	0.771956	1.43633e+08	1.13475	758000	0.02226	0.983918	0.983072	0.000594568	0.0105664	0.000627747
2020-12-05	2.42312e+08	0			0.65	2.03822e+07	1.44714e+08	1.72041e+09	1.42054e+06	0.981372		1	2020-12-05	0.229388		0.1	0.596965	0.000497835	0.0192951	0.140845	0	8.99824e+06	1.5847e+09	0.770612	1.44714e+08	1.13475	759000	0.02223	0.982222	0.981372	0.000594583	0.0105588	0.00062772
2020-12-06	2.4374e+08	0			0.65	2.05436e+07	1.45859e+08	1.73056e+09	1.42875e+06	0.979662		1	2020-12-06	0.230741		0.1	0.600089	0.000497825	0.0194479	0.140845	0	8.99685e+06	1.59369e+09	0.769259	1.45859e+08	1.13475	760000	0.0222	0.980517	0.979662	0.000594594	0.0105513	0.000627692
2020-12-07	2.45178e+08	0			0.65	2.0714e+07	1.47069e+08	1.74076e+09	1.43755e+06	1.50306		0	2020-12-07	0.232102		0.6	0.603454	0.000497814	0.0196092	0.140845	0.6	1.54998e+07	1.60919e+09	0.767898	1.47069e+08	1.13475	761000	0.02217	1.24136	0.979662	0.0005946	0.0105439	0.000627665
2020-12-08	2.47402e+08	0			0	2.07548e+07	1.47359e+08	1.75655e+09	2.22388e+06	0.976213		1	2020-12-08	0.234207		0.1	0.603033	0.000497804	0.0196479	0.140845	0	9.4286e+06	1.61862e+09	0.765793	1.47359e+08	1.13475	762000	0.02214	1.23963	0.976213	0.000594601	0.0105364	0.000627638
2020-12-09	2.48849e+08	0			0.22	2.0874e+07	1.48206e+08	1.76683e+09	1.44722e+06	0.973536		1	2020-12-09	0.235577		0.1	0.604882	0.000497793	0.0197608	0.140845	0	9.07518e+06	1.6277e+09	0.764423	1.48206e+08	1.13475	763000	0.02211	0.974874	0.973536	0.000594599	0.010529	0.000627611
2020-12-10	2.50301e+08	0			0.65	2.10474e+07	1.49436e+08	1.77713e+09	1.45155e+06	0.971794		1	2020-12-10	0.236951		0.1	0.608281	0.000497782	0.0199249	0.140845	0	9.08045e+06	1.63678e+09	0.763049	1.49436e+08	1.13475	764000	0.02208	0.972665	0.971794	0.000594595	0.0105216	0.000627583
2020-12-11	2.51762e+08	0			0.65	2.12294e+07	1.50729e+08	1.78751e+09	1.46098e+06	0.970048		1	2020-12-11	0.238334		0.1	0.611907	0.000497772	0.0200972	0.140845	0	9.09126e+06	1.64587e+09	0.761666	1.50729e+08	1.13475	765000	0.02205	0.970921	0.970048	0.000594587	0.0105142	0.000627556
2020-12-12	2.53233e+08	0			0.65	2.14199e+07	1.52082e+08	1.79795e+09	1.47097e+06	0.968289		1	2020-12-12	0.239727		0.1	0.615753	0.000497761	0.0202775	0.140845	0	9.10714e+06	1.65498e+09	0.760273	1.52082e+08	1.13475	766000	0.02202	0.969168	0.968289	0.000594576	0.0105069	0.000627529
2020-12-13	2.54714e+08	0			0.65	2.16187e+07	1.53493e+08	1.80847e+09	1.48148e+06	0.966519		1	2020-12-13	0.241129		0.1	0.619812	0.000497751	0.0204657	0.140845	0	9.12864e+06	1.66411e+09	0.758871	1.53493e+08	1.13475	767000	0.02199	0.967404	0.966519	0.000594563	0.0104995	0.000627502
2020-12-14	2.56207e+08	0			0.65	2.18255e+07	1.54961e+08	1.81907e+09	1.49249e+06	1.48276		0	2020-12-14	0.242542		0.6	0.624073	0.00049774	0.0206615	0.140845	0.6	1.57661e+07	1.67987e+09	0.757458	1.54961e+08	1.13475	768000	0.02196	1.22464	0.966519	0.000594547	0.0104922	0.000627474
2020-12-15	2.58518e+08	0			0	2.19165e+07	1.55607e+08	1.83548e+09	2.31157e+06	0.96294		1	2020-12-15	0.244731		0.1	0.625005	0.00049773	0.0207476	0.140845	0	1.03363e+07	1.69021e+09	0.755269	1.55607e+08	1.13475	769000	0.02193	1.22285	0.96294	0.000594529	0.010485	0.000627447
2020-12-16	2.60026e+08	0			0.22	2.19681e+07	1.55974e+08	1.84618e+09	1.50745e+06	0.960158		1	2020-12-16	0.246158		0.1	0.624808	0.000497719	0.0207965	0.140845	0	9.98306e+06	1.70019e+09	0.753842	1.55974e+08	1.13475	770000	0.0219	0.961549	0.960158	0.00059451	0.0104777	0.00062742
2020-12-17	2.61532e+08	0			0.65	2.20687e+07	1.56688e+08	1.85688e+09	1.50663e+06	0.958344		1	2020-12-17	0.247584		0.1	0.625995	0.000497709	0.0208917	0.140845	0	1.00317e+07	1.71022e+09	0.752416	1.56688e+08	1.13475	771000	0.02187	0.959251	0.958344	0.00059449	0.0104705	0.000627393
2020-12-18	2.63043e+08	0			0.65	2.21664e+07	1.57382e+08	1.8676e+09	1.51067e+06	0.956531		1	2020-12-18	0.249014		0.1	0.627092	0.000497698	0.0209842	0.140845	0	1.00858e+07	1.72031e+09	0.750986	1.57382e+08	1.13475	772000	0.02184	0.957437	0.956531	0.000594469	0.0104633	0.000627365
2020-12-19	2.64557e+08	0			0.65	2.22604e+07	1.58049e+08	1.87836e+09	1.51449e+06	0.954713		1	2020-12-19	0.250448		0.1	0.628072	0.000497688	0.0210732	0.140845	0	1.01441e+07	1.73045e+09	0.749552	1.58049e+08	1.13475	773000	0.02181	0.955622	0.954713	0.000594446	0.0104561	0.000627338
2020-12-20	2.66075e+08	0			0.65	2.23497e+07	1.58683e+08	1.88914e+09	1.51802e+06	0.95289		1	2020-12-20	0.251885		0.1	0.628909	0.000497677	0.0211577	0.140845	0	1.02066e+07	1.74066e+09	0.748115	1.58683e+08	1.13475	774000	0.02178	0.953801	0.95289	0.000594423	0.010449	0.000627311
2020-12-21	2.67597e+08	0			0.65	2.24333e+07	1.59277e+08	1.89994e+09	1.5212e+06	1.46174		0	2020-12-21	0.253325		0.6	0.62958	0.000497666	0.0212369	0.140845	0.6	1.57895e+07	1.75645e+09	0.746675	1.59277e+08	1.13475	775000	0.02175	1.20732	0.95289	0.0005944	0.0104418	0.000627284
2020-12-22	2.69939e+08	0			0	2.25517e+07	1.60117e+08	1.91657e+09	2.34227e+06	0.949232		1	2020-12-22	0.255542		0.1	0.631215	0.000497656	0.0213489	0.140845	0	1.02753e+07	1.76672e+09	0.744458	1.60117e+08	1.13475	776000	0.02172	1.20549	0.949232	0.000594375	0.0104347	0.000627257
2020-12-23	2.71468e+08	0			0.22	2.26335e+07	1.60698e+08	1.92742e+09	1.52906e+06	0.946413		1	2020-12-23	0.25699		0.1	0.631817	0.000497645	0.0214264	0.140845	0	1.0306e+07	1.77703e+09	0.74301	1.60698e+08	1.13475	777000	0.02169	0.947823	0.946413	0.00059435	0.0104277	0.000627229
2020-12-24	2.72998e+08	0			0.65	2.2712e+07	1.61256e+08	1.93829e+09	1.53005e+06	0.944573		1	2020-12-24	0.258438		0.1	0.632317	0.000497635	0.0215007	0.140845	0	1.0373e+07	1.7874e+09	0.741562	1.61256e+08	1.13475	778000	0.02166	0.945493	0.944573	0.000594325	0.0104206	0.000627202
2020-12-25	2.7453e+08	0			0.65	2.27834e+07	1.61762e+08	1.94917e+09	1.53237e+06	0.942732		1	2020-12-25	0.259889		0.1	0.632613	0.000497624	0.0215683	0.140845	0	1.04439e+07	1.79785e+09	0.740111	1.61762e+08	1.13475	779000	0.02163	0.943653	0.942732	0.000594299	0.0104136	0.000627175
2020-12-26	2.76065e+08	0			0.65	2.28467e+07	1.62211e+08	1.96006e+09	1.53419e+06	0.940888		1	2020-12-26	0.261341		0.1	0.632677	0.000497614	0.0216282	0.140845	0	1.05185e+07	1.80837e+09	0.738659	1.62211e+08	1.13475	780000	0.0216	0.94181	0.940888	0.000594272	0.0104066	0.000627148
2020-12-27	2.776e+08	0			0.65	2.29006e+07	1.62594e+08	1.97096e+09	1.53544e+06	0.939041		1	2020-12-27	0.262795		0.1	0.632479	0.000497603	0.0216793	0.140845	0	1.05967e+07	1.81896e+09	0.737205	1.62594e+08	1.13475	781000	0.02157	0.939965	0.939041	0.000594246	0.0103996	0.000627121
2020-12-28	2.79136e+08	0			0.65	2.29442e+07	1.62904e+08	1.98187e+09	1.53604e+06	1.44043		0	2020-12-28	0.264249		0.6	0.631992	0.000497593	0.0217205	0.140845	0.6	1.64121e+07	1.83537e+09	0.735751	1.62904e+08	1.13475	782000	0.02154	1.18973	0.939041	0.000594218	0.0103926	0.000627094
2020-12-29	2.81497e+08	0			0	2.29933e+07	1.63252e+08	1.99863e+09	2.36067e+06	0.935345		1	2020-12-29	0.266484		0.1	0.631654	0.000497582	0.021767	0.140845	0	1.07029e+07	1.84608e+09	0.733516	1.63252e+08	1.13475	783000	0.02151	1.18789	0.935345	0.000594191	0.0103857	0.000627067
2020-12-30	2.83033e+08	0			0.22	2.3022e+07	1.63456e+08	2.00953e+09	1.53619e+06	0.932504		1	2020-12-30	0.267938		0.1	0.630756	0.000497572	0.0217942	0.140845	0	1.06971e+07	1.85677e+09	0.732062	1.63456e+08	1.13475	784000	0.02148	0.933924	0.932504	0.000594164	0.0103788	0.000627039
2020-12-31	2.84566e+08	0			0.65	2.30488e+07	1.63647e+08	2.02042e+09	1.53344e+06	0.930655		1	2020-12-31	0.269389		0.1	0.629805	0.000497561	0.0218195	0.140845	0	1.07258e+07	1.8675e+09	0.730611	1.63647e+08	1.13475	785000	0.02145	0.931579	0.930655	0.000594136	0.0103719	0.000627012
2021-01-01	2.86099e+08	0			0.65	2.30703e+07	1.63799e+08	2.0313e+09	1.53218e+06	0.92881		1	2021-01-01	0.27084		0.1	0.62871	0.000497551	0.0218399	0.140845	0	1.07529e+07	1.87825e+09	0.72916	1.63799e+08	1.13475	786000	0.02142	0.929732	0.92881	0.000594108	0.010365	0.000626985
2021-01-02	2.87629e+08	0			0.65	2.30864e+07	1.63913e+08	2.04217e+09	1.53057e+06	0.926966		1	2021-01-02	0.272289		0.1	0.627469	0.00049754	0.0218551	0.140845	0	1.07779e+07	1.88903e+09	0.727711	1.63913e+08	1.13475	787000	0.02139	0.927888	0.926966	0.000594451	0.0103582	0.000626958
2021-01-03	2.89158e+08	0			0.65	2.3097e+07	1.63989e+08	2.05302e+09	1.52859e+06	0.925124		1	2021-01-03	0.273736		0.1	0.62608	0.00049753	0.0218651	0.140845	0	1.08005e+07	1.89983e+09	0.726264	1.63989e+08	1.13475	788000	0.02136	0.926045	0.925124	0.000594804	0.0103513	0.000626931
2021-01-04	2.90684e+08	0			0.65	2.3102e+07	1.64024e+08	2.06386e+09	1.52625e+06	1.41905		0	2021-01-04	0.275181		0.6	0.624545	0.000497519	0.0218699	0.140845	0.6	1.66301e+07	1.91646e+09	0.724819	1.64024e+08	1.13475	789000	0.02133	1.17209	0.925124	0.000595165	0.0103445	0.000626904
2021-01-05	2.93026e+08	0			0	2.31014e+07	1.6402e+08	2.08048e+09	2.34164e+06	0.921447		1	2021-01-05	0.277398		0.1	0.62286	0.000497508	0.0218693	0.140845	0	1.08563e+07	1.92732e+09	0.722602	1.6402e+08	1.13475	790000	0.0213	1.17025	0.921447	0.000595535	0.0103377	0.000626877
2021-01-06	2.94546e+08	0			0.22	2.30928e+07	1.63959e+08	2.09128e+09	1.52048e+06	0.918629		1	2021-01-06	0.278837		0.1	0.620966	0.000497498	0.0218612	0.140845	0	1.08633e+07	1.93818e+09	0.721163	1.63959e+08	1.13475	791000	0.02127	0.920038	0.918629	0.000595914	0.010331	0.00062685
2021-01-07	2.96061e+08	0			0.65	2.3078e+07	1.63854e+08	2.10204e+09	1.51527e+06	0.916799		1	2021-01-07	0.280271		0.1	0.618911	0.000497487	0.0218472	0.140845	0	1.08798e+07	1.94906e+09	0.719729	1.63854e+08	1.13475	792000	0.02124	0.917714	0.916799	0.000595931	0.0103243	0.000626822
2021-01-08	2.97573e+08	0			0.65	2.30569e+07	1.63704e+08	2.11277e+09	1.51128e+06	0.914976		1	2021-01-08	0.281702		0.1	0.616693	0.000497477	0.0218272	0.140845	0	1.08928e+07	1.95995e+09	0.718298	1.63704e+08	1.13475	793000	0.02121	0.915887	0.914976	0.00059632	0.0103175	0.000626795
2021-01-09	2.9908e+08	0			0.65	2.30297e+07	1.63511e+08	2.12346e+09	1.5069e+06	0.913157		1	2021-01-09	0.283129		0.1	0.614317	0.000497466	0.0218014	0.140845	0	1.09016e+07	1.97086e+09	0.716871	1.63511e+08	1.13475	794000	0.02118	0.914066	0.913157	0.00059672	0.0103108	0.000626768
2021-01-10	3.00582e+08	0			0.65	2.29963e+07	1.63274e+08	2.13413e+09	1.50212e+06	0.911343		1	2021-01-10	0.284551		0.1	0.611789	0.000497456	0.0217699	0.140845	0	1.09059e+07	1.98176e+09	0.715449	1.63274e+08	1.13475	795000	0.02115	0.91225	0.911343	0.000597129	0.0103042	0.000626741
2021-01-11	3.02079e+08	0			0.65	2.29573e+07	1.62997e+08	2.14476e+09	1.49697e+06	1.39792		0	2021-01-11	0.285968		0.6	0.609117	0.000497445	0.0217329	0.140845	0.6	1.67608e+07	1.99852e+09	0.714032	1.62997e+08	1.13475	796000	0.02112	1.15463	0.911343	0.000597548	0.0102975	0.000626714
2021-01-12	3.04371e+08	0			0	2.28889e+07	1.62511e+08	2.16103e+09	2.29231e+06	0.907734		1	2021-01-12	0.288138		0.1	0.60568	0.000497435	0.0216682	0.140845	0	1.09069e+07	2.00943e+09	0.711862	1.62511e+08	1.13475	797000	0.02109	1.15283	0.907734	0.000597978	0.0102909	0.000626687
2021-01-13	3.05855e+08	0			0.22	2.28368e+07	1.62141e+08	2.17157e+09	1.48407e+06	0.904975		1	2021-01-13	0.289543		0.1	0.602685	0.000497424	0.0216188	0.140845	0	1.08874e+07	2.02032e+09	0.710457	1.62141e+08	1.13475	798000	0.02106	0.906355	0.904975	0.000598419	0.0102843	0.00062666
2021-01-14	3.07331e+08	0			0.65	2.27795e+07	1.61735e+08	2.18205e+09	1.47619e+06	0.903189		1	2021-01-14	0.29094		0.1	0.599567	0.000497414	0.0215646	0.140845	0	1.08785e+07	2.0312e+09	0.70906	1.61735e+08	1.13475	799000	0.02103	0.904082	0.903189	0.00059887	0.0102777	0.000626633
2021-01-15	3.08801e+08	0			0.65	2.2717e+07	1.6129e+08	2.19249e+09	1.46959e+06	0.901413		1	2021-01-15	0.292331		0.1	0.59632	0.000497403	0.0215054	0.140845	0	1.0867e+07	2.04206e+09	0.707669	1.6129e+08	1.13475	800000	0.021	0.902301	0.901413	0.000599333	0.0102711	0.000626606
2021-01-16	3.10263e+08	0			0.65	2.26491e+07	1.60808e+08	2.20287e+09	1.46267e+06	0.899644		1	2021-01-16	0.293716		0.1	0.592947	0.000497393	0.0214411	0.140845	0	1.0853e+07	2.05292e+09	0.706284	1.60808e+08	1.13475	801000	0.02097	0.900528	0.899644	0.000599807	0.0102646	0.000626579
2021-01-17	3.11719e+08	0			0.65	2.25759e+07	1.60289e+08	2.2132e+09	1.45543e+06	0.897884		1	2021-01-17	0.295094		0.1	0.58945	0.000497382	0.0213718	0.140845	0	1.08364e+07	2.06375e+09	0.704906	1.60289e+08	1.13475	802000	0.02094	0.898764	0.897884	0.000599912	0.0102581	0.000626552
2021-01-18	3.13167e+08	0			0.65	2.24975e+07	1.59732e+08	2.22348e+09	1.44789e+06	1.37732		0	2021-01-18	0.296465		0.6	0.585832	0.000497372	0.0212977	0.140845	0.6	1.66256e+07	2.08038e+09	0.703535	1.59732e+08	1.13475	803000	0.02091	1.1376	0.897884	0.000600012	0.0102516	0.000626525
2021-01-19	3.1538e+08	0			0	2.23692e+07	1.58821e+08	2.2392e+09	2.2133e+06	0.89439		1	2021-01-19	0.29856		0.1	0.580931	0.000497361	0.0211762	0.140845	0	1.07954e+07	2.09117e+09	0.70144	1.58821e+08	1.13475	804000	0.02088	1.13585	0.89439	0.000600105	0.0102451	0.000626498
2021-01-20	3.16809e+08	0			0.22	2.22778e+07	1.58172e+08	2.24934e+09	1.42906e+06	0.891726		1	2021-01-20	0.299913		0.1	0.577008	0.000497351	0.0210896	0.140845	0	1.07584e+07	2.10193e+09	0.700087	1.58172e+08	1.13475	805000	0.02085	0.893058	0.891726	0.000600192	0.0102386	0.000626471
2021-01-21	3.18228e+08	0			0.65	2.21815e+07	1.57489e+08	2.25942e+09	1.41898e+06	0.890006		1	2021-01-21	0.301256		0.1	0.572976	0.00049734	0.0209985	0.140845	0	1.07301e+07	2.11266e+09	0.698744	1.57489e+08	1.13475	806000	0.02082	0.890866	0.890006	0.000600271	0.0102322	0.000626444
2021-01-22	3.19638e+08	0			0.65	2.20803e+07	1.5677e+08	2.26943e+09	1.41012e+06	0.888298		1	2021-01-22	0.302591		0.1	0.568835	0.00049733	0.0209027	0.140845	0	1.0699e+07	2.12336e+09	0.697409	1.5677e+08	1.13475	807000	0.02079	0.889152	0.888298	0.000600353	0.0102258	0.000626417
2021-01-23	3.21039e+08	0			0.65	2.19744e+07	1.56018e+08	2.27938e+09	1.40099e+06	0.886601		1	2021-01-23	0.303917		0.1	0.56459	0.000497319	0.0208025	0.140845	0	1.06651e+07	2.13403e+09	0.696083	1.56018e+08	1.13475	808000	0.02076	0.88745	0.886601	0.000600427	0.0102194	0.00062639
2021-01-24	3.22431e+08	0			0.65	2.18639e+07	1.55234e+08	2.28926e+09	1.39161e+06	0.884915		1	2021-01-24	0.305235		0.1	0.560246	0.000497309	0.0206978	0.140845	0	1.06285e+07	2.14465e+09	0.694765	1.55234e+08	1.13475	809000	0.02073	0.885758	0.884915	0.000600493	0.010213	0.000626363
2021-01-25	3.23813e+08	0			0.65	2.17489e+07	1.54417e+08	2.29907e+09	1.38198e+06	1.3575		0	2021-01-25	0.306543		0.6	0.555806	0.000497298	0.020589	0.140845	0.6	1.62754e+07	2.16093e+09	0.693457	1.54417e+08	1.13475	810000	0.0207	1.12121	0.884915	0.000600551	0.0102067	0.000626336
2021-01-26	3.25922e+08	0			0	2.15655e+07	1.53115e+08	2.31404e+09	2.10887e+06	0.881577		1	2021-01-26	0.308539		0.1	0.549641	0.000497288	0.0204153	0.140845	0	1.05369e+07	2.17147e+09	0.691461	1.53115e+08	1.13475	811000	0.02067	1.11954	0.881577	0.000600601	0.0102003	0.000626309
2021-01-27	3.2728e+08	0			0.22	2.14394e+07	1.5222e+08	2.32369e+09	1.35797e+06	0.879039		1	2021-01-27	0.309825		0.1	0.544962	0.000497277	0.020296	0.140845	0	1.0481e+07	2.18195e+09	0.690175	1.5222e+08	1.13475	812000	0.02064	0.880308	0.879039	0.000600641	0.010194	0.000626282
2021-01-28	3.28626e+08	0			0.65	2.13093e+07	1.51296e+08	2.33324e+09	1.34615e+06	1.34853		0	2021-01-28	0.311099		0.6	0.540204	0.000497267	0.0201728	0.140845	0.6	1.04341e+07	2.19238e+09	0.688901	1.51296e+08	1.13475	813000	0.02061	1.11379	0.879039	0.000600672	0.0101877	0.000626255
2021-01-29	3.30678e+08	0			0.22	2.18924e+07	1.55436e+08	2.34782e+09	2.0526e+06	0.875785		1	2021-01-29	0.313042		0.1	0.553495	0.000497257	0.0207248	0.140845	0	1.03849e+07	2.20277e+09	0.686958	1.55436e+08	1.13475	814000	0.02058	1.11216	0.875785	0.000600694	0.0101814	0.000626228
2021-01-30	3.32048e+08	0			0	2.17992e+07	1.54774e+08	2.35754e+09	1.3695e+06	0.873315		1	2021-01-30	0.314339		0.1	0.54966	0.000497246	0.0206366	0.140845	0	1.03336e+07	2.2131e+09	0.685661	1.54774e+08	1.13475	815000	0.02055	0.87455	0.873315	0.000600705	0.0101752	0.000626201
2021-01-31	3.33408e+08	0			0.65	2.17036e+07	1.54095e+08	2.36719e+09	1.35983e+06	0.871667		1	2021-01-31	0.315626		0.1	0.545781	0.000497236	0.020546	0.140845	0	1.02801e+07	2.22338e+09	0.684374	1.54095e+08	1.13475	816000	0.02052	0.872491	0.871667	0.000600704	0.0101689	0.000626174
2021-02-01	3.34759e+08	0			0.65	2.1607e+07	1.5341e+08	2.37679e+09	1.35131e+06	1.3372		0	2021-02-01	0.316905		0.6	0.541894	0.000497225	0.0204546	0.140845	0.6	1.57145e+07	2.23909e+09	0.683095	1.5341e+08	1.13475	817000	0.02049	1.10443	0.871667	0.000600702	0.0101627	0.000626147
2021-02-02	3.36823e+08	0			0	2.14575e+07	1.52348e+08	2.39144e+09	2.06378e+06	0.868404		1	2021-02-02	0.318859		0.1	0.536699	0.000497215	0.0203131	0.140845	0	1.01463e+07	2.24924e+09	0.681141	1.52348e+08	1.13475	818000	0.02046	1.1028	0.868404	0.000600697	0.0101565	0.00062612
2021-02-03	3.38154e+08	0			0.22	2.13594e+07	1.51652e+08	2.40089e+09	1.33098e+06	0.86592		1	2021-02-03	0.320119		0.1	0.532811	0.000497204	0.0202202	0.140845	0	1.00747e+07	2.25931e+09	0.679881	1.51652e+08	1.13475	819000	0.02043	0.867162	0.86592	0.00060069	0.0101503	0.000626093
2021-02-04	3.39475e+08	0			0.65	2.12615e+07	1.50957e+08	2.41027e+09	1.32111e+06	1.32842		0	2021-02-04	0.32137		0.6	0.528945	0.000497194	0.0201276	0.140845	0.6	1.00118e+07	2.26933e+09	0.67863	1.50957e+08	1.13475	820000	0.0204	1.09717	0.86592	0.00060068	0.0101442	0.000626066
2021-02-05	3.41492e+08	0			0.22	2.18688e+07	1.55269e+08	2.4246e+09	2.01745e+06	0.862728		1	2021-02-05	0.323279		0.1	0.542592	0.000497183	0.0207025	0.140845	0	9.94706e+06	2.27927e+09	0.676721	1.55269e+08	1.13475	821000	0.02037	1.09557	0.862728	0.000600669	0.010138	0.000626039
2021-02-06	3.4284e+08	0			0	2.18155e+07	1.5489e+08	2.43416e+09	1.34763e+06	0.860301		1	2021-02-06	0.324555		0.1	0.539814	0.000497173	0.020652	0.140845	0	9.88044e+06	2.28915e+09	0.675445	1.5489e+08	1.13475	822000	0.02034	0.861514	0.860301	0.000600655	0.0101319	0.000626012
2021-02-07	3.44181e+08	0			0.65	2.17644e+07	1.54527e+08	2.44368e+09	1.34056e+06	0.858679		1	2021-02-07	0.325824		0.1	0.537103	0.000497162	0.0206037	0.140845	0	9.81205e+06	2.29897e+09	0.674176	1.54527e+08	1.13475	823000	0.02031	0.85949	0.858679	0.000600639	0.0101258	0.000625986
2021-02-08	3.45515e+08	0			0.65	2.17174e+07	1.54193e+08	2.45316e+09	1.3349e+06	1.31727		0	2021-02-08	0.327088		0.6	0.5345	0.000497152	0.0205591	0.140845	0.6	1.4973e+07	2.31394e+09	0.672912	1.54193e+08	1.13475	824000	0.02028	1.08798	0.858679	0.000600621	0.0101197	0.000625959
2021-02-09	3.47559e+08	0			0	2.16519e+07	1.53728e+08	2.46767e+09	2.04341e+06	0.855459		1	2021-02-09	0.329022		0.1	0.531455	0.000497141	0.0204971	0.140845	0	9.64162e+06	2.32358e+09	0.670978	1.53728e+08	1.13475	825000	0.02025	1.08637	0.855459	0.000600602	0.0101136	0.000625932
2021-02-10	3.48882e+08	0			0.22	2.16169e+07	1.5348e+08	2.47706e+09	1.32302e+06	0.853		1	2021-02-10	0.330275		0.1	0.52917	0.000497131	0.020464	0.140845	0	9.55765e+06	2.33314e+09	0.669725	1.5348e+08	1.13475	826000	0.02022	0.854229	0.853	0.00060058	0.0101076	0.000625905
2021-02-11	3.50199e+08	0			0.65	2.15879e+07	1.53274e+08	2.48641e+09	1.31709e+06	1.30858		0	2021-02-11	0.331522		0.6	0.527037	0.00049712	0.0204365	0.140845	0.6	1.45735e+07	2.34771e+09	0.668478	1.53274e+08	1.13475	827000	0.02019	1.08079	0.853	0.000600558	0.0101016	0.000625878
2021-02-12	3.52217e+08	0			0.22	2.15531e+07	1.53027e+08	2.50074e+09	2.01781e+06	0.849822		1	2021-02-12	0.333432		0.1	0.524771	0.00049711	0.0204036	0.140845	0	9.72345e+06	2.35744e+09	0.666568	1.53027e+08	1.13475	828000	0.02016	1.0792	0.849822	0.000600534	0.0100955	0.000625851
2021-02-13	3.53525e+08	0			0	2.14919e+07	1.52592e+08	2.51003e+09	1.30831e+06	0.847394		1	2021-02-13	0.33467		0.1	0.521872	0.000497099	0.0203457	0.140845	0	9.65476e+06	2.36709e+09	0.66533	1.52592e+08	1.13475	829000	0.02013	0.848608	0.847394	0.000600509	0.0100895	0.000625824
2021-02-14	3.54826e+08	0			0.65	2.14329e+07	1.52174e+08	2.51926e+09	1.30086e+06	0.845819		1	2021-02-14	0.335902		0.1	0.519039	0.000497089	0.0202898	0.140845	0	9.59427e+06	2.37668e+09	0.664098	1.52174e+08	1.13475	830000	0.0201	0.846607	0.845819	0.000600483	0.0100836	0.000625797
2021-02-15	3.56121e+08	0			0.65	2.13765e+07	1.51773e+08	2.52846e+09	1.29489e+06	1.29758		0	2021-02-15	0.337128		0.6	0.516278	0.000497079	0.0202364	0.140845	0.6	1.46528e+07	2.39134e+09	0.662872	1.51773e+08	1.13475	831000	0.02007	1.0717	0.845819	0.000600457	0.0100776	0.000625771
2021-02-16	3.58102e+08	0			0	2.1294e+07	1.51187e+08	2.54252e+09	1.98127e+06	0.842695		1	2021-02-16	0.339003		0.1	0.512899	0.000497068	0.0201583	0.140845	0	9.44997e+06	2.40079e+09	0.660997	1.51187e+08	1.13475	832000	0.02004	1.07014	0.842695	0.00060043	0.0100717	0.000625744
2021-02-17	3.59384e+08	0			0.22	2.12448e+07	1.50838e+08	2.55163e+09	1.28174e+06	0.840311		1	2021-02-17	0.340217		0.1	0.510334	0.000497058	0.0201117	0.140845	0	9.37987e+06	2.41017e+09	0.659783	1.50838e+08	1.13475	833000	0.02001	0.841503	0.840311	0.000600402	0.0100658	0.000625717
2021-02-18	3.60659e+08	0			0.65	2.11988e+07	1.50512e+08	2.56068e+09	1.27516e+06	1.28915		0	2021-02-18	0.341424		0.6	0.507857	0.000497047	0.0200682	0.140845	0.6	1.43239e+07	2.42449e+09	0.658576	1.50512e+08	1.13475	834000	0.01998	1.06473	0.840311	0.000600374	0.0100598	0.00062569
2021-02-19	3.62611e+08	0			0.22	2.11334e+07	1.50047e+08	2.57454e+09	1.95204e+06	0.837234		1	2021-02-19	0.343272		0.1	0.504924	0.000497037	0.0200063	0.140845	0	9.5682e+06	2.43406e+09	0.656728	1.50047e+08	1.13475	835000	0.01995	1.06319	0.837234	0.000600346	0.010054	0.000625663
2021-02-20	3.63875e+08	0			0	2.10496e+07	1.49452e+08	2.58351e+09	1.26383e+06	0.834885		1	2021-02-20	0.344468		0.1	0.501565	0.000497026	0.019927	0.140845	0	9.51799e+06	2.44358e+09	0.655532	1.49452e+08	1.13475	836000	0.01992	0.836059	0.834885	0.000600317	0.0100481	0.000625636
2021-02-21	3.6513e+08	0			0.65	2.09643e+07	1.48847e+08	2.59242e+09	1.25529e+06	1.28084		0	2021-02-21	0.345657		0.6	0.498185	0.000497016	0.0198462	0.140845	0.6	9.47782e+06	2.45306e+09	0.654343	1.48847e+08	1.13475	837000	0.01989	1.05786	0.834885	0.000600288	0.0100422	0.000625609
2021-02-22	3.67048e+08	0			0.22	2.15474e+07	1.52987e+08	2.60604e+09	1.918e+06	1.27852		0	2021-02-22	0.347472		0.6	0.510659	0.000497005	0.0203982	0.140845	0.6	1.45082e+07	2.46756e+09	0.652528	1.52987e+08	1.13475	838000	0.01986	1.27968	0.834885	0.000600258	0.0100364	0.000625583
2021-02-23	3.69016e+08	0			0	2.14718e+07	1.5245e+08	2.62001e+09	1.96778e+06	0.829545		1	2021-02-23	0.349335		0.1	0.507492	0.000496995	0.0203266	0.140845	0	9.39345e+06	2.47696e+09	0.650665	1.5245e+08	1.13475	839000	0.01983	1.05403	0.829545	0.000600229	0.0100306	0.000625556
2021-02-24	3.70288e+08	0			0.22	2.14211e+07	1.52089e+08	2.62905e+09	1.27227e+06	0.827177		1	2021-02-24	0.350539		0.1	0.504925	0.000496985	0.0202786	0.140845	0	9.35133e+06	2.48631e+09	0.649461	1.52089e+08	1.13475	840000	0.0198	0.828361	0.827177	0.000600199	0.0100248	0.000625529
2021-02-25	3.71554e+08	0			0.65	2.13696e+07	1.51724e+08	2.63803e+09	1.26564e+06	1.26898		0	2021-02-25	0.351738		0.6	0.502351	0.000496974	0.0202299	0.140845	0.6	1.43265e+07	2.50063e+09	0.648262	1.51724e+08	1.13475	841000	0.01977	1.04808	0.827177	0.000600169	0.010019	0.000625502
2021-02-26	3.73491e+08	0			0.22	2.12888e+07	1.5115e+08	2.65178e+09	1.93697e+06	0.824122		1	2021-02-26	0.353571		0.1	0.499098	0.000496964	0.0201534	0.140845	0	9.28898e+06	2.50992e+09	0.646429	1.5115e+08	1.13475	842000	0.01974	1.04655	0.824122	0.000600138	0.0100133	0.000625475
2021-02-27	3.74744e+08	0			0	2.12336e+07	1.50759e+08	2.66068e+09	1.25318e+06	0.821791		1	2021-02-27	0.354758		0.1	0.496459	0.000496953	0.0201012	0.140845	0	9.23614e+06	2.51916e+09	0.645242	1.50759e+08	1.13475	843000	0.01971	0.822957	0.821791	0.000600108	0.0100075	0.000625449
2021-02-28	3.7599e+08	0			0.65	2.11792e+07	1.50372e+08	2.66953e+09	1.2464e+06	1.26074		0	2021-02-28	0.355938		0.6	0.493846	0.000496943	0.0200496	0.140845	0.6	9.19369e+06	2.52835e+09	0.644062	1.50372e+08	1.13475	844000	0.01968	1.04127	0.821791	0.000600077	0.0100018	0.000625422
2021-03-01	3.77898e+08	0			0.22	2.17915e+07	1.5472e+08	2.68307e+09	1.90725e+06	0.818783		1	2021-03-01	0.357743		0.1	0.50675	0.000496932	0.0206293	0.140845	0	1.4067e+07	2.54242e+09	0.642257	1.5472e+08	1.13475	845000	0.01965	1.03976	0.818783	0.000600047	0.00999606	0.000625395
2021-03-02	3.79172e+08	0			0	2.10847e+07	1.49702e+08	2.69212e+09	1.27447e+06	0.816488		1	2021-03-02	0.35895		0.1	0.488986	0.000496922	0.0199602	0.140845	0	9.10036e+06	2.55152e+09	0.64105	1.49702e+08	1.13475	846000	0.01962	0.817635	0.816488	0.000600016	0.00999037	0.000625368
2021-03-03	3.80402e+08	0			0.65	2.10327e+07	1.49332e+08	2.70085e+09	1.22967e+06	0.814954		1	2021-03-03	0.360114		0.1	0.486458	0.000496912	0.0199109	0.140845	0	9.05362e+06	2.56057e+09	0.639886	1.49332e+08	1.13475	847000	0.01959	0.815721	0.814954	0.000599985	0.00998469	0.000625342
2021-03-04	3.81626e+08	0			0.65	2.09818e+07	1.48971e+08	2.70955e+09	1.22433e+06	1.25027		0	2021-03-04	0.361273		0.6	0.483968	0.000496901	0.0198628	0.140845	0.6	1.38595e+07	2.57443e+09	0.638727	1.48971e+08	1.13475	848000	0.01956	1.03261	0.814954	0.000599954	0.00997903	0.000625315
2021-03-05	3.835e+08	0			0.22	2.09036e+07	1.48416e+08	2.72285e+09	1.87379e+06	0.812		1	2021-03-05	0.363047		0.1	0.480857	0.000496891	0.0197887	0.140845	0	8.97319e+06	2.58341e+09	0.636953	1.48416e+08	1.13475	849000	0.01953	1.03114	0.812	0.000599923	0.00997338	0.000625288
2021-03-06	3.84712e+08	0			0	2.08522e+07	1.4805e+08	2.73146e+09	1.21241e+06	0.809745		1	2021-03-06	0.364194		0.1	0.478373	0.00049688	0.0197401	0.140845	0	8.91253e+06	2.59232e+09	0.635806	1.4805e+08	1.13475	850000	0.0195	0.810873	0.809745	0.000599892	0.00996775	0.000625261
2021-03-07	3.85918e+08	0			0.65	2.0803e+07	1.47701e+08	2.74002e+09	1.20607e+06	1.2423		0	2021-03-07	0.365336		0.6	0.47595	0.00049687	0.0196935	0.140845	0.6	1.36178e+07	2.60594e+09	0.634664	1.47701e+08	1.13475	851000	0.01947	1.02602	0.809745	0.000599861	0.00996214	0.000625235
2021-03-08	3.87764e+08	0			0.22	2.07309e+07	1.4719e+08	2.75313e+09	1.84597e+06	0.806835		1	2021-03-08	0.367084		0.1	0.473015	0.000496859	0.0196253	0.140845	0	1.39712e+07	2.61991e+09	0.632916	1.4719e+08	1.13475	852000	0.01944	1.02457	0.806835	0.00059983	0.00995654	0.000625208
2021-03-09	3.88959e+08	0			0	1.99579e+07	1.41701e+08	2.76161e+09	1.19475e+06	0.804613		1	2021-03-09	0.368215		0.1	0.454141	0.000496849	0.0188935	0.140845	0	9.03314e+06	2.62894e+09	0.631785	1.41701e+08	1.13475	853000	0.01941	0.805724	0.804613	0.000599799	0.00995096	0.000625181
2021-03-10	3.90106e+08	0			0.65	1.98326e+07	1.40812e+08	2.76975e+09	1.14703e+06	1.23445		0	2021-03-10	0.3693		0.6	0.450066	0.000496839	0.0187749	0.140845	0.6	8.98606e+06	2.63793e+09	0.6307	1.40812e+08	1.13475	854000	0.01938	1.01953	0.804613	0.000599767	0.0099454	0.000625154
2021-03-11	3.91855e+08	0			0	2.03157e+07	1.44242e+08	2.78217e+09	1.74874e+06	1.23232		0	2021-03-11	0.370956		0.6	0.459777	0.000496828	0.0192322	0.140845	0.6	1.37525e+07	2.65168e+09	0.629044	1.44242e+08	1.13475	855000	0.01935	1.23339	0.804613	0.000599736	0.00993985	0.000625128
2021-03-12	3.93643e+08	0			0.22	2.0167e+07	1.43186e+08	2.79487e+09	1.78826e+06	0.79969		1	2021-03-12	0.372649		0.1	0.455172	0.000496818	0.0190915	0.140845	0	8.89759e+06	2.66058e+09	0.627351	1.43186e+08	1.13475	856000	0.01932	1.01601	0.79969	0.000599705	0.00993432	0.000625101
2021-03-13	3.94795e+08	0			0	2.00658e+07	1.42467e+08	2.80305e+09	1.15196e+06	0.797538		1	2021-03-13	0.373739		0.1	0.451656	0.000496807	0.0189956	0.140845	0	8.84945e+06	2.66943e+09	0.626261	1.42467e+08	1.13475	857000	0.01929	0.798614	0.797538	0.000599674	0.00992881	0.000625074
2021-03-14	3.95938e+08	0			0.65	1.99625e+07	1.41734e+08	2.81116e+09	1.14309e+06	1.22365		0	2021-03-14	0.374821		0.6	0.448109	0.000496797	0.0188978	0.140845	0.6	1.35414e+07	2.68297e+09	0.625179	1.41734e+08	1.13475	858000	0.01926	1.01059	0.797538	0.000599642	0.00992331	0.000625048
2021-03-15	3.97683e+08	0			0.22	1.98e+07	1.4058e+08	2.82355e+09	1.7448e+06	0.794776		1	2021-03-15	0.376473		0.1	0.443253	0.000496787	0.018744	0.140845	0	9.04872e+06	2.69202e+09	0.623527	1.4058e+08	1.13475	859000	0.01923	1.00921	0.794776	0.000599611	0.00991783	0.000625021
2021-03-16	3.98807e+08	0			0	1.96496e+07	1.39512e+08	2.83153e+09	1.12404e+06	0.792676		1	2021-03-16	0.377537		0.1	0.438689	0.000496776	0.0186016	0.140845	0	8.73068e+06	2.70075e+09	0.622463	1.39512e+08	1.13475	860000	0.0192	0.793726	0.792676	0.00059958	0.00991236	0.000624994
2021-03-17	3.9992e+08	0			0.65	1.95325e+07	1.38681e+08	2.83943e+09	1.11256e+06	1.21623		0	2021-03-17	0.378591		0.6	0.434887	0.000496766	0.0184908	0.140845	0.6	8.69276e+06	2.70944e+09	0.621409	1.38681e+08	1.13475	861000	0.01917	1.00445	0.792676	0.000599548	0.00990691	0.000624968
2021-03-18	4.01616e+08	0			0	2.0005e+07	1.42036e+08	2.85148e+09	1.69686e+06	0.789985		1	2021-03-18	0.380197		0.1	0.444195	0.000496755	0.0189381	0.140845	0	1.33039e+07	2.72274e+09	0.619803	1.42036e+08	1.13475	862000	0.01914	1.00311	0.789985	0.000599517	0.00990147	0.000624941
2021-03-19	4.02745e+08	0			0.22	1.92601e+07	1.36746e+08	2.85949e+09	1.12883e+06	0.787943		1	2021-03-19	0.381266		0.1	0.426489	0.000496745	0.0182329	0.140845	0	8.60811e+06	2.73135e+09	0.618734	1.36746e+08	1.13475	863000	0.01911	0.788964	0.787943	0.000599486	0.00989605	0.000624914
2021-03-20	4.03829e+08	0			0.65	1.91316e+07	1.35835e+08	2.86719e+09	1.08399e+06	0.786584		1	2021-03-20	0.382292		0.1	0.42249	0.000496735	0.0181113	0.140845	0	8.56308e+06	2.73992e+09	0.617708	1.35835e+08	1.13475	864000	0.01908	0.787263	0.786584	0.000599455	0.00989065	0.000624887
2021-03-21	4.04904e+08	0			0.65	1.90005e+07	1.34903e+08	2.87482e+09	1.0749e+06	1.20694		0	2021-03-21	0.383309		0.6	0.41845	0.000496724	0.0179871	0.140845	0.6	1.31064e+07	2.75302e+09	0.616691	1.34903e+08	1.13475	865000	0.01905	0.996763	0.786584	0.000599423	0.00988526	0.000624861
2021-03-22	4.06542e+08	0			0.65	1.87925e+07	1.33427e+08	2.88645e+09	1.63803e+06	0.783986		1	2021-03-22	0.38486		0.1	0.412741	0.000496714	0.0177903	0.140845	0	8.48269e+06	2.76151e+09	0.61514	1.33427e+08	1.13475	866000	0.01902	0.995464	0.783986	0.000599392	0.00987988	0.000624834
2021-03-23	4.07595e+08	0			0.65	1.86502e+07	1.32416e+08	2.89392e+09	1.05236e+06	0.782015		1	2021-03-23	0.385856		0.1	0.408497	0.000496703	0.0176555	0.140845	0	8.14389e+06	2.76965e+09	0.614144	1.32416e+08	1.13475	867000	0.01899	0.783	0.782015	0.000599361	0.00987453	0.000624808
2021-03-24	4.08636e+08	0			0.65	1.85449e+07	1.31669e+08	2.90132e+09	1.04176e+06	1.19998		0	2021-03-24	0.386842		0.6	0.405082	0.000496693	0.0175558	0.140845	0.6	1.2416e+07	2.78207e+09	0.613158	1.31669e+08	1.13475	868000	0.01896	0.990996	0.782015	0.000599329	0.00986918	0.000624781
2021-03-25	4.10226e+08	0			0.65	1.83857e+07	1.30538e+08	2.9126e+09	1.58953e+06	0.779494		1	2021-03-25	0.388347		0.1	0.400508	0.000496683	0.0174051	0.140845	0	1.26966e+07	2.79476e+09	0.611653	1.30538e+08	1.13475	869000	0.01893	0.989735	0.779494	0.000599298	0.00986385	0.000624754
2021-03-26	4.1125e+08	0			0.65	1.76211e+07	1.2511e+08	2.91987e+09	1.02368e+06	0.777581		1	2021-03-26	0.389316		0.1	0.382803	0.000496672	0.0166813	0.140845	0	8.17888e+06	2.80294e+09	0.610684	1.2511e+08	1.13475	870000	0.0189	0.778538	0.777581	0.000599267	0.00985854	0.000624728
2021-03-27	4.12228e+08	0			0.65	1.74479e+07	1.2388e+08	2.92682e+09	978703	1.19322		0	2021-03-27	0.390243		0.6	0.378004	0.000496662	0.0165173	0.140845	0.6	8.11593e+06	2.81106e+09	0.609757	1.2388e+08	1.13475	871000	0.01887	0.985399	0.777581	0.000599235	0.00985324	0.000624701
2021-03-28	4.13715e+08	0			0.65	1.77918e+07	1.26322e+08	2.93738e+09	1.48708e+06	1.19141		0	2021-03-28	0.39165		0.6	0.384402	0.000496651	0.016843	0.140845	0.6	1.2388e+07	2.82344e+09	0.60835	1.26322e+08	1.13475	872000	0.01884	1.19231	0.777581	0.000599204	0.00984796	0.000624674
2021-03-29	4.15229e+08	0			0.22	1.75611e+07	1.24684e+08	2.94813e+09	1.51409e+06	1.18866		0	2021-03-29	0.393084		0.6	0.378379	0.000496641	0.0166246	0.140845	0.6	7.9807e+06	2.83143e+09	0.606916	1.24684e+08	1.13475	873000	0.01881	1.19003	0.777581	0.000599173	0.00984269	0.000624648
2021-03-30	4.1672e+08	0			0	1.79281e+07	1.2729e+08	2.95871e+09	1.49101e+06	1.18585		0	2021-03-30	0.394495		0.6	0.385229	0.000496631	0.0169719	0.140845	0.6	7.89915e+06	2.83932e+09	0.605505	1.2729e+08	1.13475	874000	0.01878	1.18725	0.777581	0.000599141	0.00983744	0.000624621
2021-03-31	4.18239e+08	0			0.22	1.83341e+07	1.30172e+08	2.9695e+09	1.51858e+06	1.1831		0	2021-03-31	0.395933		0.6	0.392874	0.00049662	0.0173563	0.140845	0.6	1.20477e+07	2.85137e+09	0.604067	1.30172e+08	1.13475	875000	0.01875	1.18448	0.777581	0.00059911	0.0098322	0.000624595
2021-04-01	4.19788e+08	0			0	1.81866e+07	1.29125e+08	2.9805e+09	1.54936e+06	1.18029		0	2021-04-01	0.3974		0.6	0.388646	0.00049661	0.0172167	0.140845	0.6	8.01471e+06	2.85939e+09	0.6026	1.29125e+08	1.13475	876000	0.01872	1.18169	0.777581	0.000599079	0.00982698	0.000624568
2021-04-02	4.21322e+08	0			0.22	1.85911e+07	1.31997e+08	2.99138e+09	1.53325e+06	1.17742		0	2021-04-02	0.398851		0.6	0.396199	0.000496599	0.0175995	0.140845	0.6	7.69631e+06	2.86708e+09	0.601149	1.31997e+08	1.13475	877000	0.01869	1.17885	0.777581	0.000599048	0.00982177	0.000624541
2021-04-03	4.22885e+08	0			0	1.90706e+07	1.35401e+08	3.00248e+09	1.56354e+06	1.17459		0	2021-04-03	0.400331		0.6	0.405305	0.000496589	0.0180535	0.140845	0.6	7.63181e+06	2.87471e+09	0.599669	1.35401e+08	1.13475	878000	0.01866	1.176	0.777581	0.000599016	0.00981658	0.000624515
2021-04-04	4.24485e+08	0			0	1.95957e+07	1.3913e+08	3.01384e+09	1.6e+06	1.17169		0	2021-04-04	0.401846		0.6	0.415322	0.000496579	0.0185506	0.140845	0.6	1.163e+07	2.88634e+09	0.598154	1.3913e+08	1.13475	879000	0.01863	1.17314	0.777581	0.000598985	0.0098114	0.000624488
2021-04-05	4.26125e+08	0			0.22	1.95977e+07	1.39144e+08	3.02549e+09	1.64001e+06	0.760421		1	2021-04-05	0.403398		0.1	0.414224	0.000496568	0.0185525	0.140845	0	7.47178e+06	2.89382e+09	0.596602	1.39144e+08	1.13475	880000	0.0186	0.966057	0.760421	0.000598954	0.00980623	0.000624462
2021-04-06	4.2719e+08	0			0.65	1.96098e+07	1.3923e+08	3.03305e+09	1.06446e+06	0.758447		1	2021-04-06	0.404406		0.1	0.413341	0.000496558	0.0185639	0.140845	0	7.39652e+06	2.90121e+09	0.595594	1.3923e+08	1.13475	881000	0.01857	0.759434	0.758447	0.000598923	0.00980108	0.000624435
2021-04-07	4.28252e+08	0			0.65	1.96304e+07	1.39376e+08	3.04059e+09	1.06236e+06	0.757166		1	2021-04-07	0.405412		0.1	0.412639	0.000496548	0.0185834	0.140845	0	1.12857e+07	2.9125e+09	0.594588	1.39376e+08	1.13475	882000	0.01854	0.757806	0.757166	0.000598891	0.00979595	0.000624409
2021-04-08	4.29314e+08	0			0.65	1.91025e+07	1.35628e+08	3.04813e+09	1.06168e+06	0.755887		1	2021-04-08	0.406417		0.1	0.400439	0.000496537	0.0180837	0.140845	0	7.26814e+06	2.91977e+09	0.593583	1.35628e+08	1.13475	883000	0.01851	0.756527	0.755887	0.00059886	0.00979083	0.000624382
2021-04-09	4.30345e+08	0			0.65	1.91102e+07	1.35683e+08	3.05545e+09	1.03138e+06	0.75461		1	2021-04-09	0.407393		0.1	0.399499	0.000496527	0.018091	0.140845	0	6.94879e+06	2.92672e+09	0.592607	1.35683e+08	1.13475	884000	0.01848	0.755248	0.75461	0.000598829	0.00978572	0.000624355
2021-04-10	4.31375e+08	0			0.65	1.91616e+07	1.36047e+08	3.06276e+09	1.03005e+06	0.753368		1	2021-04-10	0.408368		0.1	0.39947	0.000496516	0.0181396	0.140845	0	1.05582e+07	2.93727e+09	0.591632	1.36047e+08	1.13475	885000	0.01845	0.753989	0.753368	0.000598798	0.00978063	0.000624329
2021-04-11	4.32406e+08	0			0.65	1.87056e+07	1.3281e+08	3.07008e+09	1.03112e+06	0.752129		1	2021-04-11	0.409345		0.1	0.388891	0.000496506	0.017708	0.140845	0	1.07501e+07	2.94802e+09	0.590655	1.3281e+08	1.13475	886000	0.01842	0.752749	0.752129	0.000598767	0.00977555	0.000624302
2021-04-12	4.33411e+08	0			0.65	1.81965e+07	1.29195e+08	3.07722e+09	1.00493e+06	0.750888		1	2021-04-12	0.410296		0.1	0.377264	0.000496496	0.017226	0.140845	0	1.05862e+07	2.95861e+09	0.589704	1.29195e+08	1.13475	887000	0.01839	0.751508	0.750888	0.000598735	0.00977048	0.000624276
2021-04-13	4.34387e+08	0			0.65	1.76814e+07	1.25538e+08	3.08415e+09	975964	1.15222		0	2021-04-13	0.41122		0.6	0.365575	0.000496485	0.0167384	0.140845	0.6	1.07819e+07	2.96939e+09	0.58878	1.25538e+08	1.13475	888000	0.01836	0.951556	0.750888	0.000598704	0.00976543	0.000624249
2021-04-14	4.35842e+08	0			0.65	1.7618e+07	1.25088e+08	3.09448e+09	1.45521e+06	1.15042		0	2021-04-14	0.412597		0.6	0.363261	0.000496475	0.0166784	0.140845	0.6	1.10005e+07	2.98039e+09	0.587403	1.25088e+08	1.13475	889000	0.01833	1.15132	0.750888	0.000598673	0.00976039	0.000624223
2021-04-15	4.3729e+08	0			0	1.75164e+07	1.24366e+08	3.10476e+09	1.44772e+06	1.14773		0	2021-04-15	0.413968		0.6	0.360169	0.000496465	0.0165822	0.140845	0.6	1.08861e+07	2.99128e+09	0.586032	1.24366e+08	1.13475	890000	0.0183	1.14907	0.750888	0.000598642	0.00975537	0.000624196
2021-04-16	4.38726e+08	0			0.22	1.74192e+07	1.23676e+08	3.11495e+09	1.436e+06	1.14505		0	2021-04-16	0.415327		0.6	0.357181	0.000496454	0.0164901	0.140845	0.6	1.11011e+07	3.00238e+09	0.584673	1.23676e+08	1.13475	891000	0.01827	1.14639	0.750888	0.000598611	0.00975036	0.00062417
2021-04-17	4.40151e+08	0			0	1.72803e+07	1.2269e+08	3.12507e+09	1.4247e+06	1.14239		0	2021-04-17	0.416676		0.6	0.353355	0.000496444	0.0163587	0.140845	0.6	1.136e+07	3.01374e+09	0.583324	1.2269e+08	1.13475	892000	0.01824	1.14372	0.750888	0.000598579	0.00974536	0.000624143
2021-04-18	4.41561e+08	0			0	1.70904e+07	1.21342e+08	3.13508e+09	1.41007e+06	1.13976		0	2021-04-18	0.418011		0.6	0.348506	0.000496434	0.0161789	0.140845	0.6	1.16441e+07	3.02538e+09	0.581989	1.21342e+08	1.13475	893000	0.01821	1.14108	0.750888	0.000598548	0.00974038	0.000624117
2021-04-19	4.42952e+08	0			0.22	1.68417e+07	1.19576e+08	3.14496e+09	1.39135e+06	1.13715		0	2021-04-19	0.419328		0.6	0.342486	0.000496423	0.0159435	0.140845	0.6	7.55769e+06	3.03294e+09	0.580672	1.19576e+08	1.13475	894000	0.01818	1.13845	0.750888	0.000598517	0.00973541	0.00062409
2021-04-20	4.4432e+08	0			0	1.71452e+07	1.21731e+08	3.15467e+09	1.36797e+06	1.13458		0	2021-04-20	0.420623		0.6	0.347694	0.000496413	0.0162308	0.140845	0.6	7.54273e+06	3.04048e+09	0.579377	1.21731e+08	1.13475	895000	0.01815	1.13586	0.750888	0.000598486	0.00973046	0.000624064
2021-04-21	4.4571e+08	0			0.22	1.74723e+07	1.24054e+08	3.16454e+09	1.38947e+06	1.13205		0	2021-04-21	0.421938		0.6	0.353347	0.000496403	0.0165405	0.140845	0.6	7.53789e+06	3.04802e+09	0.578062	1.24054e+08	1.13475	896000	0.01812	1.13331	0.750888	0.000598455	0.00972552	0.000624037
2021-04-22	4.47122e+08	0			0	1.78235e+07	1.26547e+08	3.17457e+09	1.41282e+06	0.734877		1	2021-04-22	0.423276		0.1	0.35945	0.000496392	0.0168729	0.140845	0	7.32282e+06	3.05535e+09	0.576724	1.26547e+08	1.13475	897000	0.01809	0.933462	0.734877	0.000598424	0.00972059	0.000624011
2021-04-23	4.48058e+08	0			0.65	1.77277e+07	1.25867e+08	3.18121e+09	935577	0.733177		1	2021-04-23	0.424162		0.1	0.356528	0.000496382	0.0167822	0.140845	0	7.31339e+06	3.06266e+09	0.575838	1.25867e+08	1.13475	898000	0.01806	0.734027	0.733177	0.000598393	0.00971568	0.000623984
2021-04-24	4.48986e+08	0			0.65	1.7626e+07	1.25145e+08	3.1878e+09	928395	0.732051		1	2021-04-24	0.42504		0.1	0.353501	0.000496371	0.016686	0.140845	0	7.32097e+06	3.06998e+09	0.57496	1.25145e+08	1.13475	899000	0.01803	0.732614	0.732051	0.000598362	0.00971077	0.000623958
2021-04-25	4.49908e+08	0			0.65	1.75166e+07	1.24368e+08	3.19435e+09	921654	0.730934		1	2021-04-25	0.425913		0.1	0.350331	0.000496361	0.0165823	0.140845	0	7.13501e+06	3.07711e+09	0.574087	1.24368e+08	1.13475	900000	0.018	0.731493	0.730934	0.000598331	0.00970589	0.000623932
2021-04-26	4.50823e+08	0			0.65	1.74262e+07	1.23726e+08	3.20084e+09	914531	0.729825		1	2021-04-26	0.426779		0.1	0.347556	0.000496351	0.0164968	0.140845	0	6.92935e+06	3.08404e+09	0.573221	1.23726e+08	1.13475	901000	0.01797	0.730379	0.729825	0.000598299	0.00970101	0.000623905
2021-04-27	4.51731e+08	0			0.65	1.73586e+07	1.23246e+08	3.20729e+09	908431	0.728724		1	2021-04-27	0.427639		0.1	0.345248	0.00049634	0.0164328	0.140845	0	1.0332e+07	3.09438e+09	0.572361	1.23246e+08	1.13475	902000	0.01794	0.729274	0.728724	0.000598268	0.00969615	0.000623879
2021-04-28	4.52635e+08	0			0.65	1.6807e+07	1.19329e+08	3.21371e+09	903546	0.727631		1	2021-04-28	0.428494		0.1	0.333347	0.00049633	0.0159106	0.140845	0	1.02788e+07	3.10465e+09	0.571506	1.19329e+08	1.13475	903000	0.01791	0.728177	0.727631	0.000598237	0.0096913	0.000623852
2021-04-29	4.53508e+08	0			0.65	1.62327e+07	1.15253e+08	3.21991e+09	873518	0.726543		1	2021-04-29	0.429321		0.1	0.321064	0.00049632	0.015367	0.140845	0	1.01956e+07	3.11485e+09	0.570679	1.15253e+08	1.13475	904000	0.01788	0.727087	0.726543	0.000598206	0.00968647	0.000623826
2021-04-30	4.5435e+08	0			0.65	1.56392e+07	1.11038e+08	3.22589e+09	842414	1.11505		0	2021-04-30	0.430118		0.6	0.308463	0.000496309	0.0148051	0.140845	0.6	1.01154e+07	3.12497e+09	0.569882	1.11038e+08	1.13475	905000	0.01785	0.920797	0.726543	0.000598175	0.00968164	0.000623799
2021-05-01	4.55596e+08	0			0.65	1.54601e+07	1.09766e+08	3.23473e+09	1.2456e+06	1.11349		0	2021-05-01	0.431298		0.6	0.304082	0.000496299	0.0146355	0.140845	0.6	1.00115e+07	3.13498e+09	0.568702	1.09766e+08	1.13475	906000	0.01782	1.11427	0.726543	0.000598144	0.00967684	0.000623773
2021-05-02	4.56826e+08	0			0	1.52796e+07	1.08485e+08	3.24346e+09	1.22962e+06	1.11119		0	2021-05-02	0.432462		0.6	0.299696	0.000496289	0.0144647	0.140845	0.6	9.87858e+06	3.14486e+09	0.567538	1.08485e+08	1.13475	907000	0.01779	1.11234	0.726543	0.000598113	0.00967204	0.000623747
2021-05-03	4.58038e+08	0			0.22	1.5101e+07	1.07217e+08	3.25207e+09	1.21275e+06	1.10891		0	2021-05-03	0.43361		0.6	0.295368	0.000496278	0.0142956	0.140845	0.6	9.71257e+06	3.15457e+09	0.56639	1.07217e+08	1.13475	908000	0.01776	1.11005	0.726543	0.000598082	0.00966726	0.00062372
2021-05-04	4.59235e+08	0			0	1.49292e+07	1.05997e+08	3.26057e+09	1.19612e+06	1.10667		0	2021-05-04	0.434742		0.6	0.291193	0.000496268	0.014133	0.140845	0.6	9.86523e+06	3.16443e+09	0.565258	1.05997e+08	1.13475	909000	0.01773	1.10779	0.726543	0.000598051	0.00966249	0.000623694
2021-05-05	4.60415e+08	0			0.22	1.47198e+07	1.04511e+08	3.26894e+09	1.18012e+06	1.10446		0	2021-05-05	0.435859		0.6	0.286309	0.000496258	0.0139348	0.140845	0.6	1.0031e+07	3.17446e+09	0.564141	1.04511e+08	1.13475	910000	0.0177	1.10556	0.726543	0.00059802	0.00965773	0.000623667
2021-05-06	4.61576e+08	0			0	1.44683e+07	1.02725e+08	3.27719e+09	1.16125e+06	1.10228		0	2021-05-06	0.436959		0.6	0.28063	0.000496247	0.0136966	0.140845	0.6	6.6426e+06	3.18111e+09	0.563041	1.02725e+08	1.13475	911000	0.01767	1.10337	0.726543	0.000597989	0.00965298	0.000623641
2021-05-07	4.62715e+08	0			0.22	1.46718e+07	1.0417e+08	3.28528e+09	1.13914e+06	1.10013		0	2021-05-07	0.438037		0.6	0.283784	0.000496237	0.0138893	0.140845	0.6	6.5916e+06	3.1877e+09	0.561963	1.0417e+08	1.13475	912000	0.01764	1.1012	0.726543	0.000597958	0.00964825	0.000623615
2021-05-08	4.63868e+08	0			0	1.48963e+07	1.05764e+08	3.29346e+09	1.15292e+06	1.09802		0	2021-05-08	0.439128		0.6	0.287322	0.000496227	0.0141019	0.140845	0.6	6.54374e+06	3.19424e+09	0.560872	1.05764e+08	1.13475	913000	0.01761	1.09907	0.726543	0.000597927	0.00964353	0.000623588
2021-05-09	4.65036e+08	0			0	1.5143e+07	1.07515e+08	3.30176e+09	1.16832e+06	0.713024		1	2021-05-09	0.440234		0.1	0.291263	0.000496216	0.0143354	0.140845	0	6.49317e+06	3.20074e+09	0.559766	1.07515e+08	1.13475	914000	0.01758	0.905522	0.713024	0.000597896	0.00963882	0.000623562
2021-05-10	4.65808e+08	0			0.65	1.49997e+07	1.06498e+08	3.30723e+09	771238	0.711618		1	2021-05-10	0.440964		0.1	0.287699	0.000496206	0.0141997	0.140845	0	6.44986e+06	3.20719e+09	0.559036	1.06498e+08	1.13475	915000	0.01755	0.712321	0.711618	0.000597865	0.00963413	0.000623535
2021-05-11	4.6657e+08	0			0.65	1.48537e+07	1.05461e+08	3.31265e+09	762434	0.71069		1	2021-05-11	0.441686		0.1	0.284102	0.000496196	0.0140615	0.140845	0	6.41518e+06	3.2136e+09	0.558314	1.05461e+08	1.13475	916000	0.01752	0.711154	0.71069	0.000597834	0.00962944	0.000623509
2021-05-12	4.67324e+08	0			0.65	1.47042e+07	1.044e+08	3.318e+09	754028	0.709772		1	2021-05-12	0.4424		0.1	0.280454	0.000496186	0.01392	0.140845	0	6.20198e+06	3.2198e+09	0.5576	1.044e+08	1.13475	917000	0.01749	0.710231	0.709772	0.000597803	0.00962477	0.000623483
2021-05-13	4.68069e+08	0			0.65	1.45762e+07	1.03491e+08	3.32329e+09	745474	0.708865		1	2021-05-13	0.443106		0.1	0.277233	0.000496175	0.0137988	0.140845	0	5.98114e+06	3.22578e+09	0.556894	1.03491e+08	1.13475	918000	0.01746	0.709319	0.708865	0.000597772	0.00962012	0.000623456
2021-05-14	4.68808e+08	0			0.65	1.44718e+07	1.0275e+08	3.32853e+09	738038	0.707968		1	2021-05-14	0.443804		0.1	0.274476	0.000496165	0.0137	0.140845	0	8.84379e+06	3.23463e+09	0.556196	1.0275e+08	1.13475	919000	0.01743	0.708416	0.707968	0.000597741	0.00961547	0.00062343
2021-05-15	4.69539e+08	0			0.65	1.3958e+07	9.91018e+07	3.33373e+09	731825	0.70708		1	2021-05-15	0.444497		0.1	0.263988	0.000496155	0.0132136	0.140845	0	8.73029e+06	3.24336e+09	0.555503	9.91018e+07	1.13475	920000	0.0174	0.707524	0.70708	0.00059771	0.00961084	0.000623404
2021-05-16	4.70244e+08	0			0.65	1.34333e+07	9.53767e+07	3.33873e+09	704958	0.706199		1	2021-05-16	0.445165		0.1	0.253352	0.000496144	0.0127169	0.140845	0	8.61054e+06	3.25197e+09	0.554835	9.53767e+07	1.13475	921000	0.01737	0.706639	0.706199	0.000597679	0.00960622	0.000623377
2021-05-17	4.70922e+08	0			0.65	1.28982e+07	9.15772e+07	3.34355e+09	677615	1.08409		0	2021-05-17	0.445806		0.6	0.242576	0.000496134	0.0122103	0.140845	0.6	8.49248e+06	3.26046e+09	0.554194	9.15772e+07	1.13475	922000	0.01734	0.895146	0.706199	0.000597649	0.00960161	0.000623351
2021-05-18	4.71921e+08	0			0.65	1.27009e+07	9.01761e+07	3.35064e+09	998776	1.08284		0	2021-05-18	0.446752		0.6	0.238193	0.000496124	0.0120235	0.140845	0.6	8.37885e+06	3.26884e+09	0.553248	9.01761e+07	1.13475	923000	0.01731	1.08347	0.706199	0.000597618	0.00959701	0.000623325
2021-05-19	4.72903e+08	0			0.22	1.25031e+07	8.87719e+07	3.35761e+09	982357	1.08099		0	2021-05-19	0.447682		0.6	0.233824	0.000496113	0.0118363	0.140845	0.6	8.24484e+06	3.27708e+09	0.552318	8.87719e+07	1.13475	924000	0.01728	1.08192	0.706199	0.000597587	0.00959243	0.000623298
2021-05-20	4.73868e+08	0			0	1.23073e+07	8.73815e+07	3.36447e+09	965411	1.07918		0	2021-05-20	0.448595		0.6	0.229514	0.000496103	0.0116509	0.140845	0.6	8.08791e+06	3.28517e+09	0.551405	8.73815e+07	1.13475	925000	0.01725	1.08008	0.706199	0.000597556	0.00958785	0.000623272
2021-05-21	4.74817e+08	0			0.22	1.21168e+07	8.60293e+07	3.3712e+09	948692	1.07739		0	2021-05-21	0.449494		0.6	0.225325	0.000496093	0.0114706	0.140845	0.6	8.18573e+06	3.29336e+09	0.550506	8.60293e+07	1.13475	926000	0.01722	1.07828	0.706199	0.000597525	0.00958329	0.000623246
2021-05-22	4.7575e+08	0			0	1.18964e+07	8.44641e+07	3.37782e+09	932466	1.07564		0	2021-05-22	0.450376		0.6	0.220602	0.000496082	0.0112619	0.140845	0.6	8.29508e+06	3.30165e+09	0.549624	8.44641e+07	1.13475	927000	0.01719	1.07651	0.706199	0.000597494	0.00957874	0.00062322
2021-05-23	4.76664e+08	0			0	1.1642e+07	8.26585e+07	3.38431e+09	914010	1.07391		0	2021-05-23	0.451242		0.6	0.215277	0.000496072	0.0110211	0.140845	0.6	5.47579e+06	3.30713e+09	0.548758	8.26585e+07	1.13475	928000	0.01716	1.07477	0.706199	0.000597463	0.00957421	0.000623193
2021-05-24	4.77557e+08	0			0.22	1.17638e+07	8.35233e+07	3.39065e+09	893037	1.07222		0	2021-05-24	0.452087		0.6	0.216916	0.000496062	0.0111364	0.140845	0.6	5.41328e+06	3.31254e+09	0.547913	8.35233e+07	1.13475	929000	0.01713	1.07307	0.706199	0.000597432	0.00956968	0.000623167
2021-05-25	4.78458e+08	0			0	1.19024e+07	8.45068e+07	3.39705e+09	900959	1.07057		0	2021-05-25	0.45294		0.6	0.21885	0.000496052	0.0112676	0.140845	0.6	5.3536e+06	3.3179e+09	0.54706	8.45068e+07	1.13475	930000	0.0171	1.07139	0.706199	0.000597402	0.00956517	0.000623141
2021-05-26	4.79368e+08	0			0.22	1.20585e+07	8.56154e+07	3.40351e+09	910164	0.695466		1	2021-05-26	0.453802		0.1	0.221094	0.000496041	0.0114154	0.140845	0	5.29286e+06	3.32319e+09	0.546198	8.56154e+07	1.13475	931000	0.01707	0.883017	0.695466	0.000597371	0.00956066	0.000623114
2021-05-27	4.79967e+08	0			0.65	1.1912e+07	8.45755e+07	3.40776e+09	599020	0.694371		1	2021-05-27	0.454369		0.1	0.217791	0.000496031	0.0112767	0.140845	0	5.24007e+06	3.32843e+09	0.545631	8.45755e+07	1.13475	932000	0.01704	0.694918	0.694371	0.00059734	0.00955617	0.000623088
2021-05-28	4.80558e+08	0			0.65	1.17648e+07	8.35302e+07	3.41196e+09	590812	0.69365		1	2021-05-28	0.454928		0.1	0.21449	0.000496021	0.0111374	0.140845	0	5.19596e+06	3.33362e+09	0.545072	8.35302e+07	1.13475	933000	0.01701	0.69401	0.69365	0.000597309	0.0095517	0.000623062
2021-05-29	4.81141e+08	0			0.65	1.16159e+07	8.24729e+07	3.4161e+09	582905	0.692939		1	2021-05-29	0.45548		0.1	0.211176	0.00049601	0.0109964	0.140845	0	5.0052e+06	3.33863e+09	0.54452	8.24729e+07	1.13475	934000	0.01698	0.693294	0.692939	0.000597278	0.00954723	0.000623036
2021-05-30	4.81715e+08	0			0.65	1.14859e+07	8.15497e+07	3.42018e+09	574936	0.692237		1	2021-05-30	0.456024		0.1	0.20822	0.000496	0.0108733	0.140845	0	4.81107e+06	3.34344e+09	0.543976	8.15497e+07	1.13475	935000	0.01695	0.692588	0.692237	0.000597247	0.00954277	0.000623009
2021-05-31	4.82283e+08	0			0.65	1.13762e+07	8.07709e+07	3.42421e+09	567925	1.06288		0	2021-05-31	0.456562		0.6	0.205647	0.00049599	0.0107695	0.140845	0.6	7.09131e+06	3.35053e+09	0.543438	8.07709e+07	1.13475	936000	0.01692	0.877556	0.692237	0.000597217	0.00953833	0.000622983
2021-06-01	4.83147e+08	0			0.65	1.12411e+07	7.98117e+07	3.43034e+09	863677	0.690862		1	2021-06-01	0.457379		0.1	0.202628	0.00049598	0.0106416	0.140845	0	6.97473e+06	3.35751e+09	0.542621	7.98117e+07	1.13475	937000	0.01689	0.876869	0.690862	0.000597186	0.0095339	0.000622957
2021-06-02	4.83702e+08	0			0.65	1.08135e+07	7.67755e+07	3.43428e+09	554717	0.689822		1	2021-06-02	0.457904		0.1	0.194365	0.000495969	0.0102367	0.140845	0	6.85442e+06	3.36436e+09	0.542096	7.67755e+07	1.13475	938000	0.01686	0.690342	0.689822	0.000597155	0.00952947	0.000622931
2021-06-03	4.84235e+08	0			0.65	1.03809e+07	7.3704e+07	3.43807e+09	532811	1.0592		0	2021-06-03	0.458409		0.6	0.186059	0.000495959	0.00982721	0.140845	0.6	6.73572e+06	3.3711e+09	0.541591	7.3704e+07	1.13475	939000	0.01683	0.874512	0.689822	0.000597124	0.00952506	0.000622904
2021-06-04	4.8502e+08	0			0.65	1.02175e+07	7.25446e+07	3.44364e+09	785387	1.05822		0	2021-06-04	0.459152		0.6	0.182611	0.000495949	0.00967261	0.140845	0.6	6.62051e+06	3.37772e+09	0.540848	7.25446e+07	1.13475	940000	0.0168	1.05871	0.689822	0.000597093	0.00952067	0.000622878
2021-06-05	4.85792e+08	0			0	1.00574e+07	7.14075e+07	3.44913e+09	772312	1.05676		0	2021-06-05	0.459883		0.6	0.179237	0.000495938	0.009521	0.140845	0.6	6.48947e+06	3.38421e+09	0.540117	7.14075e+07	1.13475	941000	0.01677	1.05749	0.689822	0.000597063	0.00951628	0.000622852
2021-06-06	4.86551e+08	0			0	9.90254e+06	7.03081e+07	3.45452e+09	759163	1.05533		0	2021-06-06	0.460602		0.6	0.175975	0.000495928	0.00937441	0.140845	0.6	6.34056e+06	3.39055e+09	0.539398	7.03081e+07	1.13475	942000	0.01674	1.05605	0.689822	0.000597032	0.0095119	0.000622826
2021-06-07	4.87298e+08	0			0.22	9.75597e+06	6.92674e+07	3.45982e+09	746464	1.05393		0	2021-06-07	0.461309		0.6	0.172876	0.000495918	0.00923565	0.140845	0.6	6.39681e+06	3.39694e+09	0.538691	6.92674e+07	1.13475	943000	0.01671	1.05463	0.689822	0.000597001	0.00950754	0.0006228
2021-06-08	4.88032e+08	0			0	9.58945e+06	6.80851e+07	3.46503e+09	734437	1.05255		0	2021-06-08	0.462004		0.6	0.169441	0.000495908	0.00907801	0.140845	0.6	6.46216e+06	3.40341e+09	0.537996	6.80851e+07	1.13475	944000	0.01668	1.05324	0.689822	0.00059697	0.00950318	0.000622773
2021-06-09	4.88753e+08	0			0.22	9.40024e+06	6.67417e+07	3.47015e+09	720955	1.05119		0	2021-06-09	0.462686		0.6	0.165623	0.000495897	0.0088989	0.140845	0.6	4.25304e+06	3.40766e+09	0.537314	6.67417e+07	1.13475	945000	0.01665	1.05187	0.689822	0.00059694	0.00949884	0.000622747
2021-06-10	4.89459e+08	0			0	9.50704e+06	6.75e+07	3.47516e+09	705818	1.04986		0	2021-06-10	0.463355		0.6	0.167026	0.000495887	0.009	0.140845	0.6	4.19477e+06	3.41185e+09	0.536645	6.75e+07	1.13475	946000	0.01662	1.05052	0.689822	0.000596909	0.00949451	0.000622721
2021-06-11	4.90172e+08	0			0.22	9.62916e+06	6.8367e+07	3.48022e+09	712931	1.04855		0	2021-06-11	0.46403		0.6	0.168688	0.000495877	0.0091156	0.140845	0.6	4.13862e+06	3.41599e+09	0.53597	6.8367e+07	1.13475	947000	0.01659	1.04921	0.689822	0.000596878	0.00949019	0.000622695
2021-06-12	4.90893e+08	0			0	9.76745e+06	6.93489e+07	3.48534e+09	721191	0.681368		1	2021-06-12	0.464712		0.1	0.170621	0.000495866	0.00924652	0.140845	0	4.08205e+06	3.42008e+09	0.535288	6.93489e+07	1.13475	948000	0.01656	0.86496	0.681368	0.000596848	0.00948588	0.000622669
2021-06-13	4.91369e+08	0			0.65	9.66788e+06	6.8642e+07	3.48872e+09	475373	0.6805		1	2021-06-13	0.465162		0.1	0.168398	0.000495856	0.00915226	0.140845	0	4.03227e+06	3.42411e+09	0.534838	6.8642e+07	1.13475	949000	0.01653	0.680934	0.6805	0.000596817	0.00948158	0.000622642
2021-06-14	4.91839e+08	0			0.65	9.56989e+06	6.79462e+07	3.49205e+09	469928	1.04502		0	2021-06-14	0.465607		0.6	0.166214	0.000495846	0.00905949	0.140845	0.6	6.13211e+06	3.43024e+09	0.534393	6.79462e+07	1.13475	950000	0.0165	0.86276	0.6805	0.000596786	0.00947729	0.000622616
2021-06-15	4.92553e+08	0			0.65	9.42055e+06	6.68859e+07	3.49713e+09	714337	1.04415		0	2021-06-15	0.466283		0.6	0.163151	0.000495836	0.00891812	0.140845	0.6	3.93849e+06	3.43418e+09	0.533717	6.68859e+07	1.13475	951000	0.01647	1.04459	0.6805	0.000596756	0.00947301	0.00062259
2021-06-16	4.93256e+08	0			0.22	9.56843e+06	6.79359e+07	3.50211e+09	702605	1.04283		0	2021-06-16	0.466949		0.6	0.165236	0.000495825	0.00905812	0.140845	0.6	3.78296e+06	3.43796e+09	0.533051	6.79359e+07	1.13475	952000	0.01644	1.04349	0.6805	0.000596725	0.00946874	0.000622564
2021-06-17	4.93968e+08	0			0	9.74835e+06	6.92133e+07	3.50717e+09	712732	1.04153		0	2021-06-17	0.467623		0.6	0.16786	0.000495815	0.00922844	0.140845	0.6	5.57625e+06	3.44354e+09	0.532377	6.92133e+07	1.13475	953000	0.01641	1.04218	0.6805	0.000596694	0.00946449	0.000622538
2021-06-18	4.94693e+08	0			0.22	9.6882e+06	6.87862e+07	3.51232e+09	725229	1.04021		0	2021-06-18	0.46831		0.6	0.166345	0.000495805	0.00917149	0.140845	0.6	5.48342e+06	3.44902e+09	0.53169	6.87862e+07	1.13475	954000	0.01638	1.04087	0.6805	0.000596664	0.00946024	0.000622512
2021-06-19	4.95413e+08	0			0	9.63573e+06	6.84137e+07	3.51743e+09	719841	1.03887		0	2021-06-19	0.468991		0.6	0.164968	0.000495795	0.00912182	0.140845	0.6	5.39006e+06	3.45441e+09	0.531009	6.84137e+07	1.13475	955000	0.01635	1.03954	0.6805	0.000596633	0.00945601	0.000622486
2021-06-20	4.96128e+08	0			0	9.59158e+06	6.81002e+07	3.52251e+09	715019	1.03754		0	2021-06-20	0.469668		0.6	0.163739	0.000495784	0.00908003	0.140845	0.6	5.2999e+06	3.45971e+09	0.530332	6.81002e+07	1.13475	956000	0.01632	1.0382	0.6805	0.000596602	0.00945178	0.000622459
2021-06-21	4.96839e+08	0			0.22	9.55595e+06	6.78472e+07	3.52756e+09	710831	1.03622		0	2021-06-21	0.470341		0.6	0.162661	0.000495774	0.0090463	0.140845	0.6	5.2145e+06	3.46493e+09	0.529659	6.78472e+07	1.13475	957000	0.01629	1.03688	0.6805	0.000596572	0.00944757	0.000622433
2021-06-22	4.97546e+08	0			0	9.5288e+06	6.76545e+07	3.53258e+09	707288	1.0349		0	2021-06-22	0.471011		0.6	0.161731	0.000495764	0.0090206	0.140845	0.6	5.11878e+06	3.47004e+09	0.528989	6.76545e+07	1.13475	958000	0.01626	1.03556	0.6805	0.000596541	0.00944337	0.000622407
2021-06-23	4.98251e+08	0			0.22	9.51223e+06	6.75368e+07	3.53758e+09	704384	1.03359		0	2021-06-23	0.471677		0.6	0.160984	0.000495754	0.00900491	0.140845	0.6	5.01131e+06	3.47506e+09	0.528323	6.75368e+07	1.13475	959000	0.01623	1.03425	0.6805	0.00059651	0.00943918	0.000622381
2021-06-24	4.98953e+08	0			0	9.50868e+06	6.75116e+07	3.54257e+09	702270	1.03229		0	2021-06-24	0.472342		0.6	0.160459	0.000495743	0.00900155	0.140845	0.6	5.06181e+06	3.48012e+09	0.527658	6.75116e+07	1.13475	960000	0.0162	1.03294	0.6805	0.00059648	0.00943499	0.000622355
2021-06-25	4.99654e+08	0			0.22	9.49687e+06	6.74278e+07	3.54754e+09	701123	1.03099		0	2021-06-25	0.473006		0.6	0.159796	0.000495733	0.00899037	0.140845	0.6	5.12046e+06	3.48524e+09	0.526994	6.74278e+07	1.13475	961000	0.01617	1.03164	0.6805	0.000596449	0.00943082	0.000622329
2021-06-26	5.00354e+08	0			0	9.47505e+06	6.72729e+07	3.55251e+09	699371	1.02969		0	2021-06-26	0.473668		0.6	0.158968	0.000495723	0.00896972	0.140845	0.6	3.37515e+06	3.48861e+09	0.526332	6.72729e+07	1.13475	962000	0.01614	1.03034	0.6805	0.000596419	0.00942666	0.000622303
2021-06-27	5.0105e+08	0			0	9.69656e+06	6.88456e+07	3.55746e+09	696886	1.0284		0	2021-06-27	0.474328		0.6	0.162214	0.000495713	0.00917941	0.140845	0.6	3.33649e+06	3.49195e+09	0.525672	6.88456e+07	1.13475	963000	0.01611	1.02905	0.6805	0.000596388	0.00942251	0.000622277
2021-06-28	5.01763e+08	0			0.22	9.93892e+06	7.05663e+07	3.56252e+09	712283	1.02711		0	2021-06-28	0.475002		0.6	0.165786	0.000495702	0.00940884	0.140845	0.6	5.0718e+06	3.49702e+09	0.524998	7.05663e+07	1.13475	964000	0.01608	1.02776	0.6805	0.000596357	0.00941837	0.000622251
2021-06-29	5.02492e+08	0			0	9.95375e+06	7.06716e+07	3.56769e+09	729170	1.02579		0	2021-06-29	0.475692		0.6	0.165552	0.000495692	0.00942288	0.140845	0.6	4.9885e+06	3.50201e+09	0.524308	7.06716e+07	1.13475	965000	0.01605	1.02645	0.6805	0.000596327	0.00941424	0.000622225
2021-06-30	5.03221e+08	0			0.22	9.98047e+06	7.08613e+07	3.57287e+09	729322	1.02445		0	2021-06-30	0.476383		0.6	0.165515	0.000495682	0.00944818	0.140845	0.6	5.0604e+06	3.50707e+09	0.523617	7.08613e+07	1.13475	966000	0.01602	1.02512	0.6805	0.000596296	0.00941012	0.000622199
2021-07-01	5.03952e+08	0			0	9.99805e+06	7.09862e+07	3.57806e+09	730318	1.0231		0	2021-07-01	0.477074		0.6	0.165325	0.000495672	0.00946482	0.140845	0.6	5.14913e+06	3.51222e+09	0.522926	7.09862e+07	1.13475	967000	0.01599	1.02377	0.6805	0.000596266	0.00940601	0.000622172
2021-07-02	5.04682e+08	0			0.22	1.00035e+07	7.10246e+07	3.58324e+09	730641	1.02175		0	2021-07-02	0.477766		0.6	0.164933	0.000495661	0.00946995	0.140845	0.6	5.11087e+06	3.51733e+09	0.522234	7.10246e+07	1.13475	968000	0.01596	1.02242	0.6805	0.000596235	0.00940191	0.000622146
2021-07-03	5.05412e+08	0			0	1.00137e+07	7.10972e+07	3.58843e+09	730071	1.02039		0	2021-07-03	0.478457		0.6	0.164621	0.000495651	0.00947963	0.140845	0.6	5.07664e+06	3.52241e+09	0.521543	7.10972e+07	1.13475	969000	0.01593	1.02107	0.6805	0.000596205	0.00939782	0.00062212
2021-07-04	5.06142e+08	0			0	1.00285e+07	7.12025e+07	3.59361e+09	729851	1.01904		0	2021-07-04	0.479148		0.6	0.164385	0.000495641	0.00949367	0.140845	0.6	5.0469e+06	3.52745e+09	0.520852	7.12025e+07	1.13475	970000	0.0159	1.01972	0.6805	0.000596174	0.00939374	0.000622094
2021-07-05	5.06872e+08	0			0.22	1.00477e+07	7.13384e+07	3.59879e+09	729965	1.01769		0	2021-07-05	0.479839		0.6	0.164219	0.000495631	0.00951179	0.140845	0.6	5.02174e+06	3.53248e+09	0.520161	7.13384e+07	1.13475	971000	0.01587	1.01837	0.6805	0.000596144	0.00938967	0.000622068
2021-07-06	5.07602e+08	0			0	1.00708e+07	7.15024e+07	3.60398e+09	730389	1.01634		0	2021-07-06	0.48053		0.6	0.164116	0.00049562	0.00953365	0.140845	0.6	5.00112e+06	3.53748e+09	0.51947	7.15024e+07	1.13475	972000	0.01584	1.01702	0.6805	0.000596113	0.00938561	0.000622042
2021-07-07	5.08334e+08	0			0.22	1.00975e+07	7.16921e+07	3.60917e+09	731097	1.01499		0	2021-07-07	0.481222		0.6	0.164071	0.00049561	0.00955894	0.140845	0.6	4.98611e+06	3.54246e+09	0.518778	7.16921e+07	1.13475	973000	0.01581	1.01567	0.6805	0.000596083	0.00938156	0.000622016
2021-07-08	5.09066e+08	0			0	1.01273e+07	7.19036e+07	3.61437e+09	732062	1.01364		0	2021-07-08	0.481915		0.6	0.164074	0.0004956	0.00958715	0.140845	0.6	4.97797e+06	3.54744e+09	0.518085	7.19036e+07	1.13475	974000	0.01578	1.01432	0.6805	0.000596052	0.00937752	0.00062199
2021-07-09	5.09799e+08	0			0.22	1.01594e+07	7.21317e+07	3.61957e+09	733243	1.01229		0	2021-07-09	0.48261		0.6	0.164113	0.00049559	0.00961755	0.140845	0.6	4.96553e+06	3.55241e+09	0.51739	7.21317e+07	1.13475	975000	0.01575	1.01296	0.6805	0.000596022	0.00937349	0.000621964
2021-07-10	5.10533e+08	0			0	1.01946e+07	7.23817e+07	3.62479e+09	734586	1.01093		0	2021-07-10	0.483305		0.6	0.1642	0.00049558	0.00965089	0.140845	0.6	4.94789e+06	3.55735e+09	0.516695	7.23817e+07	1.13475	976000	0.01572	1.01161	0.6805	0.000595991	0.00936947	0.000621938
2021-07-11	5.1127e+08	0			0	1.02339e+07	7.26604e+07	3.63001e+09	736145	1.00957		0	2021-07-11	0.484002		0.6	0.164349	0.000495569	0.00968806	0.140845	0.6	5.05721e+06	3.56241e+09	0.515998	7.26604e+07	1.13475	977000	0.01569	1.01025	0.6805	0.000595961	0.00936546	0.000621912
2021-07-12	5.12008e+08	0			0.22	1.02596e+07	7.28429e+07	3.63525e+09	737987	1.00821		0	2021-07-12	0.484701		0.6	0.164279	0.000495559	0.00971239	0.140845	0.6	5.17711e+06	3.56759e+09	0.515299	7.28429e+07	1.13475	978000	0.01566	1.00889	0.6805	0.00059593	0.00936146	0.000621886
2021-07-13	5.12746e+08	0			0	1.02692e+07	7.29116e+07	3.6405e+09	738842	1.00684		0	2021-07-13	0.4854		0.6	0.163951	0.000495549	0.00972155	0.140845	0.6	5.17818e+06	3.57277e+09	0.5146	7.29116e+07	1.13475	979000	0.01563	1.00753	0.6805	0.0005959	0.00935746	0.00062186
2021-07-14	5.13485e+08	0			0.22	1.02785e+07	7.2977e+07	3.64574e+09	738538	1.00548		0	2021-07-14	0.486099		0.6	0.163616	0.000495539	0.00973027	0.140845	0.6	5.18525e+06	3.57795e+09	0.513901	7.2977e+07	1.13475	980000	0.0156	1.00616	0.6805	0.000595869	0.00935348	0.000621834
2021-07-15	5.14223e+08	0			0	1.02863e+07	7.3033e+07	3.65098e+09	738197	1.00411		0	2021-07-15	0.486798		0.6	0.16326	0.000495528	0.00973773	0.140845	0.6	5.18755e+06	3.58314e+09	0.513202	7.3033e+07	1.13475	981000	0.01557	1.00479	0.6805	0.000595839	0.00934951	0.000621808
2021-07-16	5.14961e+08	0			0.22	1.02935e+07	7.30835e+07	3.65622e+09	737759	1.00275		0	2021-07-16	0.487496		0.6	0.162892	0.000495518	0.00974447	0.140845	0.6	5.18351e+06	3.58832e+09	0.512504	7.30835e+07	1.13475	982000	0.01554	1.00343	0.6805	0.000595808	0.00934555	0.000621782
2021-07-17	5.15698e+08	0			0	1.03006e+07	7.31346e+07	3.66146e+09	737266	1.00138		0	2021-07-17	0.488194		0.6	0.162526	0.000495508	0.00975128	0.140845	0.6	5.18194e+06	3.5935e+09	0.511806	7.31346e+07	1.13475	983000	0.01551	1.00206	0.6805	0.000595778	0.0093416	0.000621756
2021-07-18	5.16435e+08	0			0	1.03076e+07	7.31838e+07	3.66669e+09	736777	1.00002		0	2021-07-18	0.488892		0.6	0.162156	0.000495498	0.00975784	0.140845	0.6	5.18275e+06	3.59869e+09	0.511108	7.31838e+07	1.13475	984000	0.01548	1.0007	0.6805	0.000595748	0.00933765	0.00062173
2021-07-19	5.17171e+08	0			0.22	1.03139e+07	7.32285e+07	3.67192e+09	736268	0.998655		0	2021-07-19	0.489589		0.6	0.161776	0.000495488	0.0097638	0.140845	0.6	5.18576e+06	3.60387e+09	0.510411	7.32285e+07	1.13475	985000	0.01545	0.999337	0.6805	0.000595717	0.00933372	0.000621704
2021-07-20	5.17907e+08	0			0.65	1.03192e+07	7.32663e+07	3.67714e+09	735715	0.997293		0	2021-07-20	0.490285		0.6	0.161381	0.000495477	0.00976884	0.140845	0.6	5.19079e+06	3.60906e+09	0.509715	7.32663e+07	1.13475	986000	0.01542	0.997974	0.6805	0.000595687	0.0093298	0.000621678
2021-07-21	5.18642e+08	0			0.65	1.03232e+07	7.32947e+07	3.68236e+09	735091	0.995932		0	2021-07-21	0.490981		0.6	0.160967	0.000495467	0.00977263	0.140845	0.6	5.19764e+06	3.61426e+09	0.509019	7.32947e+07	1.13475	987000	0.01539	0.996613	0.6805	0.000595656	0.00932588	0.000621652
2021-07-22	5.19376e+08	0			0.65	1.03255e+07	7.33111e+07	3.68757e+09	734372	0.994573		0	2021-07-22	0.491676		0.6	0.160526	0.000495457	0.00977481	0.140845	0.6	5.20603e+06	3.61947e+09	0.508324	7.33111e+07	1.13475	988000	0.01536	0.995253	0.6805	0.000595626	0.00932198	0.000621626
2021-07-23	5.2011e+08	0			0.65	1.03258e+07	7.33132e+07	3.69278e+09	733533	0.993214		0	2021-07-23	0.492371		0.6	0.160055	0.000495447	0.00977509	0.140845	0.6	5.21556e+06	3.62468e+09	0.507629	7.33132e+07	1.13475	989000	0.01533	0.993894	0.6805	0.000595596	0.00931808	0.0006216
2021-07-24	5.20843e+08	0			0.65	1.03238e+07	7.32987e+07	3.69798e+09	732552	0.991858		0	2021-07-24	0.493064		0.6	0.159549	0.000495437	0.00977316	0.140845	0.6	5.22663e+06	3.62991e+09	0.506936	7.32987e+07	1.13475	990000	0.0153	0.992536	0.6805	0.000595565	0.00931419	0.000621574
2021-07-25	5.21574e+08	0			0.65	1.0319e+07	7.32651e+07	3.70317e+09	731407	0.990503		0	2021-07-25	0.493757		0.6	0.159003	0.000495426	0.00976868	0.140845	0.6	5.2397e+06	3.63515e+09	0.506243	7.32651e+07	1.13475	991000	0.01527	0.99118	0.6805	0.000595535	0.00931032	0.000621549
2021-07-26	5.22304e+08	0			0.65	1.03111e+07	7.32089e+07	3.70836e+09	730073	0.98915		0	2021-07-26	0.494448		0.6	0.158409	0.000495416	0.00976118	0.140845	0.6	5.24578e+06	3.6404e+09	0.505552	7.32089e+07	1.13475	992000	0.01524	0.989826	0.6805	0.000595505	0.00930645	0.000621523
2021-07-27	5.23033e+08	0			0.65	1.03008e+07	7.31356e+07	3.71353e+09	728517	0.987799		0	2021-07-27	0.495137		0.6	0.157779	0.000495406	0.00975141	0.140845	0.6	5.24362e+06	3.64564e+09	0.504863	7.31356e+07	1.13475	993000	0.01521	0.988475	0.6805	0.000595474	0.00930259	0.000621497
2021-07-28	5.23759e+08	0			0.65	1.0289e+07	7.30522e+07	3.71869e+09	726793	0.986452		0	2021-07-28	0.495825		0.6	0.15713	0.000495396	0.00974029	0.140845	0.6	5.2412e+06	3.65088e+09	0.504175	7.30522e+07	1.13475	994000	0.01518	0.987126	0.6805	0.000595444	0.00929874	0.000621471
2021-07-29	5.24484e+08	0			0.65	1.02758e+07	7.29583e+07	3.72384e+09	724974	0.985107		0	2021-07-29	0.496512		0.6	0.156461	0.000495386	0.00972777	0.140845	0.6	5.23809e+06	3.65612e+09	0.503488	7.29583e+07	1.13475	995000	0.01515	0.98578	0.6805	0.000595414	0.0092949	0.000621445
2021-07-30	5.25207e+08	0			0.65	1.02611e+07	7.28539e+07	3.72897e+09	723056	0.983766		0	2021-07-30	0.497196		0.6	0.155771	0.000495375	0.00971386	0.140845	0.6	5.23459e+06	3.66135e+09	0.502804	7.28539e+07	1.13475	996000	0.01512	0.984437	0.6805	0.000595383	0.00929107	0.000621419
2021-07-31	5.25928e+08	0			0.65	1.02449e+07	7.27387e+07	3.73409e+09	721039	0.982429		0	2021-07-31	0.497879		0.6	0.155061	0.000495365	0.00969849	0.140845	0.6	5.23112e+06	3.66658e+09	0.502121	7.27387e+07	1.13475	997000	0.01509	0.983098	0.6805	0.000595353	0.00928724	0.000621393
2021-08-01	5.26647e+08	0			0.65	1.0227e+07	7.26119e+07	3.7392e+09	718920	0.981095		0	2021-08-01	0.498559		0.6	0.154328	0.000495355	0.00968159	0.140845	0.6	5.22751e+06	3.67181e+09	0.501441	7.26119e+07	1.13475	998000	0.01506	0.981762	0.6805	0.000595323	0.00928343	0.000621367
2021-08-02	5.27364e+08	0			0.65	1.02075e+07	7.24729e+07	3.74428e+09	716692	0.979766		0	2021-08-02	0.499238		0.6	0.153572	0.000495345	0.00966306	0.140845	0.6	5.22357e+06	3.67703e+09	0.500762	7.24729e+07	1.13475	999000	0.01503	0.98043	0.6805	0.000595292	0.00927963	0.000621341
2021-08-03	5.28078e+08	0			0.65	1.01861e+07	7.23212e+07	3.74936e+09	714351	0.97844		0	2021-08-03	0.499914		0.6	0.152791	0.000495335	0.00964283	0.140845	0.6	5.21914e+06	3.68225e+09	0.500086	7.23212e+07	1.13475	1000000	0.015	0.979103	0.6805	0.000595262	0.00927583	0.000621315
2021-08-04	5.2879e+08	0			0.65	1.01629e+07	7.21565e+07	3.75441e+09	711891	0.977119		0	2021-08-04	0.500588		0.6	0.151986	0.000495324	0.00962087	0.140845	0.6	5.21404e+06	3.68747e+09	0.499412	7.21565e+07	1.13475	1001000	0.01497	0.977779	0.6805	0.000595232	0.00927205	0.00062129
2021-08-05	5.295e+08	0			0.65	1.01378e+07	7.19786e+07	3.75945e+09	709311	0.975802		0	2021-08-05	0.50126		0.6	0.151157	0.000495314	0.00959715	0.140845	0.6	5.20809e+06	3.69268e+09	0.49874	7.19786e+07	1.13475	1002000	0.01494	0.97646	0.6805	0.000595201	0.00926827	0.000621264
2021-08-06	5.30206e+08	0			0.65	1.01109e+07	7.17874e+07	3.76446e+09	706608	0.97449		0	2021-08-06	0.501928		0.6	0.150303	0.000495304	0.00957166	0.140845	0.6	5.20112e+06	3.69788e+09	0.498072	7.17874e+07	1.13475	1003000	0.01491	0.975146	0.6805	0.000595171	0.0092645	0.000621238
2021-08-07	5.3091e+08	0			0.65	1.00821e+07	7.15832e+07	3.76946e+09	703784	0.973183		0	2021-08-07	0.502595		0.6	0.149424	0.000495294	0.00954442	0.140845	0.6	5.19299e+06	3.70307e+09	0.497405	7.15832e+07	1.13475	1004000	0.01488	0.973836	0.6805	0.000595141	0.00926074	0.000621212
2021-08-08	5.31611e+08	0			0.65	1.00516e+07	7.13661e+07	3.77444e+09	700840	0.971881		0	2021-08-08	0.503258		0.6	0.148523	0.000495284	0.00951548	0.140845	0.6	5.18352e+06	3.70825e+09	0.496742	7.13661e+07	1.13475	1005000	0.01485	0.972532	0.6805	0.000595111	0.00925699	0.000621186
2021-08-09	5.32309e+08	0			0.65	1.00193e+07	7.11369e+07	3.77939e+09	697781	0.970585		0	2021-08-09	0.503919		0.6	0.1476	0.000495273	0.00948491	0.140845	0.6	5.17247e+06	3.71343e+09	0.496081	7.11369e+07	1.13475	1006000	0.01482	0.971233	0.6805	0.00059508	0.00925325	0.00062116
2021-08-10	5.33003e+08	0			0.65	9.98537e+06	7.08961e+07	3.78432e+09	694611	0.969294		0	2021-08-10	0.504576		0.6	0.146657	0.000495263	0.00945282	0.140845	0.6	5.16023e+06	3.71859e+09	0.495424	7.08961e+07	1.13475	1007000	0.01479	0.969939	0.6805	0.00059505	0.00924951	0.000621134
2021-08-11	5.33695e+08	0			0.65	9.94992e+06	7.06444e+07	3.78923e+09	691340	0.968009		0	2021-08-11	0.505231		0.6	0.145695	0.000495253	0.00941925	0.140845	0.6	5.14732e+06	3.72373e+09	0.494769	7.06444e+07	1.13475	1008000	0.01476	0.968652	0.6805	0.00059502	0.00924579	0.000621109
2021-08-12	5.34382e+08	0			0.65	9.91291e+06	7.03817e+07	3.79412e+09	687972	0.96673		0	2021-08-12	0.505882		0.6	0.144715	0.000495243	0.00938423	0.140845	0.6	5.1337e+06	3.72887e+09	0.494118	7.03817e+07	1.13475	1009000	0.01473	0.96737	0.6805	0.00059499	0.00924207	0.000621083
2021-08-13	5.35067e+08	0			0.65	9.87437e+06	7.0108e+07	3.79898e+09	684508	0.965458		0	2021-08-13	0.50653		0.6	0.143716	0.000495233	0.00934773	0.140845	0.6	5.11937e+06	3.73399e+09	0.49347	7.0108e+07	1.13475	1010000	0.0147	0.966094	0.6805	0.000594959	0.00923837	0.000621057
2021-08-14	5.35748e+08	0			0.65	9.83428e+06	6.98234e+07	3.80381e+09	680949	0.964192		0	2021-08-14	0.507175		0.6	0.142699	0.000495223	0.00930978	0.140845	0.6	5.10433e+06	3.73909e+09	0.492825	6.98234e+07	1.13475	1011000	0.01467	0.964825	0.6805	0.000594929	0.00923467	0.000621031
2021-08-15	5.36425e+08	0			0.65	9.79265e+06	6.95278e+07	3.80862e+09	677295	0.962932		0	2021-08-15	0.507816		0.6	0.141664	0.000495212	0.00927038	0.140845	0.6	5.08852e+06	3.74418e+09	0.492184	6.95278e+07	1.13475	1012000	0.01464	0.963562	0.6805	0.000594899	0.00923098	0.000621005
2021-08-16	5.37099e+08	0			0.65	9.74951e+06	6.92215e+07	3.8134e+09	673547	0.961679		0	2021-08-16	0.508454		0.6	0.140612	0.000495202	0.00922953	0.140845	0.6	5.07189e+06	3.74925e+09	0.491546	6.92215e+07	1.13475	1013000	0.01461	0.962306	0.6805	0.000594869	0.0092273	0.00062098
2021-08-17	5.37768e+08	0			0.65	9.70486e+06	6.89045e+07	3.81816e+09	669707	0.960434		0	2021-08-17	0.509087		0.6	0.139543	0.000495192	0.00918727	0.140845	0.6	5.05443e+06	3.75431e+09	0.490913	6.89045e+07	1.13475	1014000	0.01458	0.961056	0.6805	0.000594839	0.00922363	0.000620954
2021-08-18	5.38434e+08	0			0.65	9.65875e+06	6.85771e+07	3.82288e+09	665777	0.959195		0	2021-08-18	0.509718		0.6	0.138458	0.000495182	0.00914362	0.140845	0.6	5.03611e+06	3.75934e+09	0.490282	6.85771e+07	1.13475	1015000	0.01455	0.959814	0.6805	0.000594809	0.00921996	0.000620928
2021-08-19	5.39096e+08	0			0.65	9.6112e+06	6.82395e+07	3.82758e+09	661759	0.957963		0	2021-08-19	0.510344		0.6	0.137357	0.000495172	0.0090986	0.140845	0.6	5.01692e+06	3.76436e+09	0.489656	6.82395e+07	1.13475	1016000	0.01452	0.958579	0.6805	0.000594778	0.00921631	0.000620902
2021-08-20	5.39754e+08	0			0.65	9.56225e+06	6.78919e+07	3.83225e+09	657655	0.956739		0	2021-08-20	0.510967		0.6	0.136241	0.000495162	0.00905226	0.140845	0.6	4.99686e+06	3.76936e+09	0.489033	6.78919e+07	1.13475	1017000	0.01449	0.957351	0.6805	0.000594748	0.00921266	0.000620876
2021-08-21	5.40407e+08	0			0.65	9.51193e+06	6.75347e+07	3.83689e+09	653470	0.955523		0	2021-08-21	0.511585		0.6	0.135111	0.000495151	0.00900463	0.140845	0.6	4.97596e+06	3.77433e+09	0.488415	6.75347e+07	1.13475	1018000	0.01446	0.956131	0.6805	0.000594718	0.00920902	0.000620851
2021-08-22	5.41056e+08	0			0.65	9.4603e+06	6.71681e+07	3.8415e+09	649205	0.954314		0	2021-08-22	0.5122		0.6	0.133967	0.000495141	0.00895575	0.140845	0.6	4.95424e+06	3.77929e+09	0.4878	6.71681e+07	1.13475	1019000	0.01443	0.954918	0.6805	0.000594688	0.00920539	0.000620825
2021-08-23	5.41701e+08	0			0.65	9.40738e+06	6.67924e+07	3.84608e+09	644864	0.953113		0	2021-08-23	0.51281		0.6	0.13281	0.000495131	0.00890565	0.140845	0.6	4.93174e+06	3.78422e+09	0.48719	6.67924e+07	1.13475	1020000	0.0144	0.953714	0.6805	0.000594658	0.00920177	0.000620799
2021-08-24	5.42342e+08	0			0.65	9.35322e+06	6.64078e+07	3.85063e+09	640450	0.95192		0	2021-08-24	0.513417		0.6	0.131641	0.000495121	0.00885438	0.140845	0.6	4.90851e+06	3.78913e+09	0.486583	6.64078e+07	1.13475	1021000	0.01437	0.952517	0.6805	0.000594628	0.00919815	0.000620773
2021-08-25	5.42978e+08	0			0.65	9.29784e+06	6.60147e+07	3.85514e+09	635966	0.950736		0	2021-08-25	0.514019		0.6	0.130461	0.000495111	0.00880196	0.140845	0.6	4.8846e+06	3.79401e+09	0.485981	6.60147e+07	1.13475	1022000	0.01434	0.951328	0.6805	0.000594598	0.00919455	0.000620748
2021-08-26	5.43609e+08	0			0.65	9.24128e+06	6.56131e+07	3.85962e+09	631414	0.949559		0	2021-08-26	0.514617		0.6	0.12927	0.000495101	0.00874842	0.140845	0.6	4.86001e+06	3.79887e+09	0.485383	6.56131e+07	1.13475	1023000	0.01431	0.950148	0.6805	0.000594567	0.00919095	0.000620722
2021-08-27	5.44236e+08	0			0.65	9.18357e+06	6.52034e+07	3.86407e+09	626796	0.948392		0	2021-08-27	0.51521		0.6	0.128068	0.00049509	0.00869378	0.140845	0.6	4.83474e+06	3.80371e+09	0.48479	6.52034e+07	1.13475	1024000	0.01428	0.948975	0.6805	0.000594537	0.00918736	0.000620696
2021-08-28	5.44858e+08	0			0.65	9.12474e+06	6.47857e+07	3.86849e+09	622116	0.947232		0	2021-08-28	0.515799		0.6	0.126856	0.00049508	0.00863809	0.140845	0.6	4.80879e+06	3.80851e+09	0.484201	6.47857e+07	1.13475	1025000	0.01425	0.947812	0.6805	0.000594507	0.00918378	0.00062067
2021-08-29	5.45475e+08	0			0.65	9.06482e+06	6.43602e+07	3.87287e+09	617375	0.946081		0	2021-08-29	0.516383		0.6	0.125635	0.00049507	0.00858136	0.140845	0.6	4.78218e+06	3.8133e+09	0.483617	6.43602e+07	1.13475	1026000	0.01422	0.946657	0.6805	0.000594477	0.00918021	0.000620645
2021-08-30	5.46088e+08	0			0.65	9.00385e+06	6.39273e+07	3.87722e+09	612576	0.944939		0	2021-08-30	0.516963		0.6	0.124406	0.00049506	0.00852364	0.140845	0.6	4.75492e+06	3.81805e+09	0.483037	6.39273e+07	1.13475	1027000	0.01419	0.94551	0.6805	0.000594447	0.00917664	0.000620619
2021-08-31	5.46696e+08	0			0.65	8.94186e+06	6.34872e+07	3.88154e+09	607721	0.943806		0	2021-08-31	0.517539		0.6	0.123168	0.00049505	0.00846496	0.140845	0.6	4.72702e+06	3.82278e+09	0.482461	6.34872e+07	1.13475	1028000	0.01416	0.944373	0.6805	0.000594417	0.00917309	0.000620593
2021-09-01	5.47298e+08	0			0.65	8.8789e+06	6.30402e+07	3.88582e+09	602813	0.942682		0	2021-09-01	0.518109		0.6	0.121923	0.00049504	0.00840536	0.140845	0.6	4.69849e+06	3.82748e+09	0.481891	6.30402e+07	1.13475	1029000	0.01413	0.943244	0.6805	0.000594387	0.00916954	0.000620567
2021-09-02	5.47896e+08	0			0.65	8.815e+06	6.25865e+07	3.89006e+09	597856	0.941567		0	2021-09-02	0.518675		0.6	0.120671	0.00049503	0.00834486	0.140845	0.6	4.66935e+06	3.83215e+09	0.481325	6.25865e+07	1.13475	1030000	0.0141	0.942125	0.6805	0.000594357	0.009166	0.000620542
2021-09-03	5.48489e+08	0			0.65	8.75019e+06	6.21264e+07	3.89427e+09	592851	0.940461		0	2021-09-03	0.519236		0.6	0.119413	0.000495019	0.00828351	0.140845	0.6	4.63963e+06	3.83679e+09	0.480764	6.21264e+07	1.13475	1031000	0.01407	0.941014	0.6805	0.000594327	0.00916247	0.000620516
2021-09-04	5.49077e+08	0			0.65	8.68452e+06	6.16601e+07	3.89845e+09	587801	0.939365		0	2021-09-04	0.519793		0.6	0.11815	0.000495009	0.00822135	0.140845	0.6	4.60935e+06	3.8414e+09	0.480207	6.16601e+07	1.13475	1032000	0.01404	0.939913	0.6805	0.000594297	0.00915895	0.00062049
2021-09-05	5.4966e+08	0			0.65	8.61803e+06	6.1188e+07	3.90258e+09	582710	0.938278		0	2021-09-05	0.520344		0.6	0.116881	0.000494999	0.0081584	0.140845	0.6	4.57853e+06	3.84597e+09	0.479656	6.1188e+07	1.13475	1033000	0.01401	0.938821	0.6805	0.000594267	0.00915543	0.000620465
2021-09-06	5.50237e+08	0			0.65	8.55074e+06	6.07103e+07	3.90668e+09	577579	0.9372		0	2021-09-06	0.520891		0.6	0.115609	0.000494989	0.0080947	0.140845	0.6	4.54719e+06	3.85052e+09	0.479109	6.07103e+07	1.13475	1034000	0.01398	0.937739	0.6805	0.000594237	0.00915192	0.000620439
2021-09-07	5.5081e+08	0			0.65	8.4827e+06	6.02272e+07	3.91075e+09	572411	0.936131		0	2021-09-07	0.521433		0.6	0.114332	0.000494979	0.00803029	0.140845	0.6	4.51536e+06	3.85504e+09	0.478567	6.02272e+07	1.13475	1035000	0.01395	0.936666	0.6805	0.000594207	0.00914842	0.000620413
2021-09-08	5.51377e+08	0			0.65	8.41395e+06	5.9739e+07	3.91478e+09	567209	0.935073		0	2021-09-08	0.52197		0.6	0.113052	0.000494969	0.0079652	0.140845	0.6	4.48304e+06	3.85952e+09	0.47803	5.9739e+07	1.13475	1036000	0.01392	0.935602	0.6805	0.000594177	0.00914493	0.000620388
2021-09-09	5.51939e+08	0			0.65	8.34451e+06	5.9246e+07	3.91877e+09	561975	0.934023		0	2021-09-09	0.522502		0.6	0.11177	0.000494959	0.00789947	0.140845	0.6	4.45025e+06	3.86397e+09	0.477498	5.9246e+07	1.13475	1037000	0.01389	0.934548	0.6805	0.000594147	0.00914145	0.000620362
2021-09-10	5.52496e+08	0			0.65	8.27442e+06	5.87484e+07	3.92272e+09	556712	0.932984		0	2021-09-10	0.523029		0.6	0.110485	0.000494949	0.00783312	0.140845	0.6	4.41702e+06	3.86839e+09	0.476971	5.87484e+07	1.13475	1038000	0.01386	0.933504	0.6805	0.000594117	0.00913797	0.000620336
2021-09-11	5.53047e+08	0			0.65	8.20373e+06	5.82465e+07	3.92663e+09	551422	0.931954		0	2021-09-11	0.523551		0.6	0.109199	0.000494938	0.0077662	0.140845	0.6	4.38336e+06	3.87277e+09	0.476449	5.82465e+07	1.13475	1039000	0.01383	0.932469	0.6805	0.000594087	0.0091345	0.000620311
2021-09-12	5.53593e+08	0			0.65	8.13246e+06	5.77405e+07	3.93051e+09	546107	0.930934		0	2021-09-12	0.524068		0.6	0.107912	0.000494928	0.00769873	0.140845	0.6	4.34929e+06	3.87712e+09	0.475932	5.77405e+07	1.13475	1040000	0.0138	0.931444	0.6805	0.000594057	0.00913104	0.000620285
2021-09-13	5.54134e+08	0			0.65	8.06066e+06	5.72307e+07	3.93435e+09	540770	0.929924		0	2021-09-13	0.52458		0.6	0.106624	0.000494918	0.00763075	0.140845	0.6	4.31482e+06	3.88143e+09	0.47542	5.72307e+07	1.13475	1041000	0.01377	0.930429	0.6805	0.000594027	0.00912759	0.000620259
2021-09-14	5.54669e+08	0			0.65	7.98835e+06	5.67173e+07	3.93815e+09	535414	0.928924		0	2021-09-14	0.525087		0.6	0.105336	0.000494908	0.0075623	0.140845	0.6	4.27997e+06	3.88571e+09	0.474913	5.67173e+07	1.13475	1042000	0.01374	0.929424	0.6805	0.000593997	0.00912414	0.000620234
2021-09-15	5.55199e+08	0			0.65	7.91558e+06	5.62006e+07	3.94191e+09	530041	0.927934		0	2021-09-15	0.525589		0.6	0.104048	0.000494898	0.00749341	0.140845	0.6	4.24478e+06	3.88996e+09	0.474411	5.62006e+07	1.13475	1043000	0.01371	0.928429	0.6805	0.000593967	0.00912071	0.000620208
2021-09-16	5.55724e+08	0			0.65	7.84237e+06	5.56808e+07	3.94564e+09	524652	0.926953		0	2021-09-16	0.526085		0.6	0.102762	0.000494888	0.00742411	0.140845	0.6	4.20924e+06	3.89417e+09	0.473915	5.56808e+07	1.13475	1044000	0.01368	0.927443	0.6805	0.000593937	0.00911728	0.000620182
2021-09-17	5.56243e+08	0			0.65	7.76877e+06	5.51583e+07	3.94933e+09	519251	0.925983		0	2021-09-17	0.526577		0.6	0.101477	0.000494878	0.00735444	0.140845	0.6	4.17339e+06	3.89834e+09	0.473423	5.51583e+07	1.13475	1045000	0.01365	0.926468	0.6805	0.000593907	0.00911385	0.000620157
2021-09-18	5.56757e+08	0			0.65	7.69481e+06	5.46332e+07	3.95297e+09	513839	0.925022		0	2021-09-18	0.527063		0.6	0.100194	0.000494868	0.00728442	0.140845	0.6	4.13724e+06	3.90248e+09	0.472937	5.46332e+07	1.13475	1046000	0.01362	0.925502	0.6805	0.000593877	0.00911044	0.000620131
2021-09-19	5.57265e+08	0			0.65	7.62052e+06	5.41057e+07	3.95658e+09	508419	0.924072		0	2021-09-19	0.527545		0.6	0.0989139	0.000494857	0.00721409	0.140845	0.6	4.10081e+06	3.90658e+09	0.472455	5.41057e+07	1.13475	1047000	0.01359	0.924547	0.6805	0.000593847	0.00910703	0.000620105
2021-09-20	5.57768e+08	0			0.65	7.54594e+06	5.35761e+07	3.96016e+09	502993	0.923131		0	2021-09-20	0.528021		0.6	0.0976363	0.000494847	0.00714349	0.140845	0.6	4.06412e+06	3.91064e+09	0.471979	5.35761e+07	1.13475	1048000	0.01356	0.923602	0.6805	0.000593817	0.00910363	0.00062008
2021-09-21	5.58266e+08	0			0.65	7.47109e+06	5.30447e+07	3.96369e+09	497564	0.922201		0	2021-09-21	0.528492		0.6	0.0963621	0.000494837	0.00707263	0.140845	0.6	4.02718e+06	3.91467e+09	0.471508	5.30447e+07	1.13475	1049000	0.01353	0.922666	0.6805	0.000593787	0.00910024	0.000620054
2021-09-22	5.58758e+08	0			0.65	7.39601e+06	5.25117e+07	3.96718e+09	492132	0.921281		0	2021-09-22	0.528958		0.6	0.0950916	0.000494827	0.00700156	0.140845	0.6	3.99002e+06	3.91866e+09	0.471042	5.25117e+07	1.13475	1050000	0.0135	0.921741	0.6805	0.000593757	0.00909686	0.000620029
2021-09-23	5.59245e+08	0			0.65	7.32074e+06	5.19772e+07	3.97064e+09	486700	0.92037		0	2021-09-23	0.529418		0.6	0.0938252	0.000494817	0.0069303	0.140845	0.6	3.95265e+06	3.92261e+09	0.470582	5.19772e+07	1.13475	1051000	0.01347	0.920825	0.6805	0.000593727	0.00909348	0.000620003
2021-09-24	5.59726e+08	0			0.65	7.2453e+06	5.14416e+07	3.97406e+09	481271	0.91947		0	2021-09-24	0.529874		0.6	0.0925635	0.000494807	0.00685888	0.140845	0.6	3.91509e+06	3.92653e+09	0.470126	5.14416e+07	1.13475	1052000	0.01344	0.91992	0.6805	0.000593698	0.00909011	0.000619977
2021-09-25	5.60202e+08	0			0.65	7.16972e+06	5.0905e+07	3.97743e+09	475845	0.91858		0	2021-09-25	0.530325		0.6	0.0913067	0.000494797	0.00678733	0.140845	0.6	3.87736e+06	3.93041e+09	0.469675	5.0905e+07	1.13475	1053000	0.01341	0.919025	0.6805	0.000593668	0.00908675	0.000619952
2021-09-26	5.60672e+08	0			0.65	7.09404e+06	5.03677e+07	3.98077e+09	470426	0.9177		0	2021-09-26	0.53077		0.6	0.0900552	0.000494787	0.00671569	0.140845	0.6	3.83947e+06	3.93425e+09	0.46923	5.03677e+07	1.13475	1054000	0.01338	0.91814	0.6805	0.000593638	0.0090834	0.000619926
2021-09-27	5.61137e+08	0			0.65	7.01828e+06	4.98298e+07	3.98408e+09	465014	0.91683		0	2021-09-27	0.53121		0.6	0.0888095	0.000494777	0.00664397	0.140845	0.6	3.80144e+06	3.93805e+09	0.46879	4.98298e+07	1.13475	1055000	0.01335	0.917265	0.6805	0.000593608	0.00908005	0.000619901
2021-09-28	5.61597e+08	0			0.65	6.94248e+06	4.92916e+07	3.98734e+09	459612	0.915969		0	2021-09-28	0.531645		0.6	0.0875699	0.000494766	0.00657221	0.140845	0.6	3.76329e+06	3.94181e+09	0.468355	4.92916e+07	1.13475	1056000	0.01332	0.916399	0.6805	0.000593578	0.00907671	0.000619875
2021-09-29	5.62051e+08	0			0.65	6.86666e+06	4.87533e+07	3.99056e+09	454221	0.915119		0	2021-09-29	0.532075		0.6	0.0863367	0.000494756	0.00650044	0.140845	0.6	3.72503e+06	3.94554e+09	0.467925	4.87533e+07	1.13475	1057000	0.01329	0.915544	0.6805	0.000593548	0.00907338	0.00061985
2021-09-30	5.625e+08	0			0.65	6.79085e+06	4.8215e+07	3.99375e+09	448844	0.914279		0	2021-09-30	0.5325		0.6	0.0851103	0.000494746	0.00642867	0.140845	0.6	3.68668e+06	3.94922e+09	0.4675	4.8215e+07	1.13475	1058000	0.01326	0.914699	0.6805	0.000593518	0.00907006	0.000619824
2021-10-01	5.62944e+08	0			0.65	6.71508e+06	4.76771e+07	3.9969e+09	443481	0.913449		0	2021-10-01	0.53292		0.6	0.083891	0.000494736	0.00635694	0.140845	0.6	3.64826e+06	3.95287e+09	0.46708	4.76771e+07	1.13475	1059000	0.01323	0.913864	0.6805	0.000593489	0.00906674	0.000619799
2021-10-02	5.63382e+08	0			0.65	6.63938e+06	4.71396e+07	4.00001e+09	438135	0.912629		0	2021-10-02	0.533335		0.6	0.082679	0.000494726	0.00628528	0.140845	0.6	3.60978e+06	3.95648e+09	0.466665	4.71396e+07	1.13475	1060000	0.0132	0.913039	0.6805	0.000593459	0.00906343	0.000619773
2021-10-03	5.63814e+08	0			0.65	6.56376e+06	4.66027e+07	4.00308e+09	432806	0.911818		0	2021-10-03	0.533744		0.6	0.0814748	0.000494716	0.0062137	0.140845	0.6	3.57125e+06	3.96005e+09	0.466256	4.66027e+07	1.13475	1061000	0.01317	0.912223	0.6805	0.000593429	0.00906013	0.000619747
2021-10-04	5.64242e+08	0			0.65	6.48827e+06	4.60667e+07	4.00612e+09	427497	0.911018		0	2021-10-04	0.534149		0.6	0.0802785	0.000494706	0.00614223	0.140845	0.6	3.5327e+06	3.96358e+09	0.465851	4.60667e+07	1.13475	1062000	0.01314	0.911418	0.6805	0.000593399	0.00905683	0.000619722
2021-10-05	5.64664e+08	0			0.65	6.41291e+06	4.55317e+07	4.00912e+09	422209	0.910227		0	2021-10-05	0.534549		0.6	0.0790906	0.000494696	0.00607089	0.140845	0.6	3.49414e+06	3.96708e+09	0.465451	4.55317e+07	1.13475	1063000	0.01311	0.910622	0.6805	0.000593369	0.00905354	0.000619696
2021-10-06	5.65081e+08	0			0.65	6.33772e+06	4.49978e+07	4.01208e+09	416943	0.909446		0	2021-10-06	0.534943		0.6	0.0779111	0.000494686	0.00599971	0.140845	0.6	3.45557e+06	3.97053e+09	0.465057	4.49978e+07	1.13475	1064000	0.01308	0.909836	0.6805	0.00059334	0.00905026	0.000619671
2021-10-07	5.65493e+08	0			0.65	6.26272e+06	4.44653e+07	4.015e+09	411701	0.908675		0	2021-10-07	0.535333		0.6	0.0767404	0.000494676	0.00592871	0.140845	0.6	3.41702e+06	3.97395e+09	0.464667	4.44653e+07	1.13475	1065000	0.01305	0.90906	0.6805	0.00059331	0.00904699	0.000619645
2021-10-08	5.65899e+08	0			0.65	6.18794e+06	4.39344e+07	4.01789e+09	406484	0.907913		0	2021-10-08	0.535718		0.6	0.0755788	0.000494665	0.00585791	0.140845	0.6	3.3785e+06	3.97733e+09	0.464282	4.39344e+07	1.13475	1066000	0.01302	0.908294	0.6805	0.00059328	0.00904372	0.00061962
[truncated: 329 more rows]

## Sheet: Analysis
	Predicted Known cases	3/27 Known cases + prediction	Actual Known cases		day before predicted		% delta from day before prediction														= ventilators requierd per known active case / total number of ventilators	ratio of total cases to known cases =		6	Initial predicted peak cases 120 million (38 million known, 1.2 million critical) on 4/18/2020	unlock effectiveness=	0.5
[truncated: 74 more rows]

[truncated: 1 more sheets: Archive]
